# Supplementary material
Source: Research Square preprint supplement (doi:10.21203/rs.3.rs-9267576/v1)
Supplement: Supplementary file 1 [file af619f8f77d5706454fdf1d6.xlsx]

## Sheet: ST1--LC-MS spent media
Supplementary Table ST1 - Area under the curve (AUC) of the time series of all components in culture media with and without cotton hydrolysates measured by LC-ESI-MS
Sample	1_1_S_Control	1_2_S_Control	1_3_S_Control	1_1_S_Control	1_2_S_Control	1_3_S_Control	1_1_S_Control	1_2_S_Control	1_3_S_Control	1_1_S_Control	1_2_S_Control	1_3_S_Control	1_1_S_Control	1_2_S_Control	1_3_S_Control	1_1_S_Control	1_2_S_Control	1_3_S_Control	1_1_S_Control	1_2_S_Control	1_3_S_Control	1_1_S_Control	1_2_S_Control	1_3_S_Control	1_1_S_Control	1_2_S_Control	1_3_S_Control	1_1_S_Control	1_2_S_Control	1_3_S_Control	1_1_S_Control	1_2_S_Control	1_3_S_Control	2_1_S_H1A	2_2_S_H1A	2_3_S_H1A	2_1_S_H1A	2_2_S_H1A	2_3_S_H1A	2_1_S_H1A	2_2_S_H1A	2_3_S_H1A	2_1_S_H1A	2_2_S_H1A	2_3_S_H1A	2_1_S_H1A	2_2_S_H1A	2_3_S_H1A	2_1_S_H1A
Label	Day 0	Day 0	Day 0	Day 1	Day 1	Day 1	Day 2	Day 2	Day 2	Day 3	Day 3	Day 3	Day 4	Day 4	Day 4	Day 5	Day 5	Day 5	Day 6	Day 6	Day 6	Day 7	Day 7	Day 7	Day 8	Day 8	Day 8	Day 9	Day 9	Day 9	Day 10	Day 10	Day 10	Day 0	Day 0	Day 0	Day 1	Day 1	Day 1	Day 2	Day 2	Day 2	Day 3	Day 3	Day 3	Day 4	Day 4	Day 4	Day 5
70.013@7.2	68722.4	95473	109700	94022.1	117968	91640.7	116854	95349.3	100920	112371	104123	137137	123688	132197	120571	120338	110464	119748	93251.8	123594	125544	99401.4	111791	98792.1	116825	121908	166731	91063	118518	100765	111800	136072	106032	104374	95565.1	102681	60420.3	117191	104989	98468.3	129724	110360	116983	96762.9	150715	129335	89653.5	140645	65591.2
70.013@2.22	53122.6	18057.8	27002.2	62613	65873.1	77265.8	16039.4	49964.7	83728.9	31611.5	57030.6	70512.1	40729.1	20840.9	38475.3	41097.5	21048.5	59403.6	56592	30376.3	60803.4	60494.3	20788.7	73403.5	16147.8	53499.1	37790.2	48836.1	20474.9	35982.7	87202.7	33273.4	312812	101887	24510	41032.3	82222.1	18847.1	65315.5	72001.6	29033.3	65159.2	88762.4	50311.8	46286.5	50818.7	1000	33362.5	32258.1
70.013@1.05	404749	341976	344658	314816	319570	312188	269651	334265	251645	239863	239698	248719	206445	233368	213392	296665	229918	223910	279182	196303	223911	197615	201790	199094	212160	271420	512576	235187	264653	318534	276474	267989	294308	405833	391638	449237	427235	353307	696670	306505	341071	324139	250175	297710	301777	258247	270147	255520	258725
70.013@5.32	22337	63391	102028	12130.7	102660	38195.7	102630	1000	16963.3	51184	61674.1	11788.9	231805	40491.4	184948	24732.9	196822	11935.1	165921	1000	27725.3	31659.4	19541.6	77649.5	1000	94106.7	27387.4	215043	19972.2	166093	23349.8	291683	34850.9	47960.4	76108.6	26127.4	56257.3	15004	26189	26921.3	30880.9	44012.5	22973.2	10572.2	37578.8	294165	1000	255893	14300.8
70.066@15.51	1000	1000	1000	1000	1000	1000	16399.4	1000	12508	45382.2	1000	57969.4	25599.1	22247.5	220869	42166.6	14119.4	31041.6	75696.6	14423.4	48194.9	129396	12163.9	23548.9	207251	69968.7	82009.9	298262	218285	88441.4	40540.5	35678.5	26940.8	1000	1000	1000	10151.5	1000	1000	29992.2	1000	14119.3	34224.9	46980.2	69068.7	21282.5	59700.8	11258.5	25109.5
70.066@15.72	1000	1000	1000	1000	20974.9	21231.1	16944.7	15627.2	19546.5	96207.1	76275.1	41779.6	21137.4	50775	26277.1	75037.8	18026.6	17395.7	35222.1	37695.1	33882.8	133654	17056.4	38474.5	40253.8	93850.7	91188	47632.6	78570.4	52810.7	333556	208494	31291.5	1000	1000	1000	16036.8	28006.1	1000	19848.6	34894.7	43173.4	14543	14769.9	109904	60323.6	17770.8	17858.1	136919
70.066@15.91	1000	1000	1000	1000	30880	14594.1	38607.5	29668.4	54027.7	35864.2	13619	11596.7	20508.3	33395.2	94365.2	166826	64919.7	36934.3	71379.8	114225	20275.9	77623.1	17056.4	32223.1	51283.9	37493.4	75819.8	57421.9	40300.6	253212	64681.7	19805.9	78221.7	1000	1000	1000	1000	1000	17848.2	16844.8	58896.9	11684.8	32168.9	58520.4	26793.9	13856.2	25245.5	36567	73437.4
70.066@1.32	2.11798e+06	2.3142e+06	2.29545e+06	2.22596e+06	2.2835e+06	2286208	2.17686e+06	2.27672e+06	2.26192e+06	2.19633e+06	2.27479e+06	2.11911e+06	2.08264e+06	2.09957e+06	2139438	2.04457e+06	2037283	2.07997e+06	2.00492e+06	2.00942e+06	2.04238e+06	1.97835e+06	2069046	1986655	1.99807e+06	1942441	1.98325e+06	2.01082e+06	1.98049e+06	1.97548e+06	1.94694e+06	1.95241e+06	2.00377e+06	1.86562e+06	1.95078e+06	1.93177e+06	1.90663e+06	1.94423e+06	2.06161e+06	1.85107e+06	2.01038e+06	2.00077e+06	1.95805e+06	1.98137e+06	1924988	1.92272e+06	1.93659e+06	1.83798e+06	1.88563e+06
70.066@0.2	1000	1000	10530	53817.4	22388.5	12136.3	24975.5	32825.2	25288.4	23578.5	34853.2	33195.2	40981.5	42420.3	24505.5	22761.8	18815.4	39260.4	24191	29397.6	28136.8	57578.7	11013.6	24672.1	15469.6	42372.2	31842.6	61924.2	14119.2	32815.3	31390.1	39648.7	59881.6	1000	1000	13026.5	48020.6	44769	79184.6	27659.2	12628	37185.9	16405	26818.5	40628.4	15432.5	32378.5	13865.1	57070.5
70.515@1.06	20644	15065.6	15954.7	14705.1	15497.3	14698.7	12478.2	13946.9	11524.1	1000	1000	10779.6	11181.7	1000	1000	12743.7	1000	1000	14972.9	1000	1000	1000	1000	1000	11190.3	13470.5	21591.1	1000	11177.4	15144.8	10196.9	1000	11865	17606.8	20498.9	22142.5	17143.6	20109.7	33314	14618.8	13363.7	15132.4	11751.8	15213.4	13494.4	11068.3	12879.8	11009.2	1000
72.045@15.49	17236.2	1000	1000	27474.4	21324.6	1000	39673.5	40117.5	55911.5	26878.2	50692.5	15337.3	11849.6	13364.2	18879	64677.8	44934.1	89460.4	38696	45088	13396.7	30863.8	36639	15992	41898.4	64210.4	28623.4	35639	27044.1	75161.7	25381.4	54758.9	1000	10455.8	1000	1000	49345.2	30061.5	41297.9	61648.2	35507.1	32824.9	33900.5	11675.8	26115.3	29286.6	55043.1	14465	39850.1
72.045@15.85	35366.4	25365.6	16285.9	112775	18724	164044	27574.9	54651	37044.6	329628	15371.6	86122.9	58830	32478.3	25775.8	40857.5	322064	42046.7	61345.6	50425.4	67385.6	36403.6	53918.5	64339.9	64098.5	90982.2	86314.9	13892	32043.3	38108	20043	13897.4	31291.8	19473.3	49501.1	27388.7	14043.8	17955.4	24135.8	62471.2	48719.4	45161.2	45660.6	41289.3	42516.4	77468.4	23651.2	35070.3	166106
72.045@16.01	1000	31435.1	28735.5	32060.6	145988	51577.3	91894.4	234252	216284	41496.2	196561	156177	300238	78735.8	267578	79695.8	71485.2	89159.2	261512	323189	54416.1	281783	228510	341266	29865.4	369739	29584.5	262360	356994	351419	311772	339997	284165	10510.1	58842	43802.8	23870.8	84051.4	110950	68852.1	64938.9	248434	139640	307364	224554	64100.5	195371	331755	84699.7
72.045@0.37	23202.5	39254.8	17806.8	12708.8	38662.8	35202.2	30493	1000	25104.1	10378.1	32043.8	16940.9	15679.6	23014.3	22111.9	26408.8	37277.7	19876.1	31357	28080.1	29050.1	1000	28942.9	11654.2	30427.5	21920.7	32810.8	79116.1	23485.8	36452.8	17236	21476.6	14929.6	17080.6	21306.8	35494.1	38813.4	33885.6	29460.6	40413	21319.6	20277.9	20247.9	15372	22486.8	27252.5	38722.3	29578	20877.8
72.045@0.22	1000	1000	12156.8	46599.4	19922	54104.7	1000	18442.3	21630.8	26166.2	22398.8	62900.8	22654.3	43225.5	1000	25899.7	19224.2	41347.8	25633.7	23960.2	13357.7	62124.2	23106.6	31297.6	38225.2	18431.1	23675	26405.3	35628.4	28137.6	56130.8	44538.9	10479.3	1000	1000	1000	56554.7	56380	62418.9	21351	21655.1	41208.1	12815.6	26391.6	20143.8	21336	16186.1	18125.8	32434
72.078@16.04	217485	94482.6	330014	236490	153009	147847	132383	2.07983e+06	2.13518e+06	1.99568e+06	207198	2.08867e+06	227151	1.82324e+06	1.86984e+06	1.86442e+06	1710582	1.79971e+06	1.80076e+06	1.66477e+06	1.75583e+06	1.79576e+06	1.62298e+06	1.80853e+06	1.83636e+06	1.80283e+06	1795213	1.7837e+06	1.86738e+06	1.10199e+06	1.83565e+06	1.79259e+06	1.6862e+06	199648	223633	41126.1	297298	325938	90981.3	1.98837e+06	2083643	1.98135e+06	1.95448e+06	2058168	2.06316e+06	1875017	1.91173e+06	1.93418e+06	1.9176e+06
72.079@0.28	447350	412758	447202	326070	407837	110524	488191	494214	523355	485539	490021	496043	335584	511205	553813	525690	449826	513046	493935	376014	462363	476231	489036	483789	407426	483169	515473	408172	503154	558833	575393	524668	376347	417673	260993	453498	394481	396712	429351	472116	463688	471033	492242	431573	376104	357468	98670	466513	519748
72.081@15.9	374105	301240	2.42677e+06	340535	311893	281779	2.10077e+06	351827	342809	298901	1.94822e+06	338365	202511	309908	190276	293909	302871	288388	54170	166671	170332	297409	149269	136096	328875	290058	65096.8	303190	321934	330266	292049	139680	127725	336473	245922	407575	382455	339725	2.11189e+06	145920	309615	350217	163351	177120	226045	199320	185972	300108	208646
72.081@15.75	170739	283074	86635.3	2.3103e+06	192356	294515	200511	274997	152972	263539	295539	172130	1.83144e+06	314076	86719.4	147012	217000	268286	174067	277314	169154	311304	105501	299031	194681	187810	313511	146624	232902	191490	289754	187631	170390	131111	240820	2.32998e+06	2189299	372684	344185	269140	327630	341729	336654	360481	152331	236078	205496	286054	137128
72.081@15.29	2.58612e+06	298786	342357	294172	285500	288878	174281	264863	320987	196299	150003	210398	55780.2	96790.3	274348	222563	79603.8	41432.8	161494	128893	254018	225580	230076	102829	79382.8	172396	234142	176103	71504.6	106103	106028	131935	107177	366551	335607	169455	316127	268877	199889	170073	253218	87916.4	259047	225835	272540	46581.8	248998	231108	68322.3
72.081@15.6	363064	342912	325836	358928	241206	2.18177e+06	253490	302295	267732	150369	90805.7	273237	117554	77373.8	290373	71420.7	224268	287146	56919.1	127390	203479	294961	149127	228120	179551	168856	139507	84784.2	157972	272152	113937	223845	144293	335503	397147	58834.9	183982	233352	245555	334829	114761	324883	160406	199929	247303	226919	205435	213965	131125
72.081@15.44	255941	2.5748e+06	293952	333403	2.16172e+06	301805	253301	235579	232934	284282	250654	289253	292033	126321	291492	171668	104117	241642	236751	73554	193678	264302	75340.6	163409	252273	251366	275682	230910	200993	663716	261592	61688.8	135888	2.32566e+06	2.34145e+06	320929	314140	2.24299e+06	329367	198592	326484	150493	125274	295338	305510	297987	282872	137892	107123
72.081@1.49	15438050	16479618	16638951	15705121	17157734	17232966	15942565	16250979	16365621	15576458	15811512	15800772	14828461	15189758	15221403	13656272	14093715	14240515	13375585	13894002	14113708	13483454	13902808	13918287	13423010	13705741	14282282	13682153	14063018	13842043	13125893	13987890	14104150	17668620	18068654	18493008	17818780	18590750	19059812	17737940	18837564	18321622	17588588	18566628	18116738	17476504	18100382	17858826	17196058
72.081@1.05	94992.4	91346.4	95066.6	100164	95231.2	86252.4	89792.8	92334.4	84339.6	82238.5	80537.4	83562	83457.2	90287.2	92344.2	79790.4	85836.8	84548.4	82090.1	85147.8	83016.7	86250.2	86497.3	83253.5	86750.8	81781.2	80797.5	91951.9	85130	89442.6	80457.9	87231.2	90495.9	108345	114279	120872	114050	108026	114604	103485	111105	109594	110526	64967.5	114972	105743	107142	103882	106221
73.029@16.29	45220.5	278233	328727	330508	326766	80019.1	273903	307541	291354	316915	248522	255946	313808	296807	359522	302572	307553	277911	223159	279784	341527	211367	267549	260250	212259	73525.2	224490	258474	289724	287850	267964	259629	87195.9	373949	85839.2	444441	335494	292393	331982	281970	230235	268292	264036	317326	340304	291128	397916	294925	360572
73.076@0.16	114868	91691.3	109462	41208.4	77393.1	52702.8	42492	71220.8	65367.3	47469.2	59348.9	59722.9	30900.3	46426.5	45051.4	59757.9	58781.9	50434.2	76440.6	95957.2	44484.1	87448.2	27910.6	60230.5	33363.5	57540.3	57238.6	53910.5	47974.6	71967.8	100625	62813.1	63376.7	35244.7	26862.5	125126	45516.2	54000.2	99355.3	98343.6	56694.4	85343.5	19869.7	63071.4	46469.3	52918.3	74327	23402.8	69853.9
73.532@1.06	69151.4	72667.9	68114.3	60851.5	59207.9	63694.8	54778.3	57680.6	47652.7	50146.2	45657.6	44599.3	39179.7	41193.3	37802.8	35453.6	42075.4	38362.9	39348.4	39111.9	42983.4	34922	41586.4	36466.5	36186.9	43846.1	76133.9	43474.4	52431.2	51671.7	54710.5	58951.3	68270	133617	128402	132428	121175	128121	121541	99400	109692	93259	88551.3	88369.5	93787.4	82075.5	93338.6	79413.4	90879.3
74.024@1.23	200046	210169	182358	203402	181039	203070	202365	191449	202230	186884	173900	168945	160915	162748	154764	132556	132582	115907	88675.6	76174.9	85659.2	70249.7	69802.8	74739.6	75009.8	70614.2	78349.4	90058.7	87309.8	73245.3	99857.7	105555	91988.8	230321	200288	186654	220176	201200	199082	214605	201094	198836	209161	203836	194802	181346	157399	177521	132232
74.061@15.44	286896	100375	117313	173213	265813	313929	196527	87803.2	111691	371942	350325	295004	2303633	126730	216666	163510	413406	247423	213907	207231	462639	439473	296809	140081	509974	249900	440107	236463	173399	410723	197943	376678	443505	329209	269734	49258.9	342437	376419	329037	388917	196576	229873	399436	285004	252323	330575	169090	419065	149817
74.061@15.56	345505	90956.4	175140	374694	192598	424848	392018	206946	413595	205674	451310	445164	148879	212223	2.57083e+06	325401	116304	461952	286650	203959	438196	200038	188475	124852	2.73175e+06	286537	314307	261342	162212	453952	2526737	456423	233535	1.70571e+06	135989	49258.9	241533	379733	182328	419521	458745	308790	333069	302486	329192	361839	209596	434123	249628
74.061@15.7	176454	56070.5	173878	354901	307465	124010	475217	384021	398765	2.44472e+06	433957	285582	290607	422518	511074	389756	465454	451474	205053	216730	406032	483887	409442	471688	493898	403521	496812	123577	224670	500651	472754	2.39594e+06	426007	171464	370993	1.91019e+06	338398	181115	132711	149598	274013	97770.5	344101	358196	485253	351913	514123	141133	2.54854e+06
74.061@15.99	350590	1.76946e+06	144160	2.26721e+06	2.35255e+06	2.31187e+06	149892	2407346	2.45755e+06	204135	292454	2517815	193313	175026	439578	385271	404551	2415671	444385	2424623	437324	2.59641e+06	435017	462689	490224	431790	465981	2.24962e+06	2339918	2.57703e+06	241783	407519	424634	129907	1835148	379052	2.31373e+06	2364138	2.21738e+06	175320	194640	2540575	2610988	297206	2.38424e+06	2.60874e+06	430792	2.43577e+06	469545
74.061@15.83	111649	293759	95201.8	368844	444170	255711	2.32851e+06	463754	277561	363853	2.50317e+06	246225	123452	2.54013e+06	479015	2566908	2.31166e+06	103038	2.43835e+06	328433	2.42939e+06	300457	2.3684e+06	2.60268e+06	512767	2.69871e+06	2.66277e+06	318033	212359	273337	506015	470303	2.33582e+06	136206	193318	169879	286790	269387	132711	2443094	2.42123e+06	440535	456306	2.52111e+06	452908	476360	2.53182e+06	472162	490353
74.061@1.23	1.79668e+06	1.76494e+06	1.77968e+06	1.71462e+06	1.97401e+06	1.69599e+06	1.72606e+06	1.67669e+06	1.87013e+06	1663462	1.81014e+06	1.63877e+06	1.63426e+06	1.61169e+06	1786833	1.78507e+06	1.488e+06	1.48524e+06	1.73917e+06	1.56819e+06	1.50396e+06	1456445	1411982	1.42012e+06	1.43599e+06	1.44982e+06	1.48296e+06	1.50631e+06	1.43568e+06	1452618	1.47171e+06	1.47308e+06	1.68592e+06	1.73161e+06	1.85177e+06	1.82792e+06	1.71841e+06	1.73804e+06	1.72964e+06	1719333	1740717	1.69314e+06	1.67705e+06	1.72927e+06	1.69031e+06	1.68501e+06	1.64609e+06	1.60595e+06	1.59759e+06
74.061@0.29	1.68269e+06	642173	709886	887686	992667	1.06337e+06	800406	761604	714423	665350	652890	680759	661997	755899	749133	623793	704732	764803	815208	648112	755726	1.81001e+06	729326	1.71118e+06	835807	1.73036e+06	772769	735654	694327	720005	813893	722932	640259	377063	666049	635592	988101	915296	1.02221e+06	756392	753538	1.42382e+06	361039	701432	356398	816453	907611	202455	678228
74.097@15.32	4.25955e+06	2.94678e+06	3.77007e+06	2655977	845367	2807287	1.94623e+06	2.11727e+06	2.29646e+06	1.33129e+06	1.90339e+06	1.77762e+06	1.10488e+06	1.24909e+06	306584	1.20442e+06	535410	706252	1.07924e+06	1.04803e+06	1.08512e+06	445351	957395	859077	898915	893866	730550	1.27322e+06	1.28423e+06	1363546	1.09404e+06	1.43027e+06	1.32406e+06	3960978	3584414	3.24347e+06	2.65126e+06	2664738	2647594	1.96721e+06	2.22159e+06	1.41794e+06	11843829	333913	1.77305e+06	1.45327e+06	1.51374e+06	685385	1.24885e+06
74.097@15.42	3.7636e+06	4009943	24148892	2.07281e+06	3.09689e+06	17318280	1.19736e+06	2.31047e+06	2.31648e+06	1.68248e+06	11363530	1.92844e+06	1.39656e+06	1.33045e+06	781042	1.1248e+06	1.39774e+06	898044	714865	1.02773e+06	812560	214505	1.05202e+06	679275	680311	698711	583240	1387254	1.47147e+06	1302989	753591	685955	1.54698e+06	23814888	3.80544e+06	2.84312e+06	17778556	17470594	2.78111e+06	2140230	2.35099e+06	2060971	1.8696e+06	1.18152e+06	1.42051e+06	1686453	1.55272e+06	1591894	784159
74.097@15.56	4.03143e+06	4.10717e+06	3.5487e+06	18187510	2405999	2.65057e+06	2.09046e+06	2.23931e+06	1.68403e+06	1.81132e+06	1.14696e+06	1870558	1.29628e+06	8450919	1.39069e+06	8.38131e+06	1.29852e+06	1.23071e+06	1157643	523659	483579	440488	921592	1.07271e+06	870189	369876	637114	1.02018e+06	8675492	1.51152e+06	1.38071e+06	1.38236e+06	1.55696e+06	1.98817e+06	2.36311e+06	1.50983e+06	1.95028e+06	808509	2342802	921154	13685296	2.14346e+06	1.95261e+06	1.93411e+06	1.89641e+06	1.59378e+06	1.44422e+06	9289267	593988
74.097@15.71	3.72998e+06	1.5443e+06	3558127	2763462	1.10082e+06	1.68702e+06	1.88328e+06	2.42879e+06	1.90661e+06	1.00128e+06	1.77686e+06	1.88393e+06	1.24648e+06	1.06047e+06	8448744	1.03418e+06	8.21577e+06	1.28189e+06	1.09931e+06	6863389	1.12832e+06	906159	492171	1.00548e+06	966840	1017711	938343	460418	1.65177e+06	1.07758e+06	1.46611e+06	1.56576e+06	1.05795e+06	3.65835e+06	3.41152e+06	1.92145e+06	2.75477e+06	2.71966e+06	1.90416e+06	2.2399e+06	1.41221e+06	1.12793e+06	1440737	1.87474e+06	1.79881e+06	9721551	9810071	1.14504e+06	1.07795e+06
74.097@15.81	1.90232e+06	1.63061e+06	3.34104e+06	2771915	2.07463e+06	2.64229e+06	1.62568e+06	1.28133e+06	2171990	11625428	1.82529e+06	1.88528e+06	373819	637329	1.16108e+06	1.37952e+06	742538	8114677	614611	1.22392e+06	1.1845e+06	1.05694e+06	1.0711e+06	706392	865391	5.25632e+06	1.0142e+06	8540485	1.03512e+06	8422069	1.53296e+06	9353845	981046	3.65282e+06	3.23891e+06	2.17363e+06	2.73852e+06	2.25874e+06	2703704	13706139	2.17955e+06	2.29154e+06	1.21203e+06	10891454	485271	1.59705e+06	1.63399e+06	1.15666e+06	8228548
74.097@15.93	2777892	2859165	2.85012e+06	2.04894e+06	2.16498e+06	1002454	14251389	1.17371e+06	1824074	1.59945e+06	1.03531e+06	1.39348e+06	606021	1.08949e+06	1.15369e+06	1.14529e+06	985761	771936	752940	927291	6818140	472739	6452153	870789	5.45559e+06	698931	5221492	838048	1.34503e+06	910843	9319187	1478048	8544619	2833704	2.82832e+06	2897018	1.60838e+06	1.36667e+06	2.0742e+06	1.91331e+06	1.59419e+06	13600198	1.55761e+06	1.64273e+06	1.41198e+06	1.29265e+06	704755	1.28721e+06	1.1089e+06
74.097@0.33	832608	2.08453e+06	1.88377e+06	461411	250215	343859	1.12659e+06	1.14159e+06	1.22303e+06	957777	1.0617e+06	1.03538e+06	727674	710989	670033	746951	707096	1.14167e+06	583746	549313	605937	517088	539799	567773	487017	100060	531362	848445	961938	669634	1.18336e+06	993459	920707	1.95234e+06	1.9572e+06	1.61919e+06	414834	297131	419299	1.11683e+06	1.24723e+06	1.28677e+06	875557	1.03537e+06	948299	884310	850096	845511	643290
75.1@13.64	84733.2	28816.6	29588.4	75090.6	57115.4	78493.6	16487.2	56459.5	36216	327995	26555.9	52311	24775	32861.5	16140.6	15093.9	1000	12285.6	30482.6	18831.8	34859.2	177466	12963.1	174437	151605	12285.1	1000	11986.8	31992.2	30129.3	177698	27248.9	19442.5	29456.3	88006.5	16534.3	63040	55002.5	69700.7	22165.9	29376.8	26805.3	43549.5	20537.8	48264	259461	257471	22769.2	221107
76.04@15.58	42883.4	172669	63027.2	136206	1.50937e+06	230857	781886	74398.9	119342	223769	157141	167322	156916	141356	221473	186194	280249	193288	106100	1.52531e+06	251120	45937.1	1.52363e+06	278921	282621	115514	138819	101706	146249	86866.8	1.54181e+06	107099	112562	160349	68988.6	66871.6	60566.5	625591	192826	144911	219732	267266	1.64271e+06	252244	97652	160415	120840	121811	102830
76.04@15.73	73597.7	100944	1.40771e+06	114831	65398.4	99017.4	179997	203467	335421	1.60088e+06	1.59567e+06	110005	143985	200586	144137	1.53585e+06	233841	160733	262494	153189	1.51987e+06	87906.3	178917	85332.2	1.59368e+06	217092	1.59771e+06	162330	145674	1.59411e+06	186312	1.53167e+06	168764	1375191	215700	73308	141024	270248	37995.2	190452	319895	174318	303404	128093	92272.5	104755	242610	227055	1.09753e+06
76.04@16	1.60423e+06	190697	114017	1.47394e+06	159400	1564225	114603	1.56624e+06	1.64787e+06	137798	204453	1.07727e+06	1.47326e+06	1.57035e+06	269712	233400	188411	1.5035e+06	1.57337e+06	262348	200906	1.59565e+06	210430	1.56081e+06	268023	1.64771e+06	263592	1.36338e+06	1.45631e+06	246099	259077	146139	253067	211770	1.03684e+06	206131	1551825	887523	1.41184e+06	1.63688e+06	137900	284504	170442	279635	1.66306e+06	1577713	1.57946e+06	1.54941e+06	257747
76.04@15.87	81422.8	149510	138457	142860	171073	246052	150668	234313	241620	184073	140293	109549	310896	140959	851009	232475	1.40836e+06	297829	193733	153849	286265	286399	108620	283575	141125	213140	82075	167725	96119.1	140252	146111	237680	1.49128e+06	181069	216265	168690	165861	221939	129338	140329	1.72502e+06	1.67945e+06	203599	1628895	204711	265799	186889	307440	233809
76.04@1.22	39953.3	51298	50061.6	70080.1	47988.5	62029.2	119002	78465.6	103377	102246	113854	128743	109665	151307	248183	138852	180364	154310	175478	202097	203332	254140	250574	355205	233280	245308	377575	450597	420297	404155	423358	433659	406221	71507	100709	94340.5	89609.9	74690.7	110870	92603.6	106169	117264	255358	138089	266937	171262	153139	194387	231876
76.04@0.27	363925	376206	280902	390208	562804	384591	392394	363746	402242	378185	375584	398033	412314	428924	335013	345934	398431	386518	365799	387017	411262	373682	419474	386794	409445	392606	404423	409646	429519	210275	385309	431571	384272	328971	301698	457640	420177	434730	445652	432310	374641	392022	336691	373593	406657	382248	326344	401695	399978
78.008@0.31	75274.2	217448	44609	426222	447013	498032	76137.7	210482	201065	173614	174986	12990	78015.7	49186.1	229040	71741.5	41640.5	72211.2	175999	159111	21215	172354	134930	189320	57447.3	48334.3	77475.3	161931	169501	14121.4	155542	184722	186452	96934.1	122252	89588.3	493135	448294	521907	190394	61793.7	184850	151833	32924	13775.4	141626	15505.9	12947.8	103341
78.011@15.56	1000	1000	1000	23585.6	14890.7	33133.1	52455.5	19718.3	26842.7	28765.9	22667	156992	39550.1	18356.5	68243.7	54956.8	27605.2	33810	130240	53487.8	125733	41468.2	90713	74042.9	66348.6	127614	45724.3	26752.5	56598.6	20452.2	34583.3	47078.6	30300.8	1000	1000	1000	16208.4	31673.7	21853.4	79786.6	20964.4	13534.9	132928	23730	29951.7	29213.9	95874.1	24955.6	18267.6
78.011@15.76	11687.8	1000	1000	26343.4	32024	45489.3	18287.6	67006	105503	65960.2	29476.2	35976	46263.4	98661.2	32660.8	46230	47771.4	36986	42930.4	30511	42158.3	86935.7	115697	88314.2	84491.4	106186	47921.9	33429.1	18617.1	252195	31767.6	87452.1	23211.7	1000	12198	13451.4	23174.1	71546	45874.4	25700	20635.8	25082.4	43655.3	34111.1	82967.5	31115.8	41391.6	108957	43154.2
78.011@15.92	37725.3	1000	1000	69175.9	28073.2	38136.6	33224.3	24550.8	51157.5	33363.4	22440.1	66289.8	44262	57597	49812.1	37491.3	41493.1	74580.7	62541.2	38172.7	78363.3	136721	27867.6	49780.2	144320	109974	100073	290144	18434.4	104567	271536	43170.4	42098.5	15303.7	15727.4	14813.5	39663.5	71009.6	32656.6	21015.1	57683.8	41042.6	99322.4	36618.7	97448.9	114237	293745	88633.7	92962.4
78.998@5.17	143889	66232.6	114489	145490	114672	1.74137e+06	113417	119000	33854	143152	111663	1.75436e+06	112270	137199	109405	137612	102238	1732491	103930	1.76739e+06	142120	1.82566e+06	1802918	111834	1.77551e+06	102914	137418	97649.6	122245	89494.7	115063	87662.2	1.53388e+06	1.64885e+06	91688	124857	60543	130270	1.77943e+06	128057	1.66339e+06	131568	1.73063e+06	119300	1736417	89222.5	1.72052e+06	97044.3	1.7167e+06
78.998@4.68	115189	134894	1573915	133542	137447	123688	137262	136358	120804	128799	1.61526e+06	134931	126407	141479	118446	146754	124469	128705	121342	135984	127778	143445	120888	138804	138224	1.64284e+06	128681	112698	105394	119000	106011	113397	114068	131385	1.55362e+06	121876	128795	126076	133782	134499	119747	131537	130525	128683	142754	133636	131461	131850	122111
78.998@5.03	123826	129696	125328	131912	120730	138495	129632	1.75514e+06	123530	129586	117658	126476	122806	127801	1.62801e+06	130556	129975	137417	132264	135314	136126	128188	126092	118758	124433	126443	130740	108510	111245	109971	114204	113312	115599	124816	120966	140847	111904	137625	139876	121807	129368	135632	125547	125339	123041	121665	141182	127813	133821
78.998@4.87	132794	137360	123967	124015	140672	137124	1718514	137464	125435	1.81573e+06	118628	140053	138384	127989	129589	142654	126031	139479	1.69032e+06	136672	1.80007e+06	148239	142825	1.63939e+06	139364	130435	129694	1.41843e+06	116498	113131	120115	1.41071e+06	122802	134863	102827	1.68943e+06	1.58736e+06	138653	143215	1.741e+06	133445	132708	140314	1.71569e+06	134414	137695	124470	1.55623e+06	133688
79.018@1.05	1.02696e+06	989784	847771	967554	968776	1.03421e+06	949323	1.09149e+06	691223	808968	693861	841226	822724	658240	696108	925213	698315	808834	861475	605402	813709	778488	738854	666774	792113	857238	1.2826e+06	816807	978599	864627	1.09712e+06	837181	933154	1.23086e+06	850479	1499802	1.38249e+06	1.26957e+06	1.85662e+06	1.1293e+06	789265	1.1665e+06	936748	1.23221e+06	1.08274e+06	1.10727e+06	1.00459e+06	692958	1.254e+06
79.055@5.28	50226.4	98343.6	90171	61422.1	92365.6	13744.2	84589.8	97702.2	91306	91324.9	86980.1	91814	76597.9	88639.3	82363	20062.2	81760.8	57170.4	70458.8	37786.8	76275.9	69566.2	85621.4	76856.5	30931	73210	88049.8	60270	20418.6	15947.4	41112.3	50373.1	75666.3	70119.3	61349.2	129302	129491	127101	134190	139197	136196	189980	171953	191240	181035	126748	129504	120371	166319
80.008@0.27	1000	1000	1000	115377	52818.9	49902.1	1000	18551.8	35684.8	30149.8	16293.8	10690.3	11136.8	28640.2	25002.9	36433.4	1000	41110.5	1000	40667.9	42084.1	27047.6	12160	48666.8	27660.2	10339.9	42467.2	11495.8	47015.2	11350.4	32456.4	60004.8	53166.2	1000	1000	1000	62720.8	107723	84003.7	25817	22426.7	24198.8	10749.1	44226	29573.9	30032.9	60794.1	15313.2	51962.5
80.05@15.4	1.48373e+06	1.57642e+06	1.52685e+06	1.70908e+06	1.66753e+06	1.77662e+06	1.51865e+06	617034	1.68917e+06	1.32804e+06	1.53679e+06	1.66094e+06	1.79163e+06	1.72825e+06	1493302	1.1765e+06	1.56004e+06	1.72166e+06	1.54105e+06	1.61666e+06	970334	971345	1.78265e+06	1.74679e+06	1498320	1514434	1.57168e+06	1528426	1453998	1.46167e+06	1.07261e+06	906305	1.46189e+06	1719903	1.56747e+06	1.47784e+06	1.55803e+06	1.64713e+06	1.54914e+06	1548721	1.67576e+06	1.57506e+06	1.76262e+06	1688398	1.56668e+06	1.93894e+06	1.777e+06	1.04693e+06	1.76757e+06
80.05@15.51	1.59278e+06	1.67349e+06	1.25338e+06	1.50344e+06	1.69586e+06	1.82826e+06	959379	9627186	1.49773e+06	1.1988e+06	1.50702e+06	1.53592e+06	1.80387e+06	1.47056e+06	1.44102e+06	10841547	1.9655e+06	1.89502e+06	1549531	1.81749e+06	1.88843e+06	1.78918e+06	1.38442e+06	10117626	1.12669e+06	1.87041e+06	1.8817e+06	1599956	8611381	597270	1.14569e+06	1510355	1.48462e+06	10076858	1.81847e+06	579074	1.76434e+06	1.62219e+06	1.81574e+06	1.69266e+06	1.60892e+06	1.64194e+06	1.67358e+06	1.82152e+06	1.77011e+06	1816353	833992	1.80902e+06	1.71997e+06
80.05@15.64	1583044	1.53058e+06	1.67021e+06	1.77807e+06	10490256	330202	1.75185e+06	1813143	505045	515628	1.79147e+06	1.85516e+06	964912	1.94605e+06	1.74947e+06	1.84492e+06	1.38911e+06	1.79278e+06	10269321	1.8337e+06	1732515	855436	1.52529e+06	1.93917e+06	1.86007e+06	1.19942e+06	1.94978e+06	1.53583e+06	1.53048e+06	1.50287e+06	1.63064e+06	813726	1.07167e+06	1583192	1.71711e+06	1.80492e+06	1.75446e+06	1.10968e+06	809855	1.30538e+06	1.80297e+06	1.80887e+06	1.66324e+06	1814744	1.7257e+06	503420	10871532	863398	1880591
80.05@15.78	9772336	10180289	1.51198e+06	1905072	763358	10094852	922084	1.02087e+06	1.68164e+06	11045844	1.83561e+06	1.79646e+06	10956336	10541760	1.45494e+06	1.75793e+06	2.00016e+06	1.59486e+06	1.07419e+06	2.02059e+06	1.86921e+06	1.72497e+06	1.16275e+06	1.8498e+06	10783614	1.91842e+06	10656403	1652127	898073	8230662	1.55422e+06	8489956	7.98674e+06	1.36554e+06	1.81873e+06	1.25653e+06	1.86853e+06	2128070	10271876	1.99129e+06	1.55221e+06	1.57601e+06	1.2287e+06	1.59759e+06	10386205	375600	1.2492e+06	1122183	1.91385e+06
80.05@15.93	1.49448e+06	1686820	9845086	10521116	1690630	697961	10114458	1.14822e+06	10509440	1845148	10612671	10321476	890000	490517	10501941	1.67006e+06	1.64656e+06	10641122	1614057	10469148	10129471	10379011	10678937	1.1751e+06	1855072	1.73467e+06	1.74829e+06	8471802	708382	1.39561e+06	8825623	1.6028e+06	1.52705e+06	1.44356e+06	9561389	9512198	1.70816e+06	1.42936e+06	1.73536e+06	9801022	9942389	10671282	10529099	10933314	1.56503e+06	10952713	1.74158e+06	1.70259e+06	10840451
80.05@0.33	2.10051e+06	2.21095e+06	2.33799e+06	1.63854e+06	322260	1.24871e+06	2.10646e+06	2.26808e+06	2.21306e+06	2.3193e+06	2.36865e+06	2222068	2.48644e+06	2389483	2.37832e+06	2340882	2.24851e+06	2.55907e+06	2.39848e+06	2280760	2.31557e+06	2430473	2411220	2.31781e+06	1.97609e+06	2.43368e+06	2451983	1.81462e+06	1.74983e+06	1.30521e+06	2.0351e+06	2.05762e+06	1.954e+06	2371957	2.16336e+06	2.24829e+06	1.51396e+06	926632	1.01355e+06	2062353	2353578	2362060	2094550	2458840	2.2863e+06	2277295	2.33082e+06	2.4293e+06	2.32908e+06
80.948@15.51	62501.7	105789	614525	86404.3	136376	169414	101114	50716.9	97658	131401	87280	75138.9	205258	42629.3	145511	123210	1.19085e+06	177896	116436	76882.6	184393	175687	86686.8	166835	1.1959e+06	175180	1.16076e+06	186319	105653	183440	132643	204694	188149	538290	55527.6	135355	165499	102912	64788.8	114364	117780	54127.5	194488	155061	1.13941e+06	112736	214826	93219.1	49898.5
80.948@15.67	153390	837062	171353	111714	1.02937e+06	192935	1.05066e+06	994489	1.02389e+06	1.12625e+06	97273.9	1.15806e+06	1246928	1.16963e+06	121535	1.21853e+06	205147	189359	1.16646e+06	1.1547e+06	40477.7	103666	141582	120644	137965	72056.4	168963	188613	121621	1.31812e+06	1428492	199291	202867	432629	892757	93125.2	113931	192871	1.00928e+06	1.00222e+06	81820.9	100526	1.14223e+06	150169	203691	36050.2	1.21488e+06	106099	78418.8
80.948@15.88	108564	61619.2	181485	182057	26117.6	58039.6	178086	51345.4	71096.2	72093.6	1094205	73711.2	53295.3	49117.8	1.19646e+06	197877	103561	1.17936e+06	128951	176774	1.15247e+06	1.1442e+06	171186	117098	126696	1.18135e+06	79624.6	1.27476e+06	1.294e+06	194430	215798	1.40573e+06	1.38496e+06	189025	176364	1.00119e+06	1058604	1.0601e+06	122121	171551	1.00298e+06	999380	187572	1.16554e+06	54637.3	1.23465e+06	207290	1.12772e+06	1.19201e+06
80.948@1.26	48752.3	49754.8	54997.8	47034.2	65607.9	61369.9	54053.9	66665.9	59032.7	70877.1	81402.7	78797	90239.2	100085	81579.2	95565.7	104796	96530	110080	114139	112999	104457	108508	112255	108106	114536	110825	106676	120055	112051	95559.6	108058	118689	41666.8	31408	35390.6	53232.9	39762.8	53996.9	36725.7	51150.1	55904.5	53925.8	57734	51397.6	60171.6	69610.5	60965.2	65344.8
80.948@0.23	25853.2	25401.1	67112.7	43318	12128.8	10083.2	30560.7	52077.7	55281.2	41370.6	69898.1	45497.4	51830.8	33758.8	39559.5	49312.4	32874.2	61008.8	59453.2	59854.1	66459.8	44490.1	28225.8	42663.3	24129.5	23755.5	53622.7	112684	14059.1	26114.1	26823.3	45937.3	11391.4	61445.1	40442.1	76572.6	25157.6	36901.6	39456.8	56207.8	49032.5	56770.1	64661.2	72337.4	73241.9	1000	59465.3	59293.8	44641.4
81.015@1.05	46715.8	32055.4	33965.1	35654	37320.3	30692.4	28756.4	49859.9	27843.6	30199.6	26176.8	25350.4	28255.4	40610.3	23582	29533.9	42730	30399.9	30765.5	32149.8	30439.7	25386.3	30695.1	33037	24744.1	34353.1	49217.2	32496.5	31818.8	41633.2	29905.6	32617.1	31000.7	34906.9	39115.9	40618.8	31203.6	36866.4	52839.9	43081.8	31203	29843.4	36400	42591.6	32308.2	25049.5	24878.5	30932.2	29829.8
81.045@15.56	284306	514200	436793	645309	1.46872e+06	897060	3.53277e+06	489750	1.11356e+06	453020	1.16373e+06	1.12145e+06	662505	475434	516740	424375	660924	1.15517e+06	521196	1.48531e+06	716270	285030	790230	889459	373522	901130	916894	809801	1.35157e+06	615254	801798	718559	1.56482e+06	5.0733e+06	600683	518983	925451	1.04637e+06	993821	662558	724313	864923	714187	1.36211e+06	658141	1.22625e+06	1202649	287628	438981
81.045@15.84	6438220	488206	754144	765553	724117	1.28169e+06	1.47925e+06	510460	1.48786e+06	329124	421916	737241	464424	943985	826788	366000	1.0446e+06	454663	1.32058e+06	926075	946735	732658	1.37186e+06	759823	5129829	1402691	5528702	1.39674e+06	1.4135e+06	1.569e+06	987835	2941103	924165	582204	4612274	1.00798e+06	727425	1166398	1.25884e+06	896955	536253	1.42265e+06	877776	1.90363e+06	1.15856e+06	1.06667e+06	6069468	936599	6303127
81.045@16.03	3.03977e+06	9190188	9921235	8.26801e+06	6.74783e+06	6.35685e+06	3.69445e+06	9010835	9148657	4534409	4.64102e+06	9444410	9321715	10110248	10579311	9373606	7.52199e+06	11133439	8237244	7328255	9356998	3649512	10664669	8887943	5572002	11016125	3.36702e+06	9641207	5.49593e+06	12595295	9951682	6.17702e+06	12276935	4080599	3.78752e+06	9869168	6.36964e+06	5.9421e+06	5605900	9207179	8590343	8993787	5149197	8.21862e+06	5936202	8.12893e+06	4.7979e+06	10270910	4101753
81.045@0.19	398358	517546	699162	1.33902e+06	720568	1.41305e+06	1.68687e+06	440234	659066	428534	675402	736631	936052	655928	404632	975261	969700	380998	1.82364e+06	479450	673267	740001	782007	869728	890742	731160	581213	895423	1.48092e+06	2404242	783377	529445	1064387	342539	436842	433249	1.35748e+06	1.56971e+06	1.80368e+06	335006	414080	754254	662687	297123	669938	919988	363008	654573	891037
81.045@0.37	1250151	854129	806330	590222	2.91342e+06	3.835e+06	592103	522803	1.01336e+06	624836	1.08742e+06	786128	810293	888153	841542	818626	1.10498e+06	603816	886020	1220573	756115	650422	864759	781885	969185	855250	1.1511e+06	1.54367e+06	724086	1.05801e+06	779758	1.01534e+06	863809	718669	900275	1463839	677700	3341426	3.35422e+06	904399	589538	846396	994653	639933	809246	783151	744155	760094	882600
82.014@1.05	361263	397846	405870	394696	402360	407282	375808	398920	382156	392407	384476	374272	366507	368988	383666	351364	377351	380343	365450	375588	400795	378474	419498	382252	383259	388424	608142	379965	398395	412836	383061	405116	446241	651980	653033	658066	635468	675909	626966	643318	664214	624965	625288	645899	648562	618902	659304	625853	632944
82.053@16.08	8743828	8409417	10497414	10367335	10773244	10280344	7399734	7.86834e+06	8866760	10582360	10207580	8699591	10119853	13111256	9351546	10515000	11747426	10215287	10481946	8833262	8932216	9824550	12297226	11209262	13300888	12475413	15402063	17215612	18183432	16158102	18033232	10426461	19554590	10879865	10633070	11994039	9511173	11656662	12149351	7689625	8.05973e+06	9144772	9314065	9560995	10007295	9009051	9743401	9290873	13242433
82.053@0.2	482627	1.39554e+06	770248	847501	435957	1.46993e+06	1.70523e+06	813062	944730	943876	921118	920079	426144	860561	963921	1.24331e+06	1.237e+06	794502	1.23331e+06	850842	729496	1.23436e+06	926821	1.50586e+06	1.64947e+06	1.05386e+06	1.03031e+06	1.6979e+06	2.20295e+06	2820272	1.97777e+06	1366561	1.3437e+06	691949	762978	737162	436138	947424	1.09914e+06	869495	1.03065e+06	1.11561e+06	1157620	792755	916045	1.52204e+06	929234	934854	956498
82.538@1.05	1.04236e+06	1138825	1.12291e+06	1.02034e+06	1.09124e+06	1051897	1.01303e+06	1.05296e+06	1.0207e+06	1.0052e+06	996901	974981	995201	1.02278e+06	1.03217e+06	944077	1.05275e+06	991198	907347	938479	992951	891492	1.04194e+06	991923	1.00382e+06	1.01492e+06	1506213	1.0863e+06	1.18837e+06	1.22193e+06	1.14129e+06	1.23841e+06	1.31912e+06	1.80421e+06	1.83868e+06	1.82999e+06	1649582	1.69151e+06	1.65502e+06	1.67227e+06	1.81195e+06	1.6964e+06	1.68228e+06	1.65501e+06	1.67386e+06	1.63802e+06	1.75339e+06	1.71649e+06	1.71752e+06
83.061@15.99	21614214	18582592	19127330	22931774	22636904	24300154	23945548	24034100	25095986	1.77498e+06	24983398	24515644	24912486	1.43252e+06	27603040	3.22581e+06	2.7901e+06	25101062	1.06354e+06	25065584	25477506	27260030	2.06603e+06	26821100	3.9217e+06	2.53224e+06	27534484	2.57486e+06	26275164	28940258	28532380	2.03476e+06	27255676	18969384	19650738	2.6885e+06	23263124	24614162	23233312	24216108	23996126	8745132	26605484	1.69327e+06	25575284	25378560	25435362	24469552	3.03805e+06
83.061@15.33	2.43531e+06	1.03361e+06	1.08653e+06	871787	1.82451e+06	1.57872e+06	2.7851e+06	3.7839e+06	1.87684e+06	2.06227e+06	2.73783e+06	1.85982e+06	1.93097e+06	3265979	3.32868e+06	2.73295e+06	1.25967e+06	1.78215e+06	2.25892e+06	1.4173e+06	3.25504e+06	3.93482e+06	719987	1.56827e+06	4382221	1819591	951209	3.21759e+06	2.57428e+06	2.24226e+06	934548	2163620	2609164	325080	2.08583e+06	2.37194e+06	2.81432e+06	2.88045e+06	1.56009e+06	3.65861e+06	2.21909e+06	2199801	2671750	1.89119e+06	2030884	3.42329e+06	723799	3.43713e+06	1.75523e+06
83.061@15.45	1.70992e+06	1.63325e+06	491954	1.18491e+06	583858	3.499e+06	2.38058e+06	3.71035e+06	3974842	4318338	2.31141e+06	4.42757e+06	2.82463e+06	4031488	4.97741e+06	996457	24670122	1.30977e+06	3.22988e+06	711047	1954190	3286753	1.21912e+06	3.64364e+06	14051246	27549162	1738770	1.41079e+06	5212377	4.18087e+06	2.68305e+06	1.76898e+06	2.09902e+06	3066557	2.25295e+06	1.43312e+06	1.34099e+06	2844140	2.43448e+06	3.28342e+06	1.87868e+06	1.40283e+06	3.85861e+06	3816254	1166322	2.08432e+06	2.45269e+06	4090635	2627684
83.061@15.56	3470705	1.78916e+06	1.03601e+06	1.59194e+06	3837667	3.16316e+06	3.90381e+06	2.54573e+06	4093676	25430120	1.29889e+06	2576318	1.56751e+06	4.29318e+06	3.8532e+06	3.09741e+06	2.36376e+06	1.54613e+06	3.48506e+06	2.08751e+06	4.76209e+06	2.04189e+06	1.56299e+06	4.68082e+06	3.86152e+06	1163735	3.11418e+06	24975238	683824	1747088	2893976	3.31211e+06	3889227	2.67063e+06	888042	986565	2044664	3.6326e+06	1.97341e+06	1.72624e+06	1.81678e+06	4328823	1420397	3710219	1.27238e+06	4.52261e+06	3.26036e+06	1.83789e+06	1.3777e+06
83.061@15.73	1.90108e+06	1.16972e+06	3.36918e+06	4.10651e+06	937818	1.94746e+06	705775	4.51949e+06	3.46719e+06	4765705	3.497e+06	2.13191e+06	1.61974e+06	4.80423e+06	5.01847e+06	24797020	1.58097e+06	1575913	26095938	2.6861e+06	4055162	4987614	24593804	3.89258e+06	4539139	4.49209e+06	2.37335e+06	2450440	2.69801e+06	5203146	2696609	27509830	5196693	3.35938e+06	2515742	20717266	2737773	4.86179e+06	2.19621e+06	2.21638e+06	1.24433e+06	15947359	3.77342e+06	4.07168e+06	4437209	2382828	1.64833e+06	4719082	26589226
83.061@15.87	1.75415e+06	2.86781e+06	3.56256e+06	2846170	1.86849e+06	4.77276e+06	5323562	3261785	1699163	4.22719e+06	2.39775e+06	3.11791e+06	4632041	25593562	4.19951e+06	4021210	3.11178e+06	2636813	5062263	2540722	4278357	947831	2320153	4589753	5607758	2.20097e+06	5297444	2619154	1966809	1.82897e+06	4.62952e+06	3.95322e+06	5.15565e+06	1.57885e+06	2.75529e+06	1562301	947790	3.77214e+06	2.33286e+06	4480325	3.8819e+06	1.88597e+06	4770917	26055272	4.63521e+06	4.5704e+06	2.55574e+06	2.85423e+06	2.28717e+06
83.061@0.31	1.31599e+06	1.09978e+06	1.67124e+06	11293030	12187186	13633750	1.32552e+06	2582998	2.658e+06	745016	1.56764e+06	537734	2.66044e+06	1.01867e+06	987358	2.18669e+06	1.17534e+06	2.57535e+06	898749	1.3806e+06	919975	1.75698e+06	1.22671e+06	2.42851e+06	1.27216e+06	1.10717e+06	1.70429e+06	1.64316e+06	5428486	2699857	2.84581e+06	2.58475e+06	1.76797e+06	743729	1.55311e+06	778979	12494939	12136555	12939640	3.50452e+06	3.0219e+06	2.55784e+06	1.79725e+06	2496119	2.26367e+06	2.68337e+06	1.03546e+06	943660	3396035
83.061@0.19	985953	626408	952341	5541888	5.11987e+06	7173551	2659554	5.18034e+06	5.70836e+06	5.03558e+06	5171089	3099161	4987990	5.96208e+06	5349950	4.76147e+06	4.8173e+06	4.65094e+06	4.99886e+06	5.05399e+06	3.34747e+06	5.93232e+06	2.69915e+06	5419816	6474158	2765267	5568728	5.26244e+06	3.60516e+06	4.31223e+06	5181310	5.79472e+06	6.0379e+06	2860524	4.20589e+06	4.34321e+06	5916929	2.05486e+06	4.84311e+06	5.57591e+06	4.92903e+06	4874383	4522924	4.93114e+06	5.60235e+06	4751896	2.33437e+06	5.49461e+06	5.85614e+06
84.045@1.23	2.70989e+06	2.74301e+06	2.74066e+06	2.37979e+06	2.44532e+06	2399834	1.82513e+06	1.8429e+06	1773072	1.31222e+06	1.25784e+06	1.26985e+06	899645	906634	909393	647847	680693	618375	530317	513724	502436	399606	404570	402832	384424	408737	455153	551059	543643	451925	409132	371467	418065	2559420	2.56651e+06	2.58006e+06	2.24921e+06	2.31652e+06	2.30169e+06	1.91604e+06	1.96667e+06	1.9616e+06	1.68467e+06	1.69443e+06	1.68946e+06	1.30587e+06	1405776	1.29886e+06	1.05496e+06
84.045@1.93	239197	223688	223329	375766	385949	388090	441722	459122	475008	521470	551888	498238	563020	505894	552654	532397	554364	488106	500283	507857	570494	501584	568587	531755	538798	537287	553353	511154	584880	547760	493644	520010	560175	1.11661e+06	711590	679620	1340287	895206	1.38999e+06	931903	1.56646e+06	962820	1693163	1.05107e+06	1.07582e+06	1.14261e+06	1.13901e+06	1.11965e+06	1.23085e+06
84.045@2.03	243966	137935	230677	377865	398806	369571	492236	466541	499424	593561	510776	529047	572345	576657	557067	529400	502734	524215	562643	541622	568659	593293	549859	550477	518328	514108	524808	569031	588469	577988	572642	601530	634277	694522	1.17322e+06	1.12154e+06	819611	1.42017e+06	825077	1.51583e+06	981909	1547876	1.10965e+06	1.80143e+06	1.70252e+06	1.79618e+06	1.93055e+06	1.76838e+06	1.97467e+06
84.056@16.11	588115	556275	352626	468025	539708	241825	88359	569096	709197	1357558	537098	190731	218902	1.11764e+06	236331	1.03142e+06	1.22781e+06	635683	1.04706e+06	209971	387503	641649	2.03845e+06	321429	1.31185e+06	1158612	530217	1.6167e+06	197101	2.72563e+06	572385	622432	419180	616291	547867	1.29583e+06	569940	532887	233664	472141	435355	811244	1.15829e+06	962138	487286	457370	464818	477292	963518
84.081@1.09	1147240	1.23383e+06	1.17097e+06	1294334	1.30339e+06	1.2555e+06	1.15322e+06	1168693	1.20298e+06	1.11991e+06	1172586	1.16405e+06	1119704	1.16327e+06	1.09229e+06	926820	958997	874513	915535	926147	873693	893386	907631	919405	916145	908858	905443	881244	1.00935e+06	908367	866257	883597	966405	1.26368e+06	1.24308e+06	1.18163e+06	1.22058e+06	1262210	1.25636e+06	1.14297e+06	1.24262e+06	1.2257e+06	1.18182e+06	1.12913e+06	1191925	1.08088e+06	1.14306e+06	1.15659e+06	1.02367e+06
84.081@1.54	29702.5	92164.5	84212.7	32752.4	50968.7	16250.3	26821.1	58871.8	25107.8	61132.3	17793.4	59489.9	21944.8	55338.1	27009.6	55238.6	54441.7	57956.4	38168.7	56335.3	62632	56736.8	47179.6	61001.2	58918.8	10877.6	59598.5	38908	48315.7	47865.6	54060.4	52266.5	54523	159253	134974	215340	162486	163882	172800	93352.9	185826	142099	144949	102726	127999	106952	134315	116694	87957.2
84.96@1.06	1.15314e+06	1.02768e+06	1.07507e+06	1.1206e+06	1.11099e+06	1.03272e+06	973423	1.17131e+06	914731	954963	920170	913526	846426	819306	874110	1.0944e+06	926985	868330	1.11669e+06	858846	890929	902801	990291	898949	877967	1.16206e+06	1.95262e+06	805604	873000	1.10926e+06	827339	755224	867531	1275044	1.24432e+06	1.39651e+06	1373860	1250168	2.22877e+06	1.06559e+06	1.19324e+06	1.092e+06	940003	1146617	1.10335e+06	953430	1.03363e+06	979007	964781
84.96@5.08	9233084	8418085	712887	9120515	666612	8650307	671136	8769345	1000	9501404	655765	9280051	695406	8995699	1000	9745128	657924	9414977	664088	9597716	9526637	929907	9367018	665039	9646748	1000	9460448	707801	8487078	1000	9107121	566553	8512957	8.19087e+06	612161	854449	1000	8809375	8770381	8710612	765743	950722	8914547	8858348	8904200	647045	9024391	606755	8842858
84.96@4.93	796346	807408	7576379	845776	7.86752e+06	864130	8506554	925840	788568	915994	835568	1.00047e+06	8853293	892357	8.19502e+06	1.03001e+06	7986369	867655	8435890	966404	929719	10135144	871846	859881	959001	8367564	909819	7869462	776801	7275274	858466	7.36937e+06	861576	829139	7055274	8407825	7489415	828975	913188	926688	8.09618e+06	8710382	919645	917088	852747	956654	873773	7559499	923044
85.029@1.27	654678	631575	626692	621623	640096	645127	580047	603312	624498	483877	477586	472114	367442	389799	382860	302636	318027	296251	229422	246669	242159	181677	182228	199116	194175	179991	180936	177311	182439	196454	175192	184704	186904	671810	506722	541460	591081	433801	657554	582075	605878	615516	528810	557155	539857	464510	501126	481057	405665
85.04@16.06	3562209	2188261	2.89887e+06	3.26706e+06	2.65715e+06	3.82727e+06	1.73149e+06	3.45462e+06	2.25875e+06	3.90754e+06	3.79068e+06	3.06964e+06	2.8978e+06	3.88162e+06	2.24371e+06	2967202	2.46218e+06	2.46857e+06	3.55188e+06	3653904	3.22525e+06	2327914	2061295	4.0311e+06	3306567	2.00583e+06	3.23162e+06	1.37442e+06	3863996	2.02453e+06	3.21633e+06	2.80281e+06	2.49863e+06	3.07666e+06	2.66301e+06	2.3493e+06	3.01474e+06	2.39005e+06	2.33351e+06	3.37652e+06	3468479	2.45667e+06	3.79414e+06	3.32725e+06	3.09293e+06	3720194	3.43878e+06	3972766	3.11164e+06
85.04@0.37	239131	234058	205643	149960	311589	281385	287186	154669	244576	121984	259845	267655	156315	304950	301906	217711	362184	191977	256899	346930	307364	139351	303446	153848	396789	273732	302656	315626	176867	321876	178692	184603	159969	149880	249462	318852	165291	224448	295304	234783	114840	154956	231722	168314	280317	182925	349461	268181	285249
85.04@0.2	347778	325281	539858	409718	772990	1135473	718850	489255	353110	558253	464780	575858	298254	576831	560482	499132	702062	538630	587740	496699	380198	556607	584347	692555	811510	590790	416036	619585	778495	1.16536e+06	844074	512258	566405	208990	195198	328315	736596	820526	1.23738e+06	618403	493475	536096	354174	438972	473444	584124	353046	421263	595152
85.076@0.2	2.46495e+06	566469	2.50133e+06	5.73667e+06	6.21198e+06	6628941	3.3216e+06	2.90071e+06	3.00025e+06	2801340	2.91216e+06	2937019	2.80915e+06	1.77913e+06	3201719	2.55521e+06	2412515	2.69028e+06	2.66974e+06	2.77553e+06	3.16223e+06	3.39471e+06	969843	1712940	1.1975e+06	3.38454e+06	3.21702e+06	3.06457e+06	3.28076e+06	3.68526e+06	2.94262e+06	3.48362e+06	3.58529e+06	1.17308e+06	1.6643e+06	1.95514e+06	6.83333e+06	6.07204e+06	6954359	3.06627e+06	2551854	2.6716e+06	2.33149e+06	2.76471e+06	3.02238e+06	1.13645e+06	1590066	2750494	3299043
85.076@15.23	2.89229e+06	256373	362261	636216	667641	533015	680542	523405	659549	577954	916436	597631	507187	1.40905e+06	595016	852298	430513	2270297	473124	751126	817953	1.52792e+06	309198	1.57416e+06	749517	623437	1.31895e+06	819685	471074	1.05067e+06	2.24576e+06	771848	669320	763821	716097	407540	1.04752e+06	454239	658832	711329	1.04202e+06	736354	1.1291e+06	1.2939e+06	838178	692616	382309	1.23313e+06	524481
85.076@15.36	623739	3103714	394398	3.27333e+06	5286515	710189	611165	1.1083e+06	11140849	966676	1.23634e+06	1.16616e+06	6.22168e+06	720518	1.27128e+06	599897	5884147	1638829	4.3454e+06	721079	1.93576e+06	2174668	3.29114e+06	1.52864e+06	1.72151e+06	1.16505e+06	640938	1.59814e+06	624174	1.11079e+06	644970	3759005	6.3279e+06	561023	4449486	537635	2.83507e+06	572310	354333	1.11827e+06	1.09194e+06	5.02882e+06	2.06958e+06	1.44682e+06	5.47787e+06	1.54102e+06	1.02894e+06	594176	5500526
85.076@15.47	1.25389e+06	419644	5.45807e+06	1.27451e+06	637108	1.46135e+06	611165	1.80239e+06	1.38549e+06	1.248e+06	1.17983e+06	824464	861545	1.90053e+06	2.04761e+06	1496428	718061	596123	4681274	1.70415e+06	2.43949e+06	1.344e+06	812533	1.14337e+06	9195371	6823213	1.34582e+06	961106	6928028	1912876	1.31726e+06	1.04539e+06	980690	3646409	746510	759836	872978	5852494	1.07253e+06	1.6974e+06	710944	586954	2.44079e+06	853203	609061	1148488	942989	1.4572e+06	1.23602e+06
85.076@15.6	934646	1.0151e+06	402324	1.24498e+06	3.7427e+06	1.38054e+06	454706	1.57547e+06	1.16082e+06	1.64206e+06	683559	1.96482e+06	887676	1.80719e+06	2.56625e+06	583396	1.13648e+06	1519364	1.34487e+06	811212	1680527	624857	1.22906e+06	1.32092e+06	2.8264e+06	1.9655e+06	1.67043e+06	755170	708440	1664629	2.38149e+06	1.37166e+06	747397	1.0048e+06	485729	212136	1.42676e+06	1.60524e+06	538229	8.22969e+06	556415	1.92305e+06	1.2056e+06	1.51203e+06	1.13865e+06	732197	10282248	1.33542e+06	1555743
85.076@15.73	825412	413197	458919	3592317	463472	905913	1607384	1714066	2.01505e+06	10580309	1.78232e+06	1.18143e+06	892126	2638956	894800	1180259	839656	853296	1.36844e+06	1036559	2.28785e+06	2.89681e+06	566447	1.26938e+06	2.27367e+06	2.02507e+06	1.36286e+06	15417640	708440	1.7246e+06	1.02797e+06	2.35139e+06	2.01427e+06	592248	841906	586868	1.19966e+06	3.4078e+06	664295	1396467	1.82037e+06	3.38891e+06	1.95897e+06	2.2104e+06	2.19912e+06	695882	1.0925e+06	1.82142e+06	5147709
85.076@15.03	293291	157149	124780	205235	199440	539089	523336	498320	411894	217466	679309	562710	525310	295345	286106	229516	394034	212156	455917	293678	384895	679474	223029	597326	197224	483771	1046828	243861	335522	165092	2.82848e+06	454117	181652	98679.6	377590	221152	225588	194264	233782	281014	273967	284562	493902	169636	699362	331796	364141	427238	301820
85.076@15.97	1.61656e+06	730978	459733	522001	1.83587e+06	699462	452807	525366	1940757	865501	13699572	438385	592290	1.26384e+06	1.17479e+06	816862	1.26944e+06	1.16637e+06	3654975	450366	2.70053e+06	1.87991e+06	302122	1.77471e+06	1.04334e+06	1.38099e+06	16483374	1.42854e+06	1.20812e+06	3.10801e+06	12619728	1.39506e+06	1.44311e+06	149699	438624	280433	917773	727949	1.0747e+06	2.0454e+06	933635	1.0849e+06	2121029	835447	883885	630060	1.65358e+06	1.24054e+06	2.11219e+06
85.076@14.91	370487	55982.6	146317	111940	131797	176911	243044	267351	314769	297373	485465	487682	139936	448193	103893	207593	236958	614598	310807	185348	1.97668e+06	391763	417906	308017	163429	212432	749221	374762	367776	349968	314314	2.04209e+06	442898	232376	110925	154252	94129.4	344730	123299	305861	170358	91291.2	353032	244225	275088	265993	313841	234267	619180
85.077@14.76	106859	109673	66208.3	820079	113523	147496	187136	411680	209108	204713	283692	142885	1491234	361848	155997	189408	236421	119700	108611	404303	390821	232757	346358	136255	400063	1.90326e+06	500951	205945	277205	312622	169391	486691	388336	213646	49705.3	95291	898957	264091	66544.6	292341	1.2827e+06	183872	261342	476022	387252	411617	87096.6	262176	152606
85.077@14.57	141035	35835.2	54408.8	194765	137942	78193.8	224885	110688	203029	236957	301331	339655	328128	291876	372928	125322	216863	377806	232152	940761	71338.6	241838	210109	277191	278039	422228	164137	89293.8	98303.4	401919	317291	125214	652982	172521	88626.9	260258	233405	126382	52401.2	141699	188802	147560	198303	130985	77138.9	178233	237780	207994	162551
85.077@14.39	60738.5	89840.9	116579	240765	66059.6	111660	229021	221970	492708	179107	178915	104439	180899	193953	90745.6	214697	112335	528459	159618	112491	146224	369327	818748	298270	183693	239795	230611	119509	62858.3	615227	184583	191101	103682	155261	75545.4	147803	97495.9	123528	21940.2	162529	141582	81339	118059	242397	154385	331868	292347	192982	102455
85.077@13.62	1000	1000	1000	10133	13338.6	13857.7	18972.4	43923.7	21623.2	19393.1	22722.2	24286	28150.2	1000	20331.4	30747.1	13551.8	17484.1	29118.4	30665	117519	50930.3	40904.9	39370.7	17451.8	40733.1	49341.8	15092.6	13992.5	10622.1	1000	29354.4	15417.2	1000	1000	13963.8	12264.4	23674.6	1000	1000	13312.9	36852.6	66917.3	23940.4	17678	25705.1	20558	21222.8	27341.9
85.077@13.77	1000	13643.5	1000	36839.6	19203.3	18082.7	26248.4	118686	193764	25077.9	51936.3	41627.5	40962.8	32823.3	58609.4	156245	24931.8	22181.9	27855	37995.6	204210	121990	73118	36640.5	60597.1	103639	29782.5	29831.2	38646.3	145732	40404.7	43458.4	72631.3	13835.8	24213.3	1000	18649.1	53001.3	1000	26857.6	34016.5	43121.9	57258.5	70124.6	143295	28464.3	18401.2	29948.9	157373
85.077@13.46	10339.2	1000	10831.4	10405.3	1000	1000	10545.1	23496	13735.8	1000	14694.1	14178.4	15595.3	1000	11421.7	27500.1	13219	11932.3	1000	15257.8	17936	13022.1	20538	17803.8	48302.4	28659.2	1000	1000	1000	1000	1000	1000	13637.6	1000	1000	10275.2	15470.3	13820.9	11734.4	16926.6	15389.5	19446.9	16009.6	18825.3	11105.3	22376.4	1000	15225	16497.7
85.077@13.93	22999.3	10659.8	44871.5	54890.3	49207.3	64345.1	118242	24018.9	42567.8	52411.5	82650.6	251712	53696.5	51037.4	34619.7	99446.9	84517.9	39034.7	136750	117610	60638.7	78873.4	60054.1	88216.3	61207.5	48927.4	152909	48505.8	20028.7	32114.2	104703	190597	29154.7	17707.3	23972.4	11191	33149.1	59358	32916.7	56620.1	171378	203596	176440	44452.1	29165	77474.2	53622.9	42752.9	42576.2
85.077@14.09	35464.8	10258.8	42950	156988	69698.3	36278.1	82778.3	36797	75855.9	96795.6	105019	140201	55784.4	193301	148323	185076	56711.2	56790.6	205902	143741	133144	205665	47746	224621	169461	179369	73171.7	60580.1	37095.1	60539.8	61160.2	36112.1	40088.2	17861.7	50258.7	34752.8	43744	77740.2	123191	60587.8	110770	57895.2	47472.2	192918	61985.1	158348	124429	97964.1	103186
86.036@0.16	44892.8	49492.9	60770.9	27007.8	40558.1	41758.4	30355.6	36000.1	46701	55591.3	50764	43599.4	47245.8	29526.9	56522.5	48484.9	41638.1	42409.7	23331.4	35371.2	22782.4	44647.9	18150.8	25814	23784.9	27917.7	34565.2	39908.8	24970.3	63759.8	39002.9	38850.3	34372	23272.8	22316.6	54272.3	35006.6	39917.1	54739	42325.5	40300.5	53239.6	26998.8	39032.5	30120.2	38122.4	43911.3	20365.2	28415.1
86.061@1.23	702913	708695	701790	683837	922768	684308	940866	934696	941281	900000	975318	939089	967392	882765	922780	839336	868672	897666	902496	877267	998736	1.02402e+06	824358	830903	907741	801302	842654	947298	863005	917214	814207	867312	811588	653043	657080	660922	642251	633637	643330	822453	848747	645522	803556	839484	899776	931423	1.04704e+06	863104	838977
86.061@2.61	193912	188202	182425	157425	182338	171205	178205	167427	153578	159566	165850	164206	143566	149882	139979	150828	154535	132633	153560	134481	132554	148939	132584	130682	128608	133314	141042	153297	144281	124916	132162	116035	123274	244934	264912	238968	269166	276868	263144	278711	267280	262996	255894	270128	238878	243163	277537	258517	259848
86.084@0.2	38412.3	86923.4	50719.8	149024	140186	195485	68799.9	122888	119462	83739.7	83220.5	78284.3	89553.7	130916	98429	77638.1	64290.7	78980.8	83021.3	99593.9	112256	117434	47802.3	108124	53509.4	73570.7	109314	59075.6	31459.2	62007.2	54746.2	79211	86032.1	19833.2	49870.5	56560.9	151309	198279	156712	80370.7	68494.1	59172.9	47991.2	131111	67917.2	57358.7	76575.4	116332	55972.1
86.097@2.29	1000	1000	1000	1000	1000	1000	1000	1000	1000	1000	1000	1000	1000	11637080	1000	1000	1000	12482834	1000	1000	1000	1000	11284783	1000	1000	1000	1000	1000	1000	1000	1000	1000	1000	1000	1000	1000	1000	1000	1000	1000	1000	1000	1000	1000	1000	1000	1000	1000	1000
86.097@2.17	63175936	66824108	67856190	63206904	67428100	66797324	61562996	64581972	63948292	62105100	63635570	63463230	59759080	60823544	61486412	56202130	59018344	58525308	55921344	57880784	59170476	56892916	59165550	59111212	57496748	58385684	59702504	56690676	57915384	58105972	54293730	57610892	59274856	73644664	76170670	76879620	73635580	78363210	78417000	73112590	76699720	77017600	72184280	76622630	74844420	71385900	75027896	72365976	70090910
86.097@1.55	30902.8	46749.9	32941.5	35545.7	23689.5	1000	1000	13003.3	10938.6	14450.3	1000	1000	12011.6	1000	1000	11720.9	11135.1	10499.1	1000	1000	1000	1000	1000	10939	1000	1000	1000	1000	12538.9	1000	1000	1000	10882.2	138614	142231	129818	111180	115761	108791	101682	105323	94558.7	84947.7	91573	78549.9	65285	78333.3	56775.4	44634.8
86.993@1.06	334379	332624	343810	342828	359748	349709	356562	373608	348713	354746	352566	347602	338352	340424	369022	343308	352851	340239	335122	372655	359894	348995	381528	356923	369609	371368	571795	396667	383204	386343	381679	393174	407992	599880	581113	580038	594116	616669	600336	620259	633260	607231	604915	621663	604430	620787	637153	606735	602657
86.993@5.12	86822.5	958646	845055	89042.6	70395.7	949114	80255.3	967280	73298.6	79407.2	64859.1	51233.3	81818.4	92923.4	55846.1	1.04158e+06	40482.8	1.02431e+06	71586.1	91525.8	88853.3	41876.5	1.0291e+06	76993.3	93798.7	75433.6	81721.5	90480.2	1328617	86653.4	1.47923e+06	95318.6	1.39281e+06	77042.8	22388.5	77279.9	67884.3	79398.7	957819	16565.1	76076.9	977022	967075	976292	961994	69518	83401.2	68395.2	69860.3
86.993@4.78	1.02217e+06	23135.6	85202.6	60080.8	87738	79854.1	81040.1	86931.9	75153.4	1.02901e+06	897256	88111.5	82334.9	1018815	932473	93423.5	905302	26105.4	85426.4	1.01033e+06	55815	1.05042e+06	87844.4	881030	93595.6	91157.2	89346.7	1234625	113244	118832	119439	1.24345e+06	116107	900686	834460	64221.3	64999.6	955434	84364.3	83771.6	849288	77706.2	89687.6	87334.7	86682.3	979966	88285.3	84895.5	82447.7
86.993@4.96	83228.9	74622.1	76322.9	1.01144e+06	77949.3	86642.1	918659	78176.2	876718	87167.5	77424.8	979117	1.0025e+06	92531.7	91570.2	84380.3	86687.5	61648.4	88622.8	83082.4	1.03519e+06	92778.8	86103.1	79238.6	1.05516e+06	912406	85678.2	110848	117074	101794	114072	123515	124575	81125.7	78971.2	86060.2	78517.6	83640.1	85755.8	953856	86759.6	90710.2	82633.3	79039.5	80238.9	81184	984454	872038	991244
87.027@1.55	91666.1	94546.2	93715.5	89527	94148.5	97587.9	86240.3	93263.7	86978.1	89417.4	85738	87934.7	80540.4	78807	83766.3	67114.4	69115.2	69076.9	63595.8	63394.7	60968.8	57296.8	64410.1	61523.5	58112.3	60482.9	63895	60759.9	63276.3	59219.5	58306.3	62012	64016.8	88468.6	94580.2	94876.8	86127.8	95886.8	88784.7	81137	96714.9	99336	84900.7	88141.9	90777.6	80066.8	91605.6	83653.6	81476
87.046@14.66	1000	1000	18559.9	25303.2	46185.2	38025.6	45346.3	53171.6	56037.2	46216.1	23686.6	16189.2	19233.6	12634	53746.3	46703.1	17095	30784.3	48127.2	49310.7	30596.7	27100.5	43908.7	10943.6	57301.2	59855.9	45780.8	45945.9	49584.8	48670.1	22955.3	41125.2	10330.8	1000	25541.7	19667.3	54192.4	22108	25856.4	44095.3	19719.3	32096.2	27657.2	27478.3	26723.9	29451.1	18772.5	1000	26410.9
87.054@1.22	950593	928520	913011	868318	942238	848341	903154	880993	872175	832366	798222	835677	662940	664663	667362	485311	482476	456430	333947	318363	322695	227524	215206	218286	241056	183045	200676	166860	164477	161255	146210	147539	138587	896740	884851	870206	891051	825393	814554	837238	842345	788428	836620	830635	838318	766737	750582	719493	554040
87.056@0.18	96342.1	39976.9	86184.3	166518	69170.1	78923.7	42270	65344.7	62509.9	91063.3	91079.7	81555.4	66341.6	89480.6	69867.5	69476	34954.8	25492.9	56339.8	37410.1	61700.6	76011.4	53908.1	31808.6	40613	34223.1	36796.4	36354.2	36431	87558.1	32792.6	32470.6	19890.2	31494.6	13329.3	79200.4	100053	99087.4	38575.7	96772.7	40491.8	37752.7	36517.7	46710.1	63368.4	66785.9	74461.6	52694.8	20441.6
87.092@0.18	711480	270860	249266	448454	561040	499720	382701	421717	457152	503829	257444	448094	252179	595850	211282	524385	233858	242340	407691	611444	666865	666805	522529	536498	557535	401175	327289	660469	665375	573845	625112	806466	573892	78542.2	97333.9	159858	550651	467273	594776	479306	237845	423759	411463	628125	525192	245064	592176	466891	791275
87.092@15.33	153255	55748.4	68072.9	112130	709671	145586	860718	1.2686e+06	1300552	107236	1.11895e+06	178330	274749	1263225	197465	271691	1.78751e+06	1.10763e+06	185221	1.13632e+06	218822	313281	916827	219528	345980	408380	358277	144828	167256	161289	231464	248847	1.27634e+06	257460	320103	53369.8	66323.2	431813	489373	1.37677e+06	1.16148e+06	813243	377819	1.80714e+06	1.86739e+06	144270	318361	1.87509e+06	578132
87.092@15.21	91811.5	54414.6	41339.6	288934	492424	378004	218640	928782	253714	1.10858e+06	244059	706930	111066	273077	197465	507980	296427	328258	185221	130632	389167	2.04014e+06	137310	2.0041e+06	804322	712611	1.62157e+06	202787	364355	259515	977484	203890	472837	83984.7	225725	181307	66323.2	506402	96320.7	102201	237767	250445	229438	114240	341538	88503.4	761198	340408	1.33912e+06
87.092@15.53	207515	202443	161050	236681	94093.3	453067	85451.3	323399	725690	1.01837e+06	624437	355592	1.84283e+06	551607	468362	1.5657e+06	239879	351912	2.07952e+06	710194	2957946	617530	554250	160243	1.30509e+06	1096553	1.00578e+06	285241	609605	1.45661e+06	3.33729e+06	252683	243476	263019	101908	688322	1.84198e+06	1.17293e+06	664785	1.14752e+06	631906	317083	252805	631370	388275	353865	233456	118425	323897
87.092@15.7	123063	217892	312430	1.60428e+06	1.03954e+06	190150	110553	341307	400213	950452	890573	2.60997e+06	409112	155513	214118	626194	149953	170433	491016	293764	309647	3.00769e+06	489701	160243	2.37983e+06	279745	916149	4551549	961809	1.09329e+06	438770	3.39581e+06	236657	180682	147716	272949	307974	461770	148509	249297	340434	880981	2.57677e+06	330116	177957	200203	615974	1.35682e+06	2.81926e+06
87.092@15.86	423206	263571	85302.1	450323	207073	143949	1.54727e+06	279017	153331	499222	478568	456551	1.07036e+06	465927	4440266	510188	623421	335197	1.38933e+06	2.07588e+06	444490	457661	195188	258365	626643	734936	168515	522294	712357	305298	464712	396748	249813	65299.6	67824.9	47651.2	403523	265743	552369	749860	1.01873e+06	116988	192818	2.07553e+06	271073	332397	219268	307889	744543
87.092@14.98	123832	14903.4	65023	247955	36038.5	80767.9	50632.3	98940.3	101060	153989	359383	164031	267155	221454	108228	49508.6	49663.3	214852	117135	140791	443847	249033	165505	74656.1	109403	260505	324893	86633.6	235690	464299	49744	384655	246491	11844.7	38810	131827	166379	172318	26702.7	112483	54267	254713	147786	107868	124989	163947	130275	102218	234232
87.092@15.96	126250	57299.5	69046.9	131589	230282	213552	310134	239349	159304	351304	418417	648269	147379	224287	422436	313605	217828	299000	738952	237141	238299	593637	77384.8	325292	462546	814260	214135	346886	563507	466560	774083	233112	306236	51208.9	69257.7	86902.5	203299	328952	234905	206032	196871	120875	920589	238060	423355	291592	219268	348618	772117
87.092@14.88	18376.5	14903.4	44609	32999.5	25562.4	26009.6	165332	50454.7	75804.9	78104.6	90464.4	102674	35395.5	103381	54062.4	172151	77921.9	205080	54300.8	65583.6	121066	49031.7	55651.7	72792.2	60094.8	167555	149914	93569.9	124628	96217.7	53319.8	78132.1	147793	10966.5	28314.6	41559.8	30946.7	70533.9	28712	61442.9	54301.3	16984.4	193043	63233	72843.2	94570.1	47218	35851.6	112090
87.092@14.76	18376.5	14515.1	18153.8	58589.5	31266.4	60792.1	128517	62183.1	64578.1	65872	70913.5	66107.6	236354	48437.5	54062.4	51041	43446.3	22706.5	299740	68451.7	51319.1	60758.2	68477.3	74035.3	60094.8	319984	46003.4	121065	160829	74109.6	64057.9	27928	24043	14089.7	22247	24474.7	46413.7	44017.2	1000	72360	192253	219701	405647	74420.2	56779.8	92316.3	98472	405055	62630.6
87.092@14.61	14880.5	1000	17673.5	21644.3	20604.1	22143.1	26100.8	29562.6	26637.9	29223.9	64458.2	36517	64690	48278.6	50591.2	77064	59009.2	87232.9	27881.7	44089.4	46118.3	55924.5	15380.5	28685.6	199686	43113.6	27675.2	48765.6	183977	85420.3	19221.5	19058.7	70023.3	1000	24970.3	1000	84194.6	24553.3	1000	17439.6	56518.2	26729.9	44847.3	16982.3	20560.8	68636.1	27327	109509	48049.9
87.092@14.45	1000	1000	1000	42976	19374.4	22509.7	33069	102609	23180.1	43773	110730	154813	34364.7	131113	39280.3	98712.2	18380	33959.6	31616.6	50122.7	21739.1	66601.3	22183	85369.6	35370.4	29554.6	53324.5	104042	20914.5	73167.2	96936.2	111882	101293	1000	1000	27793.8	13357.7	1000	1000	29762.4	18465.5	26670.7	35126.4	26222.5	51845.4	35246.7	55465.4	56849.9	27318.1
87.092@14.34	1000	1000	1000	20408.7	13220.8	13474.7	22876.2	33861.8	18054.6	24484.4	16692.9	15842.9	13724.6	27263.6	29786.1	58860.5	44924.2	85970.5	74618.7	12720.2	18097.9	19445.3	45614.5	44108.1	15467	53966.8	21296.2	39886.1	25671.6	24071.4	39223.2	14570.7	16695.6	1000	1000	1000	14370.6	1000	1000	13837.4	13041.4	20037.9	49521.3	12216	25235.8	46872.6	38978	40571.6	57082.3
87.092@0.32	11198.1	24402.1	31406.3	174531	90849.1	139971	117665	33801.1	108912	41225.3	114067	29484.9	49813.2	144862	65343.2	54590.2	49106.5	128541	202185	48131.7	61590.3	50116.7	50805.8	107573	146096	125604	115460	147305	106507	91177.1	109374	146163	83109.6	10390.3	13154.3	19726.8	227448	89572.6	87551.9	70286.2	95567.6	126823	43762.9	36715.3	144353	59434.8	85564.5	105161	79079.8
88.024@1.05	497568	281030	393584	320212	228028	285556	324533	266856	266722	338110	406025	366816	558113	494100	359784	529286	345412	304944	389505	471747	364038	414249	361210	398309	570125	512666	723536	573109	572519	387919	519490	510399	463727	481625	272684	366653	323789	347531	493727	222283	490888	298582	374132	476272	494369	546848	493586	403504	515981
88.04@1.22	902796	912259	814555	860200	866132	865157	808009	738736	767001	755770	686888	686754	611730	596717	616488	511629	467094	465569	382336	379914	377968	308865	315433	320478	333313	324284	341795	372863	354640	363142	385701	376576	406025	833111	899189	833196	858544	810501	884425	802638	828258	759223	734248	767472	731294	662865	655485	650301	561078
88.076@0.54	287283	292125	275689	249106	249697	253414	257879	242151	225191	230460	246376	223068	223980	219963	212260	229837	227129	231375	199294	208580	204679	211560	202039	198851	210937	211813	211331	205837	209012	202312	196840	191616	202070	277636	264845	258574	227161	255028	248066	237638	236187	241625	219112	227764	225323	221225	225848	230473	202946
88.076@0.34	54356	96906.8	227606	166200	1127704	1.10635e+06	232744	207700	208084	227328	136055	215128	213779	204490	145768	78171.7	207409	983626	140164	209143	208602	960320	34190.1	69257.2	203129	125960	126363	200124	102232	143001	221537	71314.7	80867.4	226390	168939	86453.2	247871	205980	57723.3	193129	232403	148609	215898	133500	224126	60033	138663	204912	142789
88.51@0.33	154085	135893	106694	89995.4	144008	59640.5	66633.4	110534	74283.4	52979.3	62958	53805.5	110462	59092.8	66819.2	79254.3	82511.7	88368.1	72545.2	62919.1	48860.9	67242.9	48335.2	57229.7	78061.4	78216.4	101202	28886.3	36087.6	44497.1	32489.9	37729.8	41861.1	96661.4	87763.9	128846	94181.2	114195	66491.1	99776.4	94536.9	85910.5	67882	44534.8	50820.1	39155.8	15900.5	98924.8	95027.5
88.516@2	1000	1000	1000	11591.7	11056.5	32314.8	29704.9	40658.2	41283.1	51170.8	50856	50135	49925.7	15548.9	48380.2	51250	48701.1	53754.6	50567.5	53489.8	48633.5	49691	51702	18852.1	52371	20554	54878.7	44465.4	48723	17508.6	38230.5	20236.8	25121.5	15139.1	55054.2	49283.3	68654.2	14060.9	70285	72743	69632	80028.3	85878.7	77817.5	84023.4	85197.1	89993.3	95075.1	92270.7
88.953@5.08	243963	204603	21856.5	1000	224036	1000	22423.3	23934.9	11799.4	28828.8	10829.7	275410	20665.8	214594	22478.6	290764	1000	261350	15729.6	28115.5	29827.1	28190.5	30577.2	13733.1	280714	19693.5	260858	21820.3	26734.2	19594.1	29303.4	21123.7	29058.8	1000	12183.5	189982	19787.1	13396.4	20417.7	14964	1000	23047.9	11643	24512	15865.9	23480.8	12449.2	15817	220754
88.953@4.88	22585.9	24290	181491	24755.7	13790.8	230441	235889	17848.1	206639	265628	15054.4	27280.2	262509	1000	228300	28385.7	19371.2	29188.7	232541	289969	30056	29816.7	28020.5	28202.7	22861.8	230667	22436.9	221076	217975	25789.6	286382	24623.1	29225	209904	12164.8	23417.7	26109.6	28760.6	21938.8	26922.5	28711.3	19570.6	22626.6	27925.7	1000	258735	29832.8	227414	27066.7
88.955@1.06	33663.8	39569	40307.7	33255.8	32685.9	28627.4	23519	30477.1	24126.1	26006	48014.1	23103.1	23201.5	22344	23028.2	27479.3	22555.9	25076.4	31760.2	21073.8	26153.7	25365.1	23838.4	62870.8	26328.2	38963.8	54591.2	43041.8	28135.2	39527.9	24300.4	23972.2	28621.1	32618.4	63897	45359	71265.3	36880.1	66630.7	29443.5	42845.8	62831.7	28898.5	33821.3	35165.5	23297.2	26881.2	43811.1	28186
89.009@0.32	98562.6	127168	1000	70188.9	36582.9	80305.6	61033.2	79701.1	63704.6	61859.9	72424.1	74582.9	92753.7	66755.2	78432.7	78561.5	89140.5	100466	79448	73562	67941.5	40230.3	75670.1	69895.1	77009.4	93517.5	34233.6	32224.7	57427.1	60245.6	57457	63045.3	68925.5	101800	82844.1	110906	88292.6	19718.6	19451.3	37283.3	80576.3	79468.4	57862	61377.7	35587.8	85826.5	60918.5	43701.7	97630.9
89.06@14.68	1000	1000	10881.3	17599.1	48493.9	19836.8	38786.8	24011.8	13670.7	33368.4	19330.9	170076	38793.2	153621	41030.2	31039.2	178061	28224	36193	33124	42557.4	160495	158729	212838	29743	182002	188955	12093.2	130364	15198.2	31578.7	15095.6	134907	1000	1000	1000	25176.7	10169.3	1000	36063.5	16455.9	26612.9	158224	18690.1	33139.2	24012.2	21989.2	26585	21799
89.06@11.2	11415.5	17416.2	13051.1	15454.6	13121.1	12590.3	1000	1000	1000	14974.2	13200.5	1000	15983.1	16273.4	17400.1	16517.5	16992.3	1000	1000	12980.8	16331.7	15955.7	15452.7	13327.6	18329.5	18609.2	20258.4	22857.8	21668.1	20204.6	24971.6	19758.7	22005	1000	10123.2	1000	12764.6	1000	1000	19727.3	12214.8	16144.7	15053.5	15324.9	15498.8	18909.2	19150.6	20828.3	16159.7
89.507@15.44	87990.3	45948.3	50311	23464.9	40432.3	1000	18698.1	23841.9	32103.4	1000	21983.5	12944.5	14104.3	24122.8	14718.3	33856.6	26023.9	22974.2	1000	66547.9	10488.7	12316	22652.1	19860.6	34898.7	41167.3	139847	66248.4	74972.6	20338.9	22577.6	14741.1	30175.6	29891.9	329089	57174	28731.8	16666	34157.4	1000	12082.9	42545.3	15825.6	41151.4	30176.6	11809.5	29542	13350.7	33429.1
89.507@13.56	98858.2	169035	62182.4	169448	134764	157473	132981	79352.6	141963	93310.2	92049.9	115393	56184.2	97602.2	64961.6	108535	142830	36118.5	110995	95626.3	94438.2	76190.9	45864.6	63235.8	111305	62433.4	100291	48816.6	115321	51968.9	108051	53056.8	110986	102679	127346	158319	47579.9	82947	168708	118128	36941.2	56719.9	109970	117949	82237.7	117197	124423	71850.9	138851
89.507@13.32	177556	150952	51735.2	179570	172338	67977	148615	110896	175843	63122.1	154006	120976	142575	130540	59153.7	123192	77571.7	128285	128906	130760	137491	53308.8	120854	118738	62816.8	94803.7	52875.7	133200	71798	72992	126016	130647	103263	114528	86471.4	102056	190979	904233	130411	154956	119904	169295	138017	941535	132697	140614	60297.7	162688	81315.6
89.507@13.18	1.16685e+06	1.08333e+06	948050	851934	1.00667e+06	912794	943855	1.07665e+06	734731	751840	845608	705518	822957	927985	567447	811034	857100	855482	709780	727436	854376	736887	128019	812824	699448	569950	670332	757894	725818	144182	726981	693622	133814	1.04807e+06	1.08967e+06	748424	1.08034e+06	198560	1.10567e+06	942048	178018	941441	793306	149884	915123	817236	824964	826009	673156
89.507@0.33	2.34141e+06	2957202	2766411	1498609	2.26995e+06	2.27121e+06	2126897	2.1633e+06	1.29898e+06	1.02656e+06	63344.6	1.57878e+06	2.16169e+06	1.22943e+06	1.73262e+06	1.518e+06	1.71741e+06	1.86002e+06	1.48175e+06	995936	1.06795e+06	54457.8	1.05076e+06	1.11915e+06	1.22853e+06	1484692	1.5173e+06	598462	632375	747885	607297	887815	838237	2.14076e+06	3158756	2.20275e+06	1.86698e+06	990590	1.7885e+06	1.74661e+06	1.90471e+06	1.4507e+06	1.12627e+06	982196	1055172	1.58161e+06	326307	2.01765e+06	1.62768e+06
89.507@0.21	962687	341634	198878	149541	903208	625613	48339.2	194000	433059	63780.2	83229.1	48887.7	236230	52493.9	53499.3	80627.2	72984.4	101604	79050.6	37838.3	102046	36004.7	25720.3	1000	55234.9	59954.3	61977.3	54914	21519.7	37737.9	18945.1	42375.3	32786.8	81605.6	330214	373417	193867	273207	312342	182325	55769.8	37675.1	39271.6	105323	25381.1	60218.9	127518	65652.5	51294.2
89.545@1.05	1000	1000	1000	1000	1000	1000	1000	1000	1000	1000	1000	1000	1000	1000	1000	1000	1000	1000	1000	1000	1000	1000	1000	1000	1000	1000	1000	1000	1000	1000	1000	1000	1000	1000	1000	1000	1000	1000	1000	1000	1000	1000	1000	1000	1000	1000	1000	1000	1000
90.011@15.32	444484	73731.6	321333	341643	118695	80730.6	296155	267889	304286	201293	374676	261086	85141.1	249876	109594	152143	447338	104173	229655	177628	421602	244540	332730	225790	277887	198409	241892	189950	288870	262019	239822	158270	131008	308286	250407	431698	414345	197593	338286	343833	285356	366757	194340	127685	503264	228429	261946	319073	248081
90.011@15.16	172159	92771.6	156131	192182	183641	232612	366343	212706	158559	257073	70286.8	344279	98953.6	374236	316814	719175	325349	314872	355456	255121	104160	146861	366958	210937	490144	233971	256778	136833	173170	165765	120282	56294.8	220890	205838	96298.4	135000	84305.1	235877	121874	215308	258338	174880	108626	138513	339534	115751	380565	215339	271974
90.011@0.37	484709	191986	462735	115047	218740	180356	172680	102662	210501	108802	229196	488572	159815	517203	541800	167173	200623	202362	199378	573514	477469	132206	496410	151932	218282	496914	275221	173832	100544	159363	94931.6	129479	101033	131564	196052	358338	128904	827793	821928	491092	129194	160268	201668	134801	459495	153374	505128	532610	191674
90.011@16.03	3.96747e+06	3.90943e+06	3.87555e+06	3.7818e+06	4.03258e+06	4.04293e+06	3.9206e+06	3.94235e+06	3941346	3.99134e+06	3.89103e+06	3759973	3946549	3.97978e+06	3.98436e+06	3.23307e+06	3881547	3987140	3.92769e+06	3916724	3.71586e+06	3.83656e+06	4.05602e+06	3.81868e+06	3.50781e+06	3.97533e+06	3.90935e+06	2.46962e+06	2.38681e+06	2.84294e+06	2.67366e+06	2.82974e+06	2.70058e+06	3.40256e+06	3.78982e+06	3.81709e+06	3.97127e+06	3.98484e+06	4.02195e+06	3.91616e+06	3.99448e+06	3936013	3.97067e+06	3.9156e+06	3.98823e+06	4.01554e+06	4.16256e+06	3.96678e+06	4.02331e+06
90.011@15.75	352627	173546	376764	127076	209577	355244	398583	595228	220710	603241	599491	641767	219229	267535	657518	377915	189644	246683	239585	351374	562734	625140	509119	635017	662510	144706	591311	85150.6	206930	134513	464503	144548	208821	169716	650861	613845	440186	192050	352314	652716	401237	248534	334381	487584	442360	174679	564848	519266	465651
90.011@15.89	689714	328454	239394	127076	463909	308566	395010	586596	621284	181636	194576	471261	613561	628197	717274	733086	711734	377896	553803	616278	464689	406749	642310	284806	641837	666776	461840	407746	334189	216881	435822	363556	168307	308917	299573	139423	446479	463625	631216	635064	163860	631972	416702	626897	445166	200911	377613	219522	586604
90.011@0.21	150266	245165	158885	446746	331142	469593	224814	289733	212286	296884	249651	239090	237877	149578	203562	320726	335402	193543	315764	181109	215357	316765	202085	239369	336543	200500	281941	193712	356553	380170	243284	204197	225458	136487	200069	227169	461067	466086	496737	175204	307949	282475	258685	256308	233540	253192	201476	209089	303276
90.055@1.22	1000	1000	1000	145386	174022	183324	507762	476800	493233	995381	991220	1.07379e+06	1.5964e+06	1.7755e+06	1.80147e+06	2.24351e+06	2.06517e+06	2.02886e+06	2.37442e+06	2344486	2.48518e+06	2328962	2297698	2.35603e+06	2.67732e+06	2.43285e+06	2.71157e+06	2.85849e+06	2.9808e+06	2.76812e+06	2.99328e+06	3.14907e+06	3088945	517408	584876	493365	654056	685225	652248	956921	944869	930265	1.34375e+06	1.35742e+06	1.53364e+06	2285903	2.31329e+06	2.42531e+06	3.12301e+06
90.055@2.49	31746.6	21484	31503	21915	22682.8	21973.9	30804.8	30511.2	23485.7	35764.3	15412.8	34887.6	23453.9	24824.7	39821.4	42589.4	44302.8	39878.4	46573.6	43763.5	42154.9	44728.1	38346.3	46057.5	153965	133854	45721	51253.5	52515.7	52591.3	52057.3	53419.2	48312.5	44513.7	37675.2	14516.9	30495.2	23466.5	39615.8	38702.5	34509.8	39537.9	37315.7	44175.3	34823.8	47077.7	50725.4	230099	181443
90.507@0.29	1.33545e+06	1.31834e+06	1.15605e+06	673886	433723	391477	956189	901008	856695	845545	792725	505046	1.05186e+06	895593	962777	930756	1006484	1.00897e+06	852468	845559	811451	868518	935566	877936	912746	984874	78203.4	787110	797900	726152	798753	882707	891510	1.18786e+06	1.17913e+06	1.12404e+06	791435	328874	467135	926830	947937	826588	862408	811093	829808	963097	800617	575129	1.03371e+06
90.977@15.65	37677.4	34818.6	55604.6	58502.3	41609.7	66756.3	67885.2	86531.9	154818	60866.8	72635.8	40617.3	36386.2	320375	72774.1	320640	31738.4	62373.2	141145	67999.6	35327	30541.9	25670.7	33480.5	64443.3	40589.5	265960	87585.7	50270.6	459137	76503.5	77879.6	106120	24057.4	158361	57332.1	18367.7	47077.7	260909	31804.7	57495.6	34574.4	208394	76556.9	17366.4	306346	254731	19102.2	66308.8
90.977@15.81	63290.3	45216.2	17662.3	51823.3	37479.8	52457.7	18747.2	39783.9	60620.1	53018.2	29392	311278	189470	38781.3	270492	67315.7	38959.2	261840	29874.3	21780.7	45874.4	27627.6	37328.1	75509.5	235155	235303	46621.6	62719.3	88073.2	97202.2	136548	138182	136996	35937.5	27431.4	119882	39128	207434	89363.4	216375	45756.5	61828.3	44952.3	53896.1	295215	40687.7	47952.7	29247.2	88047.2
90.977@15.93	256061	102996	71364.9	196566	89985.1	242620	35416.5	229810	49016	45458.5	29392	85349.7	83058.3	61557.5	62658.3	23868.8	259021	57025	55269.3	23632.5	42628.1	152735	58048	47589.5	68981.6	18818.6	40101.1	37565.4	525868	114367	543081	145394	554888	25476.2	26384.5	305538	61217.1	27989.9	43735.8	20841	264446	85966.1	46914.1	39493.1	61737.9	96353.4	37885.2	158601	44913.2
90.977@1.13	2.44466e+06	2.55998e+06	2598620	2.44226e+06	2.57903e+06	2559196	2.52239e+06	2.63605e+06	2.58365e+06	2681695	2.77472e+06	2.72614e+06	2789807	2831728	2.85754e+06	2.79934e+06	2986164	2.88209e+06	2.89409e+06	2975385	3.01003e+06	2.96501e+06	2.97855e+06	2971983	2.85448e+06	2934543	2.8834e+06	3.01029e+06	3.22262e+06	3063339	3.00875e+06	3109794	3.11385e+06	2.17508e+06	2.20328e+06	2.20164e+06	2.1537e+06	2.22485e+06	2168981	2192303	2.25342e+06	2.32867e+06	2.16905e+06	2.26853e+06	2293698	2317584	2.36816e+06	2.40121e+06	2.39286e+06
90.977@0.18	36632.9	29153.5	28661.2	21234.5	12907.5	31171.2	1000	1000	12968.1	23221.5	14007.8	17146.3	28510.5	24361.9	28409.3	29431.8	26934.4	31312.9	26733.4	24109.8	22693.6	25970.9	28893.8	24662.3	22440.6	25772.1	28238.8	40094.2	39337.6	35327.2	50829.6	54773.8	36461.7	25994.8	25355.4	27599.1	30146	23395.3	29428.9	15813.4	13959.7	11759	16703	25229.8	15889.2	19065.4	26633.6	19130.1	26430.1
91.055@2.17	1569495	1.51418e+06	1.51604e+06	1.42445e+06	1.67767e+06	1.37622e+06	1.65113e+06	1.6911e+06	1.56133e+06	1.61901e+06	1.71937e+06	1.74744e+06	1.42986e+06	1.48199e+06	1.48673e+06	1.40319e+06	1471715	1.33349e+06	1.29484e+06	1.36358e+06	1.45857e+06	1.30962e+06	1.38511e+06	1.35301e+06	703888	699211	683654	1.04432e+06	1.05493e+06	1056092	1.00951e+06	1181234	1.24216e+06	1.15688e+06	1.08332e+06	2.22514e+06	1.10723e+06	2258263	2294294	2157692	1.06517e+06	2274825	2.12658e+06	2.2641e+06	2.17988e+06	957536	2.16833e+06	2.03048e+06	1963482
91.055@2.04	678215	674231	706852	634366	705624	609682	688504	670104	679910	690872	715886	609202	617886	660826	633361	646410	613433	589680	615915	569674	581949	565426	615698	556938	604198	656534	580574	508194	475503	485499	431130	578881	600546	2.06906e+06	2.17488e+06	979260	2.11305e+06	1.03724e+06	1.07011e+06	1.02075e+06	2.31171e+06	993642	1.07854e+06	1.01019e+06	899853	2.04286e+06	955771	908425	1.02272e+06
91.055@5.28	478841	754214	520083	486769	539426	508230	705622	546138	712779	762568	664844	540117	472036	493029	499516	439521	514685	489342	427031	641204	695068	373723	469131	451772	421603	470302	465558	374053	421963	419055	367013	421740	431845	904347	864419	920912	716059	977190	1.00452e+06	975933	1.0823e+06	1.06255e+06	985495	1.07157e+06	1.06737e+06	882054	1036492	845137	948747
91.505@14.01	16568.4	1000	1000	1000	1000	12045.3	10579.2	12555.7	25751.5	13064.4	1000	12701.8	26971.5	34648.2	86646.5	27360.6	10321	18998	80221.9	13713.6	36028.1	1000	19700.4	1000	1000	30193	1000	12932.6	20659.2	22521.1	17735	18347.6	283844	1000	1000	17701.9	1000	1000	1000	10734.8	14149.9	21999.1	11460	1000	23567.2	13720.9	20397.6	13954.6	44616.7
91.505@13.86	1000	1000	1000	1000	1000	12187.3	17249.6	15064.1	1000	16923.9	1000	1000	1000	19122.7	19000.4	10778.9	56447.2	25409.9	24339.5	152149	10076.7	71279	207604	126592	1000	19955.9	1000	22992.8	183338	165645	23047.9	26687.8	1000	1000	10147.6	1000	1000	1000	1000	12972.9	10906.1	22149	1000	17354.1	12563.9	15190.1	19614.5	1000	1000
91.505@13.59	1000	1000	1000	1000	1000	1000	10699.8	12800.3	1000	1000	1000	10368	29794.2	11570.4	10430.4	17680.5	11788.9	24077.5	1000	19700.4	30706.7	69627.3	13834.6	1000	145892	10686.6	142319	265693	1000	1000	231941	146856	12385.3	1000	1000	11051.2	1000	1000	1000	1000	1000	11841.5	17028.1	1000	1000	18329.3	13701.5	19197.9	14458.6
91.505@0.29	442210	466664	30593.7	243953	284572	288504	370458	315567	264748	285353	260325	309815	340901	334478	339156	319954	354130	366133	293413	263142	299228	304566	310522	288072	344223	331141	334319	257754	278762	240730	285342	300412	302983	398441	422479	375433	268998	242509	230358	315129	342581	316001	293554	269228	275072	341269	333216	355257	316820
91.543@1.05	28993.6	31968.8	30561.2	26474.1	27370.5	28561	29768.3	30465.8	33417.7	29837.1	28949.6	32441.7	36979.5	35455	37872.4	30720.3	38191.2	32871.7	34375.2	35988.5	35782	35120.4	42454.7	34216.5	40036.8	35866.9	56689.7	41958	44908.6	40066	42013.3	40272.5	44907.9	45939.8	48562.7	47128	44540.8	47805.7	38307.5	47422.2	42576.2	47269.3	49280.9	46938.3	50319.9	52768.6	50568.9	56222.9	56038.5
92.018@0.35	162627	89794.7	100373	485398	954506	1.10815e+06	100348	41357.5	180350	43565	114946	206311	58103.6	77495	69590.8	58993.1	78553	51375.2	86414.9	110187	85543	46436.6	85467.5	85781.3	187106	75842	93230.6	69502.4	32571.7	85840.1	128711	44275	36586	45045.1	66577.2	102641	779911	992209	1.00614e+06	116719	126525	200004	131751	47467	195672	59836.5	88942.2	66985.1	235968
92.022@15.99	1.14189e+06	970615	740825	2187108	2229341	2266089	2.26872e+06	2.31209e+06	1.68096e+06	790856	1.63183e+06	1.46658e+06	2290015	209344	568776	188133	212047	228745	67016.3	186702	179071	2.64933e+06	347221	2.5358e+06	143787	585943	2.65818e+06	795531	140446	1.35538e+06	1.64415e+06	215469	232128	971420	660807	232160	2.14611e+06	662194	572302	2.24066e+06	2.24664e+06	956546	2.60291e+06	2.46709e+06	1.65814e+06	2.30995e+06	2.25847e+06	2.18838e+06	2.50757e+06
92.025@0.2	431907	151325	415086	865046	276967	580442	130661	453548	513417	431065	435728	422794	440191	249173	254576	394828	410209	231191	156327	183978	458365	505906	257037	450807	203016	461531	474929	345632	57191.9	205927	126827	219891	126108	95822.7	275354	297594	1.10878e+06	255092	405741	525328	386747	444456	405458	436215	478098	406291	507392	409964	283204
92.025@15.27	143995	368414	62283.5	52467.6	210442	177504	141712	78163.8	78279.8	130157	86196.4	161646	151985	186078	121649	198012	43239.7	182124	137158	58084.4	128567	84361.7	78962.1	243082	95695.9	91900.7	246838	96887.7	66587.6	121542	424914	51549.7	103954	116144	208757	85711.9	266543	137192	90794.5	162515	209091	117393	82226.3	250887	161028	48168.9	263619	181118	141426
92.026@15.73	151516	100275	136497	206664	96974.9	214448	165228	379646	363188	1.66826e+06	330756	204684	76042.7	354934	193576	196517	152565	1.61667e+06	394970	104475	396249	124523	2.18192e+06	218840	303753	345948	241155	141567	74620.8	93579.5	129728	1.87938e+06	1.91314e+06	163004	62992.8	44467.2	116536	723763	639087	164191	98825.5	1.40267e+06	389094	244339	364261	114090	160583	384285	435079
92.026@15.37	718502	134929	71281.9	117302	76823.9	137768	312628	145610	732264	270753	781120	334443	172628	156877	297625	62622.1	745081	299451	68135	161253	812767	356098	58035.4	374320	277661	180252	343526	423031	66080.2	280815	169831	144769	196892	114400	198864	128770	175781	250493	845545	90294.9	197130	101631	366034	179190	751339	251916	165154	154794	215197
92.026@15.88	134581	278507	231745	103698	282462	137026	258147	113627	129213	212026	160023	176592	174043	2.37123e+06	212293	1.90759e+06	1.45845e+06	162169	236045	2.37885e+06	414541	336420	223214	324513	268746	187277	548682	106509	124409	323247	161298	199295	138202	100851	257995	1.46231e+06	90758.5	309620	288043	286708	168844	218059	272789	185801	275861	428688	203114	265771	395840
92.026@15.51	199060	277377	741318	134346	56952.8	160720	235133	343745	380062	102538	193664	1.02812e+06	98274.2	349537	1.10911e+06	213624	93163.1	256944	1.47678e+06	74839.3	1.64479e+06	230287	66736.4	159869	1.28408e+06	1.12831e+06	219884	504357	733935	774796	209332	241302	66920.1	431248	615525	110416	237996	907246	141792	208667	249048	173963	192938	114771	119336	120740	246607	212804	130267
92.026@15.61	179094	173723	87070.9	281793	276652	145472	87090.9	309926	188875	403733	316615	147500	185445	263324	493230	65587.5	208823	95461.6	137134	129657	229760	273161	240429	259809	211022	204267	331567	125526	74620.8	288208	271759	149183	105404	202456	197221	72893.5	214428	303716	102117	146706	310989	242332	223339	353768	327274	194465	175467	69762	232937
93.045@16.05	280110	104005	254454	68728.8	171158	211660	177399	116423	107420	66250.2	81525	38543.8	66094.9	104050	142916	125963	250228	162115	138215	150344	159959	159405	264928	25881.3	161210	187971	92758.2	262111	125236	200852	163100	172939	281611	213679	207908	253718	170265	219788	268028	119445	163976	105411	178033	128653	266491	29249.7	108629	56965.2	196356
93.059@3.08	20365	23037.4	14063.6	26464.5	30954.9	37796.8	59279.9	53723.1	83929.9	70944	79424.6	91888.5	93547.3	85784.3	110586	90512.5	98864.2	112455	134776	135424	116519	142152	129734	153552	144125	149309	182795	154959	156469	181283	182267	172729	210960	17781.2	25257.5	1000	36904.9	31780.2	40573.9	55988.3	56493.6	63218.9	78371.2	84033.2	71934.7	116090	114224	109430	122331
93.07@2.05	1000	1000	1000	11516.4	1000	1000	1000	1000	11501.4	1000	1000	1000	1000	1000	1000	1000	1000	1000	11014.3	1000	12039	14293.9	1000	1000	1000	1000	1000	1000	1000	1000	1000	1000	1000	209764	207673	179505	218813	255703	198447	149656	144336	208621	144717	209937	185110	229616	209602	196230	209676
93.07@5.28	271654	309095	267508	266973	265870	286174	250381	281879	259963	267201	249273	271036	227004	265672	241982	235263	216984	240672	205320	232178	246596	225267	231571	208250	224564	202286	183803	193188	234886	210782	219716	207338	235842	381849	367019	412950	353852	407898	415110	411052	405541	413994	384296	400250	390660	348477	392704	353662	366292
93.07@1.6	15249.9	14562.3	1000	1000	11790.2	1000	1000	1000	1000	1000	1000	1000	1000	1000	1000	1000	1000	1000	10778.6	1000	1000	10666.3	1000	1000	1000	11241.9	10078.5	1000	1000	1000	1000	1000	1000	88134.8	97867.9	92980.7	82773.5	67501.1	87041	65877.3	105520	86266.8	82723.8	84787	87513.3	68988.4	87901.8	87785.8	69523.5
93.602@1.07	1000	1000	1000	1000	1000	1000	1000	1000	1000	1000	1000	1000	1000	1000	1000	1000	1000	1000	1000	1000	1000	1000	1000	1000	1000	1000	1000	11355	10159.2	1000	17612.3	20027.6	22274.4	1000	1000	1000	1000	1000	1000	1000	1000	1000	1000	1000	1000	1000	1000	1000	1000
93.602@1.61	1000	1000	32236.3	1000	17396.4	41904.7	10770.8	1000	1000	15236.2	10259.8	23311	50444.3	52621.7	1000	30002.3	31072.9	49535.8	1000	48799.4	20349.8	15594.1	11442.3	1000	1000	16154.4	1000	16692.5	13211.2	1000	1000	1000	11398.2	1000	32484.3	18765.6	1000	1000	17145.5	1000	11125	16736.4	38452.7	45355.5	23885.6	12413	40512.2	21108.9	21116.6
94.023@15.34	13170.6	10315.3	1000	24771.3	38894.4	49462	112502	47190.2	106958	61947.5	99556.6	76768.8	57248.8	52211.2	24241.6	37732.5	33761.7	60864	100342	98397.7	168491	43977.2	86581.9	44191.3	29587.7	60171.4	132587	55528.2	26172.6	43834.5	37059.2	63783.2	221243	1000	1000	12008.3	21304.4	24736.6	49097.3	61159.1	42164.2	67433.9	97333.8	22635.3	29041.9	69894.5	33375.6	27812.7	49785.5
94.023@15.49	47389.1	12116.5	30733.1	29432.4	18804.7	29088.4	36229.3	47404.6	43178.2	41845.2	75296.6	195453	32680.6	104276	207569	55660.3	105902	93618.1	248689	47751.1	87616.3	36546.4	22280.7	65143.6	241103	219521	134448	154830	123173	54830.4	42927.7	69418.8	60569.1	41236.2	30028.9	52041.4	65415.7	59512	54830.8	50133.6	114880	31685.6	39861	48749.4	34413.7	42186.8	406982	89707.8	21371.5
94.023@15.72	62014.6	25988.3	32006.6	71437.6	243543	80449	26472.2	89796.4	55084	57228.4	124697	87660	39429.3	40790.8	66948.1	72060.6	35322.4	450777	271841	47299.5	100556	54184.5	432842	734293	102420	77441.7	81352.3	45498.1	24699	47358.6	30122	87717.7	59310	31695.6	26274.2	33323.2	42064.8	118150	122019	82964.3	47490.7	179907	155084	59767.9	81744	60813.1	41443.6	75322.3	139460
94.024@15.91	68303.9	29171.9	19493.1	34349.4	114437	134969	483178	79066.7	60974.7	38961	51661.8	50364.7	53166.3	31038.5	55525.6	591196	136041	58886.8	117933	52002.7	72253.2	34134.4	73809.1	93606.1	96925.3	70147.6	171899	52015.5	23115.4	500440	40749.6	22159.5	88803.7	19289.5	46971.3	148765	37729.1	70177.2	91927.1	90921	53497.9	85879.6	122656	139954	32349.1	104788	63313.2	48062.4	97549.8
94.024@0.2	16194.4	24112.8	35739	211831	136233	222367	37781.1	116060	74958.1	124081	120018	123574	100846	87514.9	124946	99690.6	56520.3	100040	112897	120298	134703	152727	74342.9	126687	90708	136455	90210.6	34999.1	75930.8	54616	60655.3	109425	112621	29849.5	34540.2	55583.3	226461	140869	103733	138677	39196	120744	106887	124642	47592.2	40776.5	54507.8	98856.1	135505
94.066@4.51	64594.1	90351.9	87529.9	80133.6	89905.8	84484.3	214029	95887.6	90638.6	92375.9	95546.6	105036	83935.4	100034	89644.1	171162	94479.1	200494	277742	207295	220289	99944.5	119689	238863	331106	268128	108166	101010	113914	306408	116638	225433	261438	95249.5	88583.7	88380.3	76593	309970	86637.5	95265.4	78328.1	92291.8	100873	103348	101192	78269.5	99590.7	95186.6	93018.6
95.024@1.54	1000	1000	1000	1000	1000	1000	25688.6	23042.8	28334.6	50987.1	50332	57629.7	71044.5	75671.1	73832.4	66432.7	74378.8	71860.6	62830.4	65683.2	65683.5	58135.9	62413.9	62727.8	62825.9	61526.7	69335.3	60322.4	61426.2	59561.3	56277.6	61909.7	66364	10720.1	12690.2	1000	1000	1000	1000	1000	1000	1000	1000	1000	1000	14667.6	14992.3	20912.3	20156.3
95.086@0.27	1000	29960.9	10007.4	32444.2	16466.2	1000	45258.6	36528.9	46056.9	51776.1	53193.9	18310.6	47479.2	56050.2	52605.5	42445.6	45238.6	43607.3	55526.6	57036.6	49079.7	36802.3	55866.1	44914.4	30264.9	40971.6	25785.4	39057.7	24443.1	28842.4	36616.4	15777.5	41743.4	35355.1	1000	17847	21637	10314.1	16799	36137.9	47827.7	50508.7	46186.3	57832.3	32411.3	35922	47236	51338.8	38992.5
96.056@16.02	96184.6	206301	147293	379238	503546	523694	127654	588595	146356	565881	164149	578340	528142	130578	643985	124766	90815.3	581475	204861	129536	578737	681882	604658	500953	631705	624854	83467.7	61237.7	135716	131133	469441	569937	578002	213569	172182	316381	543294	156987	403269	494618	159003	610730	548977	624214	464201	124525	579365	95971.1	150663
96.065@0.18	62451.3	100189	109115	93925.6	62976.5	85890	96337	129662	81478.3	28264.6	23997.4	74541.7	24132.8	31512.9	34460.1	18995.5	12761.3	34170.2	23408.9	25591.7	29227.2	139943	18362	28498.5	25395.3	30423.3	20107.6	39131.8	123419	103881	10114.6	47493.7	44172.8	45170.4	62683.2	108594	102598	67283.5	116312	30345.6	100671	130629	101343	21843.6	63096.2	32769.7	89206.4	26978.5	29125.2
96.515@0.33	39376.7	1000	27426	60308.6	58232.5	81775.6	58567.6	54057.3	12375.1	33270.7	28317.6	41172.8	76413	31467.7	58008.2	54923	62909.8	44396.3	46961.7	34506.2	41824.3	52646.9	33369	50832.3	47387.3	35442.8	70762	21609	15583.4	22251	25542.4	37308.7	25524.6	53450.9	56553.3	43453	45222.7	36175.1	37070.6	43612.8	28917.2	44221.5	29846.6	1000	22409.7	49214.8	36055.6	24655.6	63777.2
96.962@0.43	17062.7	19773.1	16712.4	41976.2	36101.2	26209.4	1000	16597.1	17268.7	16200.6	16820.3	1000	10562.4	14498.8	29846.4	16817.1	19173.4	21521.9	1000	28140.3	1000	17438	18188.3	34286.8	29123.8	1000	1000	10316.5	16597.7	28872.5	16220	15656.5	1000	20174.2	74442.6	1000	20989	15699.7	41288	34053.6	25691.3	1000	39623.9	11299.6	18324.5	17277.3	1000	12152.7	12116.8
97.008@4.8	315496	300467	4.13067e+06	306718	4.14338e+06	308758	4.42036e+06	4.42988e+06	296068	4594519	4293540	317009	329250	4596490	315443	367109	317514	334757	313424	349197	322518	332679	355383	4.28328e+06	378274	355280	348737	287723	306067	330523	333154	4214691	4330520	4.24693e+06	3920851	301058	293319	4344710	4393931	336064	4319101	325413	4417184	4.40422e+06	341924	355848	341533	343633	314844
97.008@4.95	314462	297845	315081	4.421e+06	301274	4302713	340025	324617	304882	342911	305252	319734	325277	341189	358248	331350	347478	339012	318673	333839	346491	326287	325150	322785	356877	344471	347533	4119465	297458	320496	326490	326086	349916	320028	298112	4172367	307829	311929	331025	4321586	298586	325425	308511	332695	320132	321379	4.65992e+06	332668	4414680
97.029@1.28	1.26338e+06	1.26062e+06	1.20198e+06	1.17518e+06	1.21389e+06	1.21361e+06	1107317	1184735	1119163	894850	885245	831700	723762	737227	710221	583416	590242	582940	440500	453393	436426	360426	330681	370946	287565	283734	273944	275739	273923	341093	278899	299362	290124	1.31102e+06	1.36762e+06	1.32289e+06	1.1211e+06	1.26557e+06	1.28541e+06	1171193	1217339	1.26881e+06	1.10365e+06	1.11125e+06	1.06102e+06	965472	1066263	961130	837884
97.029@1.51	143611	188316	140984	59143.9	46491.4	95190.9	22700.8	81711.7	84204.4	64990	68592.5	56066.9	44125.1	84635.6	55503.7	63224.2	55421.3	27202.4	30469.6	70979.4	55203	67857.8	64187.6	48903.8	59236.8	59350.8	25560	81270.5	67667.8	98993.9	67628.2	71107.1	60668.6	125581	179813	154603	168843	186333	173634	134457	80773.8	138186	128138	131531	110296	115404	127304	128142	159565
97.076@15.43	214803	688816	281742	283694	111537	526004	207862	527746	329828	349424	472381	825048	340173	741454	1062854	380626	352826	1.28643e+06	361374	205095	695474	675088	140094	437364	749666	621242	409604	226685	1.04405e+06	2.21207e+06	345469	394710	1640007	247662	226489	309623	347898	360927	281929	254774	285646	204747	736588	234204	629437	253590	369383	432317	436272
97.076@15.97	522969	183958	150884	189484	3.79333e+06	1.76189e+06	4.37955e+06	4123957	4562825	204502	4.75587e+06	4.75353e+06	864668	676106	5.47859e+06	928207	757539	3.21784e+06	619466	728144	5165914	1.04105e+06	4891380	5708664	988476	321643	5.83279e+06	5419435	5652640	3.56448e+06	5632422	367551	863369	2.62181e+06	919649	2967482	3.96727e+06	548700	381609	183038	4.39072e+06	1.62213e+06	5.12888e+06	322943	4.80648e+06	4.90356e+06	5066517	4840351	5582639
97.076@15.59	65351.7	69571.4	2.76431e+06	540693	198863	2.13297e+06	729805	225307	339974	425002	565060	749529	4.92016e+06	728379	888927	317695	521252	1.01538e+06	2151308	619113	618809	571206	464342	302515	6007650	2.50864e+06	651190	457232	858474	1.25688e+06	359486	334900	677470	407421	189835	219498	221607	564502	242498	281852	466076	289184	310279	397589	545426	630257	486864	568788	599545
97.076@15.74	156888	382272	123054	3.75032e+06	219605	344409	435631	844142	468463	4889484	831328	488816	197617	1065044	848880	650578	377282	524402	485977	4.98738e+06	1.05708e+06	5.81864e+06	242066	283785	696380	2.1717e+06	1.27048e+06	850211	961692	576496	431942	5151472	609514	191647	1.82362e+06	155211	449842	4.13107e+06	450890	758388	910149	2.90939e+06	362144	364881	749358	362456	1.10144e+06	1.07346e+06	1.1416e+06
97.076@15.86	1.93486e+06	1717856	200113	709134	347665	680179	411762	422598	259146	680614	456096	734716	735934	5.11144e+06	593254	5284843	5.03252e+06	527761	2378706	679582	543562	673248	242066	633336	1.25159e+06	487936	932074	992883	427806	834270	660922	881536	425141	185043	357902	271285	200576	532098	3.87172e+06	4.27577e+06	990905	720088	950600	5.10576e+06	754874	346697	614787	547703	1.04995e+06
97.076@0.2	718856	181645	824883	1.54229e+06	1.61756e+06	1.64212e+06	1.0804e+06	897434	946680	1.01198e+06	975580	1.00059e+06	1.1525e+06	1.09243e+06	1.06697e+06	911018	871389	1.04924e+06	567767	931624	1.11554e+06	1.13536e+06	1.11431e+06	930087	1.06747e+06	1107199	1.04039e+06	1.02097e+06	1.12122e+06	1.27442e+06	563192	641902	666486	446570	696166	721682	1.63867e+06	1.41619e+06	1.63455e+06	994537	877897	896419	825267	1.14059e+06	1.03616e+06	964249	1.19659e+06	1.06796e+06	1.04888e+06
97.515@0.33	292665	378618	341700	197604	307623	159512	304152	319649	171847	162515	163370	230229	342652	203846	247840	241772	269191	237129	239351	165150	169426	204434	164869	188514	196103	247028	218116	71210.3	90179.7	95011.2	36820.2	103488	119695	116759	301454	280785	255147	126043	258287	148530	248381	197545	179420	150258	153037	260858	203133	339463	253792
97.515@13.09	14711.7	1000	1000	1000	13083.6	1000	63192	70587.7	30037.4	21789.1	34517	23029.5	1000	29131.5	130507	14291.5	121102	11425.4	136338	12535.4	34231.3	21290.1	16949.6	128700	104157	86346.3	18167.9	133141	13238.3	70598.9	1000	35181.5	33817.5	1000	1000	1000	18369.6	1000	10944.2	16065.8	29704.8	40775.3	24627.2	1000	22021	37607.4	65162.7	1000	19755.2
97.515@13.22	1000	16911.9	1000	11165.8	18142.2	13255.2	21097.6	12369.7	1000	134663	1000	19071.5	15464.5	73207.8	29229.4	125869	22535.4	81876.8	22081	30947	25011.6	123437	12120	17822.5	1000	30971.4	72691.6	15401	34193.5	34744.4	1000	25666.6	1000	22272.9	1000	1000	33182.9	20794.2	11446.4	41279.3	38397	23652.1	25732	19227.2	68465.8	18425.5	15762.6	110433	26251.1
97.969@0.34	281982	121239	16000.2	239280	281525	336311	65581.7	322872	169900	128854	162487	239464	279682	190985	209667	230624	229828	288164	178745	142401	169006	164383	163999	152342	220413	231111	198542	87960.1	93452.3	93152.5	91861	116650	128658	286646	327546	284195	311533	265767	285995	212580	253225	219139	169341	156525	158709	282874	36667.2	216661	234545
98.014@13.41	1000	1000	1000	10321	1000	1000	1000	11908.8	1000	12131	1000	15054.6	26697	1000	15258.6	1000	1000	14600.8	15546	10603.5	14387	10842	103088	13222.9	127233	170357	143029	13582.8	32591.2	1000	1000	1000	20838.2	1000	1000	1000	1000	1000	1000	1000	1000	19418.2	1000	1000	1000	16230.9	13960.1	18624.2	1000
98.014@13.59	1000	1000	1000	1000	1000	12389	15253.3	15412.5	1000	1000	10446.8	1000	12302.1	1000	13212.2	14717	124248	15696.8	1000	13665	13469.1	1000	17454.4	42177.3	18121.5	25339.2	12294.8	1000	24495	16996.7	18556	12207.7	12812.4	1000	1000	1000	1000	1000	1000	1000	11156.5	17694	14005.3	18796.6	1000	17740.7	1000	1000	26181.9
98.014@13.12	1000	1000	1000	22429.1	1000	17572.3	13892.2	11489.1	10226.7	19858.2	27032.2	1000	11476.2	1000	22929.2	1000	21192.5	1000	12910.3	156357	10568.6	26568.3	1000	23737.1	26022.1	14264.9	26856.3	14951.7	17373.5	10406.6	1000	28388.8	25781	1000	10904.1	1000	23689.5	19437.1	1000	20081	27073.2	22639.1	20061.5	1000	1000	20484.7	10757.4	33449.6	11390.5
98.014@0.32	264446	192633	168124	76386	97222.7	228658	253540	262951	202913	197487	212754	110985	263912	206053	237494	235323	250141	283054	237937	205331	228148	233476	248337	241650	221959	239550	238858	35770	165308	154483	151637	204995	175390	266995	299085	245942	176187	91989.8	120691	222042	246822	88269.9	196089	203283	197306	230435	220866	266678	148314
98.048@16.05	468038	496297	559923	504429	499582	519998	389672	551358	413055	412594	553402	577279	468909	593862	513303	391548	523038	497801	519212	525536	430854	506054	473206	541087	532006	497939	491955	717134	676265	650508	507055	614503	696839	639845	633828	609755	518106	479077	694060	448585	486371	446973	459766	483319	621572	396058	543997	400307	604136
98.071@0.37	194812	182638	166236	152099	215926	371469	180041	103285	163367	128236	213983	148668	125582	204844	197086	120639	161114	108119	182104	271384	317012	106132	189508	125518	204478	171659	276933	352599	112936	313138	327757	158054	141182	98845.9	135350	199131	311791	173242	205074	157605	78797.5	100983	175468	114578	185294	123051	801311	157074	160451
98.072@16.01	410870	2.82095e+06	1.61303e+06	3019948	532336	513826	600152	647094	592690	3.64492e+06	544793	675196	3.61732e+06	3750436	533962	616213	3641151	463004	678935	3.60465e+06	429657	3.82676e+06	557581	430703	3.97048e+06	662410	642480	362312	655333	728062	3.79028e+06	3.78084e+06	3.91156e+06	491788	2.72443e+06	446316	377047	3.25152e+06	1.86931e+06	3.36711e+06	677788	401993	732937	3.58968e+06	628246	470428	483552	444094	732260
98.072@0.16	817269	745009	776465	468995	1.14132e+06	247103	456928	457734	414664	694447	677325	402837	442792	295672	786253	441145	324838	243598	156267	513697	771480	529744	285296	153799	141473	156092	173090	860355	158238	428732	214008	198009	203382	417382	343316	761501	1.07156e+06	279213	330129	389430	253194	291600	670489	447847	686023	661874	253778	462226	252644
98.513@0.33	2.1565e+06	5.99767e+06	3468978	3.35025e+06	4.80885e+06	4.64054e+06	4873816	4843573	1.64066e+06	2.51683e+06	1.76213e+06	3.78252e+06	5296499	3.0662e+06	4.11669e+06	3.74908e+06	2.23559e+06	4569162	3797507	1.21971e+06	2.91683e+06	1.8748e+06	2.7869e+06	2.89824e+06	3548470	4034942	2.31227e+06	1.16322e+06	1.56542e+06	1.60286e+06	1.38846e+06	1.9766e+06	1.74643e+06	4376000	6.5301e+06	2.8276e+06	4.05589e+06	1.95994e+06	3.94925e+06	1779614	4391983	3397619	1.41625e+06	2.4798e+06	2.60151e+06	3868111	647732	4.99903e+06	1.99622e+06
98.513@13.14	2161111	577497	340437	2.50441e+06	493922	2.61041e+06	2608359	3.04106e+06	2927515	3029222	2.83388e+06	2.85732e+06	2.8177e+06	2.86334e+06	2429798	2.88184e+06	2.74554e+06	2.85787e+06	2.85678e+06	562688	2.9453e+06	3078522	3.01866e+06	3.02996e+06	2.9437e+06	2.90613e+06	2908999	2423705	538271	568412	599962	615363	608871	543217	2.16003e+06	543572	2736318	2.62403e+06	2.55682e+06	2.843e+06	2.94615e+06	3.07615e+06	2.9431e+06	2.87597e+06	2.98826e+06	3.1725e+06	3110264	3.17439e+06	2947757
98.513@13.26	562919	504705	524299	576956	542262	178303	589230	558318	579347	600215	584704	374270	521685	577946	501362	543961	506350	526084	612817	548518	544439	561880	446178	576146	534354	328635	539654	534226	573182	432911	499504	494605	501736	483460	145910	499210	564754	567192	581255	567681	545640	558068	545918	612262	580745	584430	531790	623975	239646
98.513@12.12	261116	271223	241624	231526	51134.2	222265	160027	259599	260032	255996	261909	223806	254954	224210	236188	255246	253824	236480	151508	237372	251798	260188	252271	239030	240721	254797	226492	233806	242907	230412	261657	239796	228222	258122	245002	124744	227864	248201	255425	256263	231721	257461	231274	233204	237154	234863	231104	256081	237463
98.513@11.87	272493	259814	256634	237368	248341	273671	282112	271952	257199	263314	255325	248411	246347	264226	288225	282595	262739	253316	248606	243379	250389	258147	256642	253767	239867	219058	251324	241690	259196	254475	247467	254070	264182	220012	251696	265550	248384	102007	256522	259717	270990	274454	252260	241856	276027	248632	268714	256722	259561
98.513@0.2	2.29006e+06	1528539	491388	486420	1.27464e+06	1.62574e+06	211654	644101	408063	245939	272279	213242	815941	303702	222972	340549	341485	449274	370891	111590	186381	180488	127064	69402.3	317743	323165	278361	158276	97638.5	171140	112659	151789	124533	520661	950815	923759	950153	1.1075e+06	517974	621165	251312	127446	181282	366380	130184	322467	515070	293869	234665
98.513@12.43	162902	216359	211410	168708	83755.3	169359	208459	200385	231516	174622	223305	209370	193542	192063	190771	179747	160615	215150	210579	203188	63221.5	197237	214429	214440	188892	189920	221998	205391	190261	208569	206692	119036	229691	197290	53125.4	173993	216872	206911	206528	142018	145742	213876	136698	71716.8	218275	216766	227471	243240	205053
98.962@0.29	127147	163964	133543	82471.6	124915	88018.1	146114	92091	93879.9	98789.9	24127	107898	155315	96660.8	108455	120972	107090	131398	118324	102219	127214	60421.6	117277	110478	111588	144875	119603	95688.8	98103.6	98074.5	99302.6	99676.2	93166.9	132767	166455	116780	96698.6	136981	97866.5	106345	121934	98040	97019.8	92565.2	98570.5	117511	122721	130161	115087
98.962@1.05	25268.5	28239.6	35542.7	37482.9	40144.5	35451.9	39938.2	34150.6	39397.7	51056.4	31365.4	38582.6	27949.9	32428.9	34992.4	24542.3	47209	36223.8	41526.8	34021.4	39282.4	36571.9	35393.8	33125.6	33549.7	36845.1	31523.9	35689.5	35082.4	43463.8	32588.2	30351.2	40411.4	30870.5	29295.1	26023.5	36097.3	29677.1	43607.7	43480.5	45552.6	36165.6	40335.6	33235	29126.8	31763.9	35678.4	33172.1	33324
98.985@1.31	22166414	22536172	22812266	20629124	21335056	21068072	20779624	21026724	21066930	20326280	20331206	20222414	20227362	20275918	20372894	19955320	20084116	20237222	19525150	19688824	19769188	19330116	19453968	19556894	19257530	19199088	19450080	19720118	19617862	20058816	19198822	19790666	19809216	20156984	20121930	20348234	18744906	19048372	19345082	18808678	18938480	19060552	18201132	18692070	18712748	18140036	18499540	18512808	18115576
98.985@11.62	33476.3	22484.3	30366.6	45211.9	42085.9	49821.1	69704.1	64140.3	79652.4	89480.5	91687.1	116895	126707	88468	147084	144257	111123	142862	139773	177443	149382	182805	159225	218161	214220	198186	263725	241412	251947	290341	285286	288309	351444	38616.5	40909.9	36452.7	45245.1	47133.8	48457.8	66779.1	66852	67208.4	94169.6	92010.7	92003.6	118258	113703	99838.2	117117
99.014@0.34	263819	353094	228769	199361	134009	291778	283354	315107	171629	158109	152465	230714	338576	189360	243416	205542	168120	228686	217274	72132.8	162815	189917	164078	212332	199409	224589	223157	83298.3	92705.3	23701	30228	124039	32663.5	235515	369305	254885	223603	207636	148679	235169	241425	189459	196836	27216.9	164145	225216	42543.2	310023	39295.4
99.056@15.31	320053	209269	206126	314948	223941	148950	296339	610974	381443	214779	225674	195993	440291	232031	553513	239482	221068	138805	328881	243839	515784	244181	610698	694576	728702	499449	663013	521443	520701	528915	291696	682018	211085	239330	775456	263985	323929	312180	221172	740548	601051	499788	515124	302002	402260	613496	214552	268449	272112
99.056@16.03	4242660	3.7589e+06	4366700	4805878	3010964	2958216	1.71593e+06	5.07642e+06	5205284	5183800	4797656	5159663	4.89048e+06	5.36995e+06	5208701	5511883	5157893	5.41706e+06	5.07748e+06	5090241	4965217	5079368	5.42989e+06	3.87631e+06	5.16939e+06	5.36192e+06	5.28151e+06	4947640	2.98519e+06	5.73658e+06	5062874	5308531	5.64898e+06	1.62026e+06	1.39005e+06	5.06459e+06	2.78573e+06	3706208	5.05726e+06	5.12929e+06	5350404	5.04319e+06	5.10349e+06	5502601	3.79094e+06	5311255	5476206	5.10155e+06	5635059
99.056@15.41	74230	98221.5	234407	114880	188903	148950	149336	492793	383532	618718	198968	541774	692414	150704	485954	239482	728309	645074	259870	216562	227696	564219	301541	1.60925e+06	232617	563785	718050	490538	1.46005e+06	545807	240829	643192	210153	75736.5	739167	263985	489585	1.15982e+06	197909	443990	252693	555050	775509	566987	1.46137e+06	448290	214552	613239	729526
99.056@15.58	74230	159666	330410	316287	1961955	2.28396e+06	3.06381e+06	178405	191727	277553	651108	675035	390644	601824	184798	208223	322794	538341	598686	629309	411729	256459	375036	625477	205232	695619	241088	494156	674811	459412	633720	292183	505959	497099	159054	433072	2.43346e+06	685211	471936	265277	648909	460438	567085	836235	348999	573574	622250	281232	506586
99.056@15.71	639022	207490	331761	350239	360734	268004	855913	557936	432931	327646	734226	422163	161755	821328	258019	417593	841318	369198	114258	397573	381102	1.02054e+06	453759	698308	945220	803918	251755	706090	621988	324161	260452	512229	803592	300265	159054	890445	319855	902318	217910	408718	437531	642040	416805	730414	756313	429340	276678	441750	269948
99.056@15.82	393960	223251	652102	430996	296730	828349	386288	270886	930497	495290	214924	772331	234400	940039	612464	927272	849125	319028	410244	472884	567424	205539	591499	768741	471504	833521	251755	741018	566108	601697	423210	467253	304193	3.25944e+06	2.05984e+06	426439	199980	388015	595590	910279	268448	693799	534454	812229	561742	572162	553607	778523	812609
99.056@0.37	431120	302591	347372	227103	1.67513e+06	1.91819e+06	287172	336349	392621	233220	585904	324661	469213	390700	343875	393561	413108	328696	370827	1.64768e+06	348823	238099	1.46637e+06	385540	377519	354491	414766	488678	364861	586853	378052	467348	408346	310350	408181	504471	255415	1.79164e+06	1.77358e+06	368628	325222	373676	407135	356665	352897	439706	1.52508e+06	338480	362223
99.057@0.2	1.08283e+06	747742	318608	775486	864041	851937	1.03668e+06	771799	596581	1.01907e+06	943032	448568	1.09319e+06	1.09974e+06	1.04096e+06	1.15996e+06	1.00674e+06	448977	1.16053e+06	196043	160902	1.12976e+06	794643	1149301	1.09749e+06	1091310	199625	1.16251e+06	1.28687e+06	1.0468e+06	1218842	221146	225464	905300	933152	318707	732076	1.1135e+06	1.07966e+06	1.04321e+06	99095.6	99826	890844	737967	970617	1.12118e+06	618901	1.10768e+06	1.08885e+06
99.081@1.88	29793.2	1000	16891.4	10888	1000	10101.8	1000	15503.5	22327.7	19514.2	25220.8	10578.8	20611.3	13696.2	16973	18296.9	22472.6	1000	16813.8	22674.5	23268.1	17773.8	18180.3	1000	23396.2	14818	11513.6	10385.3	10530	18533.6	18588	11165.7	12417.2	10840.8	11057.3	14243	1000	1000	1000	17855.3	2.08628e+06	1000	12198.2	1000	22140.1	12364.2	16417.6	19877.4	18379.1
99.092@0.2	30099.8	34165	63189.1	111476	63662.8	153680	93272	111601	93597.1	50542	98025.6	107190	125453	36857.8	93343.5	55799.9	51023.4	80915.9	71460.3	48664.5	42779.2	171700	52833.5	133957	84197.9	143904	117662	23526.2	34934.2	168709	56630.6	170878	119529	23390.5	22831.8	49677.2	138646	48829.6	47161.2	68351.3	53341.2	62369.6	48642.5	124392	63323	57599.5	161569	56993.5	38177.8
99.092@15.31	14781.8	10875.8	1000	34266.4	30779	28429.8	106273	62249	292011	29083.7	109320	51661.4	37097.3	210637	48899.4	63092.2	60701.8	50449.7	46226	61978.4	176246	69905.5	249181	36287.3	140910	234900	319624	88534.1	58620	26179.7	60639.7	215379	285701	1000	12455	12998.7	44274.2	35155.6	40242.2	124589	111024	83209.1	92324.9	135573	257802	61590	86184.7	29709.9	352913
99.092@15.47	18840.8	1000	14605.8	137940	133930	61146	88376.7	43798.5	72241.6	334315	111885	124598	60263.2	144581	976871	313442	358961	53266.7	470009	346592	131386	207127	24799.8	81226.7	372643	314127	112237	93694.6	240495	61843.8	179677	69076.9	72933.4	16899.2	12703.7	1000	100922	57872.5	68569.8	99968	54394.8	43180.6	364568	70315.4	74689.7	54409.3	64121.7	396774	101263
99.092@15.59	24879.1	1000	14605.8	83427.1	92406.1	115141	33408.8	49149.3	109451	56360.3	93775.4	157261	84295.4	183126	199128	41367	95608	145120	158036	46079.1	93218.6	171876	155329	71036.2	668440	283315	131972	56821.3	75986.7	198188	45780	166035	78135.9	11997.2	1000	1000	120313	104176	25085.3	34416.8	41331.9	44559.9	319493	91603.4	97969.4	51352.9	56117.4	119217	136662
99.092@15.74	27552.6	11734	26600	215961	165687	63579.8	74181.8	66977.5	109184	278741	676922	769926	699663	173982	46451.7	535988	87688.6	115252	137893	79967.3	99717.8	1.27049e+06	425316	198586	136499	123885	167117	1171574	155175	45812.8	52871.6	721021	182690	16157.8	32836.9	28107	39500.5	140993	75033.5	96130.2	54049.8	436210	105322	162710	252979	103059	71004.5	404974	208723
99.513@0.29	1.89068e+06	1.92875e+06	1.9416e+06	415019	604928	1.22736e+06	1.51455e+06	1532054	1236306	1.33387e+06	1.20314e+06	867249	1.64472e+06	1376001	1.4846e+06	1.47759e+06	1477156	1.54974e+06	1.442e+06	1.21834e+06	1.44467e+06	1.45694e+06	1.41402e+06	1.50235e+06	1.48673e+06	1.58344e+06	1.43322e+06	974315	992500	914457	977965	1.06325e+06	1.04668e+06	1.8394e+06	1.84258e+06	1.67618e+06	1.11761e+06	1.25602e+06	695980	1.3758e+06	1.52267e+06	1.36454e+06	1255658	1.26319e+06	1.395e+06	1.51291e+06	1.32574e+06	1.66633e+06	1.43379e+06
100.025@1.05	365501	408230	430392	404330	440289	418734	423531	415332	404708	417139	412811	426227	427723	418788	439075	390918	446111	406887	411472	438709	432530	407450	457342	426886	442281	439693	667951	463158	478261	487066	474415	487586	536441	685801	700139	703500	676218	706376	665801	664296	730063	695828	684206	704590	708027	704898	756935	713723	719441
100.056@0.17	265651	251215	212167	105989	106207	254219	114242	159748	139133	129996	185755	124602	119115	164623	106218	83698.3	107073	99699.4	86118	104094	82861.4	100990	158715	96431.6	173336	87505.6	100576	160141	303606	128996	201449	113490	107678	119897	112482	205604	227489	133384	147796	97302.3	171791	179546	105748	143208	111201	104144	181980	113762	108878
100.064@15.87	517512	32750.7	95662.2	68717.3	82425.4	59524.9	54561.2	143088	147300	135052	83109.8	103064	100281	99472.4	69191.6	147071	372392	691640	70651.9	94637.6	163946	576382	131187	93626.4	409987	140683	156644	73882.4	296864	378142	65957.3	105314	150932	57847.2	104905	49481	145493	95416.5	137692	86329.6	43553.1	103282	625712	852269	430489	170264	778708	157787	303211
100.065@15.73	69243.9	230726	128107	80806.1	267737	47761.2	477401	94341	390757	238237	750029	502330	153301	639592	103363	134086	64819.8	123336	57203.2	186128	116211	42292.2	743930	533930	100947	72914.8	69532.7	66610.2	62522.2	92418.3	116663	204969	93065.8	94483.6	301952	266049	36830.7	116708	103026	134079	167811	577744	48256.2	77700.7	72526.6	91629.2	85410.1	60469.4	542612
100.065@15.57	43310.6	48044.3	135840	115759	45314.6	76484.3	71571.8	489578	42406.7	78804.1	121976	41339.7	305352	55046.4	81131.8	428664	384066	128841	289216	341284	178447	31032	66744.9	77696.4	87743.5	492840	34070.2	51539.1	57444.1	114276	58346.5	68830.6	92856.3	164448	52350.9	142217	97491.7	62208.4	206940	403624	182514	75892.9	46908.6	37244.7	128760	151315	61341.4	86265.6	93548.4
100.066@15.43	32011.5	105591	137597	35205.5	31325	62615.2	98235.5	81630.1	436498	312230	80945.3	55955.6	37240.5	49600.9	318673	235583	61356	115228	95204.5	81335.5	65130	50783.6	116371	49914.9	385154	105693	101588	96772.2	67003.6	83915.1	59550.5	381880	71061.3	46024.6	39570.4	54123.8	78881.3	134279	364438	98880.8	64496.7	44155.4	70008.5	38173.4	167754	115725	29046.2	42650.4	54740
100.067@15.27	22669.3	75095.6	45435.9	121566	31325	46326.5	66705.8	39550.4	81903.3	59019.1	62058.9	66098.3	182236	64737.3	116478	82149.2	85458.1	148549	35755.5	108236	224838	136468	132655	45599.1	44731.3	117896	69111.2	40298.9	59853.2	85480.5	48673	48292.7	52377.9	56245.1	75391.3	36735.8	75792.6	37456.9	47214.8	48062.1	238158	46457.7	62208	27319.4	72013.2	76096.7	31170.9	70799.4	59678.4
100.071@0.37	117776	152943	132884	99381.8	123141	122583	154552	122750	182926	129323	119389	90068.6	168883	206331	205173	183560	237295	181475	190792	180787	191910	124347	175810	146820	222556	148074	206165	203212	95657.3	150753	145267	102669	152071	143161	153022	150134	141684	49179.9	148075	173392	152227	159767	150975	156322	197101	163951	168879	207360	194039
100.113@15.76	68123.8	215875	51969	46640.1	76957.5	72279	49502	93716	333378	53745.4	65786.9	74157.9	62657.7	49418.5	46070.6	85938	415335	81533.2	81618	297539	277735	61465.2	80877.8	313214	75011.1	307818	51827.1	41153	18121.5	220569	28945.5	253350	45380	47326.5	75365.4	51307.7	61542.3	646574	57380.3	104072	60354.2	82083.2	105180	493249	58835.5	457944	446604	94742.3	423738
100.113@15.93	103359	84155.8	99018.4	90147.6	437310	109083	79919.1	60695.5	47973.3	511597	39854.8	55515.1	32067.3	417360	88249.1	38634.2	48425.9	55054.7	311159	90336.5	48127.3	104296	60858.5	95889.4	345182	26001.1	351056	27070.6	51473.5	63763.6	81443.7	55562.6	24922.3	264701	106789	440854	637576	86276.2	508926	47874	392079	583924	511376	27370.5	106215	95069	23551.1	54507.7	37263.8
100.113@0.36	18369.1	36322.6	58971	51415.2	42647.2	51135	50097.2	46779.6	31277.7	30381.9	43690.3	30222.7	52445.5	44125.1	23551.5	55511.1	23611.8	50591.2	23540.8	30092.4	17369.7	31973.6	38471.6	33585.2	31577.5	46229.7	31709	35982.2	74961.1	41219.7	66619.1	36821.6	49081.9	102931	66354.4	66918	75303.6	37382.9	39514.3	54964.9	65670.2	52591	61538	41499.2	63807.6	72085.9	27871.9	54249.6	34729.6
100.113@5.96	54789.6	54569.3	15271.2	50225.6	20250.4	42321.3	13417.9	43460.9	16256.1	47613.5	17743.6	47512.4	15333.1	46015.2	17920.8	43103.8	19239.5	48910.8	1000	39415.2	43800.9	43596.3	38055.1	1000	43799.4	22656	45930.9	1000	39956	1000	39258	1000	44242	52949	29798.9	51301.4	11821.9	40203.8	44373.6	45308.5	49409	42665.1	41705.6	46146.9	43441.3	1000	42577.7	12152.1	46577.2
100.113@0.24	175931	259620	270298	56463.6	225311	109355	170385	298684	194935	207833	233624	123857	128572	23560.8	65794.4	35083.7	49787.8	233619	165688	160061	163838	48746.2	172731	112809	92601.6	51838.3	187929	162244	59299	39205.3	92182	96601.6	70148.5	270768	240429	263903	115961	228006	40942.6	181557	210663	205419	173543	176776	211905	181331	111968	205147	161781
100.113@5.82	11519.7	30928.2	57501.2	16691.5	53441.1	19252.7	44569.9	17099.4	44822.4	15895.8	46770.1	1000	43456.7	1000	44899.5	11985.5	48469.7	10684	45931.5	1000	1000	12335.2	1000	45924.7	1000	41693.7	10594.4	43448.8	13018.2	43887.3	1000	37670.2	1000	16793.5	53869	12966.9	43792.2	12383.8	11932.3	1000	1000	1000	16078.1	1000	12877	41635.2	1000	42788.3	1000
100.957@0.29	1000	1000	18949.6	1000	1000	1000	1000	13303.3	14386.6	1000	1000	31828.3	42074.9	20353.2	34278.2	41880.3	21248.5	33502.8	34191.6	28879.5	23896.3	33869.3	25669.5	31075.4	23507.2	39053.3	45276.8	35834.7	26365	27082	39718.3	27511.4	30393.7	1000	1000	1000	1000	22958.8	10394.4	27695.4	17110.7	24477	22026.5	24751.4	15764.7	37736.9	10842.8	34081.7	26297.4
100.967@1.05	26312.9	33902.6	41555	44223.3	39209.4	45940.5	59527.5	46414.3	47472.8	61406.2	36553.5	51875.5	37739.8	40322.8	47696.5	38080	59273.9	39085.4	53319.4	47223.5	49128.8	43958.2	52482.6	45347.5	41667.5	40047.6	42884.8	44118.7	43816.9	47007	40328.4	34146.4	56596.6	36440.4	29185.6	32796.2	45526.4	36932.1	37608.3	49503.3	52503.3	39486.6	37767.6	37717.8	35925.6	43692.9	48961.2	37626.6	38171.6
100.989@1.32	144331	124503	146450	137503	136003	135413	136579	140514	142320	133321	143219	134664	140371	135342	140240	135759	138704	136258	114940	121983	133426	135207	129506	129010	123511	130880	131066	128497	137299	134712	127660	130489	131861	131883	133772	118231	120132	122047	122528	117348	113061	127870	116983	113305	118647	113760	120999	126530	117785
101.035@15.98	1.46212e+06	75456.1	243558	1.68578e+06	1.77427e+06	1699636	1.78146e+06	1.72655e+06	1.84789e+06	1.80061e+06	1.68015e+06	1.73213e+06	1.77899e+06	1.82353e+06	1.83366e+06	1.82024e+06	1.75319e+06	1.68584e+06	271799	241095	1.7295e+06	252920	1.81577e+06	1.87262e+06	304378	1.7996e+06	1.8547e+06	274200	1087858	1853431	1.96371e+06	282594	1.78806e+06	1.27015e+06	1.38822e+06	1.45746e+06	1.68822e+06	1.75225e+06	223414	1.78901e+06	1.85048e+06	1.83046e+06	1.8839e+06	1.69236e+06	1.80704e+06	1.79341e+06	174240	41453.9	1.70496e+06
101.035@15.7	110744	92493.1	185924	361993	323204	277648	126250	387109	251899	391235	365162	148852	301000	100004	142280	379873	316378	262543	1.77684e+06	333568	340111	1.80642e+06	168481	372423	1.87647e+06	234345	339087	406455	186836	367545	62716.7	162397	335825	315938	268054	187903	254159	118801	337386	232435	366563	206112	197499	338318	336676	254553	1.82867e+06	204846	311455
101.035@15.86	84897.9	112951	285263	117892	249929	307602	206137	348579	330717	340420	356846	212757	181303	138764	351667	210980	240489	120672	369967	147811	384687	340247	388432	393972	105161	195887	356086	1.86142e+06	356496	372047	123165	1.89094e+06	193641	213549	112690	165105	271714	241255	1.55317e+06	400370	317433	367474	235257	192097	399081	249195	60702.3	1.80055e+06	276321
101.035@0.29	37227	57723.8	97635.1	542580	576752	672913	68781.4	347191	350160	306781	328409	363440	339493	56261.6	292822	141423	305176	300204	137180	268807	361429	246405	161043	242955	71966.5	64789.6	263471	348198	348865	161238	356860	370988	119474	245696	275519	324211	559116	538703	558945	365393	63760.1	302821	331604	275901	327407	282524	65238.3	367787	270937
101.069@1.24	226085	227160	230207	188004	186569	188883	119261	110776	110462	66527.1	76520.7	63686.6	32630.3	25377.5	30246	30312.4	45994.9	49610.7	47322.4	53967.7	28408.7	18789.4	24772.5	26251	49347.9	42158.7	45721.3	40225.2	33303	30614.6	22097	13690.7	35349.2	170105	174142	175876	146235	130590	140388	113273	101697	100146	82541.3	104432	95578.9	51210.1	61640.6	49282.1	56042.7
101.071@0.26	3978777	3.80089e+06	3906224	2.83158e+06	2.89468e+06	2.85346e+06	4371808	4369819	4408726	4631902	4770006	4657162	5.1401e+06	4.88783e+06	5113585	5.00241e+06	4.46596e+06	5155996	4853226	4751069	4863038	4.61799e+06	4.89725e+06	4142754	4.01894e+06	4.96166e+06	5008661	6159106	5.12851e+06	3.78059e+06	6.52182e+06	6.81634e+06	6.04219e+06	3.95178e+06	3612786	3824309	2.90529e+06	2.36816e+06	2399227	4.33258e+06	4336466	4.49862e+06	4352149	4574310	4.67147e+06	4.43752e+06	4.70725e+06	4.87435e+06	4853238
101.071@15.73	122734	123606	150722	402268	150455	196281	67355.7	417539	134643	2.56901e+06	349804	326642	103632	400591	557765	220592	369902	311457	271700	295161	316117	601420	2649988	441887	166282	2782753	581723	3.44959e+06	481792	276437	573157	3.58292e+06	548075	206023	270591	105621	243803	423705	1.87333e+06	405828	390486	162799	217590	272833	2.46476e+06	378808	352625	421296	442174
101.071@15.88	237603	222556	273928	246864	165090	131146	133199	234593	128255	508078	451186	466422	103632	2.78869e+06	568880	2714266	2.62115e+06	1.69683e+06	502050	349193	2738094	108907	526964	222107	404329	384826	474197	195953	194765	218593	733482	464475	488168	252675	138741	59509.2	333454	291006	248561	406039	193935	339309	469920	2.56597e+06	473768	473585	298025	475658	1.80133e+06
101.107@0.19	14562.9	1000	10246.5	18027.1	13478.3	12891.4	15500	24161.7	32847.1	17858.1	38564.3	34850.7	36471	49944.7	18509.1	32847.1	18012.1	20868.7	18752.1	26265.9	35377.6	45248	27394.7	14157.1	25343	44352.1	42084.5	19727	18263	29417	1000	40747.4	13841.2	10021	1000	12406.8	40740.7	23221.6	16934.6	27027	28902	12706.8	17353	28548.9	27088.8	25615	15258.9	27035.2	19525.2
101.108@15.33	1000	1000	1000	1000	1000	1000	14246.5	12509.9	50220.4	1000	20096.2	28563.3	22893.8	46071	23189.6	20183.3	40468.8	1000	13432.5	26261.1	33768.8	53195.4	12580.4	52841.6	34842.2	33437.3	57091.3	29367.8	28232.5	11919.5	38668.7	34578.2	96464.2	1000	1000	1000	1000	1000	1000	20473.9	15212.1	15980.2	23748.3	34527.7	56599.7	19208.8	46256.8	52082.4	70835.9
101.108@15.5	1000	1000	1000	11329.8	16358.2	1000	20523.3	1000	28582.5	41166.7	45701.2	55487.7	30959.7	26035.3	38261.3	49033.7	25908.2	90438	116745	61775.5	90554	38975.1	25573.4	63473.1	46923.6	140475	127697	81074.7	63936.3	59671.8	372052	11783	33957	1000	1000	1000	10313.2	1000	21716.6	17179.1	19969.8	19955.7	36137.7	32177.2	31972	17876.1	18617	37162.2	24464.8
101.108@15.68	1000	1000	1000	1000	13460.9	31422.3	19250.3	23758.5	42837.9	136768	189394	44396.5	81135.1	72287.5	89845.1	37862.9	35452	64211.5	79287.4	16662.5	35761.7	58635.3	59418.3	38887.8	298852	36061.4	56594.7	103108	71052	43489.3	58045.7	313003	48786.7	1000	1000	1000	15193.6	18908.8	19383	26766.7	35106.4	26277.6	53049.3	35977.6	178840	35302.4	42456.1	158529	178440
101.108@15.83	1000	1000	1000	13887.6	22893.8	30332.9	25514.3	26770.4	18492.9	45548.5	35573.9	67318.9	27197.1	20440.9	28603.9	214822	42751.2	31771.4	97581.6	39059.7	344864	45826.2	55925.8	32046.6	59382.1	181255	24602.8	32309.7	73319	41043	42809.7	53818.4	31749.9	1000	1000	1000	13927.2	10399.3	12285.4	26950.7	36411.5	48369.7	68943.2	67972	46462.6	21369.5	49155.5	24699.8	69372.7
102.047@5.28	168333	188876	194273	194712	213775	215770	184887	212466	187755	184260	194883	204193	175703	187860	176735	169114	160593	167977	153640	160194	163620	154487	170239	158593	158514	149899	168241	141208	159223	149557	139790	164799	173350	301697	297996	299484	297928	333212	331166	319456	325703	343440	308208	315152	322749	293088	319947	301790	292859
102.055@1.23	1940655	1.94402e+06	1.95252e+06	1.89905e+06	1.92186e+06	1.89984e+06	1.88568e+06	1.86018e+06	1.84351e+06	1.76799e+06	1.76265e+06	1.764e+06	1589318	1.63694e+06	1.61747e+06	1.45358e+06	1.44889e+06	1.44262e+06	1.33241e+06	1334453	1.33426e+06	1.26046e+06	1.25848e+06	1.27014e+06	1.30187e+06	1.28701e+06	1.34188e+06	1.33861e+06	1.31598e+06	1.34189e+06	1.32761e+06	1.32546e+06	1.36036e+06	2.04966e+06	2.06067e+06	2.07459e+06	2.02348e+06	2039018	2013880	1.97919e+06	2.01937e+06	2.03615e+06	1.89607e+06	1.92312e+06	1.91864e+06	1830011	1.8511e+06	1.79966e+06	1.70811e+06
102.055@1.55	324241	344721	348330	338781	349995	346024	339651	321620	336488	319476	308011	301315	289786	376833	292553	254182	258758	257835	251437	249141	240202	248412	258252	238895	244082	240932	239882	249660	239450	252665	231701	249803	245828	351318	326892	357145	348529	356253	381090	335970	354635	330888	346010	352903	332155	335500	346871	342657	325906
102.067@0.17	104203	64859.4	91621.9	46502.8	70636.1	44385.8	49784.1	71852.2	49250	59000.3	180607	47398.3	53672.6	46631.8	60321.3	64222.3	63409	52230.2	60999.7	57872.5	63679.3	61199.3	96644.6	68504.5	59215.2	42782	67213.4	65980.9	46541.3	71768.3	55724.2	72593.5	46939	42318.5	23162.9	66383.6	47398.2	56815	53299.6	60105.4	64615.9	60853.3	55006.3	47300.9	57132	61679.1	51139.2	59287.7	58251.9
102.091@0.34	346954	487206	791328	103775	728478	726248	2.86611e+06	108406	1.71259e+06	95281.8	133629	2.59979e+06	651838	413018	544868	268622	632385	528718	2.36615e+06	2.38438e+06	544219	2443685	502159	482765	479933	481109	358805	449966	445949	476048	1980977	1974540	1987042	463030	1.16153e+06	1.46266e+06	118747	635497	733697	276011	2174032	367725	559331	329043	2602776	534800	200754	582866	2.50465e+06
102.128@15.42	342836580	347690660	320138100	1307674800	209870600	201531410	151185900	160133150	145772800	120254856	113964056	113889144	87372170	545626750	86376450	86286400	89462300	81138430	75270120	68354800	69083080	64622940	69441650	64800870	52599596	332473700	330966080	306251360	307541900	52267050	50544990	46882228	43682780	286995400	318830900	303555740	190015170	1248343700	187218610	155779380	162049460	155090610	126520110	127087180	116409510	106869860	637252500	105701600	81878880
102.128@15.54	318582700	318507000	308110500	185261040	191076830	207980830	153676340	942094140	141027360	123361700	751613600	131161790	90972480	91307640	91421500	541079360	534519650	88353416	79126090	434750900	73126390	66926732	67307620	66767948	54342584	60418200	43448090	56819670	42603216	52779880	276988900	49433740	45187510	76718800	298005220	278910050	196936600	159847100	205924800	149229940	157832480	145141800	114849050	126034210	122540290	97170376	105396990	107409960	90422240
102.128@15.66	302765860	313564320	294946140	195034940	201127230	192444000	145483730	146190500	149023630	115536344	119783890	119504490	91072070	81651176	535430140	83253520	82660824	522004320	78888744	67907150	75377270	62907012	65851132	60992990	61960484	56781480	54664444	51294296	55617690	54300944	48888396	48155356	47813000	272324480	288532800	267628860	193977000	187433250	188388160	154363310	155616830	154549280	121232380	127897220	110976380	626211500	111757180	600202240	88587740
102.128@15.81	267978640	296623230	289844800	207004690	197898510	193336420	144679580	152697040	149925440	747902600	125768360	118186790	69683670	64248160	87971520	96296856	93072200	81327050	72616824	77449224	69712536	69448030	65822920	63447636	350900160	52538130	56345350	54298370	57370908	53601876	48375140	281066940	254888430	290526800	273036500	273528450	192361840	187041650	196099180	136385680	132577176	132742460	129493710	118798040	113878664	103926184	107491440	94206000	71036660
102.128@15.94	202423840	206860320	209906720	137277260	124431400	50643412	968037900	105250180	107018660	88665850	81419990	83468760	60111056	63204240	61395190	60729308	54099972	59405176	49163890	51539536	53635920	28011954	42647620	43306870	41216740	37075536	36691920	36775240	38750720	35181090	33867770	37391670	31461714	201742180	183137250	202365360	82913270	135490270	128107960	111517160	104856900	99518360	90573870	80044056	81544680	76321420	72021680	74873870	62650184
102.128@13.5	194651740	183693550	181031360	130959020	132960220	124847890	103382730	97515590	102088230	89939830	90370990	86753100	66122504	63295264	68595390	61583740	61902344	60013624	53613450	59210390	58152356	47905230	48713724	49166864	45875772	43653520	43487772	38242800	40944396	43183612	35310016	36199348	35452420	181639340	183125470	178820380	136536450	124248410	123330340	102973010	105934640	99439110	88430616	88570830	79446050	75538510	73804900	81132650	70460470
102.128@13.63	206998060	195201040	198972900	150088540	138124350	126678856	109655070	100557450	110406290	85926536	86889950	90031230	67590050	62841890	63759052	63187944	64967812	65413604	55494664	58036236	411508100	361012700	369688500	53450000	320004480	43211630	310403840	250226850	255051580	259892620	230449310	228671980	216099100	197831820	186395950	172360940	143086300	129511176	122999970	103557416	112196430	112286040	83684240	88296840	93442440	79205140	80085180	76714220	64391130
102.128@0.35	154974960	147791870	165011980	33275362	48800360	30851736	66289280	79594330	69696260	62760880	60262156	59198684	47255276	41290760	43771130	49609020	46307052	48986204	39755956	34673116	35133812	34223410	29977546	35312852	26557410	27785616	29084118	23486198	29640538	23495382	30661886	25392038	26049372	165235660	138445470	134436220	29634928	23008932	26027334	76820296	75255040	75417464	49075124	59917344	53669496	52052588	56713650	55648220	42712800
102.161@13.34	64629.6	62725.5	115637	32096.4	49339	26466.4	15785.6	29107.4	20893.2	11667.1	15392.8	32829.8	20655	97083.3	34375.4	32831.7	123419	16542.4	36515.2	15174.7	17190.5	134094	13772.2	38071.9	10860.2	1000	23072.8	18940	13058.5	14192.5	89533.8	102208	17954.2	146900	71388.9	29953.8	59112.7	31319.8	36742.1	63997.6	58739.8	36615.4	15546.5	31077.6	34262.6	34823	47375.8	19304.9	24801.3
102.161@13.69	49216.6	64777	76712.7	43699.9	20415.8	64608.5	52741.5	461358	291019	34378	382228	37663.9	119325	19402.4	112760	46377.1	138700	11593.7	263855	1000	25673.1	19039.2	13574.5	334691	12234	63716.4	26546.2	38367.4	24205.2	16302.7	18139	27294	38217.7	73222.9	45464.3	49846.5	24598	31906.3	45956.5	31895.9	17473	55770.4	71705.7	63646.6	387245	64290.7	60994.8	358193	10597.6
102.161@13.54	50115.1	97090.7	20914.1	64583.3	21664.9	75781.3	52855.6	22383.7	36124.8	22554.5	38594.4	22059.6	184512	16995.8	21919.5	25651.8	14603.8	1000	11193.3	214283	265898	1000	115415	19971.6	10893.9	117824	22237.9	18024.1	103329	1000	85994.6	1000	29719.5	28582.9	57760.2	44548.1	40553.4	27757.4	80754.3	28965.2	34041.8	27866.1	44532.3	10417.1	43606.3	10412.7	360365	23429.9	328626
102.161@15.63	118765	709856	71879.7	890397	105862	429865	68459.1	41476.5	22359.6	15124	39729.7	36442.1	22875.5	10766.2	11308.4	11646.4	38608.5	40343.2	1000	47171.5	23180.7	29858.1	14324.7	10100.1	16177.9	1000	1000	1000	1000	1000	1000	1000	1000	122742	127393	1.40733e+06	63277	47493.3	857660	121602	19938.6	13618.7	33916.9	17249.5	25466.3	10927.3	261882	34070.2	29383.7
102.161@15.34	638349	74756.8	952976	131053	904882	217157	40158.2	298350	28068.3	210349	92258.6	51759.4	20159.6	22330.6	12672.8	10225.6	39434.2	28403.3	1000	11689.5	13829.8	1000	39267.6	15335.5	1000	1000	1000	1000	1000	1000	1000	1000	1000	917085	1.24228e+06	156346	406207	607535	107738	21690.8	32633.3	130715	51012.6	39709.1	32396.1	47225.9	19380.8	61404.3	42062
102.971@4.85	328099	298678	318087	358104	304661	352715	3.35521e+06	336198	3.00234e+06	367376	345447	331790	3.50742e+06	373139	373894	350994	334390	350424	3.18668e+06	370552	365049	361593	325731	3.02521e+06	351646	3.19763e+06	362854	3297839	353412	335195	407108	3.2835e+06	377873	295331	317214	344836	2.90544e+06	320571	333813	332317	3.10689e+06	322594	350951	325302	327579	3402441	365681	3.0639e+06	367799
102.971@5.03	3.57352e+06	3255948	2.86462e+06	3.49843e+06	2.95315e+06	3.27961e+06	325749	3.49981e+06	325158	3607401	3019488	3.55118e+06	377260	3597705	3.2469e+06	3826548	344267	3.65661e+06	332945	3.66073e+06	3624426	3.7095e+06	3.48965e+06	325112	3.75175e+06	351258	3.73378e+06	337658	3.67899e+06	352693	4.08571e+06	337851	3717359	3.11518e+06	2.71376e+06	3.22543e+06	327837	3.35015e+06	3.38422e+06	3.48874e+06	358047	3.37931e+06	3.40011e+06	3.45402e+06	3.45188e+06	379432	3.68014e+06	311317	3.502e+06
102.971@1.06	403466	351562	367638	357033	365082	340782	326549	395182	310885	309161	309438	314241	286123	276348	277438	358924	294282	293018	365406	281340	277473	285216	312850	284437	291135	385095	653740	299333	313556	380555	301768	292522	305779	429927	416538	478190	455593	404055	744812	366517	409523	385132	319449	376878	369373	324475	339959	338922	340791
103.043@1.54	28691.4	30920.6	1000	11131.2	41520.9	42265.6	25107.3	40412.3	26442.1	28680.7	16376.7	19588.4	21536.2	1000	25886.2	25064.3	23393.5	10865.6	24680.4	1000	1000	19114.6	1000	1000	14202.1	1000	1000	1000	1000	1000	1000	1000	1000	357608	372482	375992	240839	372558	398966	383327	368601	367456	222132	348647	356652	187647	369593	227792	194171
103.054@2.19	68778.2	61529.7	55962.3	110274	68468.1	32866.6	119147	63479.9	109608	113578	122002	139434	101716	104157	109460	104802	114124	101576	98360.1	33471.1	104709	88625	104090	101605	99444.5	96142.8	52551.6	89643.7	38631.2	87904.4	86223.1	93438.1	95204.8	37927.8	31429.3	102780	62693.1	72264.4	93040.3	79831.8	79390.8	66291.4	90944.8	194330	28192	95041.2	72884.6	48242.4	54595.2
103.054@2.06	67755.4	31445.6	57378.3	43970.9	22146	19689.1	11616.9	44441.3	15467.7	55257.9	32992.6	58633.1	24089.3	46763.5	45479.8	11047.8	47929.1	13836.3	25589.8	34488	54463.5	41949.8	48695.5	49244.8	23980.3	1000	43743.6	44347.4	30556.5	37196	28433.8	14978.5	24700.7	838221	844242	788704	910126	926616	850849	911480	911537	841216	900176	911465	806611	918539	887741	814872	880663
103.055@5.28	6.24651e+06	6.7577e+06	6646966	6.57793e+06	6.72943e+06	6904397	6.15753e+06	6.79804e+06	6.45663e+06	6363008	6240461	6.52954e+06	5637623	6.12568e+06	5957908	5427585	5331453	5578268	4.86011e+06	5.28369e+06	5.45544e+06	5118490	5363194	5160892	5.25789e+06	5.14256e+06	5.54076e+06	4938249	5397614	5239506	5.14175e+06	5.27526e+06	5.77718e+06	9846620	9658814	10106773	9510427	10680947	10545270	10153716	10580192	10599593	10113416	10586457	10231875	9277235	10449047	9506912	9787581
103.055@6.35	19887.6	18853.8	14460.8	1000	1000	16117.4	1000	19453.4	13142.1	1000	11305.3	19192.1	15643.6	17303.1	1000	14970.6	13894.7	1000	1000	15415.4	1000	1000	11704.2	1000	1000	1000	14921.5	11502	1000	1000	1000	1000	12324.8	43959.2	1000	42445.2	18391.8	38264.6	40113	38661.4	37946.2	38713.6	39054.2	39584.6	36159.6	1000	39102.8	21801.1	33727.3
103.087@15.9	1000	1000	1000	1000	1000	1000	1000	15783.1	1000	1000	14063.2	1000	13323.4	21150.9	12077.1	26508.1	29498.2	19592.7	61470.7	12070.8	12439.2	25584.2	13673.5	22607.2	26648.1	24664.2	44866.6	55361.4	24848.7	16314.8	15634.5	1000	13341.3	1000	1000	1000	1000	1000	1000	15402.9	10819.9	14368.9	21412.7	1000	1000	1000	1000	15271.5	30377
103.521@1.75	1000	1000	1000	1000	1000	1000	18881.7	19993.6	17089.6	38048	31262.8	36016.6	50213.4	51799.4	45273.5	53739.1	43134	46904	41508	49583.3	52825.1	53047.4	55388.5	57462.4	51703.4	51567.3	56979.9	51636.4	63014.6	47209.4	62273.4	60212.2	63442.8	1000	1000	1000	1000	15707.7	17848.4	24931.2	23770.6	25564.6	28962.7	28979.9	31973.6	32365.2	33972.5	30712.1	59054.1
103.521@1.54	1000	1000	1000	1000	1000	1000	12286.6	16637.2	39220.8	28125.4	24227.8	21776.3	34868.8	36284.6	32213.6	36045.2	39864.9	35707.2	81072.9	38162.4	35775.2	40455	34499.4	33227.9	41598.7	37745.2	33263.9	95312.3	30760.5	91071.7	36475.2	40052.2	38935.6	1000	1000	1000	1000	1000	1000	11821.7	1000	11026.9	21676.1	1000	14327.6	11115	1000	57190.9	18617.2
104.053@1.55	1.44201e+06	1.52818e+06	1.59585e+06	1.47815e+06	1.58988e+06	1.58332e+06	1436583	1479716	1.49385e+06	1372958	1.41053e+06	1.43434e+06	1.26093e+06	1.28961e+06	1281273	1.08823e+06	1126648	1.09814e+06	998053	996745	1.00791e+06	937014	995600	977497	976415	956704	983801	961607	937915	971612	918639	983235	997972	1.45225e+06	1.46714e+06	1.47576e+06	1442416	1.5188e+06	1.56234e+06	1.41658e+06	1.4807e+06	1.49504e+06	1.37265e+06	1.44422e+06	1.43742e+06	1.33637e+06	1.37259e+06	1.39001e+06	1.27222e+06
104.107@1.18	58776610	61823280	62608636	58584164	62109644	61251224	58028480	60345356	58800136	55692664	56530532	56004924	52464780	54409380	53600044	48444650	50333976	49050450	45077000	46367304	47269550	43927492	44397400	44395956	43395748	44326748	45373264	45108744	46229864	46217612	45203468	46999176	47315668	63505484	64161292	65014976	61684536	64151410	64693850	60921410	63006336	62893760	58129916	60812280	60009656	55903196	57661480	56672580	52794104
104.134@13.68	286010	340202	355174	147231	235151	189441	110962	48813.2	146866	120286	149859	151734	117469	126769	83899.4	733257	88816.7	112489	600851	52874	102332	81665.1	88163.3	88878.9	509243	75091.8	433878	68472	68837.9	80986.4	69793.7	45624.6	63952.2	264515	331844	291110	245608	223979	216104	173434	191760	194726	140720	145378	63575.3	137023	126996	132133	696318
104.134@13.51	350603	320165	311346	246778	217225	224368	195635	183544	161893	940446	158796	153371	118611	695485	45878.7	32022	107031	92026.8	103607	94214	92395.3	63116.8	84718.6	573365	43829.2	80829.6	73298.1	71983.7	79846.7	77609.5	67545.5	66488.8	64086.8	317408	323155	311923	209031	208875	195356	194033	187783	195976	142981	156432	156164	94917.8	129556	123073	112835
104.135@15.38	4.03842e+06	470028	556909	376273	333418	303172	239765	223000	268200	1.23787e+06	1.25531e+06	101822	126785	52898.6	916652	94852	905102	79619.1	22948.9	102668	68556.4	42399.7	96626.8	89240.3	58865.8	68019.2	62707.7	35755.6	47964.9	391782	31781.8	80770.4	70320.4	3.28945e+06	576352	243088	2.039e+06	324010	316546	150671	264989	188066	62796.5	45760.4	179683	184461	159958	93088.3	135637
104.983@5.74	1000	1000	26329	1000	42733.8	1000	49538.9	1000	53182.1	1000	58260.4	1000	37558.1	1000	41469.4	1000	12800.5	1000	1000	1000	1000	1000	1000	1000	1000	1000	1000	1000	1000	1000	1000	1000	1000	1000	25126.3	1000	35613.6	1000	1000	1000	1000	1000	1000	1000	1000	32294.1	1000	32005.2	1000
104.983@5.9	23813	28155	1000	40137.9	1000	43347.8	1000	53580.9	1000	55760.4	1000	54855.6	1000	38618.6	1000	12289.2	1000	13078.3	1000	1000	1000	1000	1000	1000	1000	1000	1000	1000	1000	1000	1000	1000	1000	26136.4	1000	24745	1000	37170.7	40509.9	39297.7	44848.3	44220.4	37780.9	39953.9	42192.3	1000	35580.3	1000	24182.6
105.003@1.06	424133	384252	442300	422075	417077	391158	421868	467156	439732	459750	452280	402742	451390	410504	471448	440479	422811	389721	433290	442182	399950	390098	461685	430731	452934	447317	685213	474219	465167	506966	480155	475401	514071	694288	697712	689829	704164	714590	677539	715195	761238	731028	712428	745132	724185	752437	772479	741951	722799
105.004@4.77	94944.1	97906.8	1.0281e+06	98178.4	108781	97334.9	1.19006e+06	111509	109306	103990	104782	118814	1.32298e+06	123117	109738	127595	1.20374e+06	116392	115391	1.3357e+06	108832	110814	118143	1.15806e+06	119510	1.25787e+06	1.38982e+06	1.74684e+06	157873	158256	184413	170356	170790	1.13469e+06	1.01398e+06	104553	106081	105084	97322.9	113413	1168629	1.24351e+06	118682	113182	112106	1.28215e+06	107833	115440	122140
105.004@4.87	107147	99455.9	99523.5	101581	108220	105326	111533	1.21282e+06	104771	113687	102503	118426	114964	117414	118133	129524	105146	124551	1220363	122917	111718	128466	123310	111228	129665	122815	118103	152489	1.92199e+06	1.73012e+06	2.12765e+06	1.85464e+06	185040	104916	93496	91915.2	91010	108966	110470	103035	113649	118709	115518	118174	117184	124086	112834	1.15588e+06	118738
105.004@4.98	110200	92301.3	105180	1190349	96078.2	106720	112477	116204	1080480	1.30617e+06	1.14382e+06	1267407	122329	127782	1.24997e+06	1.39458e+06	107393	118757	114570	111893	118953	1.36358e+06	110745	115849	128098	116023	123204	159171	153316	148950	170025	162245	2.04249e+06	98150	91837.7	1.14937e+06	1030843	1.16599e+06	1.17581e+06	112746	111549	114856	1.2199e+06	1236016	1.23588e+06	108447	126647	100942	1.29486e+06
105.004@5.08	107370	97504.1	93944	110959	74403.5	1.16022e+06	69207.3	98281.1	80573.8	118995	87999.1	100638	99512.6	1.34513e+06	106865	118541	76386.9	117077	82396.4	118433	114285	112152	1.30439e+06	81995.4	1.42438e+06	97956.1	114249	139054	160248	127006	175450	136646	157285	96304.4	84324.2	101966	50714.9	108105	111802	1.19953e+06	89407.2	110634	112175	112517	100457	97595	1.29497e+06	91748	107958
105.004@4.57	1.24796e+06	1.1614e+06	98428.9	97198.3	1.05937e+06	92723.9	103647	97171.7	102713	110370	110869	97722.4	109448	119815	112479	111201	114319	1.35637e+06	117813	108267	1345598	107061	104184	106222	111954	112409	121283	159889	148300	169169	165928	171087	156982	91235.8	85699.4	98480.7	95819.6	104627	103941	99788.5	104870	113723	101843	99702.4	54557.1	109610	105071	104508	111378
105.057@1.55	47296.2	59908	54700.7	47002	53523.6	50703.7	51098.7	49265.5	47777.6	42701.2	43429.3	50334.5	38536.4	42659.6	42878.9	34455.9	35623.8	36339	29058.9	35952.6	31272	32411	29460.6	35074.5	33629.8	30509.6	34693.7	31437.8	29269	34519.7	28422.9	31154.8	32083.8	43768.2	48734.2	50060	41818.7	51357.1	48592.1	45618.6	44865.3	47392.2	43587.8	47614.2	41546	38876.1	43706.4	45858.1	41931.7
105.07@13.93	65500.5	67210.4	40240.5	77291.8	74975.9	82597.1	102596	93389.9	88302.9	103500	97895.8	114512	111958	111673	106458	105525	99345.6	114199	120136	125001	116516	120184	110224	115424	116921	119266	108839	129258	101798	120505	138444	113133	106937	58116.2	51232.1	61800.2	84317.1	81371.8	83555.6	91318.7	99736.5	89522.6	108249	101887	103094	102492	111014	112361	115286
105.07@14.68	47475.1	60001.2	61529.7	64402	66961.9	66346.3	34364.2	50958.7	64069.8	52970.8	57134.5	68642.6	65094.1	63780	64211.6	71426.3	65995.7	64553.1	71406.6	68531.1	63685.6	54905.9	56042.7	64604.7	66153.8	69091.4	60718.9	85272.5	83393.9	79771.5	119295	107119	95698.6	52484.2	55713	61008.4	66459.5	57782.7	53729.4	65201.7	59773.6	60989.5	60025	62555.2	64190.9	70824.9	63453.8	65396.6	68366.7
105.07@5.08	28693.1	13526	19953.5	16933.1	10479.6	17922.7	10099.2	1000	30588.3	18629.7	24730	14135.5	20193.7	11113.7	22377.4	17199.5	18543.7	20434.3	21521.9	20053.8	19477.4	1000	1000	21870.8	18063.7	12981.1	19612.3	18925.7	1000	21478.5	16536.9	20332.7	11387.9	1000	1000	1000	17338.9	1000	13467.4	1000	1000	1000	1000	10346.6	14070.9	19409.7	10530	15168.9	13062.9
105.07@5.29	63883.2	66967.7	39869.2	49275.9	17003.4	45061.5	11227.1	57810	57840.2	51151.8	26724.1	55889	48318.1	45293.2	57876.6	28554	48417.3	53378.6	48578.8	23834.3	34713.9	41349.2	50857.9	34984.3	30159.8	22377.9	50755.8	45809.7	38316.8	48964.6	51890.5	47822.6	32768	2.67268e+06	2.61106e+06	2.60309e+06	2.51317e+06	3012191	2.73075e+06	2.97563e+06	3.08245e+06	2912982	3017202	3.14424e+06	2.89024e+06	2.75085e+06	3.27086e+06	2665869	3.00013e+06
105.111@1.18	2.68528e+06	2.75963e+06	2.80379e+06	2.59002e+06	2.67004e+06	2.64242e+06	2549108	2.58659e+06	2.61118e+06	2.39361e+06	2.52963e+06	2.52324e+06	2405982	2.43975e+06	2391552	2.23776e+06	2.26005e+06	2.17442e+06	2063590	2.02723e+06	2.19636e+06	1.95168e+06	1964900	2.00055e+06	1.97928e+06	1.93974e+06	1958109	2038726	2.50711e+06	2.04917e+06	2.0714e+06	2.11359e+06	2.08172e+06	3429053	2.8546e+06	2.87839e+06	2.76591e+06	3478234	3.41746e+06	2708062	2.72834e+06	2831232	2.58784e+06	2.6966e+06	2.62599e+06	2513357	2.53444e+06	2476223	2.31945e+06
106.04@0.09	15280.6	1000	11347.3	1000	1000	1000	1000	1000	13942.3	17859.3	13829.9	1000	22544.3	12470.2	1000	14541.5	1000	22517.4	20820.4	24135.6	1000	17441.3	21707.5	10177.7	10882	1000	1000	20216.8	15511.3	26178.5	1000	23148.6	18922.8	1000	1000	1000	15563.2	1000	1000	1000	10325.6	1000	16147.4	1000	12856.6	18530.9	14720.2	15529	1000
106.04@19.39	1000	11183	1000	1000	1000	10986.4	1000	42704.2	1000	1000	1000	10401.5	1000	11619.5	1000	1000	1000	1000	13946.9	1000	1000	21934.4	1000	34713.5	10022.6	1000	1000	11557.9	1000	1000	38185.9	13746.5	20846.1	1000	11603.9	1000	10314.9	1000	1000	14630.6	1000	1000	1000	37097.2	1000	1000	1000	26878.4	1000
106.04@19.59	1000	21680.4	11804.6	1000	17904.1	20657.4	1000	18471.3	10640.9	21322.2	1000	1000	1000	11255.2	20709.4	39672.8	22602.2	1000	13314.1	1000	13439.1	1000	44353.5	13476.3	11469.5	1000	1000	12754	1000	19855.6	37838.1	1000	18609.9	1000	1000	14845.1	1000	1000	12372	1000	1000	11796.9	1000	10325.5	30778.4	1000	1000	15095.1	1000
106.04@19.75	1000	19977.7	1000	31680.9	1000	12283.5	1000	12443.4	11214	13131.8	1000	11706.5	1000	42314.9	1000	1000	26825.5	15713.6	1000	10700.6	11469	18291.7	38867.4	11173	1000	13394.4	11694.6	49189.4	1000	21861.7	18968.9	1000	22537	1000	1000	1000	1000	12856.9	13718.5	10636.4	1000	1000	1000	1000	1000	1000	13053	11344	1000
106.049@1.55	44134.8	49193	44129.6	41271.9	48522.6	52801.8	46064.4	52672.6	44127.8	39887.5	40701.9	41121.5	35718.3	41837.1	36657.5	30746	31258	29125	28674.6	27483	30612.9	15575.8	32005.6	33988.7	26937.2	23828.7	28678.3	25729	23386.9	27830.7	28667.9	11156.9	23395.5	63396	40698.1	51827.8	38745.8	48722.4	42414.8	40854.6	44368	53861.1	44737.8	50830.5	38810.4	38434.7	48405.1	43751	46614.4
106.05@1.22	3974698	4.02421e+06	3.95881e+06	3.63307e+06	3.67194e+06	3.61065e+06	3.47194e+06	3.36265e+06	3402980	3070821	3.06789e+06	3.05519e+06	2.87247e+06	2.83489e+06	2807772	2.4285e+06	2.46138e+06	2.37486e+06	1917541	1.87242e+06	1.91376e+06	1.53888e+06	1.5267e+06	1511488	1.49914e+06	1.46116e+06	1.54379e+06	1.61956e+06	1.62061e+06	1.65036e+06	1.65387e+06	1.66941e+06	1.66522e+06	3925350	3.85006e+06	3.93385e+06	3625723	3.62188e+06	3646902	3.48967e+06	3.43603e+06	3.47883e+06	3.22103e+06	3.09366e+06	3.17174e+06	2.85855e+06	2.89036e+06	2852349	2.56273e+06
106.078@16.08	121556	42884.2	100332	85267.8	25291.3	55482.4	19451.7	1000	27667.2	20483.4	1000	1000	16825.3	65785.8	53158.8	14096.2	34764.8	41798.4	1000	1000	1000	28631	23779.7	15048.6	78133.5	51937.7	113293	31111.3	17452.5	60172.2	23205.5	15404.6	28585.7	65536.8	97221.7	51371.3	44870.8	27129.4	41321.8	33888.2	26769.2	17151.5	19683.8	1000	17712.7	30571.1	1000	27107.9	39742.1
106.951@1.13	196771	209309	209685	208595	213435	209633	208151	219512	204945	206688	220608	206251	209591	206787	218458	212829	220708	208488	218111	231441	222901	220627	235994	229469	237420	246192	250825	253215	250163	247630	246803	249624	248937	220953	221241	224806	213415	227105	217943	210076	224629	218424	209389	227278	217759	225077	222305	224220	235154
106.992@5.23	898415	61583.6	25735.8	69868.6	23758.3	800327	31896.4	58765.9	20467.6	845234	22773.1	804239	53814.7	68365.4	27873.2	901009	30768.6	69531.3	35418.6	62394.6	64750.3	68086.2	27363.8	1000	836832	42384.5	62281.9	33857.5	56394.2	26273.6	744512	35972.9	703031	13383.9	19633.2	817896	20993.8	850224	65861.4	803342	53452.2	777922	774008	811906	63256.3	27774.2	831175	15700.8	70008.7
106.992@5.13	69695.7	69017.2	66989.8	74078	62301.6	70251.3	57529.6	49619.2	57358.8	17710.5	57646	64075.8	59640.7	845778	65939.4	68979.5	55080.2	59705.5	57242.8	67573	64246.1	826708	63356.7	33522.8	65638.7	59949.6	834366	53020.5	48724.4	41293.4	57469.2	50726.5	59473.3	50798.3	772784	66786.5	1000	71997.9	72047.1	52111.8	784998	59120.1	66257.4	69348.8	44472.9	60936	69487.6	55877.7	66762.3
106.992@4.79	68594.3	63225.9	64697.2	72267.1	63836.6	70742.9	65129.1	847002	758369	69092.3	772877	60570.3	847400	62472.8	66997.4	64986.8	69152.8	66397.8	773071	60559.6	65276	65231.1	21441	59179.4	61396.4	754704	66405.4	57262	53927.2	51194.7	49351.5	57057.9	51642.2	59691.8	65574.9	65007.9	62589.4	63753.4	68618.8	58633.8	67031.1	58099.8	57824.5	61127.3	62052.3	26512.2	64263	59977.6	54020.7
106.992@4.98	50188.7	70138.2	789437	888598	33872.5	69297.9	812438	66799.3	66146.5	64227.7	66019.4	66322.7	62457.7	68993.9	63993.3	74843	61956.9	820975	58950.8	59858.9	58135.2	72084.3	807798	745948	68918.6	62740.6	58934.9	56753.7	52221	659676	49114.9	52692.8	59183.8	802788	61724.3	67668.3	749940	63754.4	65233.2	16110.6	53819.2	60251.9	40364.3	68104.8	805127	65190.1	70285.1	59741.2	811824
107.049@5.28	317121	377492	338666	319706	351086	358289	326031	368987	340026	313914	339410	363250	297760	321876	312859	289406	295914	317380	250236	253807	273399	228978	290385	270562	288274	290209	299447	248233	291185	265304	247287	284077	300523	501823	454544	495444	467659	452653	490258	486914	504174	451444	461500	499652	659820	391836	477716	427221	450117
107.059@16.96	160489	307139	307778	239090	201078	219608	323039	105386	223796	309039	257789	293933	215909	233241	298465	144635	84885.3	200245	235364	274317	252023	238072	189802	275839	136439	206002	147610	451539	425551	438027	174740	186220	357660	307619	298412	313971	280299	327787	151327	176386	180388	297330	257115	86010.2	135679	283514	279250	237013	179916
107.06@16.32	327638	332340	299226	100197	403320	433913	188159	234449	152490	244546	265043	174253	79306.6	356201	321161	358305	355106	138008	123977	233386	177179	198903	292471	187251	89237	139183	165113	188684	555900	145230	304613	370570	476654	415121	218278	277598	442856	154990	263928	385441	422182	361384	124609	241765	169932	232781	229503	134403	248114
107.061@16.09	86790.1	259471	229421	178767	1.91966e+06	432195	207813	267571	157162	752020	187859	311036	270160	375915	142179	151224	802504	211849	170373	261011	142990	315840	1.47145e+06	262092	810025	81565.6	173266	1074609	376575	2.67606e+06	1.83311e+06	1.71535e+06	251833	778146	353889	935233	124132	340986	1.95292e+06	374300	398121	327319	348613	288030	142317	249143	233747	102844	109240
107.086@13.61	1000	11349.5	27207	11259	30401.9	14405.2	32392.1	15467.9	10577.8	1000	33725.7	38107.1	20360	31535.2	30841.2	23145.1	39664.2	34022.8	34703	50598.6	27764.7	31144.1	28158.9	42297.2	30848.9	14043.4	31841.5	35927.9	23407.7	12921.9	27153	14577.9	24625.9	35291.6	14849	28235.9	21583.1	30894	1000	1000	30223.2	31843.6	44922	29866	41903	33894	1000	37032.7	30064.6
108.023@0.33	717026	933863	982634	648522	832074	827168	626441	690617	391482	414635	452999	606863	839025	536501	699587	678100	804998	701300	597388	488997	488748	576238	445554	528877	592209	602371	726994	296786	314338	377716	349874	17956.4	406092	687949	943017	825520	715064	655760	688962	583320	617796	507679	548091	408238	465209	701672	527630	732595	837896
108.056@0.17	85164.5	90910.3	84787.9	82807.6	138766	169065	72968.5	99123.3	105337	83289.7	90332.4	71259.1	74505.5	99284.1	81808.4	82455	67698.3	80756.9	66739.4	95684.7	38131.8	39097.7	34629.7	36786.6	60515.7	37306.2	41165.7	125314	95424.3	57182	51563.1	43660.3	54675.8	90416.4	64246.2	74495.2	150712	92399.1	147250	82234.6	72158.4	102613	69018.3	80561.9	85917.4	81580.5	87893	82957.9	83802.2
108.06@15.92	14828.2	1000	1000	12009.7	12144.8	48797.1	50251.6	46944.2	25586.9	28320.4	37949.2	53767	59209.1	41036.1	44656.2	45884.6	79438.8	104729	79324.5	67667.7	58013.3	230419	42615.6	57227.8	81598.6	38696	54193.6	44032.4	30420.4	128299	57609.6	71079.4	45883.4	1000	12786.1	1000	44743.3	39267.5	55620.7	31323.3	27722.8	30892.6	25177.8	40314.7	17030.5	23159.6	27049.3	56228.8	37689.1
108.069@16.04	74420.5	72158.6	94978	76586.4	113831	143630	78468.9	121612	221529	85890	222811	127414	99153.6	158131	256829	268768	101164	277470	277230	143096	152010	330562	234611	239803	133735	241609	233946	89218.4	135200	158548	154974	113356	212506	97524.3	94461.8	103448	134456	141488	104592	97769.8	149529	118043	101755	100994	149371	151117	82798.6	81114.5	276987
108.072@0.37	36314.4	24760.3	21064	36934.8	55419.3	25462.6	29210.9	51252.3	31846	42540	40442.6	22767	47488.3	76104.8	71736.2	55991.9	41489.3	19253	50651.6	34844.5	31070.3	48557.5	49654.9	48610.1	63231.9	31924	68667.2	40707.4	35884.3	52187.3	53802.7	82594.9	73961.5	20028.9	28542.6	37214	53400	34104.3	41644.4	26422.6	28655.4	58782.1	26709.3	64932.7	87115.5	45734	51971	61630.8	27525.6
108.081@3.08	64124	63111.7	32771.5	228870	212332	220999	353740	279012	466788	361309	336219	452393	409808	383871	468067	417076	409391	456254	461268	502179	436010	514579	493976	557542	574562	517845	632212	592749	598820	635197	670831	644128	752303	51550.6	47739.4	22390.8	201551	220040	211164	267689	297184	332039	320526	335182	389500	454675	393909	425376	443852
108.521@0.37	27715	38923.2	64977.7	42869.2	33499.7	28323.9	26102.5	23611.7	15824.8	11540.8	39196.6	35480.5	33588.4	25497.1	38654.5	26288.5	28162.5	22450	31260.5	38797.5	30226.1	40826.1	33119.4	36947.4	27978.6	39160.4	35388.9	27319.1	10460	37117.9	24502.2	26289.6	20737.8	18133	44741.3	39282.1	24054.4	24141.8	39151.2	31294.6	19897.2	31486	37654.2	34503.2	24865.8	36905	37142.6	31562.8	40630.5
108.949@1.13	11391.5	1000	1000	10830.1	15149.6	14759.6	1000	11600.2	12432.2	13230.8	1000	12374.1	1000	14327.5	11243.2	10788.2	12507	12356.5	12349.9	10884.5	13397.2	12406.3	11584.9	14282.9	13823.1	15172.8	14231.6	1000	14210.6	13773.8	14937.8	14101.9	15156.6	10536.6	13971.5	11916.4	12113.8	12034.3	12705.2	1000	13434.1	1000	12334.9	12490.9	1000	13941.8	11938.6	11739.2	14583.2
109.023@13.27	114865	42035.2	134542	634872	566812	82957.3	59617.8	23138.5	67933.3	547422	557412	98044	675427	46643.1	71106.6	592761	82739.2	47171.6	669810	100993	75686.1	92283.1	35189.6	93278	83198.6	92570.5	96380.1	47551.1	87949	55903.1	87334.1	103523	44711.3	566124	573402	110649	45782.4	351868	24810.5	36314.5	106193	99283.4	91024	99186.3	55028.4	103398	56733.1	53987.4	528040
109.023@13.15	323681	574303	441826	72758.1	96019.7	591024	503904	515101	499449	68376.3	115187	611022	54850.6	566903	327712	73096.1	634500	507458	104407	572325	500056	476260	498502	567009	646600	503741	491046	522055	588566	542076	586882	107543	621106	38511.2	54718.3	501982	612748	117575	49104.6	528463	524830	609363	557624	100605	389822	542244	667697	717487	50499.4
109.023@0.33	1.40362e+06	1.57267e+06	1.04993e+06	699126	401129	1.25512e+06	1.18902e+06	1.20948e+06	70605.8	554955	27078.7	917424	1331812	726111	1.00287e+06	838423	909918	1.14083e+06	868666	568307	595421	721747	539103	694426	813448	979462	857931	343479	491091	548100	423990	630581	611488	1.20147e+06	1.70603e+06	1.27759e+06	1.10373e+06	887292	912359	909993	997442	763661	634421	622772	681911	861272	938333	1083114	1.04695e+06
109.029@1.27	119714	132350	125261	118425	119625	128897	115873	117509	121720	92251.2	92520	80457.5	75671.7	78908.4	78570.6	72782.4	52550.5	64569.6	40176.5	44139	46100.3	38838.9	35568.1	35017.1	37078.4	42926.5	29304.1	32174.5	32462.8	37797.5	41572.7	39880.8	39921.4	133552	129581	134069	120783	117318	122716	116929	124943	114248	98154	107513	106581	90874.6	107987	104592	88722.3
109.029@1.9	31824	19028.4	10886.5	29292.2	39026.3	16608.5	48029.9	41909.8	45486.8	47195	25099.8	78922.7	55418.5	79435.6	33011.4	44181.5	36895.1	47066.3	49377.4	78962.1	74229.8	47681.8	27705.5	39389.4	77176.2	50519.9	80320.8	49553	48569.5	45240.8	47582.3	36376.6	34531.3	44263.8	44624.1	45222.6	52276.7	56419.8	57625.2	61429.8	71960.6	61897.9	64716.2	123932	108716	128003	129921	124024	116813
109.029@1.5	39606.1	1000	12246.3	13978.9	1000	1000	1000	15467.3	15538.7	1000	11695.8	1000	1000	1000	1000	13511	1000	1000	1000	1000	1000	1000	1000	1000	1000	1000	1000	12187.6	11835.1	1000	1000	11486.7	19928.1	1000	1000	12824.6	1000	23671.7	10172	1000	1000	18661.8	1000	1000	14091.8	10480.3	17063.1	1000	15041.1
109.065@2.18	32050.9	39916.6	35420.4	67581.4	86486.1	19840.3	75094	79576.1	19747.6	69943.4	25795.2	75481.6	74580.5	37635.6	71677.9	61446.8	20404.6	10289.8	50648.5	68284.8	1000	30720.6	64044.4	21567.1	1000	20486	27745.4	36016.4	1000	1000	25787.5	54084.9	16284.4	34598.7	48227	105234	78367.6	27500.6	34295.8	77721	13373.8	86711.4	77090.5	14864.9	14092.5	36511.7	16774.8	41361.1	10120.4
109.076@15.22	1000	11323.9	23729.7	1000	24702.9	57687.4	73904.8	54949.2	42012.8	38366.3	106943	73707	54886.7	353121	41709.1	65302.4	76916.6	67247.6	32357	19703.8	94669.9	107506	39630.8	30203.4	184758	80298.3	362013	100870	156775	87141.3	290478	60408	87334.5	1000	23346.9	1000	15383.7	36700.9	48537.6	98499.8	52601.1	76133.9	115184	65485.3	126966	36683.7	68205.4	98228.6	68102.5
109.076@15.51	12063.4	18819.6	23443	105951	50199.4	55876.6	160928	33854.1	101817	162774	158728	136778	148191	83562.2	965246	49782.9	77256.6	474069	580500	491093	157747	150436	116591	75518	145895	809525	80429.7	276086	180547	205647	731781	71813.3	332212	60978.6	34522.8	30515.5	33719.8	79744.5	199681	110874	124098	73936.4	77575	58133.7	99133.9	36897.2	111233	160463	81749.1
109.076@15.97	80030.5	38963.8	28042.7	256273	64446.7	78965	88548.4	772405	46674.5	44976.7	92930.4	158733	122996	50752.5	180765	1.12954e+06	75073.2	169804	266357	160227	127515	185526	657112	171406	50496.2	80899.3	927865	38050.5	137790	814263	131993	88572	88563.7	100811	70516.4	66976.5	663773	680648	87589.7	792762	72874.6	35493.5	957178	67658.8	177909	196706	87808	84145	230226
109.076@15.66	56931.3	24620.8	52198.1	395675	30245.7	36781.9	85222.9	81318.9	143809	232947	189312	163739	78008.1	74562.4	206938	150258	105205	132200	102177	48913.2	86176	799518	147368	91832	226222	169193	160941	100139	197276	244109	145091	55072.1	67797.9	43296.3	21974.7	30802.6	55690	46445.7	105311	78878.8	41236.7	530652	122137	53474.9	136682	54703.2	210348	222703	230820
109.076@15.85	32998.8	48362.3	140185	59935.4	68291.9	54755.6	74052.9	159026	91379.9	195100	112932	161690	899800	83815.9	273977	197290	225964	82082	609269	104196	146233	223352	74049.5	101844	133831	471197	255308	217719	74817.3	176587	175513	147471	103207	18423.4	42363.2	123602	39752.4	55595.2	442135	123279	74739.3	75468.9	118610	1.03758e+06	804066	163015	116963	87804.3	187385
109.076@0.2	40785.1	39724.6	118691	301197	93092.6	206818	175382	219398	206886	236055	234814	223424	295638	307719	333188	249565	96511.3	121592	281772	258168	312045	290748	273087	228673	294966	185050	268689	273921	308751	292227	155298	162729	138146	31606.8	79891.3	110032	327561	146296	154366	204812	181670	201042	199296	214963	162150	243147	277350	235441	294147
109.102@10.73	160494	163582	169391	78211.7	69420	65097.3	68611.2	98282.7	84539.5	55207.1	53292.7	54522.2	48925.7	53592.5	51178.4	34885.9	33280.3	32189.7	42461.7	45945.1	53282.6	26797.2	28105.5	25210.5	33349.5	34320.6	34705.6	33448.7	30039.1	31463.2	32773.5	29079.3	29419.1	159239	164776	154619	67284.6	61995.4	62472.7	72217.2	66916.3	79204.7	54386.8	39329.3	55975.5	65678.9	57600.8	71800.7	34230.4
109.522@13.51	117829	93574.5	391023	47426.2	29313.1	23799.8	69084.8	442468	37916	18865.5	46559.9	544044	45002.9	494210	28570.2	351710	57652.9	66736	23161.7	32718.3	506224	47170.1	76621.9	22959.5	71327	61858.4	46842	37034.4	63226.4	40063.9	75891.8	63665.7	593377	10329.8	25747.6	24900.6	248740	267451	48301.1	73341.4	628375	19661	415179	66137.6	516123	583563	84440.6	31217.3	535134
109.522@13.68	26946.1	86016.8	32929	48142.3	333245	378993	40561.8	20803.3	464964	63591.8	17487.3	35160.9	605630	28447.7	639743	243257	579376	54070.4	561016	25277	29765.8	38509.6	536640	21781.6	463220	35661	638995	58769.5	606621	81807.7	640351	526882	41215.1	164473	35200	19001.3	33196.1	187081	20187.7	547604	41039.2	565059	39992.7	517969	16949.1	76207.7	526762	76762.4	31671.1
109.522@13.82	235269	88737.3	20989.4	28129.5	29480.6	23333.8	17305.1	68942.3	77491.9	48668.1	67872.4	63537.2	16222	76042.8	23710.9	17386.3	28434.1	49904.2	66495.5	535997	19611.9	70912.2	35124	63518.7	24854.1	55099.3	74882.9	80717	78307.9	554650	40968.3	50624.4	77307.2	100453	55200.1	254486	42265.6	66405	29386.4	58940.8	81938.3	45740.6	30849.8	43585.5	33156.4	36140.4	52567.7	62604.6	65973.4
109.522@0.32	1.01199e+06	1.08983e+06	1.18138e+06	554810	686862	795305	794134	805704	684414	598866	576984	422138	883788	714512	757928	791588	777799	893047	693071	649989	97172.3	671998	664524	637791	727680	772736	343052	305643	614982	597443	574813	672928	632572	887658	1.02448e+06	943588	648878	563956	613058	749846	752846	697637	669305	579414	610700	781155	606022	834352	818599
110.009@1.06	999738	829303	847816	828387	903096	907986	880414	923911	852604	847026	857475	840000	843860	811188	825806	789978	851048	788642	824412	810872	861158	874540	930599	852318	899432	878169	1.4606e+06	846362	894553	922703	843780	902652	1.00353e+06	1.54148e+06	1.57968e+06	1591280	1.62641e+06	1.72356e+06	1.60745e+06	1.605e+06	1.70629e+06	1.60748e+06	1.51592e+06	1.60437e+06	1.58733e+06	1.56567e+06	1.66526e+06	1.54901e+06	1.55071e+06
110.02@15.35	476920	1.2855e+06	661376	359388	243272	357772	276411	401675	665012	468583	211936	551109	749239	1.67633e+06	595257	339347	678005	562091	619203	561522	295000	470380	703021	665987	673401	210518	917692	563809	352513	590282	869831	775318	2.54301e+06	546547	378730	569497	475673	769568	294882	615706	379176	179618	591357	252363	523355	345105	631379	284715	1.58139e+06
110.02@15.47	500030	1.12066e+06	831216	140045	670957	260671	473932	390683	191094	528185	622053	537515	570487	848829	402162	262599	254862	93454.1	387242	1.56786e+06	198050	358516	668050	519614	198356	1.71123e+06	2.5715e+06	2.57871e+06	2.82545e+06	583620	2.67739e+06	751515	187708	523779	456890	4.27272e+06	582830	221587	554137	644277	230243	1.10428e+06	359012	1.70475e+06	266443	194421	385084	140336	356212
110.02@15.69	545337	525751	1.50108e+06	300894	235347	222080	473315	229924	350923	417588	316029	357223	427996	504620	3.4116e+06	374844	406214	437573	222695	411110	550041	344542	1091816	584837	445781	1.58563e+06	393603	544314	469098	400603	583186	574331	399308	862570	296463	944025	1.85002e+06	123335	5.47477e+06	166160	560781	560368	253081	407353	98981.3	282611	465579	215938	574289
110.02@15.93	853255	316395	821849	872835	594196	314449	677583	227991	524853	950436	105557	461239	168846	168938	455612	394280	434365	381874	149775	262828	199460	218772	622584	474551	215075	402820	237513	527699	383397	374964	216123	270711	361768	493952	6660821	2047358	547121	320972	371797	425972	270609	304937	778037	225026	529148	293822	142053	498080	503765
110.02@13.36	1.94959e+06	1.46251e+06	1.92316e+06	1593581	1.81476e+06	1.71362e+06	1794162	1.6619e+06	1.56354e+06	1.62357e+06	1.62779e+06	1.80254e+06	1.57447e+06	1545527	1.61688e+06	1.48532e+06	1.68398e+06	1397505	1.45698e+06	1.46772e+06	1.53549e+06	1.46091e+06	1.40579e+06	1.45202e+06	1.45566e+06	1.60738e+06	1.56031e+06	1.63009e+06	1.63835e+06	1.75271e+06	1.57616e+06	1.61936e+06	1.67187e+06	1.95421e+06	1.6987e+06	1970868	1.77282e+06	1.58641e+06	1.86852e+06	1.7052e+06	1.83945e+06	1736675	1603112	1.72217e+06	1.67574e+06	1.72825e+06	1.68487e+06	1.89082e+06	1.43757e+06
110.02@13.52	1.89561e+06	1.85032e+06	1.9666e+06	1.58379e+06	1.68825e+06	1705919	1.70289e+06	1.66034e+06	1.82746e+06	1535977	1.75534e+06	1628177	1527434	1.5055e+06	1.54775e+06	1.58963e+06	1.66651e+06	1.42896e+06	1386494	1547896	1.38518e+06	1366624	1.42377e+06	1.36999e+06	1.45628e+06	1.55552e+06	1.50452e+06	1624121	1.55654e+06	1.62429e+06	1.74693e+06	1590304	1.26821e+06	1.70507e+06	1.90347e+06	1.86656e+06	1606513	1.70758e+06	1.79667e+06	1.63804e+06	1.7001e+06	1.74354e+06	1563913	1.6015e+06	1.64241e+06	1686407	1.54406e+06	1778490	1.53636e+06
110.02@13.18	12896923	11667092	12809457	12593311	9640237	12218074	12610536	13199740	13069267	10268193	10124159	12641840	10199381	10791126	11700143	11700690	11651303	11587976	10854761	11237618	11377200	11177843	11048251	11202218	11028920	10280032	11541829	12361576	12630249	12065912	12769504	12776638	11084513	9767518	10860479	12216161	12279656	12369262	11858117	12728575	10939855	11568341	10534010	12509879	10779888	12817919	12496910	11188184	11550805
110.02@12.45	609879	560322	562023	486525	499591	498490	483063	519119	524856	468889	490987	447436	384571	464793	472731	416759	467649	399383	411035	419371	434149	383377	415492	424144	385998	378884	450419	496314	440599	470465	486189	484262	530849	410630	527078	527476	493090	501723	520679	461443	476260	466441	447740	468766	482138	480193	503145	522540	442622
110.02@0.34	17136822	21991054	21322220	11147950	16274195	16851904	16707895	16405462	10921581	8816289	439166	13087997	17207128	10785176	14036372	12778240	14278038	15200122	12314337	8728758	9442468	477244	9202145	334390	11416667	12874534	13000584	5.58816e+06	6287436	6855036	6255656	8423785	7875254	15913428	23115106	17502930	13902382	7277238	13048189	14180196	14991098	12026941	10104778	8540467	9174283	14110655	2.47283e+06	16445648	13801485
110.068@1.54	13798.4	19074.7	1000	10711.7	10915.5	13929	19513.8	16009.2	1000	1000	21027	11194.2	10347.9	1000	1000	14066.1	13608.4	1000	1000	25034.6	11934.8	22893.6	16019.6	16509.5	1000	17366	25742.1	14995.5	13531	25747.7	1000	18969.9	1000	86820.2	93053.2	108930	77286.4	73634	77513.8	91044.9	65340	89925.6	93935.5	81921.2	76808.9	87742.1	89991.5	78556.3	76329
110.071@15.34	1.03445e+06	297962	343456	288271	620887	452505	854624	994636	674155	669999	1.02001e+06	982085	857950	1.19733e+06	1.26578e+06	385649	435823	1.1297e+06	506146	635036	414457	1319319	233638	1383544	1.01209e+06	529647	905847	272802	722837	1.14133e+06	412594	1.17008e+06	2752714	213662	545074	296028	883042	459737	292128	863245	1.18325e+06	915918	1.13473e+06	1.14445e+06	828754	802071	510301	709159	270760
110.071@15.2	298938	316842	275496	265626	551580	665318	415195	208348	484094	787372	312006	296393	231663	525730	776584	441278	753494	494169	396610	191001	624627	405974	276072	893560	228651	321878	565792	475107	576074	312158	601450	577030	455876	513193	308021	494242	548421	377200	566712	731836	576669	588620	337062	701599	534330	569477	546446	650555	302364
110.071@15.57	963781	443235	152862	946511	356367	633645	1.0326e+06	1.14e+06	399537	1.45566e+06	1.06165e+06	1.04e+06	844478	955647	1.08174e+06	390195	503390	670900	632700	700464	1.08105e+06	1610645	1.42607e+06	1.86433e+06	10825266	6973855	839197	9724804	2.03327e+06	298636	1.35495e+06	1.49507e+06	1.34949e+06	1.0663e+06	626581	582461	619647	698574	397611	233824	525340	438003	755807	1.34129e+06	392264	1.0197e+06	1.22546e+06	462368	1.17672e+06
110.071@15.74	401416	154731	508868	1.03083e+06	954002	621180	1.11492e+06	1.4557e+06	1.39944e+06	818879	1.12979e+06	730041	311738	1.80509e+06	1252371	428446	905387	1.38514e+06	683298	8.20583e+06	1664926	1884608	772174	1416102	626800	1.37013e+06	844346	2.02575e+06	1.41001e+06	673402	1.04327e+06	564237	577170	1.04884e+06	506582	755314	478619	1.5796e+06	1.51707e+06	1.17716e+06	930193	5.38248e+06	1.38502e+06	470471	1.50276e+06	852258	604029	1.7564e+06	9118498
110.071@15.98	6.66747e+06	5.50759e+06	555023	391736	7251011	7541633	8011412	7812715	8.34357e+06	8.35503e+06	8.21416e+06	8.21849e+06	8487263	434272	9312760	1.18667e+06	8749357	7905551	1.73198e+06	298329	8906648	9606739	8515038	9860427	1.65786e+06	1.64192e+06	9816880	368021	9997669	10241505	9950058	8.09376e+06	649188	5.82839e+06	5990684	6425194	7.35439e+06	7842799	7.0392e+06	7.72711e+06	464647	1.40277e+06	8857017	8407413	8305322	8736910	9096659	8668286	1.5608e+06
110.071@15.86	812838	630356	188687	509033	757565	1110860	647465	1.17857e+06	560590	596328	1.41462e+06	1.49391e+06	311738	8934732	896504	8811474	1.64755e+06	800383	7.66975e+06	793379	862430	834743	1.49764e+06	769082	2.04432e+06	718439	1.96931e+06	1.83774e+06	775625	1.3581e+06	591206	1.41606e+06	1.35131e+06	590471	892264	384627	303330	588969	985472	754204	1.15114e+06	1.27945e+06	1.0497e+06	1139443	1.62183e+06	1.15487e+06	941048	900063	321158
110.072@1.19	2.66686e+06	2.80902e+06	2780412	2746518	2.77514e+06	2.7718e+06	2.63871e+06	2.70678e+06	2679483	2521510	2.56374e+06	2.50114e+06	2.35143e+06	2.37095e+06	2.35835e+06	2.11222e+06	2145711	2.11646e+06	1933767	1.94865e+06	1959204	1.82439e+06	1.82898e+06	1.83106e+06	1.763e+06	1.77944e+06	1.81776e+06	1816511	1864629	1855726	1.81042e+06	1.85074e+06	1.88668e+06	2.37779e+06	2413891	2.4053e+06	2.31707e+06	2.41614e+06	2336511	2.30614e+06	2.30208e+06	2.2938e+06	2180515	2.25446e+06	2.23401e+06	2.12982e+06	2.15538e+06	2.13895e+06	2.04967e+06
110.072@0.2	2262754	512070	2359647	4949617	5.44998e+06	5556139	2.89894e+06	2.53973e+06	2.62514e+06	2737803	2.77292e+06	2779106	2529587	2.84839e+06	2.80351e+06	2.35177e+06	2266050	1.57768e+06	1471751	2475153	2.96431e+06	3.04853e+06	1740188	2.57571e+06	3.06849e+06	3.02934e+06	2.61965e+06	2.6593e+06	3.01945e+06	3.26558e+06	1.52465e+06	2664672	1638266	1.23937e+06	1.7289e+06	1.89889e+06	5394139	4.99607e+06	5800498	2.68061e+06	2.32235e+06	2457717	2.31792e+06	2764533	2.70536e+06	2.51801e+06	3189843	2687787	2723199
110.522@13.29	61603.3	686175	91737.3	143971	923199	110678	829666	69611.5	97470.5	862844	93256.9	109019	27645.7	30517.2	774802	120218	119276	92434.3	117811	117687	109732	29990.6	110241	101515	73403.9	57507.1	93626.4	704143	966527	46954.2	131490	144109	76883.3	64574.5	58497.1	148027	23947.7	56869.4	68288.4	787684	68307.9	692682	107012	103911	59080.6	103911	121376	132509	68449.7
110.976@1.75	1000	1000	1000	1000	1000	1000	1000	1000	1000	16898.9	17538	11943	17969	17893.3	15508.7	22387.7	20655.8	19117.3	23566.7	25377.4	20046.6	24392.6	20783.2	23034.9	24663.7	27280.1	21209.7	21369.2	19301.5	20883.7	17700.3	20763.1	19661.2	1000	1000	1000	1000	1000	1000	1000	1000	1000	10586.2	1000	11628.3	14351.6	11329	1000	16648.4
111.02@15.35	1698048	1.03167e+06	1.19074e+06	520004	888343	1.17208e+06	305923	291803	1.02255e+06	675494	805326	959003	1.14736e+06	3.02238e+06	964141	496109	907860	1.0076e+06	391613	513613	578389	357148	824005	897924	1052054	838168	608940	778843	825205	1.24974e+06	623283	4706405	3.49551e+06	904824	1.0402e+06	1.33765e+06	1.03622e+06	1.21131e+06	874224	989968	587517	838267	1.12263e+06	507060	614178	1066678	724025	690898	935029
111.02@13.68	2.04555e+06	2.04055e+06	2.10403e+06	1.93762e+06	1.80407e+06	16307812	1.61862e+06	1.64019e+06	1.69397e+06	1777471	1.5605e+06	1772314	1.56305e+06	1.64007e+06	1.74982e+06	1817643	1.61491e+06	1.70208e+06	1.54608e+06	1.53844e+06	1.66595e+06	1.5394e+06	1.68822e+06	1651187	1.71148e+06	1588966	1.70283e+06	1.63681e+06	1.87751e+06	1.88408e+06	14566482	1.7811e+06	1.64888e+06	2.07629e+06	2.01618e+06	1.94857e+06	1.82623e+06	1.8624e+06	15478346	1.69865e+06	1.78694e+06	1.89803e+06	1.72216e+06	15612158	1.59174e+06	1.67954e+06	1.80377e+06	1726466	15225978
111.02@13.79	20696520	2.15496e+06	2.10164e+06	16043013	16335966	1.86336e+06	16308875	16245892	16456476	15393337	15095275	15712075	15311960	15764644	14377157	15857614	15654032	1.64108e+06	13873380	14920377	1.83195e+06	14353793	14411202	1.70692e+06	1.75521e+06	14729786	15019522	16097709	16190129	16380654	1.93839e+06	16039717	15411250	1.87521e+06	2.07633e+06	1.86135e+06	16514015	15967216	1.85529e+06	16052543	14993936	16105535	1.61279e+06	1.75711e+06	14568109	15640177	15557856	1.66376e+06	1.77522e+06
111.02@13.91	2.52064e+06	2.28112e+06	2.09452e+06	1664210	1.7531e+06	1880561	1.71492e+06	1.714e+06	1.67565e+06	1612391	1.7397e+06	1.66972e+06	1.74116e+06	1.77436e+06	1.58108e+06	1.81626e+06	1.58989e+06	14347584	1.71605e+06	1.56664e+06	14925612	1.71411e+06	1.71579e+06	14631855	14634419	1.69818e+06	1.56975e+06	1.83155e+06	1.79948e+06	1.78511e+06	1.79747e+06	1.92846e+06	1.77586e+06	17963818	1825314	1.96179e+06	1.87877e+06	1.73116e+06	1.73074e+06	1.66502e+06	1.77609e+06	1.67582e+06	15452455	1.5862e+06	1.6254e+06	1690843	1.60622e+06	15373317	1.58749e+06
111.02@14.28	2.27493e+06	2.16737e+06	2190494	1589021	1516927	1.53981e+06	1.47059e+06	1.55285e+06	1.51328e+06	1.47031e+06	1.49215e+06	1.45401e+06	1.52125e+06	1.18033e+06	1.55208e+06	1.39165e+06	1.59544e+06	1481108	1.41084e+06	1.42205e+06	1385896	1.31999e+06	1383525	1.33122e+06	986161	1.49136e+06	1.40762e+06	1.4546e+06	1.32568e+06	1.40794e+06	1.47389e+06	1.40903e+06	1.4357e+06	1.92063e+06	1.83214e+06	1.94142e+06	1.57419e+06	1.59036e+06	1.62089e+06	1.47737e+06	1.56884e+06	1.50808e+06	1.52926e+06	1.41645e+06	1.44958e+06	1.58923e+06	1.44538e+06	1.55999e+06	1.45028e+06
111.021@0.29	20805454	21328852	932599	10953112	3.86608e+06	691330	15474195	15121508	14317990	13271854	12761665	14599163	16737830	15022200	15840205	15589846	15787001	16625976	13497234	12577389	13472087	13726184	14422870	13854403	14312552	15727642	15154488	11762920	12516086	11280888	12692756	14023220	13600182	19642280	20493034	19260630	11977221	5.42312e+06	6517092	14793755	15377452	13802457	13042114	12751847	13898503	15112011	14452273	15805579	15952050
111.081@0.62	50974.2	44253.5	23536.8	27382.7	20167.3	28942	31167.1	25917	17280.2	22826	25806.5	18372.8	32023.3	23444.5	25837.7	23538.3	23973.4	26632.6	24933.2	22078	22488.3	15036.7	22405.3	25631.6	1000	23191.6	21785.1	24732.9	26407.1	24006.9	26817	22886.7	19290.7	41455.6	21287.6	26500.1	19099.6	30166.1	23506.8	16570.4	31934.4	32175.8	15237.4	26652.7	13575.7	25825.9	23154	20419	28053.8
111.091@15.97	117856	188788	105578	436373	275863	543447	438036	376636	557554	834036	5493260	204295	718238	273405	682469	2.70449e+06	3.82559e+06	1.27645e+06	1.45547e+06	660700	7.37328e+06	7304292	328766	859458	978211	394247	835794	221723	8025469	448510	466322	259084	253101	254878	87721.8	149907	157408	485009	3.74318e+06	139684	2.59806e+06	202555	331454	340126	790293	740666	737647	483482	972727
111.092@15.35	282860	646265	606825	104245	154298	366504	238220	221386	197520	399732	778805	439509	450325	2.20841e+06	1136444	382044	2.89227e+06	713020	612437	2272169	977773	784152	1515541	7.36782e+06	433350	445923	1.96073e+06	177371	584489	2221965	427037	386741	1.41768e+06	668377	1.30507e+06	261753	206747	181722	438999	366023	1.83158e+06	319715	452043	563290	2.26081e+06	139526	394522	238805	894864
111.092@15.23	114987	43419.4	195778	131764	275087	205728	302476	453877	360201	455879	463538	409885	486147	355126	245050	477893	536427	1.01564e+06	438091	128233	477379	835850	242031	587378	7.68075e+06	541472	668821	331367	589096	511380	2.82023e+06	300072	252461	176458	75352.1	228409	308173	75985.6	346332	512064	214868	235791	485009	246399	438011	137234	536489	456003	2.05023e+06
111.092@15.86	1.11097e+06	136010	137636	198188	379913	264467	607242	371155	407083	693199	605630	256588	1.14034e+06	810184	7307264	1.42164e+06	1.28613e+06	550540	2348196	396379	847052	1.21214e+06	328766	1.09335e+06	858063	2687585	1.64846e+06	613013	827176	894880	466322	259084	501586	106077	216748	894456	319347	419019	781202	4.44662e+06	623024	610830	952440	5.92606e+06	785233	665054	613545	1.10473e+06	782197
111.092@15.56	347569	97438.6	711575	319151	531577	1.69292e+06	724524	444044	863177	527442	377179	245872	3701662	349042	1.05332e+06	4.0998e+06	362264	1.24621e+06	4.14943e+06	1.30146e+06	441989	923334	438417	1.28974e+06	933783	4.60709e+06	317748	688661	1.26882e+06	1.19238e+06	1.7846e+06	1.09757e+06	1.74989e+06	515983	265119	1.33662e+06	232341	3.4317e+06	408429	594837	586711	213440	181102	625655	682092	177600	453368	932273	932363
111.092@0.19	382014	506900	422655	1159476	1.38126e+06	1.26103e+06	924529	888759	312562	772665	1.19188e+06	843809	1.29308e+06	2.0677e+06	2174995	1.46566e+06	1.2718e+06	1.65294e+06	2154111	1.82131e+06	1.55703e+06	388624	1.29846e+06	1.43384e+06	1.70618e+06	2.11084e+06	1.92731e+06	507656	1.86438e+06	488919	493899	616235	1.10059e+06	228402	292329	387464	1.42993e+06	1.22357e+06	901235	647419	515366	676842	1.04143e+06	1.63916e+06	667595	1.48743e+06	952087	1.53226e+06	558331
111.092@15.71	143196	97438.6	330065	3.11182e+06	327010	156120	226964	747134	509087	727756	736999	937766	291553	349042	669520	781510	388644	2.3296e+06	1.45972e+06	2.95543e+06	1.32565e+06	803278	3642441	1.36127e+06	1.17926e+06	656803	1.33467e+06	7.35533e+06	799260	2971124	462137	4.0704e+06	319456	124773	193488	253598	212203	736977	816566	727752	601051	213440	347226	443816	695008	197000	764922	1.17477e+06	601351
111.092@15.03	263184	49459.2	99551.9	70739.7	50055.8	226678	58110.6	156106	50899.2	195732	234110	312928	1.06159e+06	240945	309737	116781	271698	328206	165325	179438	163172	472961	122310	181303	146404	320026	159283	322222	468604	107621	347119	237507	492475	92148.1	59359.1	101433	178832	186147	169015	107279	278460	86826.2	278448	229075	195749	121092	201088	174732	162773
111.521@13.6	68124	73802.4	83773.1	120122	153109	32808.7	1.24511e+06	120292	106142	1.21648e+06	139696	23972.3	96596.9	148613	111642	73170.8	70140.4	115621	143866	126199	125764	81723	144625	47402.1	132898	130992	128381	1.32713e+06	138628	152468	152630	1.38182e+06	29145	132140	19280.9	96499.7	142477	47566.1	94981.5	66911.2	65462.5	74093.4	99264.3	134167	81945.3	79477.2	96678.2	134488	125128
111.522@13.73	121568	49917.9	27700.7	107458	1188880	39476.2	145056	1.21639e+06	45557.1	43360.1	129717	129646	119106	156257	1.13585e+06	143197	1.18601e+06	162196	145236	143274	133056	148046	1.07929e+06	130704	142770	145601	145815	132301	167070	159596	147519	149899	1.33058e+06	1.47003e+06	149398	170303	23460.8	42766.2	107010	150956	148207	65515.3	1.23155e+06	146394	58723.7	146691	1.26066e+06	1.07408e+06	64906.3
111.522@13.88	54357.3	178880	71394.8	144315	25906.2	1.30859e+06	107677	153706	131013	131558	1.18731e+06	1.23422e+06	128675	151137	119383	64104.1	99495.3	142557	135714	118136	136095	46188.4	132181	90740.6	1.2171e+06	136679	82696	146545	1.34804e+06	149219	40486.7	153458	145234	144328	162716	154794	41683.7	1.3949e+06	1344275	145122	124554	1.2113e+06	60851.1	1.15343e+06	84215.6	45706.3	143684	145442	72816.4
111.982@0.35	139700	165272	90493.5	115254	168349	77523.6	157718	144451	84686.1	69056.5	71412.1	107688	158561	39323.7	68115.8	92439.3	115590	141712	101271	76717.1	89351.7	63142.4	51430.7	93292.5	105907	114846	105920	63484.1	45645	44937.4	33959.6	71626.1	50739.8	107987	143085	142817	145924	169983	140344	97730.1	129020	97478.1	71110.4	18876.4	70705.6	117761	21459.7	136261	49452
112.007@1.06	133611	148675	143664	146724	147990	144195	144504	149827	137932	141980	132960	138518	134253	133743	138974	128476	132552	130083	128934	135221	139966	135194	153988	137651	144304	138958	223695	135302	144551	143895	144993	143033	161647	244385	256959	249315	247330	259112	240819	168198	269277	236402	161228	180735	243640	238664	246971	236538	236959
112.018@13.72	857196	867872	793121	705728	652458	752876	725913	717427	761390	6094645	659039	724231	686960	709153	614931	726154	665673	5.51028e+06	5.68876e+06	672502	5.74015e+06	686581	629686	595392	644616	628348	648055	715419	692017	674130	732476	237006	614254	793789	781320	796629	696037	715483	5740556	723691	494624	635063	5764778	393036	441888	633529	6.04443e+06	232879	688270
112.051@1.54	27664.6	31805	36341.2	471468	518830	552727	1.58052e+06	1.61518e+06	1.72807e+06	3.00216e+06	3202801	3.28955e+06	3.72975e+06	3.93846e+06	3.93631e+06	3.78749e+06	4004932	3.93206e+06	3.48177e+06	3.58516e+06	3.73292e+06	3.23524e+06	3379424	3.39208e+06	3480821	3590953	3.66894e+06	3.59133e+06	3727555	3722658	3.41155e+06	3.75317e+06	3.79211e+06	1.00057e+06	1.02991e+06	966697	693240	710367	650240	411690	430009	342292	394876	416148	609985	1.16157e+06	1173810	1.56029e+06	1.61523e+06
112.059@0.19	260115	125419	166097	157244	67427.5	133786	97362.3	167363	155106	179211	144424	161563	91222.2	170439	83250.2	121987	79155	73811.2	62227.7	83455.4	111296	111119	154257	140886	235558	166948	85954.6	120398	104611	398632	240442	167769	170594	107785	80732.7	197790	36975	83242.2	95587.5	63069.2	93455	47123.5	145962	93978.8	199927	118632	99048.2	173819	122250
112.063@16.07	1184593	632756	836929	878927	674034	726821	575025	876924	582805	782888	273647	621103	649774	687348	668378	688749	871646	662161	175812	227700	541683	733715	1.17228e+06	407924	836840	777822	724750	1007535	347152	703232	944783	1.03947e+06	835186	870720	560036	830843	1.11315e+06	737414	910845	679571	479919	930219	679451	750865	799940	766852	991192	470583	617077
112.063@16.29	228008	86848	309247	217799	309999	244984	127418	234839	119880	193865	171803	137735	95671.6	251066	276689	213495	35457.9	138461	96275.7	98277.6	209623	239630	222415	187778	271170	252292	173012	105936	101370	122962	77610.9	162220	298408	102024	110064	200585	258136	278202	292528	140261	234892	287106	116994	231974	177830	187581	201950	53666.6	106466
112.063@16.96	92127.6	67640	76874	166984	210714	180559	250406	77277.4	118407	175760	38012.6	222665	114407	70106.6	163998	172744	161971	215742	196094	189371	215286	48160.4	230806	165714	244453	92677.3	114125	87293.9	121147	83664.3	219515	163426	133058	97175.4	95065	138556	63245.6	195560	136078	110788	239203	238156	187862	216197	192364	211895	97910.4	78527.2	203847
112.078@1.09	27765.3	28330	25794.4	24587.6	36850.8	21818.7	25676.6	22053.2	27407.8	23916.6	29001.3	28889.5	26103.8	26226	21638.3	17610.7	24363.8	25374.7	21408.1	1000	18020.3	1000	17249.2	15527.4	22531.7	1000	20128.6	23465.9	20568.3	20324.9	23861	22891.7	19621.9	35698.2	31381	33837.3	32280.7	24841.9	23577.7	25271.3	25023.5	18580.8	24482.3	17207.4	30670.1	25265.6	10403.7	26295.1	20541
112.084@1.47	1000	11831.8	27316	24027.3	39383.2	32420.7	28717.6	26755	26551.9	31879.1	48765.8	44415.7	30128.5	34574.2	31536.8	33193.8	22318.4	31797.5	25458.1	40551.2	45979.3	13036.9	19440.8	23819.1	25876	24800.1	22873.9	26874.9	14797	24161	25671.3	17068.5	23831.3	138626	141963	136102	160290	178603	165003	159309	179275	171856	173221	180627	167747	170075	178575	164406	160048
112.087@15.29	69124.1	39413.9	171775	110230	249301	215088	267827	329568	1.15312e+06	315920	437642	294280	115506	663745	245255	284014	260488	194019	266045	89138.1	368496	421222	1.22146e+06	355596	492553	193863	661872	142996	474857	281186	185508	220673	515034	48858.7	211313	93772.7	209086	184322	284787	550057	331407	444232	589108	105419	376071	331616	143918	211224	226182
112.087@15.5	161790	100075	99434.4	156586	203698	245510	582653	571888	759162	437428	509590	811544	446190	323159	4332821	335564	331573	414720	402579	2.15842e+06	419375	619648	288729	590010	414486	406758	377042	5765806	361683	691050	821065	360071	1.36939e+06	288217	797352	94135.5	215967	1.34165e+06	334043	527565	516174	168133	291642	216249	571139	157333	479358	699174	453751
112.087@15.12	61494.7	56223.1	171012	128247	82076.5	159452	109935	173391	54982.3	277458	248108	274204	104298	282786	338919	130875	241019	171378	81058.8	272978	86826	362158	216928	235334	320653	184189	306158	171012	376227	219954	131983	154766	368194	103443	42699.2	137003	68044.9	114424	95029.6	189660	147790	129003	267890	139717	94987.1	94528.4	180010	351752	327581
112.087@15.69	146518	103896	155052	414562	233552	138633	325302	623615	503753	770629	796164	615751	515364	242111	429214	130552	549812	370145	404200	179722	240558	5.14975e+06	701837	351440	644112	718802	642579	1.2746e+06	545758	873450	386232	309246	218684	142929	241438	200987	457500	609553	451832	305179	586350	255467	253682	343336	404544	350970	836673	891988	908050
112.087@15.82	1.33822e+06	62293.9	140552	161407	308777	274768	672626	408968	365885	687266	341185	615393	391558	392377	804505	811290	834457	406101	1249848	438126	502643	1.06627e+06	528566	210251	770235	1.02329e+06	198980	370572	723846	314542	676203	1257747	355692	218071	124795	213456	119243	432328	446620	353302	382519	714142	589321	878330	450624	717404	880710	648935	815384
112.087@14.96	43636.4	34446.7	93563.7	57673	83010.8	100028	91973	150664	62222.5	63980	90223.1	90974.1	136885	142500	137748	142864	163988	162090	154241	54615.7	103329	190068	79644.3	142156	50046.4	89129.6	187478	102184	210612	198686	123227	57417.9	136260	41803.3	35571.9	39804.3	61595.3	94652.1	46179.2	103234	128911	83122.3	131320	92325.8	116736	142225	53322.5	109543	58449.3
112.087@15.97	292197	96380	85292.6	111842	197626	293955	351416	306507	757359	785896	378457	649981	905535	185234	694147	606587	340803	687484	598142	550288	365285	980417	298073	659632	994198	834209	851585	449745	674391	1.03596e+06	522675	211517	500956	110121	76002.9	211661	275616	368986	380663	107104	168497	140193	244151	236556	722200	357661	99904.2	373597	971933
112.087@0.22	533523	714225	631406	991150	443012	1.33822e+06	715984	721171	670348	595835	725462	590688	603103	445343	471040	374161	335307	921551	268131	151015	367693	369659	855045	159747	511535	326150	925813	410060	437560	465190	455850	631014	660177	524811	388791	523449	351820	413251	296503	1.03392e+06	804003	893921	420771	320656	778506	481289	313605	478433	354462
112.112@1.07	1000	1000	1000	1000	1000	1000	1000	1000	1000	1000	1000	1000	10099.6	10629	1000	10043.7	11640.9	1000	14167.8	16607.2	16290.5	47001.7	45368	47751.4	119098	115664	147317	192013	212485	199694	226348	240955	399985	49905.4	62950.2	52136.7	64065.8	78669.2	63800.3	64786.9	72167.9	67656.4	67389.4	69891.5	64484.6	65337.4	74234.5	64753.5	72069.7
112.112@1.55	318166	366991	344411	299482	485362	363355	278897	464502	459879	499233	286102	661672	490150	564940	539328	349741	469768	608770	344872	363484	358209	346821	318567	299515	280796	231717	252406	185014	206202	249520	175626	182983	216693	440080	370844	457015	257234	344501	306009	288699	279273	374763	295939	286574	281683	278816	161638	227127	182804
112.112@1.24	12053.7	1000	25465.8	38124.6	48464.3	36376.3	33546.9	35419	36144.8	49744.6	35556.1	39533.6	60407.9	63025.2	67755.6	48305	44249	55591	107047	127440	121579	190733	185656	195915	170574	170054	164992	151145	142613	150207	153888	144635	146779	23867.3	26143.8	38124.7	38375.8	33164.7	24397.1	28370	41004.2	31913.8	15344.6	47644.6	25340.9	39151.4	45052.2	48605.7	50182.9
112.52@13.62	1000	23314.5	1000	19466.3	50321.8	11101.7	17774.1	31810.1	17357.2	16960.3	13023.4	44369.5	28517.1	34353.9	31070.7	30026.1	27197.7	28847	21642.4	24270.6	24772.2	411402	40971.8	37129.4	43556.1	18868.4	27846.8	28931.4	395160	11210.3	428104	40725.6	337802	28342.3	1000	18522.4	24406.3	14060.5	116642	1000	27020.5	16452.8	374367	1000	20980.7	23187.7	21145.9	14737.7	44207.8
112.52@13.85	30903.7	20540.7	22377.5	12253.3	11607.9	22446	36614.2	19794.3	18590.7	94086.9	11297.6	19350.3	322537	11134.5	19075.5	18385.5	411144	24296.4	11102.4	36111.6	346811	20795.4	45115.5	50275.4	42399.9	25713.6	19750.7	18198	34249.3	54839.3	29927.6	15489.1	34123.2	38491.7	16188.6	33514.5	37764.8	27303.2	24171.6	103483	35896.5	16663.7	22044.9	18707.8	33220	373953	12198.1	48731.8	409894
112.967@0.33	140275	153512	123685	83100.9	78993.1	106349	124647	119132	104582	84235.2	76718	92768.2	135567	96181.7	102120	89783.6	119198	130371	98354.1	20488.2	104722	83200.2	88138.4	92141.6	96693	18426	107213	15073.3	22627.9	59992.6	58890.8	69373.4	66414.5	127008	143176	129950	44509.1	106439	84852.4	103260	114961	24943.9	88678	21674.3	19520.2	27447.7	103573	22049.2	107939
113.017@13.67	66887.9	41467.6	26446.5	793191	42138.4	72253	37823.9	84746.6	32964.8	31644.6	86887.7	57028.9	88793.1	39063.2	35867.8	762413	90916.5	91020.9	47019.8	63621.9	62240.5	79467.7	27081.6	627980	51157.1	94812.1	85212.5	86078.1	62423.8	38688.3	803953	84684.6	91692.2	28739.4	22018.2	21369.2	91401.2	752663	63496.2	35867.1	23134.4	80263.1	66168.2	77421.6	710699	80679.7	79456.5	37041.4	95941.6
113.017@13.8	857499	952096	88779.8	42329.8	41289.6	89971.1	78615.3	107445	89805.5	37207.7	66926.3	38289.3	101449	45908.3	100302	43279.3	50249.1	49579.8	68180.5	75857.4	40636.6	84051.9	89351.9	79441.7	85848.9	98216.1	78792.8	754936	36401.7	87512.9	89130.4	42680.2	82925	53111	107819	47608.7	44028.2	64404.5	19533.4	63553	93086.3	36746.2	24906.4	726150	69915.6	88403	53586.3	755980	633094
113.017@0.3	1.10856e+06	1.14339e+06	981386	614388	679679	666280	880084	811561	795589	784166	750984	391289	916781	843710	897510	852775	921110	878764	737512	737004	711133	783017	797188	783431	805907	853119	635003	688220	689694	644378	732905	771006	801580	1070770	1151905	1.04934e+06	661897	596359	438228	851353	878786	786918	766220	732154	749313	877655	35711.6	887836	922916
113.017@13.94	84006.1	57974.3	104149	89552.2	71213	41071.3	765045	99364.9	606220	45725.1	29180.1	775011	74306	865713	41967	65317.9	42577.3	681950	47023.4	59246.2	681426	50723	41356.7	81903.7	64591.3	59361.5	55291.2	74004.7	49316	90262.3	98550.8	75925.5	96580.1	56275.7	57753.7	52042	63616.3	48077.8	21291.3	651582	31393.5	58738.4	72588	73784.8	45862.4	93180.8	68786.7	66090.8	34109.6
113.031@3.45	41510.3	37564.4	47426.3	42538.8	42957.4	38611.4	34336.2	37916.5	39460.6	18068.5	35297.6	30367.4	32760.1	28578.4	10319.3	27713.7	26856.3	17898.4	29200.2	30101.3	28295.3	1000	24060.6	34148	32204	32236.6	36670.4	20303.3	39392.9	47402	17939.4	1000	1000	44146.3	45155.6	48797.7	39017	43272.5	44783.6	40155.2	39057.3	40394.1	34768.2	32789.9	36640.4	32943.8	24252.4	35185.9	30217.4
113.033@2.54	47459.9	39361.5	33589.1	37430.8	37953.4	38596.3	15913.1	31746.1	33055.8	21343.8	33000.2	16149.6	33317.1	11158.9	29443.3	26652	26949.2	29939.6	25357.1	26838.3	26469.5	16918.1	24099.7	19237.2	80551.4	137723	142898	217741	224192	251410	298721	312765	267690	644590	629583	581788	486598	499510	454868	302940	328436	225815	31686	35195.3	34164.4	33764.6	35339	33700.5	31312.3
113.047@0.16	283989	308162	377243	278691	235316	288116	286841	152809	98922.5	191185	223665	201703	222281	142767	137606	149514	142146	66185.2	68804.2	106944	78921.7	163179	70068.9	94272.4	128371	90602.2	109441	183006	182276	207773	110775	111096	195488	189748	190163	313131	270660	229889	270330	92052.2	129650	274682	154882	216674	115054	160981	116661	146114	161643
113.071@15.35	221776	620909	204224	104065	373565	218272	289138	239388	603405	411062	134978	559610	489829	228469	173106	202151	283761	419974	357250	253321	254801	1.34568e+06	773509	421040	196458	158425	2.03666e+06	402935	1.81981e+06	365489	1138993	318861	156485	1.19111e+06	560112	340400	582078	979738	161761	746232	588464	364395	172975	207022	676971	509081	200526	553181	288383
113.071@15.52	141215	627913	192039	104065	2.60826e+06	185660	803838	283286	559137	171736	192634	1864577	627680	506831	407131	257292	599281	455552	395534	354694	453951	276155	307214	346802	228547	626654	319012	296566	564000	258383	357818	548090	156485	903747	170368	377671	597230	347808	534840	763956	519945	676555	309805	348265	534626	698678	617720	591133	381339
113.071@15.1	1.1538e+06	154734	644912	91741.4	163518	208176	98770.2	157662	294472	170946	121966	332510	130900	197971	332490	127616	132355	277740	339436	333261	135605	179610	201785	212212	590516	296359	195832	230597	156473	114834	62669.1	118524	119011	203816	101185	542385	202235	340708	337698	135785	278316	135157	178575	281500	292896	165379	378278	214575	199730
113.071@16.01	3.77854e+06	95904.7	764398	4489692	1.80475e+06	4860633	687388	5244634	5.3248e+06	5.11767e+06	5.17485e+06	2.94899e+06	5.21215e+06	5356585	5238966	5.10661e+06	5.09384e+06	553298	5.21183e+06	5.09779e+06	5.02469e+06	3.66531e+06	5157045	5.10068e+06	4295263	4.48566e+06	2.95299e+06	4.24751e+06	1.93246e+06	5036612	3527038	1.33069e+06	1.24855e+06	2.12271e+06	4.61725e+06	3.78394e+06	4.85372e+06	3.60888e+06	4.52402e+06	4944537	406906	5091123	5.16778e+06	5.2521e+06	2.9586e+06	5.36211e+06	5315558	493026	456925
113.071@15.84	845325	2411032	3.94178e+06	397899	594646	230774	4101504	475927	1.05241e+06	809507	400866	406805	229752	336285	365112	721386	402044	536547	560872	596762	473642	552018	827462	906923	1.0052e+06	653407	648309	584565	262568	830128	573112	293491	190430	546846	581443	128271	100462	552074	298290	349826	4.94875e+06	836115	424153	569129	529194	688224	987938	5391511	4651900
113.071@15.69	802920	276984	470260	315323	506518	350283	266139	782711	398322	1.01601e+06	486374	330355	312775	784856	334919	685749	412829	5.35231e+06	343778	961381	398508	890194	344473	640494	722975	766635	161867	221889	164764	252552	548245	3.50814e+06	3529540	447275	437932	257394	813821	219097	368626	356077	505954	628876	800925	399891	707452	564760	149805	542488	252189
113.071@14.78	119940	45028	55952	196335	64693.9	253003	83975.6	156497	193737	55179.1	132461	76846.8	97351.7	204037	88332.4	83436.1	42277.8	59856.1	76973.6	111415	98353.8	63139.5	96252.7	110339	265237	73283.2	57768.8	64070	100829	53200.2	86276.3	137934	78347	53472.2	56102.4	73632.3	64571.5	108189	69406.4	325680	291977	112960	105501	169975	75210	91955.8	48735.6	118246	55282.2
113.071@14.52	29496.5	10236.1	19424.3	83287.2	20453	40373.6	50968.2	41111.2	24233.4	22677.4	86013.1	126877	20759.7	24124.8	44634.4	78628.9	55033.1	67358.3	72206.2	28089.8	65897.7	39598.5	79604.6	38467	52766.2	23904.5	61433.1	14749	110850	27868.7	68437.2	26782.4	51886.9	25544	37323.8	31238.3	138044	37521.6	25880	49536.5	45019	44961.7	134545	61813.2	78524	81801.2	54103.5	92975.8	31190
113.072@0.37	679965	594901	270951	633612	905569	225781	205761	178141	279570	130430	569627	576235	219339	301668	348034	194489	263515	136998	608598	675435	598194	140901	538829	221969	569600	577429	619121	644811	120406	341976	167212	191455	166531	147467	223196	374364	180649	1.01511e+06	898807	654624	141323	159433	626167	145962	256944	204580	636361	611591	620107
113.077@0.18	141834	177730	157193	476325	288278	346624	180630	69054.6	228008	243200	93520.1	65779.4	98486.3	83201.1	86719.9	88638.8	78464.4	89435.1	61646.6	96336.3	73405.5	63717.1	167070	76868.2	195743	69989.6	81352.2	82578.4	390852	388296	81351.7	79640.9	97755	116675	216562	96811.9	375038	488575	364745	71806.9	184851	129750	71712	360514	201504	229450	234874	73978.9	85453.6
113.107@0.19	20671.2	22961.4	28036.9	46782.5	29733.7	60939.3	47488.8	76311.6	66938	89774	92651.6	72711.4	92894.4	38652	61451.4	81188.5	41439.1	58643.7	78347.2	51942.8	39743	127176	53800	86143.7	45774.8	41015.1	61492.5	119160	66004.2	65078.2	26535.2	84432.4	138031	14795	1000	19754.4	39758.4	62035.9	88763.7	83754.1	33399.3	72327.7	35212.6	86044.9	77253.3	78839.9	89724.4	82439.5	98363.4
113.107@15.55	1000	1000	13480.4	48068	35714.4	38496.8	60744.9	28822.4	121007	56464.8	52416.2	83786.8	53815.5	81990	97472.1	53891.7	54555.6	58613.2	63385.2	48236.9	62060.3	69888.8	39745	63263.2	104504	92354.4	47606.6	101899	134421	87059.7	75951	129628	98708.6	1000	1000	1000	46214	205365	38407	39869.4	47007.7	57291.3	48929.8	38168.1	176269	39283.5	49593	59487.1	72620.8
113.107@15.42	1000	1000	13480.4	17433.9	34510.5	37770.8	86480.8	40452.7	48510.4	23078.9	30129.5	59698.6	134110	34633.6	284976	29440.5	214553	65876.5	63385.2	54336.6	69252.2	69137.8	19044.1	91871.9	130562	349699	180978	33885.4	46373.9	106904	28249	74329.4	43413.2	1000	1000	1000	31472	23404	29488.6	122441	25054.5	148873	59384.6	40894.2	54845.4	22132.6	153057	275413	73910.6
113.107@15.68	1000	1000	1000	52643.7	13495.7	20893.5	68373.3	28822.4	56023.3	70432.8	56346.4	302324	48587.3	54559.9	54571.2	28040.2	45673.8	37112.7	59227.2	25279.4	53911.9	71389	84788.9	26965.5	144967	64397.4	103375	40700.7	138055	173909	147001	108098	40785.3	1000	1000	19169.7	22506.4	32174.8	22493.3	27827.2	67590.7	129805	46580.2	50095.6	47335.2	23777.5	21136.5	247472	103700
113.107@15.23	1000	1000	1000	1000	18778.4	19507.1	14950.7	21998.3	34888.5	35949.8	45125.9	36154.5	18717.4	39616.7	58244.5	31109.9	28989.7	39358.3	266240	73864.2	107103	48638.7	1000	40947.3	38324.8	47177.9	66728.3	26943	115545	47411.4	33621.9	32625	111210	1000	1000	1000	1000	1000	1000	34472.6	47633	39149.4	29221.1	14950.4	60801.8	39608.4	23166.1	67245.7	142115
113.107@15.84	1000	1000	1000	14531.5	23786.7	20198	77094.5	145872	15637.1	51686.4	280636	78968.1	33190.7	75806	103204	22663.2	43539.7	45471.7	150535	351199	105079	142329	35278.6	30360	127840	85865.3	142349	35102	27824.5	53026.3	59914.3	104865	73008.3	1000	1000	1000	52268.5	45788.5	38085.6	339759	224847	103634	36670.8	31212.8	76435.2	97066.4	328799	44212.3	105443
113.107@15	1000	1000	1000	1000	1000	1000	1000	17107.1	1000	11832.7	11604.2	23712.1	30692.9	31112.4	21536.9	1000	42585.7	25416.7	26321.9	1000	31587.9	12214.2	1000	11790.8	1000	38563.3	19966.7	37246.6	35510	14136.5	16791.3	14636.1	25658	1000	1000	1000	1000	1000	1000	1000	1000	13689.3	11199.8	14719.7	1000	1000	27843.3	28205.2	29532.5
113.964@0.34	2.03871e+06	2852757	2.30042e+06	1.51614e+06	2.29539e+06	1926699	2.21859e+06	2147499	280135	899121	1.00008e+06	1.34585e+06	2.06759e+06	1.01558e+06	1559428	1.39358e+06	332369	1.90536e+06	1.3154e+06	154002	1.06794e+06	862812	934335	1.02999e+06	1.19726e+06	1414552	253334	530358	499824	197734	187785	543501	198797	1978714	2.2018e+06	2364790	1.86414e+06	2230224	1.69229e+06	1.62448e+06	1.97384e+06	1.43481e+06	1097283	1.02462e+06	924698	1.79618e+06	1.49402e+06	2.083e+06	424253
113.964@1	180187	216911	190114	186665	192484	207213	170496	182995	174448	190350	197429	177754	170194	172695	183446	166193	174703	185505	178749	1000	223034	181888	173559	179165	158013	186952	235641	190001	200895	205806	176880	179560	1000	217516	1000	200835	1000	167772	186117	206165	182295	196002	172944	180009	200310	167451	193659	170982	171044
113.964@1.64	362465	373434	376598	339489	347705	347493	360131	357439	378183	417613	430458	440751	400635	441418	443203	402186	443608	443146	439646	438363	438960	405107	420526	432596	409672	445314	454199	494388	491291	498460	466657	527681	481803	314223	336763	340352	323318	331244	300921	344686	333122	322519	350846	328895	315789	348755	334300	340503	362878
114.004@1.05	1000	1000	1000	1000	1000	1000	1000	1000	1000	1000	1000	1000	1000	1000	1000	1000	1000	1000	1000	1000	1000	1000	1000	1000	1000	1000	1000	1000	1000	1000	1000	1000	1000	11108.8	1000	1000	1000	1000	10141.1	10758.1	11609.8	1000	1000	1000	1000	1000	1000	1000	1000
114.017@0.3	300102	324955	268902	136757	210203	190154	242962	243148	188225	13058.6	1000	201363	237075	202992	235166	225457	219307	234737	191919	145060	179458	1000	199309	187941	211712	217926	215853	174522	182989	155883	174800	192201	196659	252467	254119	152980	157462	80463.3	106912	252881	233637	181948	205648	203540	196997	222187	179400	128162	124314
114.055@1.23	132899	206974	213216	195111	212251	133224	204758	183482	194642	198930	132231	139550	187187	192553	191394	174493	157132	180653	111594	176317	134351	173955	106686	105012	162008	106860	177527	183098	174419	184883	132068	118505	180555	127904	209595	205141	130287	106192	201985	171988	184202	109748	177640	190875	130944	121350	201200	114419	198327
114.066@0.16	108027	78924.4	122205	67079.9	66751.1	60249.8	55687	79247.2	66688.8	62645.4	67032.9	45286	67829.3	63401.5	72948.7	58058.2	53091.5	75650.8	31638.5	50662.6	40947.7	85919.1	60326.8	73183.9	61169.5	43471.8	64251.8	59652.4	39571.1	56661.7	44583.5	45776.8	81056.4	73157	42011.9	69882.4	79304.9	58693.6	13897.3	39274.1	57060	66311.9	44107.3	80692.9	54398.2	46832.9	43699.2	67347.2	63762.3
114.075@13.65	343398	333316	325200	331736	281310	324295	294055	333891	300530	289143	291667	308225	322613	312746	313944	342978	309164	331341	297506	281684	107984	309825	307758	111309	326365	296775	281487	326921	342494	331626	328896	311755	327270	128618	282072	331195	124761	328101	269918	301019	309768	125313	306458	118352	276288	293341	130648	123512	322113
114.091@13.78	133832	44973.7	97342.5	82669.4	74264.7	112654	109658	119355	125829	72709.9	117290	112093	97335.1	116775	82122.6	112977	88361.4	57357	91973.4	107943	104298	83928	56568.9	30397.5	92874.2	96543.4	95369.4	68930.9	66631.3	88163.6	81695.1	65750.7	83135.7	102265	76533.6	93628.2	100533	113053	47591.6	90584.1	128723	106875	116188	107554	46986.7	118496	104482	107617	99412.7
114.093@0.33	141332	51007.3	138833	76514.9	68081.6	79703.1	170409	131213	154130	133232	134681	92123.9	39957.4	174254	53703.7	163139	154223	167984	148201	158397	132937	147790	110584	149097	153589	140114	144288	74440.5	124929	126104	58860	96347.4	255571	86944.2	144885	140863	83065.3	119185	83673.3	65563.9	170941	177898	146830	165348	157037	159649	127853	104343	53886.7
114.096@0.23	27537.6	90366.2	37937.3	15577.4	69907.5	86961.2	99844.9	113400	94788.3	32235	140506	60324.8	42152	48033.2	40643.7	39316.6	80019.1	58093.9	28670.1	40262.2	98665.6	59443.5	52594.6	33471.7	79254.1	34111.7	150605	23939.8	74850.4	23821.3	58424.2	79540.6	29382.2	24687.5	27641.4	24292.3	126132	117586	30173.4	90781.4	133425	97578.4	100823	32853.9	40950.7	45532.2	33190.9	120446	208577
114.097@15.29	74185.8	113955	135174	59518.3	103310	40321.4	112634	58302.8	156147	61628.6	46169.2	31064.3	50545.2	138245	49590.8	139725	101267	103161	65208.3	21277.2	81214.1	117382	24910.6	87075	437519	44967.6	139985	28117.6	121603	68117.1	68656.6	39647.8	144107	90423.6	28383.7	46862.1	80910.6	50374.4	89147.5	109889	61256.2	84930.3	146025	75961.8	102686	117260	137335	94529.1	48680.2
114.098@15.43	99529.8	57704.8	31827.1	105702	99428	107461	113519	60910.2	134491	24712.1	31293.4	148136	62867.9	69114.3	113169	69069.7	285812	160397	390482	147282	116295	118357	67352.9	95594.8	76168.3	368714	124894	186139	149519	309905	110523	75456.6	46015.1	16699.8	55269.8	33865.2	53618.5	40916.6	79539.6	102133	136281	65403	128357	73159.9	62859.1	150165	53469.7	52277.6	289840
114.099@15.96	42718.5	116271	107126	44700.7	82748.4	68869.2	147589	57305.5	62649.1	148345	111829	123603	114502	97621.3	129108	123743	83872.2	51085.2	91388.4	62713.8	113077	189805	107073	851792	130168	81690.2	129577	80271.6	130323	113781	58382.5	44384.7	35670	65080.4	70281.7	85483.4	128421	130641	137998	88633.6	84327.1	43299.9	564191	35675.2	152463	80003.3	82644.4	85301	46168.4
114.099@15.55	76384.5	123931	116488	128546	82976.3	19924.1	112200	134323	152905	94464.9	154704	70384.2	411531	119393	135678	418980	63990	93700.6	83629.5	126408	197061	138274	116069	37700.7	131319	112151	99017.8	183085	109066	102130	412722	58805.2	83167.6	29558.9	111657	130174	129511	132350	43263	82665.6	97836.8	110479	30230.3	106702	166331	124449	79594.4	127334	93186.6
114.099@15.71	77150.3	55967.6	126155	67847.2	116292	43180.5	155084	89925.7	139746	134906	153766	117377	103264	51849	97406	147006	58479.4	159561	89847.7	100975	190329	60570.8	147052	74679.9	76135.8	92803.2	87943.5	870596	140004	108994	256692	453682	123775	154927	69912.5	52409	103686	80863.5	60306.8	127405	137693	124686	68189.8	70146.7	138448	127664	50342	100621	601749
114.1@15.85	86590.8	138406	69861.1	44700.7	73490.9	98258.1	89796.2	81500.2	146805	148981	72132	99172.1	67599.7	58569.8	136675	159953	156691	78501.4	483686	66705.6	70584.1	151621	57096.9	64072	153338	94333.6	51265.6	176534	225960	172584	86233.6	44384.7	61828.4	42850.3	88293.1	103797	62298	85515.8	103149	73730.1	97626.9	38163.7	86440.6	37929.1	62533.6	116767	142236	117580	138836
114.128@1.43	1000	1000	1000	1000	1000	1000	1000	1000	1000	1000	1000	1000	1000	1000	1000	1000	1000	1000	1000	1000	1000	1000	1000	1000	1000	1000	1000	1000	1000	1000	1000	1000	1000	1000	1000	1000	1000	1000	1000	1000	1000	1000	1000	1000	1000	1000	1000	1000	1000
114.983@1.05	35438.2	32048.4	1000	19129.1	27153.3	1000	18663.4	10179	18241.5	1000	28428.8	32122.8	32610.5	21604.3	1000	30846.5	10715.9	32612.8	21275.5	19689.6	33879.9	30016.2	1000	28802.2	31776.4	1000	18446.6	34557.4	34786.3	30377.9	31912.9	34678.9	34321.1	16209.2	18645.3	17328.7	17846.9	16197.1	16732.3	20876.4	18809	17205.8	30922.5	17747.4	19308.8	16818.8	21936.1	16214.4	17824.5
115.05@16.07	73911.7	51799.4	131607	27834.7	237430	117489	385820	132438	587739	548681	272785	93779.1	28738	101122	45861.4	31014.3	37229.4	387338	27026.6	435946	464186	281791	115108	52058.5	120552	431396	471342	51794.1	24938.1	63313.5	68322.9	32312.6	305817	47678.2	122624	49853.7	125668	21922.2	332378	470277	527755	337696	207586	409289	457837	23304.5	108826	109144	111447
115.051@0.19	47732.2	41575.4	100804	81506	85693	152820	89487.2	84946.7	103250	100335	102073	80537.5	80409.2	97403.3	43813.2	98075.7	72395.5	59079.4	32267.5	38159.9	69290	54557.2	83016.5	61154.8	65574.7	45582.9	34789.3	64417	118494	90848.1	53954.1	67158.8	71270.7	52017.8	52395.2	101602	104663	156396	164824	94441.7	99471.9	71802.4	94211	101493	92860.2	95785.4	122200	90983.3	75101.6
115.055@7.2	79196.8	100313	111872	79553.6	92673.5	91826.7	94504.9	85445.6	89039.9	78423.8	80836.9	82346	90815.8	74308.1	80094.9	72041.8	94227.7	72689.1	82468.7	77855.1	85419.5	67680.5	82875.9	77606.7	68623.5	75044.8	71528.6	91738.6	74574	72076.6	82512	73249.1	74267.4	115342	101258	123217	78172.2	91414.5	108105	94413.1	89721	95768.8	88534	85994.6	100357	85760.5	88108	92887.9	78342.6
115.076@14.77	1000	30488.2	18252.4	32028.4	36857.7	75318.4	68229.9	51488	17577.7	49104.2	36428.9	77637.1	49689.5	43087.7	65455.9	50302.8	78854	23265.8	66048.7	23342.7	30816.9	72498	67964.3	55284.5	37176.2	36552.1	48845.1	60618.9	41482.4	69896.3	19870	282661	27747.7	12797.1	24868.8	16089.6	68342.7	52747.7	13649.4	70153.6	69147.1	58939.6	288710	57002.9	52361.9	51410.1	53868.9	22639	51893.3
115.076@14.63	1000	18197.2	76184.8	45045.4	41839.7	72520	42767.7	75489.9	52184.9	66913.4	57199.8	75863.4	46895.9	61476.1	61953.5	31851.3	52787.7	52955.1	55571.4	68859.6	66291.6	67176.2	75584.7	63165.7	74508.8	32837.3	67179.2	65634.6	38424.2	305549	52695	60004.5	23698.7	45674.2	58079.2	62496.8	33458.3	50904.4	58505.4	82170.8	54417.6	44077.2	47957	74000.5	81527.8	50047	56965.6	69544.3	78299.2
115.076@14.95	1000	1000	1000	33780.3	17164.2	38212.3	19386.6	38314.7	18872.1	1000	18603.8	33432.1	11066.3	34788	28578.2	48246.3	32610.6	32329.1	27147	40147.7	30995.9	13510.8	24898.9	17440.3	21760.6	48357.5	53009.1	45754.6	49671.9	36263.9	43161.7	43139.8	17627	11511.4	13441.7	1000	11714.7	25247.9	38804	42488.2	1000	34311	19515.7	46966.6	39223.8	49203.9	29292.8	45732.3	34841.6
115.081@1.25	1000	1000	1000	1000	1000	1000	1000	1000	1000	1000	1000	1000	1000	1000	1000	1000	1000	1000	1000	1000	1000	1000	1000	10998.6	1000	1000	1000	1000	1000	1000	1000	1000	1000	56410.9	100076	55310.5	96044.2	106600	81315	95323.7	98356.1	69647.5	92490.4	74353.4	99181.5	101155	113724	71980.4	100477
115.085@0.18	35510.8	33246.6	58387.1	17571.9	15987.2	32183.9	39628.9	52426.6	50655.9	37579.9	59480	60423.3	29961.3	20778.5	49276	45272.9	44442.4	40385.2	66961.3	27594.9	28844.6	27531	41543.9	28701.3	47418.4	22349.2	47800.6	27754.5	30464.2	98900.8	25834.8	26165.2	22382.1	40582.9	11706.8	13918.3	69982.9	71786.1	64184.3	21016.5	44373.2	63570	47305.4	33096.6	82553.3	48920.9	22693	53796	33571.1
115.087@15.7	1000	1000	1000	20182.1	17512	12862.7	14084.9	1000	39840.7	46508.2	49734.5	37583.7	24026	16374.6	67178.6	45869.6	19550.4	45549.6	76092.8	10505.1	38146.8	107750	34816.6	27023.9	52994.8	17517.5	22699.2	21779.8	66101.1	59340.7	22527.2	24255.1	37835.1	1000	1000	1000	1000	17947.9	1000	1000	17644	16404.8	13280.7	29992.7	11645.5	40873.9	17026.3	23916.6	23672.9
115.087@15.92	1000	1000	1000	1000	1000	10888.6	28870.9	17155.5	34747	19998.5	14115.2	20771.1	60440.3	32711.6	15904.8	14402.5	33485.6	32023.1	27077.1	51897.3	31402.8	19958.5	94739.5	12501.6	35953.3	38379	27915.4	20658.6	14502.3	53792.1	28764	19181.5	58686.1	1000	1000	1000	1000	20608.4	1000	53457.5	27062.7	30889.5	46414.9	21938.3	36005.7	45454.7	35487.9	20906.7	19852.5
115.964@0.4	252255	116961	223905	173505	162153	158789	96892.9	181065	158182	164103	172118	160816	148195	139319	159816	165551	136037	139267	67342.8	138612	157112	149357	141667	142958	127846	129181	128868	68306.5	146492	142456	157418	162820	166071	224457	228098	182414	198002	174342	83098.1	157060	167658	88307.1	166531	167051	153500	148639	155073	152576	151159
115.964@0.29	404285	410246	406137	213174	271836	256830	333013	336050	274194	255031	243271	290569	326388	249160	282375	275128	285995	305491	266411	258776	270578	250788	273096	264233	256709	276377	274815	121074	182711	184834	192859	187793	186770	395935	409753	344676	242590	264570	227283	291853	306857	270250	271196	235951	253510	294024	277002	329511	273367
116.034@1.22	661431	653357	654219	623780	625150	626055	615244	611908	600190	535689	573888	540632	479159	469937	464074	359576	358076	353667	258890	264496	267755	210679	213858	208130	196278	197610	214174	215005	215060	218389	231133	226669	227740	663573	636322	653408	619123	585712	635860	603046	565336	600077	544910	541583	560846	517825	523597	492859	435937
116.071@1.19	161032	184558	176078	168593	157545	193867	163808	161007	191435	168267	162121	146725	142557	164542	148257	142886	148767	144139	139173	133992	130670	128395	131195	143859	137266	118705	135886	123675	124229	134997	126436	131962	120641	386917	381772	330009	386650	352838	367267	383580	373318	376183	374717	376264	347117	331592	381703	350330	302413
116.071@1.32	42251028	43611370	45682384	42027876	44435172	43847604	42943892	43729650	44231884	42135020	43176172	42983860	41925660	42101500	41935720	40132730	39967012	40470868	37891330	39258950	39442570	38004750	38497892	38743376	38064748	38297212	39636252	39254120	39179184	39973740	38113944	40285080	40374800	33156036	35429420	34900384	33830748	34920304	35651040	33762910	35878160	36313292	34359064	35674196	36178700	33527288	35894976	34376850	33798720
116.107@0.33	1.22589e+06	1.26317e+06	1.26412e+06	248377	1.04226e+06	778193	699493	254674	900315	212298	212751	198781	180815	162567	181919	166828	526188	192965	149299	427603	488445	453591	139887	90242.3	468118	341670	335226	104411	180256	109931	108367	103956	92158.8	1225575	1.18169e+06	1.17644e+06	1.00928e+06	972976	976536	913345	274649	729548	791424	238777	642472	183791	623518	199321	191014
116.107@9.11	125955	123840	122966	130399	118603	128956	143592	135215	132562	122080	115704	127213	120723	124599	117580	214693	206962	115487	116069	206376	206556	202615	112845	191622	205439	204422	206853	207741	205414	189579	205058	187883	196513	125732	119241	120101	114477	110508	121544	121614	119924	115500	129498	112664	123121	127112	214532	124129	200708
116.143@13.65	36883.3	26078.4	84523.8	443938	13674.9	389870	17947.5	16741.5	24792.1	166005	18969.3	120579	1000	69086.6	10687.7	1000	25831.8	1000	1000	11426.4	20870.2	1000	1000	1000	1000	1000	1000	1000	1000	1000	17211	1000	1000	49128.7	87157.5	57411.6	231776	15342.1	33740.4	274817	340229	346838	29529.7	10567.2	163662	1000	23669.9	12950.3	11419.3
116.966@4.69	266306	3.40704e+06	3.22985e+06	229743	237578	236846	227919	223024	198497	215048	198248	224296	220119	220304	2.86922e+06	227664	206191	199233	210493	217418	199794	197859	202276	213231	225681	215884	211426	184370	201432	190376	217712	210485	2754734	255278	226540	232069	218632	224026	212605	227260	226226	218014	221417	218904	206146	217275	217620	215397	193666
116.966@4.54	259244	258546	233673	221914	214017	209580	227726	196975	195259	220976	213800	222304	205265	207859	220551	222155	191640	210842	200294	204670	194109	219046	207641	209726	205852	217927	203890	194588	198646	185968	219664	218373	192199	255650	246231	224391	210266	215622	231074	225936	194048	217234	217733	217240	224012	216961	211693	209972	197529
116.966@4.35	260632	234379	222675	205096	231756	210460	214827	201281	214246	220740	205020	226004	200819	205724	204668	212293	212258	215943	189834	203577	198988	210482	198087	194403	175293	207075	181186	202131	202668	198197	205820	208546	179676	231510	244322	249115	207043	223249	229671	211896	211336	189091	193999	191530	203867	200024	206929	202993	182796
116.966@4.99	252425	239782	249290	240384	2.95194e+06	224394	2989965	3.00805e+06	206579	216565	196644	2995609	204028	216798	234123	207510	217646	212930	197222	215371	210765	201082	197257	201133	198828	202455	208880	192838	2.7482e+06	204530	213501	207561	205111	257212	228455	231019	219401	226074	239776	2.86434e+06	195413	220849	210614	221370	212514	201294	214236	218221	2.77767e+06
116.966@4.84	266873	241744	251799	243984	217868	216595	224533	214809	2.8326e+06	227818	2.83992e+06	203652	2.95361e+06	215726	232215	3.0468e+06	2.74856e+06	213330	2800197	214123	228650	197114	197664	2.67336e+06	198517	2.70112e+06	218516	2678288	199196	183548	216226	2.66657e+06	191419	226827	252576	3.36239e+06	2.8856e+06	220453	239337	209961	222619	223429	203716	191649	200085	2.8403e+06	226924	203273	224963
116.995@1.31	31049.9	22772.9	21192.1	11444.7	37361.2	13316.5	42364.1	46505.3	46712.5	43353.8	35093.4	43930.8	39339.1	43270.3	46317.1	47000.5	38840.3	45132.4	45087.9	38476.4	47685.6	37606.8	38591.8	49452.3	40744.5	32792.6	44685.7	45184.3	42660.1	44456	46823.1	14561.2	41576	1000	38538.1	10252.6	19141.5	13273.8	35342.6	32539	32194.2	45940.3	10811	1000	1000	35298.3	30826.2	40811.9	1000
117.022@0.2	13172.2	16513.3	32769.6	151914	69141	211987	35678.5	42122.6	36519.7	31422	40433.1	37497.8	33397.2	30067.6	35064.5	37947.2	29999.8	30015.1	15794.7	31828.2	36318.8	43484.5	28831.5	52125.1	45672.6	34410.5	21605.7	31280.6	51242.1	53320.8	26608.6	26355.8	35138.8	1000	1000	1000	217653	194833	223039	37181.7	36522.8	43321.1	24351.2	34078.6	32875	25070.7	24647.5	30902.8	32941.6
117.058@7.2	119988	126723	134372	126107	143515	137204	130634	138615	133945	124663	128977	132686	123414	131012	133370	113762	117911	125102	116256	120220	123957	115138	121282	129149	117752	117215	121781	125058	119604	127301	119122	129326	135246	148677	144381	148701	131918	133587	152052	146089	150547	148189	138225	139200	142106	130215	139716	142320	128569
117.068@0.17	17354.2	1000	14454.7	1000	1000	10951.8	1000	11888.6	12988.9	11966	27210.1	1000	13389.1	1000	16965.1	14988.5	12909.8	1000	1000	1000	14218.4	1000	12731.7	1000	10729.9	10995.6	15961.3	1000	18772.7	10221.7	1000	1000	15541.4	12099.1	1000	13441.3	16704.3	10008.4	1000	1000	15842.6	11373.9	14951.5	15836.1	15655.3	1000	16332.4	1000	14383.4
117.091@14.63	10019.5	38705	40447.4	303404	311796	322433	329489	303411	316386	325285	341853	334194	333753	326283	339101	341572	330810	339863	334545	341705	363464	360075	363124	352101	327851	337846	344457	306089	302663	291675	262488	295714	315938	170500	86995.7	219145	26994.7	314371	332988	321575	314614	315030	302455	311390	326159	313900	299441	340374	342032
117.139@0.16	494819	148631	241361	34792.3	31841.6	32760.6	18487.7	27686.8	36624.1	55195.1	34356.1	55057.7	102066	45498.4	24786.6	23970.2	20987.4	30094.4	12902.1	18746.7	12957.1	13581.2	15655.4	14191.1	1000	26698.7	1000	1000	1000	1000	1000	1000	1000	47202.8	32216.8	45250.4	40085.7	72823.4	47010.3	39833.6	80279.6	93055.1	51770.2	185272	41204.6	28629.6	21549.8	38230	1000
117.96@13.22	1000	29692.7	16610.4	1000	1000	25230.2	10656.8	27031.5	15028.7	1000	190855	18925.9	24346	15403.5	30400.2	209690	22274.9	15776.4	32795.1	11236.5	11286.1	1000	12419.1	10561.3	21027.8	24444.6	24779.1	31012.6	1000	15121.7	32452.9	20211.6	19143	1000	13533.4	10301.7	24778.2	63518.5	34817.9	18704.3	10908.6	31650.9	11451.1	27932.7	15780.7	1000	11448.8	27017.1	10403.8
117.96@0.39	92245.2	92249.7	92022.1	65545	61930.7	69674	41206.3	67920.4	62101.1	56482.9	70167.1	61340.7	61409.6	55807.5	63350.2	63600.4	52626.7	57226.2	55957.3	53951.9	59609.8	56260.9	58807.4	58826	49159.6	52200.1	49383.1	53843.9	57446.7	25928.5	61263.6	64768.2	63659.7	27075.2	23472.6	72658.6	78662.6	28428.2	61152.6	59981.9	23074.8	32515.1	69602	65703.9	59763	56641.6	57994.2	61121.3	59690.9
117.96@0.29	163764	168426	145665	81211.1	85678.6	83075.2	132961	117232	108910	102463	93911.6	108252	134765	97069.2	111397	101834	115938	120913	108499	110633	101866	90810.5	111483	103817	104841	103142	108372	66852.2	75586.9	70633.9	83655.3	74685.8	83422.9	144697	128365	130181	79920.4	109107	71593.1	106701	122342	112556	98295.1	93791.4	99121.4	115665	118237	126204	115039
117.97@1.05	25947.4	38206.7	42689.6	46041.8	38700.8	46640.8	65775.4	46475.3	48987.6	66783.9	41661.3	48266.5	35306.2	44013.8	43073.2	33241.5	56297.7	43046.4	58159.3	40361.6	52873.9	46886.7	44920.9	43985.2	45012.2	45957.5	38875.2	48580.9	42824.6	57112.7	42189	37582.9	62570.4	40463.5	27167.1	34575.5	44811.4	35599.3	36622.6	46814	53725.5	43823.9	36286.1	31924	31036.3	39803.9	50760.6	38167.1	38278.6
118.035@1.05	39363.5	40632.8	41676.7	40522.5	46094.9	40071.5	41784	43584.5	42922.8	41399	41546.7	41255.2	44628.3	43832.8	47353.7	42102.9	47107.9	43567	43188.6	46804	49337.1	45103.9	49853	47319.6	50974.9	47724.2	69087.2	53687.1	55153.4	53939.8	54505	56010.6	59107.9	67556.6	64074	64191.2	63246.4	70127.9	62043.1	66635	72071.2	68631	68392.4	66835	74836	72134.2	72618.8	70301.5	71936.7
118.065@16.03	2.48988e+06	2821422	2567898	2438627	1905599	1.77618e+06	2.64551e+06	1.82638e+06	1.84195e+06	2544177	1.80532e+06	2.56649e+06	1.90961e+06	1.78761e+06	2.50013e+06	2.29646e+06	2.18077e+06	1.7936e+06	1.75975e+06	1.67419e+06	1.48589e+06	1.91683e+06	1.68949e+06	1.87171e+06	1.82968e+06	1.84856e+06	2.53446e+06	2.40898e+06	2.53785e+06	1.72207e+06	1825887	1.72807e+06	1.6545e+06	2.65963e+06	2.89062e+06	2.67639e+06	2.30005e+06	2.22424e+06	1.64763e+06	1.86313e+06	2.90308e+06	2.845e+06	2.01639e+06	1880981	1.89895e+06	1.82648e+06	1.80255e+06	1.82879e+06	1.82416e+06
118.065@0.37	1.97511e+06	1895873	1.95464e+06	409758	1.42215e+06	1.35239e+06	1.77798e+06	1233028	2.01741e+06	429174	1.77267e+06	1.40665e+06	1698899	1.99705e+06	1.06549e+06	1.16919e+06	1.48576e+06	1.83926e+06	763863	1.9187e+06	1.76512e+06	1.27027e+06	1.72073e+06	1.25761e+06	998592	856179	953598	1067273	1.26516e+06	998305	1.16065e+06	1.21888e+06	1111045	1.30732e+06	1.48874e+06	2.18261e+06	506522	1.46948e+06	1.36754e+06	922501	1.19423e+06	1.33841e+06	1.19545e+06	1.16604e+06	904032	1.73855e+06	1795554	1.36172e+06	850685
118.065@7.2	2.58353e+06	2736779	2.79008e+06	2.37372e+06	2.13916e+06	1.91935e+06	2630838	2.08984e+06	2.59482e+06	2.48537e+06	2.61397e+06	1.94029e+06	2529692	2.40714e+06	1.81878e+06	2.27748e+06	2.30072e+06	2330110	2.24099e+06	2292744	1.78519e+06	2.2137e+06	1.77056e+06	2.43432e+06	2220684	1.69199e+06	2.25595e+06	2483082	2.47036e+06	2.40309e+06	1.77188e+06	2424960	1932213	2.03406e+06	1.97063e+06	2.15841e+06	2.48497e+06	2.73679e+06	2.35038e+06	1.88051e+06	1985061	2.7293e+06	1.93097e+06	2.71018e+06	2.55555e+06	2.57533e+06	2.53898e+06	2549052	2328960
118.086@1.27	126350	111338	116855	221821	152024	144371	132504	132849	115395	225387	124372	131662	130437	200911	127418	128424	229734	151022	142050	132033	144272	128106	164627	153139	168560	128980	140303	142622	135584	200505	183507	151344	193076	44169764	45583668	43745830	42704390	44487292	42247236	42670828	43569550	42075668	42640820	43617640	41987228	41470692	42672710	40637816	40975144
118.086@1.49	27639750	29584972	29390816	27203544	29292456	29120960	27295006	28207070	28079014	26614168	26940796	26646714	25478726	25786986	25872528	23349346	23932548	23939728	22186928	22700298	23235196	21755256	22476814	22682972	22040344	22937108	23834574	23881930	24641942	24123644	23321154	25109120	25247914	33056456	33668890	33725268	32545636	33570988	34310316	32059400	34217052	33174228	31143358	33251374	32219412	31571492	32519926	32133814	31185412
118.123@0.23	95881.6	39814.3	108832	61622.3	54448.8	67894.7	89635.8	92056.2	87215.8	83629.1	80208.7	69743.9	66442.4	60807.5	64527.9	43676.9	51536.5	77316.7	59641.3	55169.4	61028.1	35026.4	41175.2	31726	31507.3	52482	46493.8	61635.1	23216.3	30416.9	37555.7	69015.5	43391.4	130053	107718	125274	74812	25081.4	46118.1	82967.5	93398.4	80392.6	62741.2	84583.8	61849.7	48820.5	59676.5	1000	45822.8
118.123@1.23	1000	1000	1000	1000	1000	1000	1000	1000	1000	1000	1000	1000	1000	1000	1000	1000	1000	1000	1000	1000	1000	1000	1000	1000	1000	1000	1000	1000	1000	1000	1000	1000	1000	42724.4	47758.1	20691.7	48508	48543.5	18728.3	37101.5	39968.2	40392.1	37141.1	47678.9	43043.3	11792	50939.9	26230.8	42403
118.943@4.83	67392.5	68360.2	66618.3	57560.4	686227	63324.9	66666.2	28511.6	59938	59527.1	58294.3	67581.7	57827.8	760331	59577.3	67105	702302	62979.9	63579.7	75236	61470.2	67297.6	56969.7	60888.9	67002.6	65007.7	55356.3	868152	79786.4	79345.2	74055.3	877833	76756	57327.7	50751.7	58574.9	57694.9	60313.5	61759.7	59943.1	678116	65997.9	63240.4	64192.2	68713	71233.3	47435.8	26197.4	58657.4
118.943@4.98	838919	59690.7	729091	62550.3	43707.7	743499	64668.3	67650.6	716497	63592.2	56314.2	68479.6	64065.1	67229.1	55138	69802.3	58715.7	763711	683710	69801.3	769986	66318.8	58705.4	59780.5	772638	679581	63845.6	73870	81140.9	70136.8	973459	71273.5	937029	736366	58275.5	44239.9	57009.8	61862.6	63416	67514.2	64275.7	747807	59830.1	58486.6	57301.6	740157	66876.1	53688.6	726903
118.943@5.14	64204.5	61416.9	43489.4	56605.4	27142.5	33607	51195.2	768310	44610.3	30070.1	14097.6	763043	48678.1	57875.3	41284.9	775711	44645.3	46295.8	28338.8	64794.6	60102.6	775042	732099	33279.4	59590.1	47165.6	60002.3	52432.7	52092	47301.9	79229.4	61100.1	69718.7	44968.8	37048.1	731487	46084.1	759326	735927	733824	51073.9	62906.4	756523	712625	728830	50490.3	749838	41367.5	58182.7
119.049@2.19	1.92488e+06	1.86691e+06	1.93082e+06	1852724	2211521	1.8795e+06	1.97769e+06	2.09253e+06	1.93665e+06	2.06905e+06	2.10375e+06	2190940	1.80057e+06	1883453	1.86061e+06	1.77095e+06	1855998	1649831	1624299	1.71836e+06	1.75727e+06	1647632	1.72151e+06	1642613	1.64493e+06	1.63805e+06	1.74819e+06	1.47837e+06	1.48087e+06	1.44336e+06	1.41578e+06	1.64442e+06	1.76715e+06	2339812	2.48916e+06	2.52169e+06	2.34139e+06	2.54023e+06	2.61937e+06	2.35201e+06	2.46665e+06	2.50047e+06	2.25608e+06	2.42967e+06	2356212	2.1699e+06	2301430	2215753	2106461
119.05@1.98	517815	651880	713079	449144	744147	562540	595736	745804	660274	511355	744372	723934	473316	623204	614292	469961	614278	564656	384594	510162	597221	1000	524831	527356	461122	512987	555190	1000	441965	481154	277469	1000	349400	711314	829653	862753	723035	750371	790166	626384	875165	867386	666643	775520	769690	585515	771937	784208	599759
119.068@16.03	260176	162247	256039	168068	250712	225072	216981	202164	227866	213269	225687	205914	253056	244607	209420	195520	146406	239247	185150	207010	167944	247745	243281	234606	223027	236919	168797	221335	180643	234140	175610	212089	206093	222917	260483	253516	206902	181918	212231	241747	241199	183290	243218	250363	209396	236510	226899	252073	198513
119.068@2.59	1000	13530.7	1000	1000	12022	1000	1000	1000	13917.3	12598.6	14316.1	12235.7	11348.6	1000	12145.8	1000	13582.1	13306.9	10372.7	11635.3	12690	1000	1000	10778.1	1000	1000	1000	1000	1000	1000	1000	10406.3	1000	11616.7	10812.3	1000	1000	1000	1000	10376	1000	1000	1000	1000	13353.9	1000	1000	1000	13617.9
119.074@5.28	77102.4	31120.6	84889.7	97707.4	49284.9	109210	115601	104654	98230.3	99955	116196	122878	86648.7	70936	79636.4	74674	70691.8	46956	82412.5	87550.3	93385.1	82689.1	85855.2	85004.4	59734.5	70688.4	71338.6	72540.7	72845.8	67979.7	90062.6	82176.4	86282.6	142650	151543	153712	144089	171321	165109	160975	174806	178612	174136	186534	180940	148694	170438	150310	160408
119.089@1.28	15193.7	1000	1000	13321.4	1000	1000	1000	1000	1000	1000	1000	1000	1000	1000	1000	1000	1000	1000	1000	10071.1	1000	1000	1000	1000	1000	10099.5	12864.3	1000	1000	1000	1000	1000	1000	2.55107e+06	2.62662e+06	2528970	2.453e+06	2579078	2.45359e+06	2453477	2.50603e+06	2.43266e+06	2.45739e+06	2.52651e+06	2436993	2385239	2453875	2.32253e+06	2.39277e+06
119.09@1.48	1.50834e+06	1.49595e+06	1.48414e+06	1.33247e+06	1.61397e+06	1.4632e+06	1.3932e+06	1.3882e+06	1.35965e+06	1.31652e+06	1.35631e+06	1.46454e+06	1.39205e+06	1.41912e+06	1.41454e+06	1.15199e+06	1.32044e+06	1.3283e+06	1117189	1.25938e+06	1.27048e+06	1.19445e+06	1.11148e+06	1.22834e+06	1.12522e+06	1.21713e+06	1.16456e+06	1292075	1.20773e+06	1.19628e+06	1.27959e+06	1.25455e+06	1.28757e+06	1.66193e+06	1.69479e+06	1.72639e+06	1.7897e+06	1733921	1.73467e+06	1.57715e+06	1.74519e+06	1689023	1.54174e+06	1.6991e+06	1616167	1.62177e+06	1.67997e+06	1.72422e+06	1.56169e+06
120.003@1.17	15208.5	13169.6	20500.2	23178.7	27012.8	27396.1	38143.4	46922.2	47335.4	66195.1	68846.1	71226.2	82156.9	85948	90035.1	119021	124731	130127	186699	193979	194867	268702	262984	258600	271152	278864	282218	273221	304453	274496	276948	285561	285807	21543.7	26564	22647.5	23302.8	30704.1	25644.8	45612.7	42572.8	52445.6	64270.5	63713.8	77424.4	91585.8	95242	96365.8	130931
120.056@16.07	1.13582e+06	219969	1.21602e+06	158017	383445	320347	146163	380248	287581	321222	125944	421938	139513	512559	235829	928312	577324	96701.6	158241	326745	296937	286723	1.07392e+06	223921	187839	177055	339559	776017	957290	127398	1.2833e+06	387138	183491	923590	846622	1.16169e+06	197864	380675	614279	322413	348114	349895	327885	727136	317862	193635	319761	286391	273503
120.056@16.96	105437	75086.8	142121	133226	173276	182740	180036	162658	90794.3	149946	48479.2	150155	66888.7	48924.8	162726	84599.6	180647	171590	94518.7	167759	157842	139316	87802.5	148289	77810.7	181411	171910	263163	60683.8	277551	129645	184259	239919	133373	102146	89432.2	102670	192296	62570.2	89831.3	186083	150913	62316.4	49614.3	78886	153801	126142	66615.1	72861.8
120.066@1.23	6141765	6.09315e+06	6.16312e+06	5.75262e+06	5.8662e+06	5834063	5779456	5.6955e+06	5699177	5.40454e+06	5.44762e+06	5384078	5137372	5170375	5.15456e+06	4.8402e+06	4819788	4.70871e+06	4.52281e+06	4528961	4.52969e+06	4.25267e+06	4.31895e+06	4.2723e+06	4.37368e+06	4356603	4515192	4724782	4.67354e+06	4716673	4764538	4.80934e+06	4.84083e+06	6.17714e+06	6.2352e+06	6.27633e+06	5907186	5.9999e+06	5988497	5.81954e+06	5855035	5.84244e+06	5.5835e+06	5.68976e+06	5.62282e+06	5.43058e+06	5.49152e+06	5.41502e+06	5.21567e+06
120.081@10.84	26806.7	32698.5	25796.7	1000	20023.1	27590.5	25576.2	23605.1	25733	29946	30276.9	29480.2	38722.8	41179.3	43067	55746.2	43959.5	62513	64870.1	68069.1	61041.1	83515.6	83204.7	91579.1	98824.5	99257.7	99352.6	75365.1	82870.6	78843.9	79261.7	88068	86138.8	117621	108434	104960	106075	110575	105122	99761.9	104035	99512.9	98154.8	102073	98626.2	118608	118558	110949	127952
120.081@10.59	20233.3	29338	26684.5	20459.2	10655.7	22306.8	23336.4	24102.4	24585	30457.1	31817.7	30352.9	38263.7	37782.3	39906.4	45841.6	45022.9	45423.3	35875.9	52529.5	38839.7	53207.3	58417.3	58380	58377.6	57292.1	57572.1	56146.9	55191	55874.7	43365.2	46339.1	53818.4	65640.4	63524.4	68388.6	60156.8	60836.2	65075.1	70570.3	76464.2	65604.9	81045.4	77335.8	72295.8	94798.7	92409	89459	100478
120.081@12.09	159372	171828	166611	158421	167186	164018	164700	165551	164637	149927	143591	145376	143835	135976	125876	139728	143191	135965	121773	134899	139996	147820	144120	123746	120565	120843	120377	104134	82117.6	83584	73860.7	79944.9	69799.9	153772	147178	167692	164415	162173	150254	144031	140036	138414	136175	125828	129103	136182	141746	142967	114644
120.081@10.29	21085.2	23791.5	29906.9	29762.5	26175.1	1000	12664.8	17745.8	10290	1000	1000	1000	11373.8	14910.6	18471.5	1000	16647.3	11972.1	15789.9	16168	14944.8	15339.1	16892.4	15702.3	1000	1000	16195.6	13306.2	11641.7	1000	15967.9	15877.9	12806.8	148066	139039	128668	126357	138527	131384	128836	139170	127758	131077	129615	116420	119182	133766	114945	111804
120.081@5.28	56506004	60861676	59643796	58133116	59643260	61232160	54130064	59855480	56712900	55766424	54628930	57136028	48819732	53204504	51528696	47532724	46284810	48784344	41968670	46015468	47214684	43976296	46450896	44595396	45198700	43956996	47633012	43072056	46892256	44991336	44790856	45461204	49923836	85206620	83738570	87392140	80897490	91311224	90064670	86358390	89656584	90099380	84800300	89228050	86676540	77813630	88464440	79489416	81529490
120.081@6.71	88405.2	98791.7	80027.6	91934.5	39126.3	38271.3	59889.3	76322.1	55767.2	76791.1	44800.2	65739.9	58184	66825.1	50087.5	64402.1	54288.3	59992	40599.5	56211.4	65709.6	42570.4	63424	48153.7	57973.2	44013.3	57093.8	49247.8	53480.9	40250.7	53704.1	43922.2	56648.8	688317	563779	664404	513774	547890	501575	439042	515212	449966	395304	425895	370373	396947	365351	351236	255846
120.081@5.62	1000	901258	1000	1.28834e+06	1000	1.05448e+06	1000	950538	1000	1000	701953	979697	1000	966987	1000	1000	1000	1000	1000	1000	1000	1000	1000	1000	1000	1000	1000	1000	1000	1000	1000	1000	1000	1000	1.16615e+06	1000	1000	1000	1.65613e+06	1000	1.44725e+06	1000	1000	1000	1000	1000	1000	1000	1000
120.081@6.35	171245	186184	144814	173798	129981	178614	123174	159858	107577	163770	105874	147433	94414.4	152105	109429	130708	93666.8	126515	86899.3	119306	126903	116216	131668	94831.1	122307	88681.2	126998	86946	1000	87124.9	118506	84377.9	119916	671910	224968	660284	125675	432360	617106	625266	603768	590631	530304	593174	537900	211028	586153	1000	506819
120.081@6.22	234737	255717	163844	254569	166905	241673	155801	208502	141659	206475	145570	194884	150946	202753	148077	146588	123953	162868	113915	149243	156564	167195	157064	109910	163441	106993	166859	117614	151642	108188	148437	115302	170228	359783	478837	306067	622984	383883	408896	1000	1000	269703	1000	1000	340919	537079	1000	547740	287637
120.123@5.28	1000	24797.2	11745.5	18851.9	10901.5	19226	11623.3	32642.9	14521.4	10135.7	22377.1	1000	16078.6	25952	17987.8	1000	1000	22194.4	18923.4	1000	18719.4	16400.3	1000	20429.3	20302	18270.7	13671.2	1000	19425.7	14035.7	1000	12154.8	1000	46647.6	20855.2	15683	44531.2	48015.8	53954	1000	55641.8	1000	13423.9	48051.6	1000	41511.3	52314.9	42176.5	44842.5
120.537@1.92	1000	1000	1000	1000	1000	1000	1000	1000	1000	1000	1000	1000	1000	1000	1000	1000	13539.5	1000	16189.2	1000	1000	10378.8	10550.2	10994.9	12333.3	12628.5	1000	1000	1000	1000	15162.5	17454.1	1000	1000	1000	1000	1000	18383.8	1000	20884.9	12661.4	1000	35106.3	1000	1000	33719.3	19041.6	21221.8	16870.4
120.981@5	47863.9	46537.1	423404	515162	431995	488283	47624	534059	430994	548406	34883.1	55568.6	547544	565622	48973.4	615258	50533	562579	52590.3	57950.6	60751.2	57337.6	539514	47924	588406	485355	586105	530812	65095.5	51310.5	65082.1	60569.4	611820	477450	39213.4	51375.7	29464.2	49427.8	503771	60536.7	438142	514208	450943	517607	52358.1	54545.8	57047	22702.9	534002
120.981@4.81	53493.3	44763	22074.8	50804.7	30964.5	38561.3	501545	49571.2	47983.4	57764.7	449786	54259.6	64784.5	62437.2	57890.4	58319.5	54119.5	59596.2	503636	42659.9	57907.3	56713.9	46498.7	434259	57440.7	53431.8	55011.2	61035.5	38948.2	496702	75011	539782	29776.9	44159.8	362544	52624.7	398791	50368.9	48191.1	51332	56817.4	44454.9	53973.5	52819.5	53580.4	546400	60031.1	474762	58380.7
120.981@1.06	51021.4	44243.4	45703.9	41767.9	44440.2	40559.6	38888.9	47678.3	44344.2	36315.7	38074.1	38004.7	35225.3	36365.5	36589.2	47363.7	39455.9	35919.6	49295.8	32256.6	33262.8	35600.5	38096.2	33103.6	36876.8	49133	78287.3	41021.6	42121	51208.7	39793.9	39039	40693.5	48151.2	55131.3	58747	57049.7	48601.3	86601.7	45775.2	48535.4	46880.9	41027.3	48315.9	45483.5	43912.2	38789.3	42790.6	38249.4
121.03@3.53	15925	1000	24881.4	17620.7	10712.4	1000	20133.9	20213	12858.2	15296.6	11668.9	17457.1	19739.9	20308.1	23319.3	31302.2	54523.4	52416.6	46875.5	79648.4	49784.2	60655.4	50798.8	56196	52965.1	68968.4	52918.2	54057	46918.6	55555.8	52761	58808.5	59439.7	16004.8	1000	1000	12519.7	1000	11933.8	1000	14859.4	17730.1	1000	13260.2	12160.1	14558.2	17705.6	15413.3	1000
121.032@0.31	1000	18207.6	12911.1	92162.6	44324.9	176470	28427	14933.3	53580.3	33442.8	27609.6	1000	48501.7	64368.5	24740	37703.6	27806.6	10906.6	44129.6	14988.5	27656.5	40824.6	63583.7	68063.3	19024.6	30731.2	80202.5	14938.8	64219.7	25901.6	40081.7	50699.1	53599.4	1000	1000	1000	66037.8	148671	196362	35680.7	12340.7	1000	12191.2	10691.8	40477.7	40194.5	17571.8	11863.5	38483.2
121.037@0.19	18784.7	25423.1	28109.2	18004.4	24158.5	13472.8	21556.8	23530.2	26034.1	30586.8	33572.8	35084.3	22358.3	12898.3	57637	21235.7	17945.3	64522.5	1000	15641.3	36560	85677.4	29495.1	1000	20611.4	37038.5	1000	18897.4	30717.3	45191.8	10110.6	10509.4	10604	14006.2	11010.1	17601.5	13256.8	13774.1	18825.6	14906.7	22797.1	14673	21155.5	52698.8	23801.1	25181.7	1000	25659.6	13568.3
121.062@0.2	11176.9	30051.7	17978	83431.5	58828.3	133955	57524.1	35521	44600.4	45113.6	38050.6	43262.4	66473.9	50559.4	33355.2	65906	44528.5	36259.8	68063.2	60183.4	35301.1	49262	63031.5	59159.3	56497.3	42253.5	45755.8	92101.4	82922.1	79528.8	81115.3	32836.8	98649	12191.5	10723.5	38615.1	60510.7	83039.5	79220	18022.1	29949.3	33545.3	34645.1	18362	42681.2	32015.6	29976.7	39407.6	38651
121.063@16.02	74465.9	88276.9	93018.1	374271	394071	332223	405450	470314	504911	485486	76460.1	502955	450164	136950	550994	141557	125523	492755	66974.9	494291	460766	119503	101738	142759	88785	122030	419013	85861.3	253195	316657	137347	539718	546719	90209.4	79240.1	97732	85254.2	93270.8	70545.9	73687.5	108575	99178.1	119546	103119	111019	132375	110913	98794.2	143365
121.065@1.56	50423.5	90393.7	92364.5	69847.8	83283.8	75930.8	81246.6	39907.3	83152.2	81855.1	87430.8	83286.3	57094	90511.3	51655.3	83524.4	86534.2	85159.2	78573.3	76701.2	75642.6	50010.2	12814.4	76291.3	88670	40888.8	71714.1	24182.7	16790.5	68143.9	24881.5	61752.6	68707	3844922	4.31006e+06	3.93255e+06	3.685e+06	4155628	3.96711e+06	3.71351e+06	4.14107e+06	3.98079e+06	3.47806e+06	4083514	3.71307e+06	3141636	3.90863e+06	3.52853e+06	3.06102e+06
121.065@2.07	201810	185151	189738	186812	191162	80833.9	195820	182959	67313.8	218680	185722	182351	183940	180195	163734	172843	152594	164314	181497	161136	187101	178704	169300	158714	158177	160939	159203	146370	83475.9	147304	139542	163831	175277	9736001	9601661	8932188	10616786	10736555	9652029	10441191	10631911	9608576	10347966	10179892	9327845	10656259	10154873	9334617	10211410
121.065@2.18	212254	203528	185293	191489	206367	181990	208626	202103	191261	210421	213422	217450	193161	199409	96124.9	206441	192301	182771	180814	168568	67347.8	173518	177466	170400	185943	136910	178053	145902	156213	146530	168975	148436	187814	1000	273366	1000	1000	1000	213848	1000	1000	1000	1000	1000	1000	227722	1000	1000	1000
121.069@1.23	262179	254692	271699	247441	238456	240002	242778	213027	231555	217910	206215	222499	206743	193647	201463	200056	191666	187184	177710	180985	185584	150609	170666	181204	183579	183725	161845	173634	186192	166472	195453	203734	177275	203319	201216	254913	232384	240590	241724	231071	229467	235118	215606	226512	177894	202425	189677	220957	216984
121.084@5.28	2499357	5919744	3.77417e+06	2.9443e+06	3.57856e+06	3.25024e+06	2.97412e+06	3526069	3.50973e+06	4961419	4854813	5206093	2692285	4786237	3.34785e+06	2.28892e+06	2.91358e+06	4516947	2.78459e+06	4.3156e+06	4611751	4.23556e+06	4422016	2.85197e+06	2.33238e+06	2730410	2.76541e+06	4194502	4.21022e+06	2.85376e+06	4271249	3.03876e+06	4997925	5212927	5.31744e+06	4994795	7.22182e+06	4.79932e+06	5.09138e+06	5142137	7.97192e+06	5205688	4865176	4.9923e+06	5.10662e+06	3.99213e+06	5.09545e+06	4.9246e+06	4727581
122.019@1.06	135433	132890	129012	137454	131313	89229.5	124799	75603	114658	130159	124514	95200.1	131877	134518	110024	132303	130987	127949	131994	132327	127270	130463	104620	125457	135678	133745	126106	131423	215924	121944	215950	144408	150085	123475	128713	137291	98371.3	92143.8	107528	123281	118951	116419	121299	116189	116484	118635	121329	123821	120862
122.071@15.73	462937	434072	233604	463296	120276	312680	498797	649915	425315	645012	320416	354504	126268	3766816	266551	3.81e+06	648044	447200	326158	141200	502937	758475	206599	757430	390210	4.11703e+06	472090	546764	278988	419574	787236	280368	338201	433277	211252	133754	295468	268274	305164	525674	448538	3.52988e+06	326548	387757	234679	248628	207462	341031	744068
122.071@15.86	214834	238326	461225	568512	494242	749734	293458	127300	579246	279791	298668	258850	193410	731238	798112	737547	728174	336379	3.2468e+06	717442	378295	128759	212500	726396	805157	458033	918620	686797	542135	529370	364039	3.66746e+06	373275	419785	258149	278043	138121	396192	478834	693766	732622	699848	613018	754123	528557	705579	746127	523010	816595
122.071@15.98	2.97501e+06	2.74227e+06	2.73377e+06	3.22416e+06	3.29702e+06	3.48166e+06	3328955	3.33366e+06	3.48072e+06	3728672	395357	3.5672e+06	3.68622e+06	228780	3.91311e+06	632483	3.64958e+06	3.66645e+06	877193	3.65681e+06	3.73364e+06	566700	534415	715094	725158	205124	3971225	187610	3.77419e+06	4.06824e+06	3970762	303501	559103	2.6887e+06	2679688	2.9337e+06	3.33397e+06	3.37827e+06	3.28906e+06	3.24372e+06	2.17653e+06	248881	3.70441e+06	3.55904e+06	3559252	3.56921e+06	3.74953e+06	3532075	3895309
122.071@1.24	175686	163076	182015	206890	221381	225018	190280	212302	186633	186244	196692	191563	157696	169881	146895	135553	134343	113313	76323.8	89711.7	59021.6	49311.3	70600.6	59370.8	67334.1	62771.9	67596.4	55044.1	56703.8	59410.6	62132.3	68864.5	79964.8	115167	111632	117413	123810	143016	141752	129452	72595	135493	124277	123332	129566	118764	116834	119462	104552
122.072@0.21	793967	187354	746598	1537715	1.7048e+06	1.66717e+06	852176	736036	854407	819660	784185	828315	852270	952328	921804	776014	755598	909099	448876	813122	595153	940567	907574	815060	939431	928553	613871	888584	964211	733883	493208	535067	513851	283879	629360	701576	1.65203e+06	1.59707e+06	1.69002e+06	815863	650936	744591	761671	768925	809554	800694	966073	835032	929749
122.096@5.01	1000	1000	12003.5	1000	1000	14416.4	1000	1000	1000	1000	1000	1000	1000	1000	1000	1000	1000	1000	1000	1000	1000	1000	1000	1000	1000	1000	1000	1000	1000	1000	1000	1000	1000	1000	1000	1000	1000	10181.1	12146.5	1000	1000	1000	1000	1000	1000	1000	1000	1000	1000
122.547@13.53	29030.5	62240.6	47476.8	46713.6	79752.5	42330.6	42893.7	107972	1.23819e+06	106118	37063	79573.5	84305.6	56036.3	104566	38940.1	75229	94672.8	80574.4	109723	107737	106152	79569.7	91531.6	44533.5	50946.2	116552	66928.4	102596	115498	139319	120542	139479	25158.6	24310	47263	104205	20869.5	107071	12254.1	74627.6	43227.6	105923	85070.9	1427569	47912.7	109784	62304.7	106504
122.547@13.4	86235	1.29229e+06	1.02476e+06	89908.3	1.31578e+06	1.36381e+06	107632	42560.3	104662	1.43479e+06	118118	40029.2	1.45786e+06	69151.1	99407.1	1.50048e+06	1511402	120813	1.44382e+06	113681	94204.2	69346	94144.8	1.43422e+06	31343.1	76689.8	125967	1.66886e+06	134237	64865	105324	156999	132063	51114.7	23062.2	56972.6	33100.5	1.35146e+06	1.32406e+06	32038.4	94545.8	1.37161e+06	111875	24733.2	86481.7	115023	41027	116694	1.56167e+06
122.547@13.24	31759.4	104268	88194.7	57805.9	34627.9	35832.9	45963.3	82908.9	48994.8	120343	1.32606e+06	60552.7	127842	104205	132388	123195	102391	101826	101978	57967.7	120226	108035	114178	58671.8	128846	1.45184e+06	64567.8	117187	128844	106368	137432	117799	136386	64046.7	969345	63707.2	1.17795e+06	44764.7	122895	1393369	1.44433e+06	47550.6	1.43465e+06	59759.9	79189.4	1.46083e+06	73727	1.50012e+06	58417
122.547@13.1	107944	26211.4	44892.2	1154873	70167	87720.1	76312.4	1406597	104780	31511.4	115028	1434600	87230	83022.7	120747	88979.3	69561.6	60189.7	108864	73195.4	1432037	59964	94345.3	43989	125053	102593	100705	59332.2	126358	69183.3	139697	130459	45609.9	1.2584e+06	85330.8	1.33189e+06	94736.7	63732.4	78362.4	111372	86034	40003.2	108231	57437.6	94451.6	118570	1.44139e+06	97700.8	51808.1
122.547@12.97	55270	78531.8	80585.6	48460.5	48006.5	89666	81272.6	71210.4	90225	85997.9	55737	58716.7	115724	55828.6	107643	68360.8	50845.3	83149.3	103758	105220	100077	109462	65880	105382	115301	96603.3	107434	54174.1	118415	106612	129826	105895	131093	111714	95515.3	101491	53945.2	54921.5	57424.8	99004.9	98190.3	61004.9	61115.6	23526.4	37178.5	113110	105047	88728.7	102926
122.547@12.64	74540.9	27604.7	85362.4	98994.3	59845.9	95126	95908.2	98468.4	93236.4	113792	104405	90185.7	119304	103874	116269	100039	111494	102868	107589	80521.1	96450.8	58369.9	97081.8	93586.7	117700	104702	109779	107235	77513.1	126440	142657	111282	136627	50545.1	32805.1	76696.6	91663.8	41067	70600.8	50000.1	32513.5	91944.8	105236	80716.7	89401.3	93880	100852	115461	115587
122.547@12.76	65127	53278.3	62553	104601	94404.4	99401.8	62223.1	92304.9	55279.8	83999.1	102883	94631.2	117046	112268	109255	103500	114773	80618.8	68450.6	99833.7	98934.4	111641	109273	91327.7	88251.2	34318	92322.5	115780	118553	78093.6	141123	1.8168e+06	128668	104288	35250	73791.7	40265.8	95715.8	95747.2	20696.4	110784	69033.8	103703	21122.3	93520.1	102664	40540.6	84706.2	72304.2
122.925@1.13	96131.5	100959	103241	95717.9	100955	101161	94089.3	94865.2	98561.7	89268.7	105369	98505	94414	103898	98299.5	94712.1	92883.7	88700.1	91687.2	90569.5	94487.8	96690.1	103694	105165	117869	116496	119730	118362	126873	127543	116818	128883	126693	142061	141144	137773	140675	142010	143121	136924	140582	139254	138679	148357	140769	132792	139661	140511	143232
123.041@1.05	104303	104508	106941	95437.4	92688.9	91824.3	93411.9	98759.5	94534.3	85035.3	82762	90557.4	84630.1	88741.7	83402.2	80250.3	90494.2	87693	84940.9	76610.4	79377.9	82769.4	82274.7	83587.4	84551.2	81033.7	123404	89740	94991.4	95496.6	95066.1	76503.7	102641	148152	140262	147449	128818	137412	132935	81717.7	136686	135876	80208.2	131450	133559	132827	138127	137661	130037
123.044@2.59	118019	121751	108505	108506	101346	96119.7	99365.2	93641.2	97467.3	88415.4	88717.6	88332.1	51783.2	75658.9	70214.8	77869	76884.4	78995.9	77789.6	71627.6	75487.4	75775.1	65387.4	61710.3	65314.8	66315.4	60585.5	65871.6	66234.3	59557.6	61543.4	65529.5	62958.7	109188	123773	106743	88426.4	107168	104065	100945	93923.7	94696.4	86702.4	80376.5	90762.5	93342.1	91039.6	77619.7	82956.2
123.045@2.19	3486840	3.68204e+06	3.77279e+06	3.76528e+06	4.06848e+06	3430454	3.99791e+06	3.85862e+06	3.62088e+06	4068044	3.95133e+06	3984622	3537660	3.49255e+06	3.4287e+06	3.43854e+06	3.44882e+06	3.11215e+06	2.81198e+06	3.22565e+06	3.23832e+06	2.74551e+06	3177948	3115223	3.24867e+06	3204872	3.24117e+06	2961976	2945517	2813551	2.4691e+06	2.80672e+06	2.99337e+06	4.52687e+06	4.63904e+06	4.67777e+06	4497399	4.64186e+06	4664907	4.41744e+06	4.50205e+06	4500966	4296699	4.31849e+06	4292768	4144803	4.14607e+06	4.08249e+06	3.88385e+06
123.05@1.89	480232	930383	1.0179e+06	367150	1094881	840120	321950	967425	816071	394253	1000	996667	469194	20774.8	41226.3	35133.4	861643	40925.6	406770	245596	256151	420287	37751.8	246199	39858.8	310412	41706.7	349105	272933	39489.2	459142	487152	469449	334906	215375	1.07652e+06	662306	1021013	90189.4	311463	1.154e+06	1.18431e+06	290198	1.09786e+06	1035189	262130	1000	931380	258259
123.055@1.55	1.19821e+06	1.22916e+06	1.27781e+06	1.13073e+06	1.2614e+06	1.299e+06	1.13906e+06	1245723	1.24374e+06	1.09402e+06	1.16184e+06	1.17384e+06	1.07719e+06	1.15395e+06	1.10895e+06	990147	1.06695e+06	1045344	955421	1.04108e+06	1.0323e+06	989057	1.04726e+06	1.04882e+06	1.10164e+06	1.1007e+06	1184712	1149499	1.11923e+06	1.15414e+06	1.08507e+06	1.1443e+06	1.21761e+06	1.05866e+06	1.06197e+06	1.10478e+06	1.07312e+06	1.1333e+06	1.12895e+06	940456	1.15313e+06	1.00534e+06	939517	1.14304e+06	982659	906236	976022	970533	1.00174e+06
123.079@16.07	21863554	16887194	20949912	19368212	20510126	19027882	14261673	17464556	17170720	19056520	18561758	17793146	21452098	23755900	17069918	18987102	20689106	18243440	18875888	19519924	16288716	18295970	21693228	19350368	23842586	21104754	26686580	31708148	33672610	29224400	33047206	41983480	33162420	21706504	20899666	24070172	18026016	21605616	19415058	15336772	16096963	17422806	17084930	17972738	18264624	16742123	17944020	17151368	22141018
123.079@0.38	1945345	1212455	1.39753e+06	943994	2.01848e+06	1.5668e+06	1.2963e+06	983611	1.87998e+06	1.22296e+06	1.88185e+06	1.60143e+06	1.26273e+06	2.01365e+06	1382701	1.68201e+06	1.92177e+06	1.26707e+06	1.82308e+06	2.02285e+06	1.4846e+06	1185256	1619133	1502990	2162267	1.88006e+06	2.29852e+06	2742053	1.71295e+06	2.1569e+06	1.62009e+06	1.28555e+06	1.57562e+06	1.22594e+06	1.83411e+06	1.95579e+06	1192167	1.70703e+06	9605511	1.7625e+06	1108738	1.61654e+06	1.75625e+06	1.35212e+06	1568319	1.42731e+06	1793750	1.49467e+06	1.66466e+06
123.079@0.2	3142679	2698156	1.93731e+06	2932081	5.77836e+06	4558841	3.6695e+06	2.15225e+06	2.36367e+06	2395353	2.07102e+06	2.2396e+06	2.18457e+06	3.15126e+06	2.67417e+06	3.01481e+06	2.84011e+06	2.24519e+06	3.14047e+06	2.03647e+06	1.29468e+06	3.15257e+06	2249044	3920862	4.42139e+06	2355291	2.4613e+06	4.83825e+06	5405927	6823768	3.23927e+06	3.80203e+06	3.15144e+06	1224545	1.27173e+06	1.24033e+06	3.62958e+06	4415799	4.06336e+06	2.27823e+06	2.60259e+06	2676665	2809274	2.05832e+06	3481958	3.83875e+06	1569656	3.21154e+06	3.01955e+06
123.112@5.28	15197.7	1000	15352.8	1000	1000	1000	1000	1000	1000	1000	1000	1000	1000	1000	1000	12903.1	1000	1000	1000	1000	1000	15390.6	1000	1000	1000	1000	1000	1000	1000	1000	1000	1000	1000	47154.2	29224.4	49629.5	42726.7	31127.8	45504.7	34708.8	46258.8	48560.8	45948.3	38080.6	42205.2	35795.9	53303.8	39468.1	47443.8
124.048@2.19	79835.1	112002	116729	110980	135887	110244	130671	118781	114521	135577	127371	130692	114261	116488	111794	105703	115436	86616.5	110205	73966.4	100393	112849	99571.3	98673.2	103811	97158.4	101161	93353.8	90584.4	87893.2	101659	98456.6	119035	343457	367009	362729	322582	302974	336676	334625	330505	304322	291133	294288	292163	273500	277618	276111	257222
124.051@15.67	14937.2	18817.7	16796.3	14275.6	39822.9	51358.4	1000	34191	15485.8	104358	26831.9	36919.7	49912.5	66466.8	36447	195468	30178.5	32294.5	31183.2	25758.8	61114.3	48918.2	17153.5	53750.7	82397.6	82982.5	45603.3	31981.6	61614.5	18851.8	29082.2	58093.8	27011.8	1000	1000	20175.9	29161.2	63446.2	31889.6	35304.8	14462.6	21717.4	24657.2	50556	33557.2	53730.8	22632	59279.4	34663.1
124.051@15.87	57698.7	19161.3	30511	147914	19811.6	43918	17442.6	81156.7	38915.3	36957.5	48697.3	30359.8	47437.2	53194.5	46761	34269.5	25199	35363.7	251110	68836.1	47880.4	69354.8	81929	18180.3	56094.3	43226.9	27957.1	385982	49715.1	50801.6	20421.3	35130	43423.4	18388.5	18697.7	10472.2	48206.1	26898.6	31603.5	58659.6	213214	50576.8	352601	68716	61178	49616	55500.8	45298.6	251127
124.051@15.99	28263.2	50038.8	54415.1	32743.8	149894	207325	17769.9	42244.5	72394.6	112774	35093.5	181220	128702	263209	49853.7	84318	282190	139447	44010.3	362284	382406	279427	336123	329715	399895	188145	380669	57837.9	134535	419509	258994	61783.7	246821	21616.3	46184.4	80585.6	38390.5	44011.8	75963	21561.5	52159.1	252936	52521	325867	105777	294690	319519	41449.3	107182
124.051@0.17	78777	77748.9	77052.3	79195.6	87306.8	130755	58858.1	72487.3	64697.2	68679.6	72945.6	64242.1	100522	91598.6	45457.4	76619.8	76104.9	60605.5	90086.4	67398.7	97795.8	80088.2	117046	27154	29157.7	32131.9	29809.1	131134	106271	73537.6	36552.9	30377.8	84247.7	43040.5	47452.2	73133.7	152709	85506.1	76186.3	51975.6	75223.9	68271.9	59329.7	88314	43777	81647.4	86442.3	78099.1	70366.4
124.053@1.55	55234.2	77141.7	72740.6	62494	74372.9	66359.8	63868.7	74767.2	65837.7	58700.1	72226.4	59707.7	63144.2	59876.5	62726.2	58937.2	62094.4	58186.1	53276.2	63770.3	54080.8	59290.7	58128.8	58684.5	61295	66868	66928.5	65807.2	66655.4	67285.8	57141.6	69280.1	65299.2	177183	193480	190482	140264	151222	132826	92491.5	78932.2	71803.5	61224.2	58652.6	109320	60582.8	65801.9	79902.6	93192.1
124.087@16.04	201906160	198659980	169839330	126851896	91896200	156371940	148617300	152584290	122281240	151475900	130830504	147809620	154946800	160518220	156741060	125808264	139397000	150901260	141011540	141503780	146172450	157082270	157527940	153605800	151242350	141551920	153601650	151055650	88261400	178503630	134866480	71018180	164497340	56695950	169204930	151824260	59347676	159523120	159418860	147615620	119736630	155555900	152234380	149801490	151965730	150214420	155240450	152588050	156741520
124.087@15.32	8503260	12013446	8898510	16629116	4.23904e+06	7096687	6794611	3903545	30942780	8044181	17163362	4205757	12080372	4970709	9680437	35657416	10302922	12199384	8594159	6945813	14434717	6860540	4512798	12121194	15420946	7.92927e+06	7.01231e+06	7.83563e+06	12926601	9309724	25002942	5.22407e+06	9637606	6890649	11568595	7261206	14429291	8742471	6550470	8822229	39041980	5563318	10669477	4987247	9288112	4682001	4.68459e+06	4827269	9056477
124.087@15.43	2.65269e+06	13290559	9094574	2795027	10168025	8379613	8283936	8394438	9550266	15820088	5005927	8.17666e+06	5650303	3938849	9314904	15921519	9351222	15762273	16189081	15782828	19480986	15138927	6.01309e+06	7.07906e+06	4544466	7.92927e+06	13960256	11295392	46486790	7903761	5663872	15353276	9599337	6890649	12465324	7261206	43253824	9901854	7941436	9405549	6168244	14545933	15705090	4165750	17814978	11353700	11005427	2.72344e+06	5205077
124.087@15.59	23676142	5.21406e+06	14173942	15779442	63454692	10622732	12036688	10365774	4361482	14536216	11535417	8835471	15276106	22025824	7243077	7060059	12387722	13343836	4.11373e+06	17489424	19048296	11631137	9668344	6.92917e+06	6.71981e+06	11737851	5955344	9208052	14280175	10744777	22444060	10925162	20332602	4642138	4.65153e+06	17220012	53693370	9861212	14570893	4676088	9809879	22111740	18468640	20171624	8723545	6.41146e+06	13832054	14288031	6.53615e+06
124.087@15.14	18616620	3562496	17763614	3566865	5.31073e+06	7.78812e+06	6.44606e+06	3.30971e+06	11812726	8570659	20797908	1.89722e+06	3.20845e+06	11157906	8950973	6555745	3.29798e+06	6568618	7057520	7.72557e+06	5877094	5895533	6.66718e+06	6072059	4.65031e+06	3.91437e+06	8971061	2859260	5984248	7276934	6940250	12933284	6064184	4.57918e+06	7029583	13485887	5.35459e+06	8.21571e+06	6.66552e+06	8.32261e+06	4.7706e+06	8394353	3.70993e+06	8648077	4752374	4617460	9459457	5767510	5.95543e+06
124.087@15.7	26310238	10433594	18783350	11522296	2.63235e+06	12272946	16684776	15069488	17159364	7449411	16181414	7464539	6946105	15583257	24097136	9633508	5108670	8.24869e+06	2.74594e+06	21212516	6958716	10774099	14097888	10270610	25789772	7478067	5955344	16081182	15117962	8257688	13051384	15739693	19508264	102863660	7156651	6.22531e+06	15149369	22273076	7680861	20196536	7.56162e+06	10720342	6.88284e+06	18890576	19698678	6.41146e+06	7.65216e+06	13270140	13987911
124.087@15.82	16761773	10678415	23487416	23725946	15618032	22575316	9325000	12034586	20494984	4461993	18692524	8396371	8077377	12174585	25417054	9062945	18490556	9146974	22376138	13764956	23213788	11680218	24739870	16799676	15831639	11403998	12830535	8432982	18683022	20271660	23937464	84456296	8473156	14468725	7156651	9654362	5.78655e+06	19175460	14572938	8886850	12848993	12871523	12165096	9105382	12806300	9341612	4.5062e+06	11814196	11221484
124.087@15	5418454	4.3636e+06	4258043	2.57326e+06	1.66464e+06	3.40828e+06	5.91458e+06	2.57232e+06	5235593	3.76709e+06	3.6303e+06	4.28605e+06	2106041	4814183	5.32495e+06	6.4704e+06	11589674	4997584	3.18266e+06	6.23815e+06	5647015	3.85934e+06	7.68675e+06	3.94107e+06	2.13524e+06	11030225	5.32975e+06	1771137	2974760	5972677	4012236	2.25683e+06	2.61962e+06	3074367	1.64912e+06	2664225	1.74109e+06	2.06813e+06	4.61795e+06	5521321	3463996	4.53362e+06	2608951	3490151	4348678	5962769	6.76292e+06	5.8819e+06	5312512
124.087@14.86	5.76374e+06	2.64628e+06	5.16105e+06	7.89099e+06	2.43584e+06	2293286	5463075	1.76766e+06	4129252	2748903	1451591	2694106	929771	2234189	1.4924e+06	2.1702e+06	2985208	2762983	3.63468e+06	4.73297e+06	2614475	781665	4.58855e+06	1.5331e+06	4.72026e+06	1815450	1.70329e+06	2754451	1.63122e+06	1675428	3.7085e+06	4.90604e+06	2344852	1.82373e+06	2.41293e+06	5.87857e+06	1.27055e+06	3035900	1.44049e+06	5.02519e+06	1.13635e+06	1.58118e+06	3.22271e+06	1681181	1.14607e+06	3.04568e+06	1.84801e+06	5128275	4.55647e+06
124.087@0.37	11967488	9760695	12838924	6.24187e+06	41353684	38422788	22468346	5.39109e+06	12513920	7233624	12383657	24001104	8075340	11647932	23554408	8858925	10988292	7.08187e+06	10919475	26852668	23083298	6890559	22863464	8597098	12705276	26060336	11814849	12538708	7.97522e+06	11531016	8.15501e+06	6524326	7.91375e+06	7566149	10459654	15191012	7328776	44329908	45501820	24614970	6.62659e+06	8993300	12361897	8764170	23708104	9521951	11212144	23753734	10598197
124.087@14.71	2.9186e+06	2.27344e+06	1472234	2.01898e+06	1.21607e+06	726628	940079	831878	1434278	2.02994e+06	1.20228e+06	1.1797e+06	1.74114e+06	2.98076e+06	2.02384e+06	1.26716e+06	2.09684e+06	2.63665e+06	1.85899e+06	573937	766599	2.33413e+06	721103	2.06603e+06	4633694	1.05653e+06	1313214	2.03161e+06	1.00941e+06	1.40489e+06	1.74436e+06	1.22801e+06	2.11488e+06	1.20351e+06	607304	1.59049e+06	1.58593e+06	515409	1299367	1.48634e+06	1.03045e+06	1.79241e+06	738086	1.51739e+06	1742918	2.56799e+06	970644	1.20861e+06	1.2988e+06
124.087@0.21	13011539	20188476	21448818	20779782	17771640	21068886	11780404	12174890	11608109	12882235	10752931	10769851	12886861	13992350	10099140	13926317	17126396	10298978	15409195	9188349	9812896	15946202	10513935	13200094	17585048	11505778	14412501	17789596	21617218	25593938	17920438	17345092	19412348	13708352	19071274	13272408	18449816	27001880	21589580	11701375	13823408	13328310	13806450	12923904	11864318	14763281	12033382	11844077	12952414
124.923@1.14	13368.2	11096	1000	10561.4	13743.1	10608.1	1000	1000	12431.5	1000	1000	1000	11719.8	14092.9	10309.5	1000	1000	11242	1000	1000	13144	1000	13941.6	11792.5	13394.5	14121.4	16792.8	10993	15760.8	12733.9	12162.6	15639.3	14023.6	18570.2	17098.9	15608	22621.7	15902.3	17945.2	14537.1	18726.6	18845.7	13530.4	13025.6	14090.4	17051.2	15951.7	14627.7	15357.3
124.938@1.26	1000	1000	1000	13792.1	1000	1000	10115	10959.4	1000	12372.9	11228.4	14573.4	15804.3	17896.1	16539.8	19749.6	18642.8	16095	22228.1	18827.8	15829.6	23766.6	21093.7	29587.5	24796.8	24259.7	26951.9	24549.9	22407.2	27172.8	22776.1	28794.4	23504.2	1000	1000	1000	1000	1000	1000	1000	1000	1000	1000	1000	1000	1000	1000	1000	13253.4
125.003@5.05	32921.1	497621	36542.1	42651.7	498006	426807	41207	32588.2	37700.4	30145.7	40552.6	40934.9	48316.2	582344	46822.9	50939.8	34272.7	45989.5	44029.3	15358.3	46570.3	50834.3	41719.3	44863.2	49465.5	41544.3	50177.2	35411.1	13490	35861.2	35401.3	43112.3	28812.9	1000	11782.1	33087.1	37827	39942.3	41944.9	43257.1	42488.3	38180.1	44557.2	486811	41389	46575.5	45538	42044.9	46157
125.003@4.81	18233.1	37374.1	40885.7	540321	43476.6	33532.8	520504	14012.5	483943	44149.3	515260	558456	49240.6	49101.3	44921.6	49490.6	557895	46076.3	36196.8	46832.1	595024	51044.4	48396.8	527322	628661	48181.8	43143.7	504256	41115.6	40000.4	43512	46642.4	530948	46364.4	40423	516603	40877.3	41642.2	29831.9	26132.4	10053.3	43878.5	17682.2	45677.8	46828.1	561794	575679	515315	43975.5
125.003@4.94	21105.9	43427.7	41896.8	21330.4	34384.1	41269.9	43722.2	43407.1	29770.8	569672	40970.9	28344.4	589488	45581.1	50780.6	45178.6	46629.7	47781.3	28027.7	50013.9	16497.5	44935.3	44620.7	46251.1	46915.1	33249.2	47402.9	13001.6	39597.4	42609.8	46456.5	472952	44395.7	390334	465300	22046.4	468668	45819.8	45041	522094	453515	43001.2	43263.3	47331.2	43384.5	48314.4	47104	47403.9	37476.9
125.003@4.63	43781.8	30050.9	23763.5	26559.5	11616.7	38057.4	43262.1	45460.5	35826.5	17600.9	38239.3	38279.5	44690.2	48886.3	43818.5	624292	42667.8	45751	49436.9	596251	42039.3	608071	589366	43449.6	51110.5	49677	40981	37854.6	518457	43949	571303	42989	41964	32675.4	41172.1	33378.6	37963.9	42322.1	43349.6	41728.3	39578.1	46459.8	470501	44758.7	449698	45777.4	50811.6	36889.4	47052.4
125.037@1.05	10662.1	10410.6	12163.5	1000	1000	1000	10370.6	11729.2	1000	10107.6	10596.9	1000	11517.4	12251.3	1000	1000	11144.9	1000	1000	1000	10135.3	1000	11600.8	10487.5	1000	1000	16374	10013	1000	12299.8	11154.4	1000	1000	16911.2	17751.9	18426.1	15207.5	14786.7	15907.9	12852.2	16019.5	15389.7	11636.6	13229.1	17385.4	12147.4	17707.6	15573.6	12124.4
125.038@0.41	1000	1000	1000	1000	1000	1000	1000	1000	1000	1000	1000	1000	1000	1000	1000	1000	1000	1000	1000	1000	1000	1000	1000	1000	1000	1000	1000	1000	1000	10622	10786.6	11220.5	1000	1000	1000	1000	1000	1000	1000	1000	1000	1000	1000	1000	1000	1000	1000	1000	1000
125.09@0.37	995148	744051	864668	415670	835626	672337	611681	354739	967468	488474	835620	710321	546301	954381	691639	626676	771289	475639	845689	919742	664194	464996	610113	571104	896802	743093	894775	924222	519619	823364	555015	434849	523746	515588	778373	1.20194e+06	493554	713202	693644	911959	455243	599079	859271	583199	705091	643666	823833	658074	759931
125.986@1.06	850262	771582	779570	750782	753661	726585	626698	817110	592182	640463	611191	596257	536395	579586	567797	733373	555347	607973	708508	509649	560425	561448	618438	543621	566392	759184	1.34196e+06	558743	624381	713786	605769	532808	621907	903139	883357	1.03531e+06	949426	883500	1.61925e+06	787913	843720	772046	630423	801372	767206	655474	716419	672459	673596
126.056@1.41	25727.1	16447.1	33367.2	36987.6	22908.8	1000	15219.3	23344.3	13318.6	1000	13791.1	11816.7	28233	1000	14990.1	1000	15344	22440.3	18604.6	11316.4	17927.1	15782.4	13914.7	20121.4	15363.5	10328.4	15358.2	19558.5	22087.5	19161.6	1000	19395.6	20552.1	28663.3	60136.4	33954	49870.9	45908.2	52752.3	37583.2	46202.3	51545.7	37721.9	48434.4	43109.4	20119.8	45569.4	38902.2	34227.6
126.063@1.54	36032.2	1000	14953.5	1000	1000	1000	17165.2	11033.4	1000	1000	32615.6	32666.1	34213.7	33162.4	23538.4	27774	31126.7	34504.4	30241.8	46835.7	36089.5	43205.2	43285.2	45308.5	47560.2	49114.5	52976.1	44760.2	44753	43339.7	37081.3	47206.3	45057.8	140761	230987	146479	126260	139595	137527	139719	149425	135515	146677	160478	157605	153256	262439	159330	166392
126.061@2.11	27017.3	1000	17089.7	14273.2	1000	1000	1000	1000	10368.7	1000	1000	1000	1000	1000	1000	1000	1000	1000	1000	1000	1000	1000	1000	1000	1000	1000	1000	1000	1000	1000	1000	1000	1000	85888.7	134588	73160.9	82899.4	85320.7	78161	74115.4	79290.3	73385.8	83595.6	84347.1	73493.6	90544.9	94192.2	80061.5	91408
126.066@16.09	30499.1	24581.5	77322.9	16131.8	13648.7	16613.8	13519.9	69990.4	43870.9	43221.1	40694.5	35321.3	18732.2	19031.4	32644.6	15092.6	63416.4	15193.4	13893.5	92910.3	24117.8	21798.1	43120.4	23037.5	36931.6	16314.5	1000	29804.8	30640.6	24500.1	34284.8	74461.9	1000	46896.8	67185.4	22482	50771.7	40195.5	15022.8	16583.3	16278.2	13775.8	17887.9	15269.8	67985.2	25001.9	38329.1	55827.3	20041.6
126.066@15.98	231156	29004.5	209442	13686.5	28548.1	29820	34151.7	238496	152108	46422.4	399225	209061	63829.6	393399	346268	37163.2	449649	40150.1	17355.6	68715.5	224204	495722	143774	37102.6	24471	303239	74755.4	86853.9	365030	305221	78999.3	341727	32517.6	1000	37785.5	35025.5	42302	32501.4	33831.5	351450	102756	272373	427286	23612.4	61539	369827	354712	80601	323095
126.066@15.51	1000	1000	20477	1000	19928.6	14709.2	19442.9	18329.7	1000	56813.2	67813.2	21658.2	45554.1	23513.1	27215.2	34096.6	32329.3	72027.9	65038.8	74725.7	66860.4	37266.3	27702.6	389297	122636	225841	36723.2	77426.1	51260.8	118041	414188	18660.2	259593	1000	1000	1000	26153.7	36269.5	34319.9	45114.5	26126.4	68597.2	19070.8	62086.9	33197	22897.9	25047.8	82536.9	40435.5
126.066@15.61	14052.1	1000	1000	33937.4	37442.5	34510.7	18552.1	13942.2	41256.2	31182.8	26880.7	19542.3	57641.6	87880.9	51107.3	34096.6	26321.3	19673.5	23947.9	52029.1	27529.3	57797.7	44618.7	96141.5	331385	42498	71634.9	66255.6	24905.1	48675.4	24307.6	63489.8	72661.4	1000	1000	1000	44186.4	35352.1	49567.9	21680.5	10820.3	51178.1	61903.9	43610.6	60526.4	81696.4	45583.4	25016	86653.4
126.066@15.74	1000	16443.2	1000	20142.7	34898.7	46122	57711.1	29079.4	26738.5	260453	66434.4	30699	37193.1	105752	15940.3	272046	26321.3	48282.2	189219	65692.3	30108.2	43990.7	229853	94541.1	78280.2	40439.1	57423.1	456062	39724.1	64415	35541.3	29466.7	23118.1	1000	1000	25530.6	78255.4	40122.2	33610.4	40357.1	63226.4	42487	75813.9	374985	37436.5	48862.2	57602.2	93236.9	33038.7
126.066@15.87	30883.4	14166.2	1000	26528.5	21975.1	50527.6	50103.2	33889.6	44898.7	42486.8	64745.9	72325.8	16021.6	25066.9	38307	49070.5	16055.6	292216	52459.1	44271.3	89465	94432.6	18942.7	57822.8	72126.3	32837.3	312312	90635.1	81084.5	99514.4	52545.9	45478.3	53502.5	1000	1000	1000	22381.7	18559.3	77671.3	22814.5	34221.7	52173	94362.2	80453.8	54544.2	46809	68446	88008.5	47320.1
126.071@0.17	227899	214348	223672	221490	251316	258459	136455	160405	162465	188853	181845	162143	204081	220239	175647	171408	173987	208472	187762	106936	207331	144790	187436	58617	117376	55107.8	66757.6	217825	194330	143591	75625.1	62607.2	84600.4	127535	109252	190420	224291	250134	256369	132069	160305	93971.3	148279	174145	175504	165705	188698	191969	210204
126.101@15.99	386397	797653	125285	395797	359255	1.58506e+06	344997	270340	173882	178290	3.88271e+06	166454	681329	187443	404051	525131	3.94754e+06	394322	884624	134384	326649	742845	334640	489929	417711	595200	264934	176639	588332	293578	670493	257351	318995	212820	129451	123351	122651	412074	259030	137481	2054635	264852	3.96947e+06	29944.5	428758	3.76997e+06	3.91633e+06	382308	669726
126.102@15.85	212680	147467	438428	327256	150745	258317	294017	295406	269258	403700	459404	272392	751250	192159	699228	636691	258497	348738	1.09314e+06	1717196	576369	543713	152353	270625	837697	915016	3.26074e+06	4765492	707997	1.03055e+06	2.43839e+06	413690	452158	127653	104000	137231	228056	323780	2562147	3.25773e+06	244744	433841	336170	4051935	190589	385531	706414	585265	2896429
126.102@15.63	164651	138331	436460	2.19511e+06	2601983	140070	393876	209078	2.01615e+06	3.95871e+06	686990	467698	2.04308e+06	2.75079e+06	3751847	4.08914e+06	214936	382222	879571	567762	323712	733190	2.25458e+06	329142	2.38117e+06	981256	128350	499666	277378	1.8456e+06	247727	288162	1.09063e+06	632055	96244.1	412345	273104	1.2713e+06	221927	373981	362645	2.23573e+06	215026	307595	494031	126051	712688	505029	357162
126.102@15.46	241548	222197	161155	127129	183155	1.05215e+06	198945	407623	339804	578000	297375	370975	255843	591734	809182	464440	233456	758285	2.1747e+06	809705	569001	620782	136197	293507	2.46982e+06	2.42789e+06	442453	959236	430641	2.00078e+06	1.05653e+06	341963	208162	637828	690263	197548	144042	1.18336e+06	526170	388515	1.28063e+06	196943	545338	463985	1.48857e+06	429132	306356	673391	311543
126.102@15.75	116327	72498.9	136117	176293	150745	332935	474860	284782	330889	757092	543809	709159	164186	160131	433485	400575	474446	753948	694201	145053	751455	284906	152353	270625	494714	467509	648085	656238	959777	383142	425249	573958	338225	71740.8	262881	122132	140995	599023	372663	368228	601295	228761	512747	168186	180800	180877	415416	535495	309840
126.103@15.25	249731	190588	469430	137989	282643	69728.2	183285	134376	153818	290940	211484	301241	99576	1.23941e+06	291466	369858	272319	734509	278798	73316.6	237243	470832	270584	164965	133183	321509	1479806	210059	324822	357276	247637	157906	455041	79585.4	80784.8	97220.6	125921	337350	97517.2	104701	290126	282137	298026	167636	334867	230512	89917.7	274085	163251
126.103@0.19	285227	230537	286512	411285	978908	326100	617025	447344	424482	228175	654095	485824	538639	238832	486233	366754	270812	822634	358325	695545	528161	560333	540477	640608	354656	536800	485667	120305	452696	241766	166516	395802	441901	124934	70229.9	235599	423116	853881	274137	608438	231088	276200	248938	199931	301856	306693	234137	642126	222474
126.97@0.45	55654.4	49863.8	95796.7	75391	43085.1	36778	11329.7	77533.7	38588.3	72076.9	76292.2	72502.4	82794.5	58094.7	68156.9	79548.8	78742.6	1000	41394.8	79577.5	44693	65289.4	66172.9	72987.8	73597.4	74101.1	69440.6	74702.2	66671.4	65171.4	76017.7	69344.8	76886.5	42068.1	85207.8	14755.8	94536.4	76343.5	35564.5	36294.1	31161.6	39182.4	78113.8	67845.8	1000	1000	40574.4	33807.2	33141.9
127.016@11.61	1000	1000	1000	1000	1000	1000	1000	1000	1000	1000	1000	1000	1000	1000	11743.1	10916	11174.6	12165.5	15452.3	15172.3	14678.7	15371.1	15849.5	19211.4	20068	20389.9	23952.5	23880.8	23049	26171.1	27556	27301.4	32486.6	1000	1000	1000	1000	1000	1000	1000	1000	1000	1000	1000	1000	1000	1000	1000	11615.7
127.039@1.28	400920	391257	357510	348700	442064	420285	349347	362227	342422	290932	291788	312398	218819	260652	224464	189570	199889	245085	155606	157189	158536	133717	131670	104162	109441	131054	125258	114812	109382	107751	103187	147028	113253	494395	478822	475208	341638	414922	497688	331380	403826	437799	390428	514084	382793	350938	287517	355338	307366
127.041@1.47	143422	155929	98741.6	140420	144475	136617	61056	37714.1	109697	93035.1	103548	102477	82163.4	79969.3	89956	25896.3	26122.3	31845.5	36640.7	32546.6	33985.6	41038.3	41012.2	42307.4	43489.7	43657	44072.8	43518.3	43036.3	39097.4	40254.3	40577	41065.2	175090	119731	174602	170899	163852	80245.9	135306	74396.1	119205	140815	159223	142480	121115	135377	131570	108191
127.041@5.77	53406.7	48240.8	46502.6	23760.2	14125.3	30975.4	26169.9	28108.3	23682.8	23443.8	19083.7	21535.1	17371.5	1000	16951.3	13637.9	21720.8	1000	22773.6	14261.9	12685.5	14261	15542.4	20480.2	1000	23951.2	1000	30059.8	13935.8	27837.4	11275.3	28941.3	1000	37658.5	40400.3	45950.9	32690.8	36764.2	37626.8	21090.4	17371.2	27095.9	20791.5	13214.7	16053.8	18136.8	22128.3	17623.2	13952.6
127.043@5.95	50469.4	45404.9	33358.9	14397.7	25586.7	15003.9	26083.7	17200.5	10640.2	22106.2	1000	18244.9	14889.2	15720.4	12936.1	16178.4	1000	19038.1	1000	23205.7	23036.9	18956	19855.4	1000	20332.3	12663.8	28181.6	25752.7	27909.2	10614.8	28042.5	11854.4	32813.2	40512.4	46463.8	38139.8	24819.3	32823.6	33532	27889.3	28511.3	27921.6	19321.3	23883.5	10612.8	25338.6	26441.4	1000	24658.8
127.043@6.49	24518.8	38392.4	35433.2	20945.3	23817.1	22721	20328.5	20888.6	1000	17311	17375.6	13174.3	1000	1000	1000	1000	12060.4	1000	10649	1000	11467.7	13612.4	11980.4	11713.5	37625.6	36737.6	41019.1	79957.4	78876.5	80418	115242	85625.7	116667	55958	53622	55595	35588.2	38252.5	41110.4	24943.4	20387.2	24953.2	1000	22524.9	21288.9	13864.8	21134.3	18040.5	16797.6
127.067@0.16	362690	299980	325439	255014	238517	263277	262715	294722	254323	270396	244290	213150	296434	274787	292349	243518	120308	285590	234970	166334	143711	150130	239627	146779	138432	95633.9	168982	154827	248376	262538	112763	103301	173757	183137	157533	263835	273757	226583	251712	252565	120352	253435	226417	248960	116146	247051	263236	271791	243422
127.07@0.35	17088.4	19584.2	15325.5	54313.8	29492.1	20709.9	14071.3	25626.1	39675.5	26381.8	19690.3	22058.2	39515.5	11973.9	32664.9	18263.1	18143.3	58517.9	19455.6	18598.4	21037	24050.6	33687.8	20993.7	12240.9	15334.9	10883.1	21999.2	45836.1	25305.6	23085.2	31496	47640.9	20561.9	1000	12048.3	32225.3	13596.4	46305	37710.1	22787.3	26732.7	11813.1	17246.9	24621.1	23430.5	22628.3	15107.8	14232.5
128.02@1.06	1.85833e+06	1.9612e+06	1.96409e+06	1.89998e+06	2.00463e+06	1938713	1.94706e+06	2.04155e+06	1.91585e+06	1958801	1.91745e+06	1.9268e+06	1.90549e+06	1.93982e+06	2.02272e+06	1.87269e+06	1.99658e+06	1.9112e+06	1.88048e+06	1.9265e+06	1984850	1.88503e+06	2.15265e+06	1.93426e+06	2.05784e+06	2.01471e+06	3.02034e+06	2.07025e+06	2.19968e+06	2.20171e+06	2.11506e+06	2.1999e+06	2.34939e+06	3121881	3.1615e+06	3126542	3.08234e+06	3.1603e+06	3.03721e+06	3116678	3.28033e+06	3.16023e+06	3134501	3.24733e+06	3.15707e+06	3.21608e+06	3.31197e+06	3.19905e+06	3.21297e+06
128.058@0.17	715476	595121	740970	564295	541323	593868	613253	634910	577217	607608	614268	504800	628992	597660	499012	565915	279698	628208	159794	372201	310931	347940	482971	355120	154520	299507	263855	625046	627672	469320	233245	227882	601892	441242	324619	551675	592799	550172	542567	547777	335667	350481	517548	535890	313174	630062	566549	607310	589384
128.071@1.29	449558	373071	308726	224785	203838	247763	209757	241910	226647	226447	212826	238459	212038	223378	354039	180170	457602	49366.3	428959	197620	443640	109861	50094.7	48308.5	43842.4	44870.2	188372	462401	473640	184615	58536.1	44394	59814.1	386449	481105	313642	268500	366406	272605	252969	285248	446014	343041	398598	531464	405920	420636	288368	360183
128.08@1.47	65377.7	115818	98442	69743.8	42497.5	114644	94285.1	120095	69157.8	69538.7	134517	128506	129401	260328	138278	221419	143236	469381	133184	334034	131648	491493	484135	426405	495829	464871	292811	127801	71045.9	272534	495604	551217	435072	126381	120002	24130.5	119011	21397.7	120014	20509.9	21732.8	129576	131622	21360.5	24282.3	26207.5	29513.6	30777.2	31157.9
128.082@15.39	1000	1000	1000	15694.7	1000	1000	14578.7	1000	39833.5	17962.9	14857.2	1000	30289.5	14590.8	70614	33288.9	31528.7	128303	59187.8	23945.7	13703.6	15908.2	14743.2	35038.3	112456	44733.6	105159	59827.6	48388.3	33259.7	27764.1	19224.4	63671	1000	1000	1000	1000	16664.4	12411.6	10655.9	17144	12746.8	33386.4	31307.1	33562.8	14811.8	22990.8	46097.8	47488.8
128.082@15.53	1000	1000	1000	11797.6	10885.7	12024.3	12844.3	11212.5	11979.8	23881.9	29040.3	107269	62788.2	12699.7	38544.7	77581.9	37927.9	19380.4	193239	23945.7	61348.4	42788.8	21906.6	47223.3	24924.1	107893	20457.4	72095.2	204287	39572.9	202817	45354.4	74278.1	1000	1000	1000	1000	16664.4	1000	11631.6	12379.1	1000	56170.9	13793	28014.3	19512.7	54482.3	24869.8	72963.4
128.082@15.71	1000	1000	1000	24440.6	1000	1000	40227.9	42226.3	61837.3	53445.7	53010.2	102703	26821.5	106776	47771.5	20353.7	27902.7	39234	29851.2	15015.5	29213.2	25684.4	230486	48403.9	35643.7	44804.4	57296.4	464439	61100.6	178873	19073.9	134654	24412.8	1000	1000	1000	1000	20266.1	1000	41666.7	25662.4	33883	39739.9	25816.7	53709	34608.8	20625.4	39237.6	88029.1
128.082@15.87	1000	1000	1000	1000	1000	15613.9	60049.8	54037.5	23103.2	57088.6	61598.7	14229.5	110722	42430.6	40367.1	98762.4	16117.5	99060.8	122907	37228.5	44932.6	81040.8	77671.7	87755.4	22881.7	97274.9	40813.4	79730.7	92968.8	39825.7	72048.7	45846.9	24245.8	1000	1000	1000	1000	10392.8	22287.7	49134.1	24339.7	47011	46639.2	31568.5	59915.2	33796.8	36213.2	24363.2	29173.7
128.082@14.59	1000	1000	1000	1000	1000	1000	1000	1000	1000	1000	1000	1000	1000	57966.8	28516.9	12327	1000	16926.3	1000	1000	13365.2	13033.6	12498.5	12313.8	24076.9	38586.6	1000	1000	1000	1000	17658.5	1000	11482	1000	1000	1000	1000	1000	1000	1000	1000	1000	13351.6	1000	10575.8	16832.4	22502.8	1000	1000
128.109@0.33	158876	160841	106028	300340	95070.3	67775.9	149936	141044	124548	48722.1	189626	195068	114391	201959	72374.5	168400	38221.4	171990	195528	151404	196070	165778	180545	52187.2	198870	192904	146684	132920	110604	75888.7	42150.1	57849	32349.8	117096	56625.8	75585	41426.5	83714.5	164250	69900.8	180957	174802	117545	181244	176913	186600	123739	223000	166363
128.109@14.92	61719.4	79494.8	71107.5	108203	70251.4	76193.8	95851.3	32243	97838.2	39491.9	75207.7	92052	82284.9	120178	111028	98761.1	98643.7	527375	49754.4	100491	57430.3	83399.8	109334	111547	111120	43266.2	92444.9	58177.9	77567.2	41341.6	54797.9	41604.9	82734.5	92684.8	70302.3	21832.5	57528	120013	60931.7	95783	102523	95937.2	97050	112750	103657	102128	94568	97411.6	91270
128.113@15.21	170036	58402.4	138150	76458.3	156547	194307	75387.6	80165.2	181156	116910	114438	195065	131910	216982	206070	217879	203396	284917	84678.9	169828	86999.2	93428.7	533129	127021	162046	160546	130684	83540	204466	101347	532910	159073	283004	36626.8	88738	120938	103187	173630	173519	63416.6	160928	194305	174783	222686	215557	128423	202400	216261	188412
128.114@0.2	296400	287559	74062.6	57853.4	83844.6	317081	118269	247678	340186	401304	445278	390731	447175	426486	463716	110739	90990.4	87844.6	362082	378582	390745	400382	406842	103911	354011	440969	438394	177219	359288	189365	86207.7	362834	383309	144384	261095	267704	345883	285848	87599.7	359585	360902	380568	323797	98038.6	400151	126968	375175	414941	398987
128.114@15.31	200036	77275.7	201205	251531	120307	179402	106958	129447	1.05591e+06	79384.8	104438	178302	175592	215724	118181	143226	67281	135085	155737	96425.7	155433	124849	170844	56813.7	240569	105133	874167	221167	94514.6	42004	139552	146164	713335	78350.7	154405	192788	122039	149650	129654	152613	109050	206945	283717	131139	1.20073e+06	80325.1	159550	84347.8	836382
128.114@15.47	64079.8	72899.6	127663	104399	222010	239847	54005	60376.4	234045	1.05214e+06	100854	127203	168992	91522.2	176517	261479	221941	678532	1.18257e+06	946810	287381	271814	172286	232450	1.18927e+06	1.30092e+06	177178	346879	425490	1.02981e+06	303196	121185	102531	224872	34582.7	79700.3	225172	128228	265856	200010	101095	121699	132446	305774	111697	166132	196113	1.16993e+06	179920
128.115@15.61	1.44389e+06	130224	84415.1	117461	1.91545e+06	173947	98139.4	84243.2	218650	124206	48782.8	149098	199654	68988.2	291474	81002.7	201271	111020	214649	265844	153433	269702	202238	112935	341504	493268	72587.5	246262	219705	250569	108572	113490	144886	212437	64002.2	223951	219603	104256	120245	244298	198809	1.60751e+06	160524	120943	160837	169762	117848	266028	271406
128.115@15.83	141986	192737	169475	273726	103401	173815	272269	216262	258179	337423	277184	229878	1.79747e+06	211853	236192	2.09019e+06	156477	356115	874701	104043	92440.1	213123	342622	97556.2	340418	336213	269675	142372	177979	151467	1.60479e+06	102512	124063	1.43469e+06	1.2438e+06	122143	1.74819e+06	251531	254205	265330	195317	273685	300385	163367	174034	148474	142836	185635	277908
128.115@15.72	104491	114130	103651	45714.6	54589.9	93622.3	219294	299547	190199	475912	302800	319346	153708	195010	203750	299335	115093	209973	198841	173560	332620	182675	244063	244663	179454	203922	231325	142372	245592	845080	108572	1.57069e+06	158465	109871	133198	124638	271889	193574	266337	262594	260946	87521.3	73140.1	120943	169811	215487	207715	132114	754624
128.115@15.98	125415	1.37661e+06	1.43518e+06	213141	86249.9	108210	143455	119560	76874.5	94732.7	183083	319746	179724	82616.7	188563	153355	115828	121019	117624	113138	127484	391651	189038	253390	177903	298276	112522	59499.5	197601	297754	152211	151698	147050	81795.4	145223	1.52104e+06	116114	146053	157685	196919	154047	112425	99440.6	104773	207960	151959	36628.2	168656	314375
128.951@0.42	439102	73893.8	136792	305206	1.19813e+06	723127	335931	356031	326575	338385	332603	876630	344417	1.2031e+06	1.2103e+06	352746	345182	357700	1.14535e+06	326530	624101	301868	317534	677942	318030	342161	1.23038e+06	350184	371788	348709	340741	1.35964e+06	403592	1.4294e+06	1.00006e+06	1.35902e+06	341678	955707	736454	319107	354423	1.20703e+06	333456	320900	332042	728817	651430	730989	978845
128.971@0.48	27361.5	48290.2	44822.3	62661.4	31111.8	36156	66474.9	33762.5	36084.1	36028.2	36074.8	86241.1	62609.7	94040.1	24831.8	31856.2	35529.1	71957	55462.2	34743.7	61267.3	24402.8	53558.5	34914	34412.6	33311.3	51175	35612.6	37940.5	79131.4	31132.9	30260.3	33804.6	80218	117945	87875.3	79861.5	76954.9	31334.6	60965.4	36332.9	83149.3	54789.1	34023.2	83606.6	35568.2	60792.2	34663.2	36272
129.018@1.75	1000	1000	1000	1000	1000	1000	11565.4	1000	1000	18007.7	16154	1000	37729.3	47308.2	52088.8	65580.7	72366.4	78153.1	81569	91483.9	96405.6	90220.3	102829	102408	81410	88032.7	77673.1	73309.3	77104.9	69532.6	51813.4	53465.6	58671.6	60405.6	75602.1	48601.1	91415.2	107444	98672.2	100693	112409	102911	115431	130990	122702	135324	145663	136442	159545
129.018@1.96	1000	1000	1000	1000	1000	1000	1000	1000	1000	47104.2	53820.8	56748.4	122874	125007	134463	208066	204918	203468	261933	264978	266420	290482	283499	282451	236961	238450	225197	210292	211598	203754	181626	197459	200956	210187	233902	229253	268909	283783	250523	284749	297164	273956	311945	322116	302237	362156	373175	357800	414288
129.02@2.39	1000	1000	1000	1000	1000	1000	1000	1000	1000	1000	1000	1000	1000	1000	1000	1000	1000	1000	1000	1000	1000	1000	1000	1000	1000	1000	1000	1000	1000	10278.3	1000	10367.1	1000	1000	1000	1000	1000	1000	1000	1000	1000	1000	1000	1000	1000	1000	1000	1000	1000
129.021@16.13	13359	25898.1	61247.2	35679.8	54690.9	37570.5	39947.4	40944.8	42080.6	37925.9	21970.8	22211.7	81823.7	26060.3	17231.3	23898.7	45897.5	1000	1000	28164.7	40042.4	21965.2	36464.1	19315.7	16603.9	21777.5	37912.5	16645.6	14916.8	1000	16356.9	13930.7	1000	43534.9	102141	24526.2	51540.8	129379	78673.2	46535.8	52915.1	33685.8	39819.4	44814.1	91532.8	62991.7	77541.8	30223.1	94502.2
129.041@0.16	294078	238530	300677	205679	262161	221747	143619	313732	94018.1	298408	291182	270002	153719	335168	314606	288286	290211	56438	268281	102946	311320	292076	63913.7	86828	135007	71666.1	111129	311436	219283	260705	103760	101723	307951	175146	147778	237447	223873	214630	221118	71427.8	137117	293899	156136	226594	156417	162245	124538	153751	159961
129.052@4.73	58122.4	48926.9	54955.5	56167.6	49687.3	47387.7	37968.4	41799.4	55863.3	55850.7	56212.8	46238.2	55374.5	20463	51312.8	20280.5	47421.4	47799.2	34236.9	46895.4	56058.5	52941.5	30984.2	47606.7	53911	40832.7	30970.6	48849.3	48402.2	13737.3	26001.4	45583.6	43927.6	15014.2	21814.7	43255.2	29068.6	44940.4	46407.5	420067	46492	42418.7	360274	42550.1	43391.8	24733.6	42807.6	39461	43754.3
129.052@4.88	49101.7	51653.2	28166.4	49332.7	55293.5	46868	31133.2	51319.5	53171.8	45860.5	50016.7	47062.3	17623.3	51458.8	51262.1	56930.9	51234.1	55776.2	49872.7	54469	26372.7	53019.8	48402.8	52570.7	52516.4	56657.6	52129.9	40732.7	45234	49262.3	50773	34439.7	46818.2	409520	423004	46841.7	22815.8	38967.9	35689.3	48150.5	44574.3	41760	41356.9	409543	427790	51131.7	417880	50593.1	40089
129.052@5	51241.7	47731.8	48831.9	51311.9	46120.2	17987.9	50798.6	53198.5	44539.4	49559.1	51566.8	18313.6	17136	55687.1	50879.3	52039.3	38968.2	51712.4	56353.8	36738.8	52743.1	51841.3	47398.8	450231	50483.5	47395.2	23191	48698.5	38454	39680.5	50145.2	45098	44923.3	39822.2	41830.3	44358.1	399520	43809.3	417015	41134.1	44618.5	41650.8	41466.6	43647.5	43592.6	452520	27326.4	41880	26512.8
129.052@1.13	55872.7	64363.7	64461.2	37414.4	62465.2	41736.2	58848.3	39285.6	65534	62211.7	54121.6	54891.8	61379.9	54990.1	58320.5	52829.4	57534.7	51508.6	64206.4	55278.7	45893.2	62767.8	58543.4	46778.5	59904.7	47729.3	57657.1	38560.4	53130.4	35698.3	52762.6	57127.7	17002.4	56129.8	62020.9	67133.5	42953.1	54834.6	48413.4	48951.5	50455.8	62850.9	47292.5	44491.1	50741.4	55427	57462	56198.2	46952.6
129.065@1.56	1000	1000	1000	1000	1000	1000	1000	1000	1000	1000	1000	1000	1000	1000	1000	1000	1000	1000	1000	1000	1000	1000	1000	1000	1000	1000	1000	1000	1000	1000	1000	1000	1000	35514	74072.2	42060.8	69052.2	71097.4	36569.2	71673.5	73377.6	63515.2	65495.7	64924	60290.5	68258.4	62962.4	66987.6	71515
129.091@10.54	1000	1000	1000	1000	1000	1000	1000	1000	1000	1000	1000	1000	1000	12775.5	11770.4	13320	12633.9	13537.1	16451.8	14229.2	1000	15922.6	16375.3	14112.6	15330.1	15336.6	15720.2	12995.1	15514.2	15210	14278.8	10411.1	13364	1000	1000	1000	1000	1000	1000	1000	1000	10034.4	11309.9	1000	1000	13613.4	13700.2	14218.4	16652.2
129.1@1.56	1000	10464.9	19492.2	1000	1000	1000	1000	1000	1000	1000	1000	1000	1000	1000	1000	1000	1000	1000	1000	1000	1000	1000	1000	1000	1000	1000	1000	1000	1000	1000	1000	1000	1000	47137.9	55425	50818.1	45352	58512.5	51357.2	51112.6	58688.4	48678.6	43250.5	52031.7	42887	26048.6	61365	36903.7	12716.8
129.1@0.18	18056.9	1000	22706.8	1000	13415.2	1000	10522.7	26346.8	1000	24941.9	22658.6	20896.8	12082.7	24908.8	22366.2	23037.5	22559.7	29358.6	15461	18883.4	15466.8	16353.5	27858.4	12969.2	20186.2	17837.2	29856.7	1000	10957.6	18206.7	12707.9	1000	13662.8	13459.8	1000	14580.1	16912.7	20430.2	18462.9	18461	17266.9	30490.6	28221.5	35229.2	26964.2	24253.1	15080.3	28221.3	25321.8
129.102@1.09	184216	187720	186287	182864	195281	192553	192823	185769	169547	170714	170549	171920	155491	160745	150576	147807	143693	134376	133939	134673	136825	128589	134016	133619	136387	129372	139260	139435	130095	141457	129381	136849	132353	201462	189127	204589	199868	204776	196211	196317	197879	193821	181920	189458	179979	178981	180783	170085	167251
129.138@1.07	1000	1000	1000	1000	1000	1000	1000	1000	1000	12899.9	1000	1000	11198.7	10982.8	13773.8	13306.7	11332.6	12621.8	13712.5	16454.9	23886.1	64471.5	75279.1	78033.8	169609	170164	222653	272711	293538	291453	338942	369302	385126	64645.7	76140.2	61698.8	81209.2	89394.9	85547.3	72965.4	84276.8	75879.5	70149.5	84007.9	80475.5	81513	80227.6	82753.4	86439.7
129.139@1.24	40993.5	39491	32038.3	56838.5	62274.1	58965	65038.4	57843.3	53903.1	74471.2	59965.4	69432.2	105611	86565.2	99706.5	76947.5	83804.2	78970.2	167139	209349	184295	282546	277434	294917	251979	257585	261491	231303	239820	218556	244283	205737	208130	52823.2	59602.4	49402.3	49337.1	61075.8	60590.9	54316.5	61173.3	51292.9	57336.9	44759.1	65885.9	61583.8	74156.6	68006	77608.3
129.139@1.54	346501	775504	518456	430783	709780	876097	432802	852080	429578	448542	430178	455049	508736	745630	854638	577923	800949	891315	623961	508082	642285	448053	571645	467079	421140	350180	523731	407230	421331	280011	333936	314340	284288	131236	56610.6	496000	377875	398385	421560	392136	392148	393704	342172	290446	428283	339796	394135	444651	355535
129.139@1.88	90740.7	110702	123648	127138	112016	147251	137461	138924	147957	144284	152693	144623	125850	107841	131011	104670	112993	111016	78956.4	62834.7	90179.5	69223.7	78423.7	78616.1	16604.9	70068.1	39665.6	46323.3	57508.5	26030.1	42216	41840.6	44163	100798	108917	117658	89426.8	104801	130045	98187	126046	126797	95652.4	37675.2	107680	91586.9	110589	58479.8	46515.8
129.545@8.53	11076.7	1000	11762.5	10436.7	11463.6	14058.1	1000	10781.1	12470.7	10037.4	12598.3	10145.8	10097.3	10798.8	12418	1000	10693.8	11375.4	13114.1	1000	10748.2	1000	11596	1000	10104.2	10352.8	10802.6	12165.7	14398.7	12751.5	14847.4	15234	14087.7	1000	10979.9	10654.3	12392.7	12494.9	11086.3	11985.3	13007.9	10561.2	11645.2	11944.9	11659.6	1000	1000	1000	1000
129.979@1.06	18450.6	13296	14826.4	15168.5	15479.7	13285.8	11243.9	16579.7	12883.6	12899.6	12770.4	13608.2	11071.2	12864.9	11425.9	14629.7	12479.2	13215.2	15642.3	11579.7	12306.3	11523.8	12597.4	12535.5	10337.6	16747	27786.5	12645	11403.6	14073.8	11702.4	13834.7	12828.8	17484.1	17824.4	20768.4	16633.4	18130.9	34543.3	16890.2	15951.7	16026	11526.7	13236.1	15325.1	14233.3	16330.1	11771.2	15971.8
130.017@0.6	1000	1000	1000	1000	1000	1000	1000	1000	1000	1000	1000	1000	1000	1000	1000	1000	1000	1000	1000	1000	1000	1000	1000	1000	1000	1000	1000	1000	1000	1000	1000	1000	1000	1000	1000	1000	1000	1000	1000	1000	1000	1000	1000	1000	1000	1000	1000	1000	1000
130.05@1.23	13620137	13723387	13725921	11329793	11545130	11548012	8458837	8398160	8233334	5.12286e+06	5124580	5095138	3.46206e+06	3.49562e+06	3.44472e+06	2713542	2.73991e+06	2.69392e+06	2.22722e+06	2.29882e+06	2.30754e+06	1.94767e+06	2011208	2.00026e+06	1.97523e+06	1973735	2.04068e+06	2.0341e+06	1.98429e+06	2.01632e+06	2.01171e+06	1.92464e+06	2.01825e+06	11386659	11392468	11593533	9961564	9978198	9937868	8286095	8.26801e+06	8244381	6.50541e+06	6.62252e+06	6.36466e+06	4.95932e+06	5.03904e+06	4.76091e+06	4.18868e+06
130.05@1.93	490152	920063	510963	2.93107e+06	3.15095e+06	3124590	4.41803e+06	2418564	2.49324e+06	5.20019e+06	5323443	2730199	5475438	2.94875e+06	3.15888e+06	5429345	3210011	3.10356e+06	5342903	5495006	5629325	5.48989e+06	3.19925e+06	3013637	5.59611e+06	5.71108e+06	3.25015e+06	5.9803e+06	6.1043e+06	3.34785e+06	6006641	6.23859e+06	6.5028e+06	3.92915e+06	4.2285e+06	3.6753e+06	9010452	5.29442e+06	4.90046e+06	5.63264e+06	6.35689e+06	5894831	11671841	7.0669e+06	6776001	7355817	7350650	6.89616e+06	13797256
130.05@2.04	1.02933e+06	508163	987385	1.66245e+06	1.66096e+06	1.67299e+06	2.59291e+06	4565498	4644036	3.30772e+06	2.80901e+06	5.29974e+06	3272851	5556896	5561743	3.11722e+06	5596308	5.52146e+06	3.3365e+06	3.13133e+06	3.28006e+06	3.40657e+06	5655729	5573382	2979919	3048196	5.76882e+06	3.46076e+06	3.52792e+06	6071869	3.60696e+06	3781668	4122677	7027024	7.35328e+06	6.9421e+06	4889263	9616201	9069932	10598792	11179288	10823082	6893778	12401493	11841424	12764403	13697863	12621160	8022319
130.061@3.05	68567.8	66519.9	59116.9	61623.6	68190.2	66569.7	74303.7	75037.7	79312.3	95058	91576.3	84502.3	154406	151013	204609	181623	159155	151303	192969	171654	195784	165612	143674	186484	163220	168701	144567	153376	200959	145040	184917	183186	168502	72139	76464.3	65669.7	58940.8	66391.5	73437.8	71670.5	64368.6	66171.1	66555.7	61589.7	71994.6	72105.6	73684.4	73020.6	69307.5
130.065@7.2	357410	380913	411268	394087	422904	428757	411789	445966	434148	431424	431247	447973	414454	439347	432711	412457	422625	435625	397691	407120	416732	417250	419475	431785	411862	416498	425709	399517	427549	442512	401245	437978	463908	380871	393832	435563	403293	433668	457191	413179	456330	457323	431969	453849	460148	432372	457392	447212	435490
130.086@1.09	4.96675e+06	5040352	5.05572e+06	4.85336e+06	4939338	4939807	4781043	4784585	4749472	4414302	4504005	4414821	4.19293e+06	4211133	4.23443e+06	3691728	3.94033e+06	3858695	3.56173e+06	3.59185e+06	3.65586e+06	3.32166e+06	3.30466e+06	3.31656e+06	3.35323e+06	3.31503e+06	3.34613e+06	3.45601e+06	3.56228e+06	3563905	3.52213e+06	3.58788e+06	3.62341e+06	4.92558e+06	4.94542e+06	4923507	4.718e+06	4.85028e+06	4824567	4657228	4.76327e+06	4791255	4460152	4617817	4576520	4319725	4454059	4.30719e+06	4.17082e+06
130.091@1.5	85706.7	93744.6	67011.5	98126.4	118583	111961	116299	120033	114481	80732.4	91176.3	105634	81528.2	75308.5	118823	70962.4	71369.7	63969.2	61814.5	59228.3	52331.6	155858	180012	173165	179344	178689	181753	179228	141071	176845	166200	184199	195144	637297	656705	634404	716562	770666	749606	741084	822519	737794	797511	792279	743682	782773	792505	800642	760058
130.096@0.16	23617.1	13714.3	37175.5	16382.3	12011.2	12829.8	16840.2	18296.2	16861.4	16898.8	23563	18672	17792.8	17446.4	17590.6	13437.6	19131.1	15372.4	13651.1	14898.1	10999.9	17044.7	1000	17106.4	15175.8	16093.5	11582	15977.1	1000	13906.1	14035.6	11849.1	21204.6	20292	1000	13218.6	18357	16693.5	11275.9	23183.7	19343.5	12961.7	16211.1	26936.2	21755.7	18955.4	11271.2	15165.2	12958.2
130.123@13.42	1000	1000	1000	1000	1000	1000	14894.9	33739.3	10152.2	12233.1	85858.5	13188.4	31342.2	14188.2	1000	21578.5	28659.8	223663	19396.7	28334.5	1000	16441.5	1000	14892	19626.8	25202.8	23928.2	27763	25014.9	139877	22225.9	17537.1	22480.4	1000	1000	1000	1000	1000	11218.1	1000	14942.7	15687.7	21100.4	17529.2	16695.9	32125.5	30469.3	1000	15978.3
130.123@13.6	1000	1000	1000	1000	1000	1000	18784.3	15718.8	11034.3	21627.1	13788.3	22770.7	24442.5	22134.3	10297.1	237347	12774.9	28569.2	146896	33446.9	14144.4	22446.6	202768	16044.6	11110.3	177789	10893.6	206376	197756	11480.2	146501	1000	178230	1000	1000	1000	1000	1000	10588.3	10261.3	1000	1000	13681.8	10478.1	10840.9	28901.8	1000	32996.5	28686.2
130.123@13.76	1000	1000	1000	1000	1000	1000	10858.5	1000	1000	21244	21614.4	13943.7	238862	1000	21657.6	26386.2	128452	16393.5	23060.2	25687.7	203635	11032.4	19577.6	218432	133343	15605.1	17993.7	1000	19965.9	27673.2	21227.2	16128.3	1000	1000	1000	1000	1000	1000	1000	14290.5	22944.2	25657.4	28499.2	11250.4	27049.9	21851.7	1000	24196.5	20006.8
130.123@11.86	35959	34554.6	41327.6	40565.4	64288.1	19556	65952.2	30047.4	46956.1	43531.9	65877.8	59577.7	40923.8	35553	34286.4	39583.8	37043.3	59509.3	57067.9	37283.5	41705.2	60709.7	46014.3	56318.8	35453.7	34435.8	39057.2	29569.6	33552.6	29160	34734.4	28237	27980.7	31984.6	35710.6	33293.5	73621.8	50744.5	67323.5	66765.2	74303.8	65604.2	70006.7	41758.4	59228.9	64595.3	36551	58938.4	38013.7
130.123@11.64	24016.7	26231.6	27711.1	26628.9	26248.4	26031.9	23737.7	26539.3	24202	26240.7	17909.9	10964.8	24959	22437.4	23993.6	23290.4	21026.7	19578.2	19749.4	22734.5	20260.2	21244.3	21831.3	20106.1	21365	23030.7	24089.8	22347.1	21189.7	21413.1	22035.9	21489.6	22074.6	26525.2	26778.6	23209.8	24694.9	22762.7	25172.8	20184.6	24529.6	23270.8	17676.1	18854.2	20713.2	15970.5	25520.7	21530.9	21524.4
130.159@15.55	14649.1	10016.4	14759.1	1000	23042.4	26157.5	23723.1	14791.8	13931.9	1000	32527.1	10534.8	38047.6	21734.6	16524.1	20136.8	24306.6	38758.1	16664.9	25711.8	17127.9	12295.4	11562	14285.2	23059.3	61755	17808.2	1257139	1.08675e+06	1125816	1484520	1.4851e+06	1.34024e+06	12288.9	10433.4	1000	1000	28702.8	14589.8	39536	20062.6	15684.7	1000	13220.9	62153.3	1000	52765.1	1000	20794.9
130.159@15.83	10599.3	14881.9	1000	20332.6	27511.9	47566.8	1000	1000	1000	29502.4	13568.8	10260.2	33774.8	28916.6	51345.7	15108.5	17800.5	58166	49888.8	31056.4	13671.6	50449.8	36451.2	43672	33247.6	14982.5	19761.8	9243416	1.47829e+06	1.44024e+06	1.60642e+06	1.53908e+06	1.5671e+06	45125.1	1000	12286.3	15883.5	15478.6	28131	22103.9	12204.2	22701	24788	18086.1	41591.2	50396.9	32718.9	25569.3	63811.3
130.159@15.95	43150.6	21692.8	27721.4	12714.9	19889.2	17867.4	13136.1	46055.7	29540.1	103009	17663.3	12351.5	21449.5	36602.4	40067.7	28574.1	27042.8	42412.3	42472.9	30359.7	11275.5	16737.9	36792.5	36174.5	50692.5	48398.5	42224.4	981937	9599524	9615232	11013696	11105343	10579068	1000	10909.6	1000	1000	50783.6	10136.8	38161.2	33463.4	16878.9	24929.9	31413.7	27836.1	47117.8	35856.4	27095.2	160530
130.159@7.64	93145.2	80408.6	76505.6	301470	304026	280937	317755	178570	188865	184483	186100	190905	307402	305412	290063	299842	311239	298982	201144	297463	308099	302254	307204	192272	307298	303945	313836	138580	150420	144532	155430	144854	147496	48154.3	84147.8	84095.7	281943	294409	383858	159039	308998	166573	182203	164268	208336	271006	281852	287723	285979
130.159@0.22	25196.1	10036.5	51723.2	11870.6	29177.3	25797.4	58153	62087.7	45025.8	63221	63319.5	46458.9	11990.6	61034.1	68041.8	14309.5	26609.9	67784.9	49306.4	79783.1	86756.8	1000	75987.3	10487.2	10842.7	14627.6	65651	1.20094e+06	210779	264771	892862	319800	225794	59783.6	22835.2	27287.8	12832.7	30796.5	19010.1	32876.4	53028.3	49480.5	40750.7	25786.2	63746.9	39278.9	47320	30972.7	78440.8
130.533@0.34	87228.7	113726	70518.6	83481.9	120007	144758	104413	100663	78651.3	64020	26896.9	84723.4	135124	83477.4	103144	83584	50241.1	114586	104476	40732.1	90478.1	52879	61877.1	73318.9	97670.3	99262	107682	51872.8	75238.8	62678.6	65927.1	81849	82675.9	94205.2	53018	123039	118182	71125.9	79315.7	107303	100234	91695.9	77615.7	66623.1	70771.2	122221	89652	138286	122013
130.602@1.4	1000	1000	1000	1000	1000	1000	1000	1000	1000	1000	1000	1000	1000	1000	1000	1000	1000	1000	1000	1000	1000	1000	1000	1000	1000	1000	1000	1000	1000	1000	1000	1000	1000	1000	1000	1000	1000	1000	1000	1000	1000	1000	1000	1000	1000	1000	1000	1000	1000
130.966@0.47	1460832	1.83511e+06	750872	1.73638e+06	649914	617494	1731228	604831	609517	623418	590790	591776	577534	579926	610650	586386	606942	635374	1.36435e+06	600776	1.69542e+06	563242	1.46095e+06	1.70069e+06	1.63636e+06	1.25003e+06	569928	543405	1.82072e+06	587641	557317	623182	597108	1542134	744878	707101	627403	1.48267e+06	590179	637172	1411600	1.7985e+06	1764522	609335	1498928	598982	602717	565517	1.79444e+06
131.037@15.75	1000	1000	1000	1000	1000	1000	1000	1000	1000	1000	1000	1000	1000	1000	1000	1000	1000	1000	10411.4	10902.1	10773.1	24658.4	1000	10574.3	1000	1000	14522	1000	1000	1000	1000	1000	1000	1000	1000	1000	1000	1000	1000	1000	1000	1000	1000	1000	16200.1	10018.1	1000	1000	1000
131.049@5.28	631133	682241	680530	635877	675232	689281	619832	677287	649257	645585	611711	661598	558756	612363	594037	535943	529987	556118	467777	517675	535563	497091	523974	506487	523209	512218	550955	504386	538144	516851	519607	522004	579741	986930	957456	1.00116e+06	919634	1.04886e+06	1.0113e+06	1.01274e+06	1.04979e+06	1.04309e+06	966052	1.02637e+06	1.0049e+06	891090	1016115	911278	927408
131.049@5.64	1000	1000	1000	1000	11184.1	1000	13978.8	1000	1000	16861.9	1000	15080.5	1000	1000	12554	1000	1000	1000	1000	1000	1000	1000	1000	1000	1000	1000	1000	1000	1000	1000	1000	1000	1000	1000	14408.5	1000	1000	19604.5	22097.1	1000	15963.2	1000	1000	22152.6	1000	21578.4	10581.2	13265.2	1000
131.053@1.93	23827.7	18707.5	1000	71233.2	37573.6	84976.9	123664	134479	136720	153730	156645	116717	162583	165903	279624	141398	280544	155483	155872	157287	173887	141168	287316	288916	170866	169157	304734	154453	179495	303673	172842	182363	173741	196199	212690	185479	243933	261126	271829	282684	576881	298934	347008	649918	619112	674877	383926	360217	386637
131.07@8.53	22324.7	22769.3	27214.2	22303	24660.7	21100.7	24211.9	21225	26336.5	21609.2	24385.2	20802.2	23448.2	22439.7	27453.2	22829	24125.7	20087	20956.1	21370.5	21668.3	20569.6	20268	23036.8	23101.4	21315.1	20098.2	23317.3	23080.3	25864.6	25714.1	26500	25157.4	20522.7	24407.3	23212.5	20838	20319	19818.5	21984.3	21710.5	22337.3	18247.4	21589.8	19787.8	22787.4	25085.8	22278.7	20306.8
131.09@1.09	225968	228291	235018	220916	219030	214120	297293	218984	292645	195474	204055	205634	253820	188892	180325	233048	174615	176184	164232	155625	166683	156772	161030	161242	211191	158067	213955	160490	133855	176829	210793	223697	174189	230413	231361	243425	212498	226529	196227	200255	223773	216477	221569	217766	213019	185362	215887	206716	192674
131.129@1.07	1000	1000	1000	1000	1000	1000	1000	1000	1000	1000	1000	1000	1000	1000	1000	1000	1000	1000	1000	1000	1000	1000	1000	1000	1000	1000	1000	1000	1000	1000	1000	1000	1000	42558.3	44514.7	43582.7	57261.3	54326.3	50857.7	52290.7	63901.9	47366.1	50288.9	56662.8	55075	50909.8	58542.8	54207.4	60026.8
131.533@15.36	67120.7	53650.2	42362.1	20886.4	22102.4	65531.3	46768	25805.5	12198.3	26391.8	27235.2	22158.6	33881.4	29831.6	214790	33993	59242.2	39102.1	24399	81202.4	16780	27010.4	160987	19930.1	26454.1	22287.3	166164	339011	298547	303097	333879	135554	338905	20179.3	88747.4	16234.8	32476	50457.4	32636.3	41574.2	28850.6	37282.6	79556.6	38842.8	33910.3	97945.2	27374.1	22100.6	29838.1
131.533@15.53	14223.5	20768	61872.2	26705.7	12791.5	12432.6	1000	19369.6	26730.5	12696	87330.7	27422.7	43932.4	54282.5	56012.7	18798.3	62671.5	66356.6	39587.9	35831	25404	27084.6	61796.6	51427.9	47656	18008.6	38555.5	39695	48184.5	53780.9	102308	101724	34927.3	85931.1	47289.2	16234.8	28414.5	1000	36611.9	16616.9	24242.8	69682.8	30209.3	40350.2	12938.6	19138.6	27618.3	34844.1	18042.3
131.533@15.66	1000	65172.3	88105.4	19830.8	36459.6	1000	19838.2	14867.6	26957.9	21744.6	49497.5	19189.9	10650.4	59857.5	62104	22027.6	61313.4	20820.7	162243	31319.4	40643.5	34208.6	51384.3	24669.8	21064.5	35020.1	48085.3	37957.6	81564.9	38634.4	67304.6	50465.8	25416.3	21172.3	41521.8	50711.6	41216.5	1000	31958.3	13686.9	28448.4	27827.4	31353.7	28279.8	25293.7	33930.5	31109.9	28782.1	33631.7
131.533@15.78	1000	83028.5	83346.1	16061	1000	1000	22183.2	24295.3	19917.9	15981.6	33487.4	49939	92663.2	35374	16993.4	61006.3	29763	38843.6	23293.8	33303.9	47366.5	38005.2	28415.3	24669.8	21064.5	51082.4	55797.5	34369.5	41278.8	29203.6	91524.2	53217.7	18746.6	24582.4	40839.1	17585.9	37091.5	43602.8	47034.5	20697.5	32746.3	39394.1	16661.9	15712.4	34743.3	42247	35875.5	35429.7	51941.8
131.533@15.9	42689.8	13147.9	22684.5	20664.8	1000	26342.3	33863.7	16589.8	42595.1	39092.9	35396.7	29341.7	18883.8	23182	41906.5	47761.3	46025.6	29259.2	48569.1	76396.7	48674.5	36427.4	20294.4	51657.2	23612.6	46156.2	17893	29595.3	63135.3	57257.6	27833	70124.5	45590.4	14869.8	19032.2	33775.4	66557.6	33862.4	27176.1	103791	43724.4	12541.5	16661.9	1000	15175.3	13021.4	16519.9	22939.5	50219.5
131.533@14.82	22175.3	73267.4	84182.7	30785.7	42457.6	36101	58728.7	81209.6	59839.6	32098.3	75496.7	28479.9	15718.3	22622	30472.5	14930.2	33460.2	60291.9	54461	50057.2	51447.7	46845.1	56851.7	17946.6	43262.8	46612.4	48235.4	89764.9	18425.7	92939.6	50146.3	72772.2	35926.7	75419.6	17683.7	36264.9	34127.3	16107.2	71398.6	45792.7	35433.1	16796	43548.1	50182.3	51847.4	43392.7	24773.4	62133.6	17145.1
131.533@13.32	36636.8	67585.7	23219.4	38279.6	77390.1	25956	29860.6	69660.1	56705.4	27756	62457.3	73356.2	44625.6	60072.2	46556	31954.1	47979.6	29233	54177.8	57866.7	55918.3	24344.2	49277.3	47132.9	30532.5	33520.1	78176.5	106462	39635.3	55605.5	63156.2	102571	110511	27760.1	29132.6	50170	55572.8	20736.9	61821.3	82467.4	32866.3	51211.6	32157.3	72487.4	16440.6	56428.4	68737.5	40398	50250.5
131.533@13.57	61223.3	50400.8	51984.2	34562.4	80589.1	32844.1	76601.7	70858.4	81085.6	51815.1	78828	67421.2	96043.6	41121	71260.4	65070.7	101831	96599.3	94258.9	98389.9	98139.3	56004.9	34469.4	42510.2	102336	52056.6	54220.1	107562	110364	36731	131853	114733	62737.4	30229.2	86368.8	244109	54073.6	20758	52638.3	30171.1	40667.5	50247.5	96737.4	29945.1	59276.4	79641.9	93274	93920.8	102494
131.533@13.1	20117.6	58414.3	24960.5	11035.8	15549.6	45010.9	12647.1	28635.2	41206.3	16579	65941.4	59226	39084	43694.2	63714.9	62762.6	26638.8	52415.4	36245.8	59624.3	1000	35231.1	46994.3	47409.5	14539.7	64769.7	40902.3	64915.5	70162	35597.8	91491.6	37556.3	54032.6	37475	47496	15810.5	38845.1	37570.1	38941.5	56583.1	53313.7	15997.3	58379.6	22050.4	24348.1	29527.8	55491.5	63759.5	48868
131.534@13.77	123911	60695.2	102379	1.01186e+06	53980.8	78673	45788.7	106533	63689.2	46989.9	99548.5	111661	65015.8	98518.6	49857.2	108343	63314.2	111004	102049	22080.2	69936.6	101761	78941.7	113574	112342	87690.4	95376.9	94780.2	100138	113034	168239	140667	119142	66297.2	65088.9	67251.3	78025.2	36486.7	18339.2	52850.5	71354.7	65165.5	58360.6	112785	941495	36856.3	43936.1	122267	61828.2
131.534@13.89	82283.5	126286	140008	19400.6	31987.5	92079.1	64219.8	110555	90363.5	114822	113345	99833.7	113890	104535	130666	37578.6	23114	124179	78959.4	35604.9	85857.8	104641	58934.9	121347	59049.6	107123	76676	134625	154311	149555	1.27257e+06	151347	86565.3	103500	117188	57011.8	827423	36486.7	76533.4	45942.2	108185	66875.4	99985.5	65772.3	72553.2	117810	115142	1.00779e+06	1.0826e+06
131.534@14.38	1.22747e+06	132136	54162.9	55999.2	48445.3	1.09335e+06	55244.4	107486	39789.6	106534	67140.7	109121	92364.7	95574.9	54570	44212.3	113362	128074	73483.1	103300	32307	105074	100621	111267	92907.6	83629	23816.3	146787	138135	62237.4	91791.9	144943	134108	133309	57892.3	733644	33911.9	96863.4	113045	110477	77173.1	86229.2	1.03771e+06	123974	89989.8	103159	37138.9	61456.1	77531.1
131.534@14.04	30751.5	38011.9	1.08509e+06	106139	100462	96873.2	57197.8	61383.4	63362.4	1.06041e+06	918379	967768	75647.4	51580.9	1.09072e+06	1.02511e+06	1.01138e+06	1052933	118652	1.00637e+06	1.00066e+06	971666	62021.4	963224	943548	111017	1.07918e+06	113736	1.33384e+06	136825	163101	172067	161145	100053	961158	94930.4	111781	102566	60116.3	1046874	119577	124289	47477.8	951877	56243.7	125256	71374	122918	74018.5
131.534@14.25	111804	911143	112000	64320.4	1.03623e+06	125699	59253.6	1103094	972605	26955.3	105138	86844.6	1.00565e+06	1.0737e+06	132128	88131.9	114769	113139	957383	62357	122891	104439	1.00098e+06	39473.9	112608	116449	84808.8	1332662	119550	60775	129461	1400803	140064	1147881	52125.8	111419	37113.9	103240	848256	133262	949765	1.02066e+06	111249	60143.5	118481	1.12243e+06	936807	55803.1	125469
131.534@14.14	131478	64940.5	74256.3	114267	112216	68925.3	1.01362e+06	41444.7	71102.7	88592.4	124934	91877.2	130820	125065	130566	121478	113197	75430.3	78756	68276.4	126152	36888.4	117883	117900	108636	937999	127077	147819	108829	1.331e+06	163426	162635	1.34495e+06	72143.8	100347	111379	68956.1	861144	104136	128824	66053.2	85581.4	112152	95038	38608	134579	126245	55803.1	107886
131.534@0.3	1.35453e+06	1.37661e+06	1.63269e+06	770474	893023	1.12678e+06	1.03259e+06	1.02003e+06	950634	940014	857662	1.01394e+06	1.16838e+06	1096456	1.15756e+06	1.1051e+06	1.12551e+06	1.1811e+06	957224	848840	911278	893102	908330	936546	1.01282e+06	1126172	1.16219e+06	956696	1.08918e+06	1.00589e+06	1.16493e+06	1.17196e+06	1.15249e+06	1.18701e+06	1.32504e+06	1.34529e+06	844267	200302	739206	1.02173e+06	1066829	972038	947786	879427	971114	1.07161e+06	1024431	1.112e+06	1.21365e+06
131.93@1.43	77359.4	65049.1	65110.8	43235.8	41150	45631.7	46976.4	43455.9	34499.6	46428.8	73849.3	44726.6	57139.8	51423.9	75168	62319.4	94038.5	89630.1	98505.1	71737.2	100058	59859.7	95131.8	99059.7	72623.3	67545.3	57203.7	103074	86693	100921	67900.1	71658.7	60412.7	36284.3	33328.8	32084.6	33317.7	34843.4	26108.3	26632.7	28853.8	28875.1	33624.5	29437.4	31542.4	34963.1	32431.2	36021.7	37385.3
131.93@0.33	569640	690851	654770	466023	636854	599394	463487	423664	55049	238661	229463	317854	487587	244206	353736	350500	386695	398861	325032	242467	55788	265564	78293.9	279064	316612	318485	324098	143134	149744	137402	148160	167759	161713	446368	653180	546003	505451	688874	493458	358082	391806	310246	268970	83906.3	236411	387815	60033.4	457166	381941
131.974@0.49	98773.8	107976	167713	79809.7	77473.6	143486	78496.9	171803	134935	83355	77662.1	75377.6	81748.2	121566	154091	145987	81383	90055.2	117508	85411.8	113598	84347.9	84616.3	86174.2	80597.2	85597.1	86104.9	91062.6	98148.7	90215.5	90737.8	94952.8	163004	106591	220617	86099	156333	97213	169131	82554.4	79899.1	77095.8	90795.8	160772	81963.8	171575	97115.5	88034.7	90918.5
132.007@1.06	17873.8	16035.7	17808.2	20240	19574.4	16221.5	17860.8	15827.5	17878.7	14188.5	17501.2	15563.3	16635.7	15647.6	17948.1	14036.6	15650.4	16237	17200.9	16972.3	15884.5	17344.7	17451.5	17996.3	18185.3	17984.7	16119.2	20203.5	20167.6	21516	22967	22758.8	27385.8	15833.8	16003.7	18773.7	16845.6	15735	14712.3	17847.4	15512.8	14158.2	13446.8	13804.8	13269.7	15938.9	15144.5	15294	15590.8
132.035@0.3	157954	45944.5	65282.9	58131.2	33137.6	31328.1	88601.8	119534	90562.5	93407.5	73374.8	106273	146151	113178	109266	119570	129494	88677.3	93803.5	39826.3	58114.1	77253.6	95593.8	90973	69650.3	52319.3	101919	67088.6	110795	111905	87183.2	75040.5	131226	135731	108810	114898	52775.1	60685.7	71901.7	94630.8	101606	68006.4	91883.6	90394.7	76432.9	106785	112444	119504	119127
132.044@3.05	33621.3	39386.7	39823.2	40467.7	43788	43226.3	43618.6	45782.2	43537.3	45397.4	45759.6	47246.4	48046.6	49759.7	48320.4	45840.7	46749.9	43530.8	46504.1	45090	48262.8	48594.3	47898.1	50391.4	49400.2	49582.3	49847.7	48296.6	50028.5	48493	46805.3	48485.8	52922	36991.9	36373.7	39966.5	39032.3	41688	42799.1	37991	42601.7	44765	41061.1	45222.3	44151.9	42093.1	46670.3	42884.4	44436.8
132.045@7.21	1000	19671.4	19088.9	15811.4	23487.3	15234.2	16080.8	23462.9	25219.8	11694.8	21318	21895.4	22068.8	22982.8	25877.5	22211.4	22532.5	25598.5	22409.9	23473.2	24533.7	17798.7	24502.7	24395.1	24082.7	1000	22898.8	19758.9	17409.3	22196.9	22692.2	27220.7	25543.1	10011.8	21613.1	15785.3	19530.8	26030.7	24862.2	23387.1	20498.5	26066.3	25664	23650.6	20495.3	26746.5	26033.2	26876.5	25157.9
132.056@16.32	19250.7	21648	240634	42043.8	29446.5	60657.1	13223.7	10163.6	21881.2	37534.7	42271.4	15743.2	25473.7	26965.8	32690.8	36568.1	22930.2	25210.6	15250.3	26198.5	35924.8	21664.1	23658.2	45547.5	15401.5	44743.9	13705.7	17980.9	55092.5	99925.9	49358.6	16618.8	65948.1	58583.8	25775.6	31380.5	36014	61984.8	143815	45966.9	28618.6	23970.9	39099.7	12738.7	45521.9	41467.8	46088.7	16371.4	40436.3
132.056@16.44	40361	40385.6	76996.9	42593.7	19463.7	57957.7	1000	30027.7	18322.5	34509.7	16227.6	27675.2	28357	30697.1	26894.3	42851	23962.2	22586.5	1000	25170.6	19102.8	45528.3	189563	29835.1	60276	1000	14701	248098	323333	42244.7	83586.3	61673.9	318944	40124.1	193330	67272.6	34419.4	28863.3	32194.2	24693.9	42301.4	24417	34395.7	27796.3	12281.2	32618.7	16640.9	34723	20877.3
132.056@16.62	32497.6	33476.1	59742.6	26046.4	48951.8	22521.3	21558.2	1000	20518.2	27217.7	37988.3	35011.9	25309.9	1000	30212.2	1000	22274.6	27408.1	28382.8	38096.5	26184.7	23595.6	29471.1	22970.4	14132.6	42267.1	18436.6	74418.7	54985.1	31544.5	335391	80806	33828.5	24604.6	42085.9	35675.4	1000	64448.2	21966.6	20142	24713.6	34314.7	14704.2	44107.5	17149.2	18739.1	37410.2	19523.1	13227.5
132.056@16.96	24778.2	37120.8	40172.1	13476.5	22779.3	42770.2	26829.8	14374.5	19800.3	23280.2	16221.2	34158.1	15834.5	10438.3	22618.9	19327.5	1000	43395.8	10809.7	28693.1	24268	35327.2	20570.1	12232	19991.5	17211.8	38963.1	81218.7	21287.4	22516.1	62396.5	25711.1	23601.8	10622.8	19412.4	23787.3	23681.2	40560.1	15659.4	23009.9	11665.2	10684.5	13354.5	38213.2	13621.6	24917.3	31839	13527.4	15374.4
132.066@1.23	7410046	7425904	7.49023e+06	7.12717e+06	7305672	7.23998e+06	8.32604e+06	8152042	8.14315e+06	8049108	8.0813e+06	8117124	7948439	8112937	7951577	7553145	7715562	7.45803e+06	7.22664e+06	7276981	7359188	6960653	6.9349e+06	6.91892e+06	6.99187e+06	7.05049e+06	7166541	7352634	7.27634e+06	7.40806e+06	7.39739e+06	7.46957e+06	7.47818e+06	6.34792e+06	6.43148e+06	6.4217e+06	6064810	6149525	6.13123e+06	5.98737e+06	6027160	6185850	6664066	6673546	6771198	6649763	6.67149e+06	6.73428e+06	6455551
132.081@7.2	848022	915494	952645	880409	955838	934653	849044	907373	909617	859178	872491	869257	801958	848015	820161	766625	788305	809501	743345	792943	789824	744940	779108	793830	759436	756466	779574	729877	771884	774594	712539	776610	812229	941722	944842	1.00138e+06	917864	988734	1.01323e+06	914685	966554	963474	905330	952760	963152	879824	948242	926722	869224
132.102@1.29	16705.4	1000	31157	1000	12875.8	12088.4	10010.5	12142.5	1000	1000	1000	1000	1000	1000	1000	1000	1000	1000	1000	1000	1000	1000	1000	1000	1000	1000	1000	1000	1000	1000	1000	1000	1000	129686	184355	189142	166402	173847	116719	141109	164647	135507	143946	140173	127378	134821	128967	141722	131311
132.102@2.19	123580840	131207800	132335780	120378490	128761990	128659150	118093670	124010504	122932240	117450670	120750740	119696610	114023050	115568830	116948744	106873780	111257550	110631230	102730660	106661384	109274260	103099510	107834410	107462760	106032670	108019030	111213070	109668670	113951560	113931730	107213750	113403816	117637576	143901710	148989060	150015180	141524640	149228820	149672030	139590020	147757920	146810600	136367870	144236640	141330270	135981490	142628980	138298610	132125224
132.102@2.32	1000	1000	1000	1000	1000	1000	1000	1000	1000	1000	1000	1000	1000	1000	1000	1000	1000	1000	1000	1000	1000	1000	1000	1000	1000	1000	1000	1000	1000	1000	1000	1000	1000	1000	1000	1000	1000	1000	1000	1000	1000	1000	1000	1000	1000	1000	1000	1000	1000
132.102@5.37	112624	120045	119939	86347.1	95446.8	91302.8	75435.9	30245.6	76104.1	17498.1	45444	64205	40537.3	32520.1	31889.8	54803.6	58468.5	57423	51658.6	46019.8	35060	19772.6	20741	49971.4	23617.5	12991.3	46822.6	42007.8	55659.5	55824.2	52197.9	37617.6	56392.2	191517	208061	188216	174548	119520	149345	146090	152214	144949	121575	70944.9	109775	72851.2	111800	122289	98110.9
132.102@5.12	124184	117649	118624	101898	97926.4	98980.5	71575.1	75235.4	77380.1	58740.8	56070.6	64300.3	54998.2	65934.9	60158.2	54919.1	54891	57689.9	44741.3	55338.7	50163.6	46870.6	50304.5	29406.6	40972	52135.8	54627.5	57463.3	56195.5	56615.9	51100.9	47637	56685.4	203839	204071	195328	116927	135233	133431	105873	101157	106419	84375.3	85175.2	79120.1	78640.5	79721.2	16387.2	64287
132.102@4.29	143121	137010	145621	113913	114643	122205	102849	93310.4	86173.1	78128.7	90599.7	84891	85650.5	81872.2	82313.3	72606.7	69759.3	76674	73858.6	74510.2	77737.3	65339.3	71482.1	71518.9	72551.8	64341.9	72048.3	71749.6	74346.4	73761.2	65895	69942.5	78597.2	159166	155804	147438	133741	123986	138206	105888	105082	117565	94967	111014	102021	98841.4	97271.7	95979.9	92177.9
132.15@2.21	31701.5	51945.5	62469.7	51336.4	62513.2	18657.6	15003.5	61573.4	53330.2	47410	20559.9	19914.7	44560.3	1000	52777.8	54027.1	15440.6	20534.2	57984.5	45178.8	54313.3	43498.2	45056.6	50003.1	24262.3	46337.3	67332.7	1000	13429.4	50956.4	17564.2	37520.8	1000	22586.8	83702	79949.6	81738.3	79120.7	84901.3	16995.1	54685.9	38690.1	72087.2	30424.3	71604.6	30345.5	69847.5	79921.4	17242.1
132.531@13.65	12067	1000	11284	1000	16146.9	1000	24596	47700.6	23981.9	12512	1000	12720.7	20481	22024	16929.1	20039.4	33377.2	42808.9	20899.2	26952.5	1000	23355.6	35978.1	20278.7	14166.3	18201.9	45213	19396.5	49917.9	19198.1	56398.9	39862.4	30914	1000	1000	1000	1000	34430.2	14962.1	1000	12120.8	18489.9	25838.6	12434.5	24347.4	33449	16323.2	19228.5	65964.3
132.531@13.77	17776.3	1000	11284	1000	11612.3	1000	23184	13157.6	29240.4	11219.8	26801.7	45830.5	34912.7	14108	18714.6	383410	14163.3	18349.2	1000	48281.5	42064.3	15801.2	36463.7	18007.8	17803.2	28110.5	15923.6	18010.1	42208	60358.2	20884.3	19723.4	24304.8	1000	1000	1000	1000	11707	17647.2	1000	25333.2	19030.1	13496.8	14780.9	44216.2	18764.2	38837.2	13565	27522.9
132.531@0.31	548781	260913	308702	299237	250967	155008	409055	410275	398989	380014	1000	224250	493098	435843	452167	407559	482952	447679	398418	390149	368334	366770	371412	392535	447688	480205	325557	414642	408011	412137	426626	470313	475550	245870	487474	512093	387930	165500	195947	400382	417787	400433	369814	359920	369761	247859	1000	451733	480317
132.531@13.9	17776.3	26746.3	20601.1	26577.9	57834.3	21332.6	16707.9	32062.4	26587.9	236665	155886	1000	301871	14108	19668.1	15341.1	40722.1	42903	1000	47191.8	23589	38585.1	12645	50589.7	1000	336339	31361.6	33570.7	44802	558982	530893	61910.1	59930.1	19013.7	1000	21003.5	17804.8	42870.9	15389.9	19822.8	28917.9	33520.7	12872.4	36631.3	1000	25221.3	26944	27229	35012.8
132.531@14.32	1000	15567.5	46306.1	23165	62326.8	1000	25726.8	32190.2	115044	11676.5	1000	20978	24357	23087	40782.9	30101.3	34080.2	16981	45786.9	325305	17271.2	14930.7	1000	42232.4	328341	37324.4	42412.6	37479	54165.2	42181.4	66637.7	34705.8	19291	16302.3	10618.1	1000	20230	10587.6	49139	67340.1	38663.4	157937	42689.4	323500	14840.3	19996.7	41922.9	17856.8	30752.9
132.531@14.04	1000	39019.2	1000	12630.3	34433.6	55859.2	21583.6	103910	13393.3	25503.6	33444.2	41638.4	26867.8	22646	23903	44849.9	1000	49607.7	21780	23959.5	36161.9	18962	340196	356056	21462.2	23431.8	45518.2	435090	511434	52762.7	66431.8	53137.4	516347	110568	31878.8	1000	70364	25003.2	37004.6	32446	42466.8	28632.5	1000	35170.5	303568	334547	25789.4	40448.4	50633.2
132.531@14.2	24780.7	19455.1	25393.5	20340.3	30830.9	1000	10297.4	23037	10407.7	11130.5	48686.1	39683	37435.9	10337.3	264817	45869.6	50424.6	28483.9	33686.5	31188.4	279365	339491	39285.1	37127.6	36153.8	37865	29934.2	28785.4	50093.6	11808.5	65809.4	558504	41036.3	50968.3	23091.8	15311.2	41220.6	34055.6	24922.2	32855.7	10541.5	51512.6	16487.8	39682.7	47838.5	24408	23504.3	25733.5	30566
132.998@1.06	28683.3	27011.8	28763.1	30267.6	28937.6	32812.9	30382.3	35203.4	31262.9	30563.9	32079.8	29833.8	31258.3	30620.6	32044.7	28939.2	32625.9	28268.9	28958.7	29747	31123.9	31797.9	38157.8	30122.4	34608.9	31139.1	49772.2	38832.5	37821	37774.2	35200.9	37088.9	42937.6	55979.1	52020.1	51233.5	54726.1	56558.3	52618	54132.2	58741.6	56428.2	57011.6	59043.6	53581.5	55321.3	56537.7	58328.7	58783.2
133.008@1.62	1000	1000	1000	108042	74393.2	119554	216920	214816	232261	339967	338925	350289	395442	398632	397498	409805	401055	418562	436525	443103	424584	441611	456498	449815	454564	456305	458280	403030	398380	411997	406918	416280	413726	105805	100501	98295.6	183410	177516	176680	210855	221475	220546	245940	241102	252657	289661	283715	297692	296787
133.032@1.55	4.13457e+06	4.45093e+06	4.49449e+06	4071792	4339454	4453728	4.06469e+06	4.19327e+06	4168820	3.77923e+06	3.951e+06	3.89581e+06	3.54108e+06	3.60276e+06	3.63162e+06	3016638	3.11414e+06	3.0893e+06	2.67173e+06	2.80458e+06	2.75982e+06	2543017	2.65224e+06	2.71232e+06	2.65766e+06	2.65837e+06	2743096	2758965	2779426	2.84511e+06	2.68248e+06	2.87607e+06	2952607	4049220	4176166	4.2305e+06	3.95765e+06	4.19093e+06	4248942	3904970	4140586	4.10315e+06	3.77017e+06	3.96773e+06	3949635	3.70321e+06	3.85519e+06	3.82908e+06	3.53753e+06
133.061@1.22	8.1975e+06	8.04016e+06	8039651	7706058	7701808	7.65426e+06	7.65245e+06	7.36842e+06	7.324e+06	6753615	6756998	6604602	5600766	5.67135e+06	5.47539e+06	4.17408e+06	4.15702e+06	3992316	2.91108e+06	2.79667e+06	2.86812e+06	1.95025e+06	1.76928e+06	1.70659e+06	1.59344e+06	1.59437e+06	1.43598e+06	1.4604e+06	1333022	1345875	1177463	1.15332e+06	1.11721e+06	7814601	7796052	7776098	7369842	7.35238e+06	7363910	7225549	7.08922e+06	7.17453e+06	6.81146e+06	6645721	6693444	6066386	6.13291e+06	6.02413e+06	5.03944e+06
133.086@14.77	1000	1000	1000	13325.5	57164.4	32496.3	37021.3	36954.1	20063.5	28007.5	12470.9	60795.5	34912.9	64699.3	48848.7	69416.5	14748.8	41235.4	58697.6	49137.3	60552.7	26822.2	38564.6	69586.9	28701.5	60281.7	57430	31627.8	47326.7	52174.7	14572.2	308067	17027.8	11097.3	23698.1	45902	20726	36879.9	13562.6	28523.5	34255.5	27514.4	14037.2	59941.3	56584.2	18079.9	47319.1	53981.6	44367.8
133.086@14.6	14970.4	35115.6	125506	290260	290742	293261	260468	293765	299519	334706	324989	325274	336716	337656	325369	331573	333518	300948	334463	315347	344266	342477	362759	357070	324652	339327	359222	308500	294332	273026	285730	41828.8	53984.1	20602.7	26973.9	166350	294814	266069	285819	276912	300021	320436	307333	333593	301459	308128	313506	313269	306208
133.086@12.83	1000	1000	1000	1000	15851	14989.8	12739.9	13849.3	10281.2	18582.5	17592.1	19250.1	19544.8	18832	22141.3	21789	25901.9	19506.4	26528.9	22885.8	21834.9	17942.4	21007.2	33865.4	12392.9	21483.8	20255.5	17170	19854	27128.6	17891	26695.4	18866.7	1000	1000	1000	1000	13923.9	11697.4	1000	17533.8	16606.3	17805.4	12976.3	17851	19367.7	21400.9	22345.7	18435.3
133.093@1.06	16119.4	16237.4	13315.3	14026.5	14657.7	17323.1	13680.2	16078.9	13583.2	14875.2	13844.6	14916	10365.3	17685.6	14474.3	14311.9	12894.5	14416.9	12553.6	14031.4	14466.9	15108.3	12706.1	12531.5	14864.2	15818.2	13518.5	18536	16828.7	18692	16083.2	15844.7	18146.1	213130	217821	191527	210883	208506	187110	212747	233200	213461	212687	216322	207106	219419	222293	209460	211475
133.105@2.19	4329799	8929000	9026337	4198845	8737536	8716736	8.0476e+06	8414095	8351501	7.96332e+06	8168843	8133862	3.92847e+06	7.81049e+06	7.94993e+06	3.62785e+06	7.61732e+06	7.49748e+06	7033230	7269597	7439532	7017951	7.32798e+06	7286609	7.19143e+06	4171075	4.07917e+06	3.96338e+06	7.7123e+06	4.00633e+06	7.30444e+06	3866514	7.96589e+06	4892115	10187298	5738608	9632539	5.39544e+06	5.39277e+06	9463988	5.36399e+06	5174285	9219027	5107902	9651332	4.78058e+06	4.90044e+06	4.88277e+06	8973428
133.927@0.33	188488	179208	50715.6	126412	184393	177111	137492	136927	18793.2	66392.8	70592.6	101357	145677	83140	21761.1	103258	116978	128325	103388	72244.9	86696.4	86179.7	20647.6	92991.6	95050.8	103510	102327	55993.6	61157.5	13287.8	45331.9	48279.6	19367.7	147987	192876	167993	135569	193110	153203	118044	113985	89983.1	60840.6	27780.1	76440.9	108873	100813	136202	101785
133.966@1.56	1000	1000	1000	1000	1000	1000	18468.4	29309.2	20091.7	31537.5	31124	36551.6	31714.9	74526.1	73033.4	43687.3	78378.4	50416.9	83971.8	84814.3	84559.6	90050.4	90893.2	93282.6	91306.9	91767.5	92016.8	100672	104687	102798	102830	108649	110569	1000	1000	1000	1000	1000	1000	1000	12820.4	12546.9	18203.2	1000	1000	29662.4	25278.8	22181.5	25849.5
134.019@1.18	1000	1000	1000	1000	1000	1000	25127.2	26759.8	27765.3	68141.2	70981.8	72042.9	128165	137768	148451	199902	204407	206859	269925	276015	281436	323968	317737	309588	314800	329697	329418	320817	345785	332712	331589	332405	360936	20643.1	18078.6	23433.8	27691.2	29859.7	31409	47544.2	43234.2	44005.7	72881.4	73952.6	88404.9	139108	136612	157853	233246
134.045@1.23	1.40877e+06	1.36225e+06	1.3854e+06	1.29124e+06	1.2703e+06	1.27016e+06	1421430	1.3997e+06	1.36879e+06	1.30662e+06	1.33597e+06	1.29208e+06	1.19157e+06	1.21583e+06	1.17549e+06	1.02145e+06	953107	968556	794593	809034	794640	732766	748623	775113	876655	857076	935859	1.07349e+06	1.05048e+06	1.11346e+06	1.25798e+06	1263348	1301955	1496356	1.48964e+06	1.46039e+06	1.39094e+06	1.39862e+06	1.34504e+06	1.37989e+06	1.33679e+06	1.32915e+06	1.46726e+06	1.4375e+06	1.46403e+06	1.32945e+06	1.33115e+06	1.26985e+06	1.10158e+06
134.048@8.13	1000	1000	1000	1000	1000	1000	1000	1000	1000	1000	1000	1000	1000	1000	1000	1000	1000	1000	1000	1000	1000	1000	1000	1000	1000	1000	1000	1000	1000	1000	1000	1000	1000	1000	1000	1000	13520.1	1000	10944.2	13212.5	14158.5	10408.1	12723.6	12795.8	13389	12972.2	13595.9	11373.2	11844.6
134.053@1.83	51219.8	51130	48313.8	52639.5	48256.2	47728.1	40608.7	43452	34404.1	27028.8	27068.6	23816.3	11695.5	10440.4	1000	1000	1000	1000	1000	1000	1000	1000	1000	1000	1000	1000	1000	1000	1000	1000	1000	1000	1000	39910.4	44855.2	48644.8	46523.9	47696.8	40367.5	39642.8	43215	38112.4	30940.3	32684.3	28666.6	16720.5	21563.2	16034	10552.8
134.06@7.21	25770.6	19173.4	26046.8	27233.3	30096.3	30992.6	27008	32598	23301.6	29304.6	1000	32939.6	25524.3	22655.9	26023	25602.4	26889.7	27833.8	27778.2	27656.8	29308.5	26195.2	14215.9	22531	24057.9	22954.1	10114.4	23887.2	25231.5	1000	23708.3	26089	22277.8	12043.4	21899.8	31954	31590.8	28201.7	31574.2	31936.8	16398.1	1000	30357.6	35806.3	35788.8	34181.5	31240.7	25165.2	28613.2
134.06@10.24	1000	1000	1000	1000	1000	1000	1000	1000	1000	1000	11563.5	1000	10540.7	11257.6	1000	10499.1	10729	1000	11478.4	11814.9	13593.5	10999	14541.7	14026.1	13194.3	12679.3	14948.1	14202.1	14561.8	17022.6	13636.9	16373.4	16140.4	1000	1000	1000	1000	1000	1000	1000	1000	1000	1000	10107.4	10772.6	1000	12059.3	10855.6	12148.2
134.06@10.88	1000	1000	1000	1000	1000	1000	1000	1000	1000	1000	1000	1000	1000	1000	1000	1000	1000	1000	1000	1000	1000	1000	1000	1000	1000	1000	1000	1000	1000	1000	1000	1000	1000	1000	1000	1000	1000	1000	1000	1000	1000	1000	1000	1000	1000	1000	1000	1000	1000
134.071@16.03	290551	168253	298295	159080	387299	445938	231953	329091	196723	347574	202655	529057	323101	467311	436281	513037	523103	567226	244117	616031	510020	438760	606024	588426	630086	304569	592996	595953	606852	615125	579538	544021	638586	269187	184784	279307	466286	393760	489405	299960	237748	239337	379441	424091	354310	233069	567297	527279	567697
134.071@0.21	41839	32710.8	54219.2	95207.4	36976	104695	108731	87841.7	85137.8	93886	87896.2	104629	121070	156617	96692.5	109402	83489.6	21676.2	125897	138612	92956.2	117808	101031	93089.8	135166	26665.7	97527.4	111323	152413	206614	111881	37512.8	90408.4	45859.4	25733.5	118652	209260	195763	106024	96250.9	128595	96998.5	85281.4	96141.7	94357	143472	98068.6	107346	118532
134.513@0.33	52693.4	49181.5	63226.5	45258.7	19524.4	20378.5	43346.8	46113.8	38917	30949.7	43185.5	48568.7	70878.6	51463	48130.9	44137.9	58349.8	48329.3	44415.4	36634.3	45406.5	35646.8	31974.8	38376.9	51023.9	55573.2	59764	11551.4	30732.3	35951.7	30429.7	34916.1	15103.9	37392.3	42965.2	44369.7	40725.8	32594.6	45707.8	42601.5	45269.8	40795.5	25749.8	23814	17865.3	48827.8	44375.6	38555.2	58768.2
134.534@2.04	1000	1000	1000	1000	1000	1000	15941.5	1000	1000	1000	37592	12343.1	22977.3	40022.8	16070.4	1000	17913.3	34184.9	23560.1	1000	32238.9	1000	31858.5	29103	12506.5	1000	31516	32093.7	18676.2	16865.9	38516.1	41170.5	45293.2	1000	14713.7	13791	25732.4	11104.6	20422.9	23909.6	1000	58907	17715.2	18657.3	66287.5	14988.1	69629.2	66367	64202.6
134.534@1.94	1000	1000	1000	1000	1000	1000	12228.4	15706.6	25743.9	17145.5	12022	1000	1000	1000	15535.9	35977.3	1000	1000	19226.4	10916.7	1000	13015.1	19482.8	19227.3	11245.2	35295.2	20436.3	17319.1	16150.1	17593.8	1000	15986.8	22784.4	1000	17368	29632.3	26072.8	23751.1	1000	24982.2	23518.1	15220	38220.5	33774.3	1000	68169.3	1000	28324.4	26902.5
134.987@5.13	15374.9	1000	1000	17036.8	17352.2	1000	16321.7	12470.4	10271.1	197185	12454.5	1000	219996	18587.6	175480	206476	1000	17594.6	1000	182754	18704.7	18428.8	1000	14158	189447	1000	11228.6	15317.3	1000	1000	19295.8	1000	18857.4	1000	1000	1000	10493	156018	10277.3	12561.2	178857	1000	15612.2	1000	11130.2	18501.5	1000	10188.5	1000
135.003@1.69	1000	1000	1000	1000	1000	15660.1	1000	16462.1	33371	59951.9	63199.6	41973.5	75805.1	70794.1	78826.6	75657.9	76602.4	74920.2	87100	86142.9	80384.4	90070	83717.5	86268.5	89794.8	89841.5	90278.8	136763	133762	131769	135295	143008	138746	1000	1000	1000	18159.5	1000	18695.8	15436.1	25679.8	24792.1	30718.2	28050.3	28510.3	40082.2	35243.6	46813.1	43651.1
135.075@0.21	117380	59032.9	87948	74254.3	247648	157322	115686	99831.8	115681	63656.8	118655	90637.9	93978.4	152478	51889.7	136210	143687	65272.7	90471.6	74243.5	88368.4	158449	85582.1	139180	268580	138899	130376	223258	204802	475072	222684	126979	188270	56288.7	66614.1	121699	174663	238384	378936	63111.6	123226	121721	130703	62906.1	124876	140116	139035	98554.2	98821.1
135.078@0.37	97500.9	121112	97630.8	61272.4	173005	326106	158414	48879.8	148488	52109.8	75748	148996	52594	183867	126338	82613.3	122008	68712.4	73417.2	166579	104889	98279.3	104996	50136	130909	194750	139470	118420	83632.4	228827	97869.6	79625.5	73754	98826.9	160640	209604	72147.8	421451	150743	68814.1	72001.9	62933.1	96234.1	81176.1	157596	84251.6	93327.2	121240	111710
135.079@15.83	112711	30820.9	19975.3	107626	24487.7	66676.2	33266.1	42749.2	56119.7	36510.7	51132.7	29824.9	75625.2	102094	65457.5	75052.2	46194.2	72680.8	33042.8	134842	85504.9	97741.2	27178.8	67055.2	31403.1	52494.8	63374	37500.6	79061	74413.9	66641.3	56587.4	56058.8	50252.9	28959.7	92561.1	96247.2	139985	22134.2	51902.6	52283.3	19805.1	68538.3	85640.6	43166.1	35377.1	133488	147539	41145.9
135.079@16.05	1.34664e+06	782285	1056386	884070	1419732	933985	805099	1.00876e+06	654882	929411	617017	724440	860779	843848	738323	664875	1.01814e+06	689535	564012	1173718	855111	960330	808267	557527	915178	983056	765243	1.13488e+06	434592	787463	682212	1.34995e+06	1.00405e+06	1.22969e+06	911373	1384316	790389	1.19296e+06	989265	876252	689951	909530	842151	853497	1.20845e+06	656997	961569	746038	771925
135.079@16.97	99955.1	91551.6	87915.6	125503	176335	170282	203649	94939.7	80322.6	107843	63967.4	152938	70918	72493.2	134334	85751.9	189263	135165	134358	142873	88862.1	64270.2	178980	142988	153778	74097.7	140058	217510	145870	189056	160634	216085	105353	91746.7	69424.5	70624.1	126902	198870	118283	80852	171175	83008	150404	170886	168912	102804	118667	67219.4	124471
135.08@13.6	43549.9	31434	48808.2	46113.1	42936.5	46349.6	51396.5	40215.7	47836.7	40691.8	42519.2	49120.8	47138.7	43463.2	48075.5	40856	50453.9	42593.7	46809.7	52427.7	49464.9	51070.1	40601.7	43694.5	45450.6	55003.8	46047.4	26703.7	1000	32984.2	32251.3	36993.5	36766.3	48685.8	36706.4	47132	39461.6	49481.3	47133.1	48457.1	49842.2	1000	41232.2	38791.8	42409.9	48761.8	43851	50493.4	38654.9
135.945@5.24	267610	236896	169212	207618	102950	225592	150839	229701	131190	214075	134098	96374.7	158786	249643	161977	3.44733e+06	125743	251728	137634	251563	219417	275182	228641	141589	227208	144171	3270854	181614	308763	161472	4.19184e+06	183115	331877	121885	131969	245060	67635.2	233128	113649	147394	174635	126295	51217.7	249846	3.04965e+06	68400.5	249923	40056.7	227529
135.945@5.1	3.60978e+06	3.38566e+06	3.07523e+06	265273	209316	3085068	234582	275044	126283	266523	204157	3180078	240082	3.18912e+06	231504	253867	221201	268311	209633	3157579	258608	3.27273e+06	3.14199e+06	222917	3.27342e+06	222527	278242	244622	4.00202e+06	240662	331104	256443	3965894	251231	190882	239367	186493	2.98047e+06	244105	3053239	241848	257293	3.06225e+06	2926599	210908	201582	3.02116e+06	176027	3113190
135.945@4.81	298660	273818	269819	3207792	2.78764e+06	240002	235180	246774	2.86266e+06	3.14065e+06	227965	254459	3.08201e+06	263312	247205	279163	2.9037e+06	249067	2.89187e+06	260029	3236214	254643	256567	257145	268149	267880	272506	3.60421e+06	328091	3.45815e+06	332867	3.58817e+06	309507	3.09549e+06	233397	255238	2.74822e+06	270958	228934	242050	238335	253263	263505	259987	229756	2.97322e+06	240835	259036	251833
135.945@4.95	278235	255625	270910	253479	231295	262968	265295	3.1994e+06	268065	264807	2.82551e+06	246170	262753	258136	2.99916e+06	254866	257545	3.20188e+06	234115	244778	260749	270826	237330	2.83967e+06	263444	2.96393e+06	262292	294342	319551	310674	313897	292811	351532	271111	2.74091e+06	3077712	247314	245299	3.00149e+06	248846	260167	3000864	252875	239238	246481	265296	256682	2.66181e+06	269874
135.945@4.55	270065	244766	267601	223946	249903	225635	3020248	223093	240462	243635	239489	223010	240357	249707	253771	268234	248601	246097	252624	246685	235557	236193	229059	224712	247995	235382	236541	297668	297436	275441	289519	306275	289733	246342	250235	246990	245811	242207	242428	235607	246742	219910	234609	216262	225361	237090	248215	224392	230207
135.945@4.45	271627	235851	266681	238467	233372	236654	235521	227372	237480	248477	221739	223480	253625	248855	237736	257315	244827	245188	250730	235670	225563	242480	225608	235331	222261	247108	236477	285507	298266	287420	303437	316454	308977	266486	223877	241411	246376	252707	230766	231240	2858396	231845	216197	222604	240945	263011	248042	230927	250232
135.977@1.17	1000	1000	1000	1000	1000	1000	1000	1000	1000	1000	1000	1000	1000	1000	1000	11370.1	10753.8	1000	17649.6	16953.5	16874.3	23812.9	24240.3	27118.6	27403.1	27741.1	32041.2	28126.8	32357.4	27893.7	25390.9	32190.8	32542.8	1000	1000	1000	1000	1000	1000	1000	1000	1000	1000	1000	1000	1000	1000	10830.1	14296.6
136.021@15.89	15806.3	1000	32505.6	14389.3	36047.5	12722.7	25801.7	88845.9	24517.5	1000	10863.2	57648.7	23546	32705.6	28475.8	11782.5	47554.1	54102.1	18412.9	26664.5	34700.5	68136.5	14273.1	12308	13270.7	25947.8	38483.3	109051	53243.5	40662.4	33934.6	129766	11544.6	32621.8	1000	1000	18387.7	13088.2	46837.4	140168	123127	26405.9	24055.5	33416.5	13605.4	34785	28997.9	50900.2	33180.9
136.022@0.31	37103.6	59366.3	41819.8	22609.2	12784.7	1000	45640.2	90211.7	99801.5	81421	87376.5	89279.7	101756	89621.8	61730.6	89031.2	94220.8	93797.4	88277.3	83077.1	91407.4	77519.3	32382.5	80574.3	44320.4	93867.5	30827.8	87572.9	89520.2	64970.9	85873.8	87827.8	89206	16343.3	14583.8	65402.1	48045.6	18223.7	14389.1	85655	83896.3	98655.6	84633.9	89066.7	87168.8	97124.4	91457.6	61709.8	82696
136.057@0.16	97940.9	27618	25132.3	73399.6	13691.6	71466.9	18823.8	16546.6	19352.6	13000.4	19615.8	66417.6	20672.1	14395.9	20411.4	45016.3	16327	13296.9	47917.2	48872.7	50640.7	59209.5	65460.2	53243.5	51694.8	54425.2	45970.4	61466.6	17210.5	58184.8	60875.9	53948.6	57483.8	70556.9	44980.9	114974	60417.8	69364.4	78027	35986.2	45556.1	18894.8	17728.2	66456.7	46068.7	20169.9	42013.4	22154.7	18710.8
136.074@1.53	71022.9	44636.7	40817.4	59329.2	61346.9	25836.6	32461.9	12534.7	25731.7	34555.2	22016	23001.1	18457.7	21306.4	19024.4	22566.4	28953.8	24326.7	24000.3	22386.5	1000	23102.3	22567.9	29646.5	10316.8	10182.5	11677.8	13635.5	23245.1	40982.6	26339.8	38303.4	23360.6	297194	303448	263702	86938.6	88757.9	39290.5	80686.5	63793.9	52047.8	62671.3	77036.5	70950.9	54699.3	69144.1	39962.5	36198.1
136.076@2.19	7.1644e+06	6.97596e+06	7235918	6.91283e+06	8081730	6658969	7.39691e+06	7662839	7.23994e+06	7537454	7844032	8.01531e+06	6667010	6.86762e+06	6773245	6419877	6744899	6.03676e+06	5920384	6162812	6285930	5826733	6.15337e+06	5952478	5.98196e+06	6011934	6.32715e+06	5412882	5505300	5.41994e+06	5266438	6029440	6404379	8810996	9117840	9391780	8666776	9215364	9484409	8517604	9022060	9181024	8.24246e+06	8787078	8667879	7.91781e+06	8482337	8212735	7.64788e+06
136.076@1.98	1000	2296556	2475905	1000	2.56813e+06	1.96329e+06	2.07572e+06	2.61606e+06	2340764	1000	2.61951e+06	2511450	1.67741e+06	2.14815e+06	2.10403e+06	1625151	2.15227e+06	1.94016e+06	1000	1726342	2.03832e+06	1000	1.783e+06	1.78674e+06	1560283	1.78278e+06	1.89547e+06	1.37957e+06	1.54105e+06	1.68249e+06	1000	1000	1000	2.47643e+06	2881835	3.05111e+06	1000	2605512	2741190	2145950	2992757	3.06678e+06	2.29623e+06	2.67351e+06	2.66946e+06	2039378	2.73056e+06	2.73156e+06	2.07944e+06
136.076@2.63	71485.9	73221.8	69085.2	62892.1	61244.9	59387.8	58683	58728.2	60913	52718	59721.5	56133.1	18279.9	52480.6	45715.5	49086.8	53925.5	51333	42006.2	50762.4	28531.2	48039.4	46386.3	44242.9	43257.8	43812.5	43283.8	17857.6	45617.6	41247.4	36937.9	45921.5	44098.7	88156.2	77844.1	88392.1	72239.7	90245.3	86275.5	89282.5	82404	81470.7	73807.4	73548.4	77334.3	71501.2	82740.6	67899.4	73026.7
136.076@3.31	58844.8	61604.9	65457.4	58898.3	42551.3	54030.6	47055.8	51300.2	48321.3	27146.7	35973.6	41927.3	39290.9	37477.6	34751.9	36836.4	41025	43126.8	34768	35029.5	35439	37654	38092.3	33489.8	34133.4	31614.9	31898.5	37686.5	37828	32038.6	33120.1	33621.8	13722.5	89196.6	94225.3	87441.9	70369.7	71003.7	74465.2	70898.6	72267.4	65405.9	57804.1	61937	57325.5	54735	59521.8	59935.8	44472.8
136.076@8.23	55730.9	53131.1	57883.9	51744.2	21751.2	51126.7	45850.8	38302	28978.1	41034.9	32144.7	44544.2	43993	44624.7	33961.1	29213.8	28093.8	41823.6	38029.4	39723.8	36291.2	43222.3	43364.9	41115.9	24453.4	39887.6	39487.3	40693.4	42589.2	43050.9	37732.6	42442.9	37984.6	70438	77046	73656.6	65065.7	60187.5	60776.6	57765.1	66052.8	67446.6	54134.7	62655.8	59668.5	58881.5	58439.7	53148.5	56951.3
136.086@0.36	64507.2	72313.3	65646.4	571605	633290	627435	93040.1	38817	59253.5	42332.8	111562	75886.8	66799.7	79470	153296	49337.8	60298.4	431699	110421	99240.4	167142	44119.2	186282	50193.8	151150	81284.7	72366	84028.2	55430.9	166742	213651	188157	103470	42503.6	78122.4	73106.2	255734	588632	659021	70416.8	29565.8	36365.5	90708.9	41646.8	93163.5	47824.9	123133	89416.6	64237.8
136.087@15.42	38671.1	35548.2	96010.3	69975.3	112944	209748	86024.6	73164.3	182757	114331	132188	229180	116714	101200	334110	51633.2	222707	615739	261054	79345.9	147158	143060	52212.1	244046	407325	111326	74255.5	336108	158966	278909	118760	225898	583930	495217	350845	41261.4	227138	534709	61297.6	247995	129591	76990.6	155401	222677	156428	83506.9	238549	296849	158048
136.087@15.59	79421.1	136305	144528	279226	137317	74833.2	69338.1	82809.3	205485	332919	197956	267133	107657	241808	268689	126308	141207	326458	137510	113718	254250	280055	177503	244158	208541	168862	171050	195446	342755	450948	1.86681e+06	340533	192959	84021.1	179757	73929.2	192385	255777	63166.2	196315	212374	76785.8	251946	139069	146310	186232	244030	269001	178304
136.087@15.23	48072.7	52831.3	95558.4	99073.5	80464	56631.8	113840	155742	45536.1	151461	272721	47726.1	62561.5	138319	96613	180373	141116	59134.1	67605.1	43121.5	93204.8	238901	69356.4	167649	54897.8	132112	121727	151198	118976	156531	235581	86323.9	140406	130585	40555	98341	68595.9	149959	49649.2	129872	92024.1	81336.2	141870	94845	169742	72350.9	196828	197935	74200.7
136.087@15.99	300922	1.22869e+06	1.28733e+06	1.50745e+06	1.60651e+06	1.63651e+06	1.67095e+06	1.64694e+06	1.71727e+06	1.86042e+06	1.52542e+06	1803300	1.87003e+06	1.94441e+06	2.07413e+06	2.04657e+06	1.96373e+06	228303	140376	187470	1.9288e+06	2.11196e+06	1921609	73816.4	2224861	361665	2.14044e+06	2.1059e+06	2290541	119114	433427	121251	1092675	874353	1.00052e+06	1.41472e+06	1.60277e+06	1.13603e+06	333304	156672	1.69241e+06	326398	692321	343477	1.79214e+06	1.8182e+06	1.91231e+06	1.82809e+06	2.10082e+06
136.087@0.2	253218	220535	257695	397953	178933	366259	390544	337245	385888	403203	369671	374905	417423	422885	299837	294796	373342	162432	204968	385052	263795	431271	240760	381670	450642	424027	422177	532665	503489	347390	253765	287477	253242	145208	240384	119059	613142	153210	388348	378889	299556	301970	353060	336613	375428	387147	456890	400357	421744
136.087@15.82	953695	159502	84937.8	195262	228523	101956	159812	115116	252414	142704	270643	164634	125727	96771.8	374330	283282	141207	1.32235e+06	1.59605e+06	1.8908e+06	165803	233446	108588	2103300	420565	2.10913e+06	438080	128552	183373	2.27836e+06	151644	2.0294e+06	344376	51323.1	259446	152151	131585	346321	1.68668e+06	1.60706e+06	260985	1.75986e+06	1.17495e+06	1832642	178468	193314	161062	368353	391294
136.59@1.19	1000	1000	1000	1000	1000	1000	1000	1000	1000	1000	1000	1000	1000	1000	1000	1000	1000	1000	1000	1000	1000	1000	1000	1000	1000	1000	1000	1000	1000	1000	1000	1000	1000	1000	1000	1000	1000	1000	1000	1000	1000	1000	1000	1000	1000	1000	1000	1000	1000
136.931@1.44	93644.7	87786.2	37280.6	72560.1	74140.2	35470.7	70241	65691.2	31775.7	38661.3	69876.4	74778	39419.1	66183.1	41742	67767.8	71485.4	70529	72662	59587.6	69803.7	78973.5	75747.2	36601.3	71836.5	71932.9	71169.2	30053.1	43677	67960.7	36560.8	30100.9	29182.1	29124.7	18163.1	20903.9	18056.8	20473.5	26128	16050.7	14614.4	17802.4	23053.6	18388	23415.9	24692	18423.5	24656.7	21280.4
136.953@4.82	19313.6	23586.3	305825	30745.7	26550.8	29672.8	13986.6	29808.8	29749.5	34479	17620.6	14047.4	28756.7	382553	30230.8	30374.6	30247.2	25400.5	18174	35968.8	30133	30577	14992.8	30495.5	30114.7	30988.9	29734.6	13945.3	505072	22819.1	39214.9	42422.7	42829.1	1000	25896.7	29284.5	27109.5	24586.7	1000	28517.4	24410.4	10028.4	29264.5	32585.6	30527.6	31351.9	24417.9	334126	23035.6
136.953@4.64	363449	27371.9	14920.9	28652.3	28136.9	11862.2	28659.3	21147.3	319433	31938.9	24666.7	12192.5	33103.2	24450	346740	32937.2	31738.9	21588.4	16077.5	321497	33922	26947.1	1000	22644.1	29908.6	32131.6	11224.3	36163.8	40097.6	38567	41586.2	463637	44645.6	15198	27381.5	1000	1000	15215.9	308116	28235.7	302293	24328.2	29311	27211.3	30194.8	1000	11072.8	18364.2	30694.7
136.953@4.95	31609.2	308794	29425.7	30671.8	27345.5	24863.3	10746.6	29998.9	27246.4	29330	29752.2	368390	30041.7	23958	17328	389436	28600.7	34572	23954.8	38458.1	20043.2	393306	323120	29375.2	32793.5	31713.2	28524.5	18262.9	38188.9	41595.5	47946.2	42184.8	41543.4	289041	25758.3	23734.5	25864.3	22237.9	25891.4	33913.7	30792.8	33397.4	23664.7	33127.9	33163.2	376656	35339.9	30813	23337
137@0.33	47682.6	66007.2	56162.7	23098.9	53277.1	36446.1	42321.7	42033.1	16325.8	32768	18519.5	44819.6	57178.6	32670.9	41478.3	43652.3	47031.3	44992.4	42700.6	29194.4	26759.9	34136.7	28700.3	31198.3	44942.2	42186.1	42949.8	21697.6	18854.7	18234.9	14844.8	30471	20698.3	36122.1	55769.5	59538.1	31528.6	30724.9	39653.9	35483	33056	30982.1	14831.5	10237.4	25635.1	31818.1	21340.5	52959.4	27678.7
137.015@1.05	1000	1000	10105.7	15190.7	13390.3	11442	15201.5	18844.4	12820.6	13646.9	11410.9	13297.2	14635.3	15940.1	14719.4	24899.2	16540.3	14414.6	14164.9	11534.7	14645.2	13601.4	14422	10995	15565.2	23186.2	25319.5	17445.4	12224.9	15462.8	12728.9	12719.7	12326.9	10857.5	12750.6	11840.3	11791.8	11931.2	13909.6	23349.2	15356.4	13431.7	16745.1	18052.3	14440.8	12567.9	13623.9	16047.3	19554.4
137.048@0.16	54806.4	51173.2	57510.6	29128	33989.4	35571.3	38859	46316.5	19302.1	40212.8	34586.2	21988.9	42575.3	39377.7	42657.8	26688.4	37275.1	39043.7	28150.1	44398.7	44659.9	29717.5	34064.4	42900.8	30750.7	26074.4	39276.9	37660.7	35506.9	48463.7	48945.8	37399.2	50311.9	60082.8	25689.3	56466	30163.3	30059.2	38133.8	41698.3	20948.2	43411	36871.9	46324	25044.2	28373.2	32924.6	43643.2	40221.9
137.049@6.52	28622.7	29508.9	28043	13304.6	15569.2	23819.9	14942.2	10381.8	24219.5	30259.3	17730.3	29371.4	33786.5	31944.9	32106.8	48093.1	48420.8	48150	71074.3	68052.6	75259.6	83968.5	90932.9	88424	87802.6	94782.6	92140.2	97098.5	98659.6	98415.4	93334.4	100868	105278	35369.2	27651.4	30622.2	27945.1	35614.4	30280.5	41772.3	40548.6	35944.5	36667.3	33211.2	45932.6	53828.3	50371	50196.3	79350.8
137.051@1.78	44324.5	54725.3	55160.4	28004	48912.5	42618.7	18625.5	32541.3	46987.9	30551.5	18334.3	29751.2	33657.4	25701.7	40497.1	13501.6	13238.7	20530	25820.1	33374.6	33861.5	52233.2	62189	76722.8	439988	394897	413275	374515	438301	360229	1000	1000	562979	116119	73052	90363.2	334216	323364	291764	274633	286384	228110	70724.3	137002	41674.8	21099.7	44861.7	46004.4	25881
137.051@1.55	14004.4	13796	19060	12844.1	1000	27651.5	28592	1000	15910.9	1000	12190.7	1000	1000	1000	18285.2	1000	1000	12645.2	18092.1	26885.6	30553.5	37091.5	27183.1	45808.5	809618	857951	1141912	1.03465e+06	1.20004e+06	1.18138e+06	1.12008e+06	1.18945e+06	1.16883e+06	384334	419845	412415	945679	999983	986334	783575	874917	775946	336436	408646	117181	1000	17086.6	15530	1000
137.053@1.97	76366	83311.6	55428.7	57699.6	77142.5	67954	70225.3	74055.7	71433.9	51658.7	66392.5	68577.6	61178.9	45070.5	46809.4	52502.9	60944.5	53062.1	13487.9	55691.3	22941.6	69337.9	60857.5	63090.1	1.23456e+06	1.12234e+06	906268	1.30307e+06	1.13149e+06	1107145	1.62834e+06	1.69228e+06	1.66571e+06	661012	514162	461643	1.21123e+06	1.23e+06	1.05778e+06	1.01743e+06	1.04201e+06	792495	375428	400660	118692	23568.5	45949.9	70336.7	65666.4
137.058@2.18	36868.1	90476.6	206068	174332	212014	73120.2	182627	71806.9	87552.9	172291	83344.8	205622	168815	79957.4	74929.9	47564.3	76003.1	30259	179170	157034	161489	222425	154450	167324	92433.3	89214.7	96607.9	89472.7	94010.6	83421.4	95960.6	78970.9	101069	100491	74396.6	100650	98163.9	79085.5	55304.9	102192	98733.1	99032.4	93346.8	89738.4	40936.8	90869	52240.9	62213.7	80402.5
137.058@5.44	19347.2	11671.3	1000	23029.7	12952.5	26740.4	26482.3	14009.8	25308.9	25647.7	25365.8	21918.2	21552.2	21394.2	12971.3	16963.6	16634.5	23037.7	18420.2	24558.6	25037.3	14861.1	1000	23009.4	10044	17909	1000	10983.9	1000	15562.5	11840.3	19941.4	23188.4	1.55025e+06	1.57862e+06	1.49654e+06	170255	200267	17075.9	31499.6	30212.9	13053.6	16283.1	1000	11122.5	19055.4	29091.8	13663.4	24707.2
137.059@5.96	33819	34876.1	33026.3	26101.7	26040.4	1000	11275.2	17027.5	12335.6	10996.9	22435.8	17296.8	1000	11966.6	1000	1000	1000	22959.9	13040.7	14920.2	20604.6	14401.2	20916.4	18966.3	17870.1	19059.9	11716.9	16614.6	20571.2	14189.5	35897.5	19046.7	33789.1	39079.6	31342	34954.1	17975.9	23047.4	1000	23444.4	11386.3	21417.4	21181.5	17552	22009	18347.9	10115.9	20495.5	13948.5
137.06@6.1	29496.4	33490.2	31171.6	23093.4	15109.6	26530.1	25601.9	1000	18448.3	22123.2	22049.7	12142.1	22946.7	11704.4	11417.5	22523.7	19395.1	1000	19284.4	1000	20201.8	20329.5	13785.7	19706.2	17450.6	16399.5	19840.5	11207.6	1000	17198.3	1000	1000	15199.9	22924.3	28411.8	24266.4	23037.7	14977.7	12642.9	1000	1000	20827.5	20222.6	20840.6	16085.8	15240.9	18222.9	20425.2	17276.5
137.07@1.23	10854.8	11936.4	1000	1000	1000	1000	1000	10436.8	1000	22906.8	10857	33611.9	50290.4	37655.2	53197.4	68920	76433.5	79787.2	89187.2	98049.9	98625.4	77988.8	118117	116435	127765	130988	131958	130165	132728	140913	126584	137868	133223	1000	13398.3	12952.4	15521.3	1000	12820.1	1000	12365.1	1000	12459.6	1000	10331.9	39514.1	45731.9	54663	38997
137.079@2.19	497598	252854	536476	492237	311890	258942	317593	297562	270486	547563	547782	572431	266349	267694	257978	265913	268649	239155	257478	255728	446449	409922	426283	222900	250866	245105	239958	222854	211941	207282	248288	248408	286409	317735	337226	352533	363887	363697	351318	363921	342959	338823	308538	334885	337414	313602	313921	299828	305431
137.082@15.8	95904.9	22102.6	104634	49450.6	139947	153583	59422.1	168035	124515	156326	86975.6	158666	66076.4	215043	153383	83829.3	227611	197222	190124	81844.5	147352	107798	146622	44311.5	147037	105299	94565.4	242968	148952	98548.6	216769	138512	146917	46036.3	91745.7	86645.3	46591.6	132618	60179.4	94835.9	118905	72999.6	77989.1	81948.5	79684.6	204875	117888	87521.8	56642.2
137.082@16.96	75455.2	35666.9	109008	78723.9	165079	48110.5	117728	121117	174382	165061	68977.2	157652	72543.6	44779.5	45273.1	90717.5	181100	57180.6	119720	149843	147607	139883	109315	162169	117411	161295	102031	155438	195963	59820.5	129746	188884	143808	69760.6	100699	148478	52764.7	180596	158974	75847.6	126972	189732	137248	31305.4	164312	145820	147188	62307.7	147455
137.083@16.11	945861	615089	1.49141e+06	364933	879272	756905	922040	872870	711430	1.15124e+06	686694	878855	738184	1.16584e+06	1.80368e+06	1.22985e+06	1.59382e+06	1.04734e+06	452564	1.32838e+06	1.31432e+06	1.16941e+06	1.66034e+06	1388252	1.59307e+06	628072	1.36302e+06	1.48762e+06	1.17935e+06	1.22382e+06	1.3903e+06	1436894	426496	1.08864e+06	753180	1.23782e+06	737481	826924	1.53775e+06	651315	1.12951e+06	839177	1.13261e+06	1.14638e+06	1027543	971845	1.23673e+06	1.07038e+06	1335616
137.083@0.17	249169	216237	228187	428285	157480	446083	222729	216855	227000	279705	250852	142669	252951	179534	159480	251400	201583	229625	201430	119938	100862	73869.7	246486	113071	11232.6	96269.8	116193	427161	125184	141092	104632	121449	157242	198413	169693	193930	257606	385623	252710	258811	228062	178177	193300	281346	207326	282009	98888.4	216876	113860
137.086@0.36	40737.6	58826.9	84432.3	165607	81208.7	143843	63075.1	25743.1	48007.5	38828.6	39199.7	48519.8	68825	100630	40664.8	39109.5	46829.8	97503.8	89872.4	76981.9	83790.4	38852.4	57753.7	73342	89959.2	98740.4	41298	55715.3	33463.7	95294.2	141428	99362.8	120539	27391.1	52119.4	83354.1	121472	53340.4	85441.7	36697	21672.4	35930.6	74517.1	34015.2	48556.6	32518.2	68841.6	63390.2	44381.2
137.107@14.68	1000	1000	1000	10472.4	24033.2	11664	1000	18718	1000	18109.7	13268.6	29000.9	28411.9	1000	14163.9	17117.6	29460.4	14901.5	79178.5	19712.9	18078.2	15407.8	13070.5	12938	1000	1000	21238.5	60951.9	14376.3	12773.7	96476.6	1000	21192	1000	10010.6	1000	1000	1000	13459.5	18738.4	15370.7	17424.6	1000	10982.3	15109.2	13209.8	12720.3	15670.6	12234.6
137.107@14.56	1000	1000	10425	26669.4	1000	1000	60718.1	20486.3	1000	78850.7	16357.9	64756.8	23601.7	35360.9	64769.1	48940.6	70658.9	17675.6	15833.7	12547.1	10977.9	31299.9	21360.7	1000	105394	89099.8	12883.9	1000	38902.3	15784.6	1000	55305.2	14176.8	1000	1000	1000	18452	11269.8	29331.8	18615.5	15082.9	39423.3	46245.9	29305.9	71982.1	17329.2	18136.8	13262	24264
137.107@14.35	1000	1000	1000	1000	1000	11842.1	15960.1	13120.6	15520.7	10711.5	1000	19830.5	17537.4	11458.8	1000	18290.8	1000	1000	13178	16625.6	1000	19817.8	17854.2	1000	24257.8	1000	16042.3	41714.8	10987.5	11455.8	1000	14252.7	12740.4	1000	1000	1000	14338.1	1000	1000	26498.8	1000	1000	1000	12282.4	11275	1000	10251.7	1000	11842.9
137.107@14.18	1000	1000	1000	1000	1000	1000	1000	1000	1000	1000	15050.3	1000	19120.4	16229.7	24000	15943.6	1000	13960.5	36637.5	1000	17422.2	1000	1000	18584.9	25248.2	25522.9	19652.2	1000	19189.1	17459.4	1000	16663.9	1000	1000	1000	1000	1000	1000	1000	1000	1000	1000	21279.8	1000	1000	1000	1000	36605.2	1000
137.133@10.73	12780.8	26684.3	26528.8	19984.3	19519.6	18853.7	21048.5	18481.4	19686.2	20518.9	19061.7	19540.3	17691.2	18275	16686.4	18196.7	18899.4	17301.4	21538.8	22794.5	22416.6	20843.6	17058.1	20652.6	19991	18585.4	20339.2	86107.7	81674.1	82064.4	85638.6	81756.8	86101.2	26656.5	19885.8	28250.2	19569.3	19302.3	18368.5	19013	18108.6	22194.2	20049.2	20223.2	18456.7	16947	20904.4	28586.5	20241.1
137.133@10.59	1000	1000	1000	1000	1000	1000	1000	1000	1000	1000	1000	1000	1000	1000	1000	1000	1000	1000	1000	1000	1000	1000	1000	1000	1000	1000	1000	1000	1000	1000	1000	1000	1000	1000	1000	1000	1000	1000	1000	1000	1000	1000	1000	1000	1000	1000	1000	12377.6	1000
137.534@8.53	88086.3	95254.4	90759.1	82493.1	91783.4	88261.4	83040.1	88132	94004.9	81351.8	89171.5	86461.4	81835.2	81226.7	84115.1	79518.5	81800.4	82196.5	79053	83427.4	84589.9	75740.2	76430.2	81605.4	74738.4	80572.8	74827.3	65401.5	68705.5	69389.2	68242.3	67403.1	65539.5	83661.8	87196.7	91596.1	88512.6	82647.1	90349.7	86388.4	85294.4	84260.2	79913.9	81571.4	82411.3	75517.9	84864.4	79223.8	67767.3
137.534@8.67	1000	11908.7	1000	1000	1000	1000	1000	11684.1	32222.5	1000	1000	12345.9	1000	1000	1000	1000	1000	1000	1000	1000	1000	45319.4	1000	1000	1000	1000	1000	1000	1000	1000	1000	1000	1000	1000	1000	1000	1000	1000	1000	1000	1000	1000	1000	37860.6	1000	1000	1000	1000	1000
137.597@1.24	1000	1000	1000	1000	1000	1000	1000	1000	1000	1000	1000	1000	1000	1000	1000	1000	1000	1000	1000	1000	1000	1000	1000	1000	1000	1000	1000	1000	1000	1000	1000	1000	1000	1000	15807.7	1000	1000	1000	1000	1000	1000	1000	1000	1000	1000	1000	1000	1000	1000
137.988@0.34	219628	80307.5	81617.5	207258	263477	60472.7	60823.8	237047	89955.5	67326.7	114745	168127	289090	64835.3	67730.3	185734	132965	134042	166008	66885.2	103129	144100	97210.7	131485	57304.1	195819	99102.1	54855.3	89164.7	84257.8	17887.3	67814.6	94708.9	211577	125252	118247	223973	258550	222538	84827.9	205869	173888	67273.8	106744	154350	219310	67480.9	108255	113976
138.016@1.22	59008.7	66962.7	68466.7	59205.9	68387.5	55042.3	68708	67779.7	66657.7	60927.4	69343.1	62379.1	53338.5	53196.9	52382.1	37386.5	41505.1	34860.3	22952.6	24164.7	23775.2	13615.7	12568.6	18941.2	10626.5	12402.4	1000	1000	1000	1000	1000	1000	1000	36838.5	46241.2	48407.6	49394.3	45510.8	49712.5	39322.1	48939.9	46839	43871.8	46541.1	46002.2	45050.8	37644.9	46786.5	33310.7
138.054@1.15	28221.2	29565.7	32557.2	19243.8	21902.4	23595.6	20579.3	15191.6	16512	1000	22554.4	24007.2	1000	20742.2	22154.2	22535.9	15828	16669.4	15249.8	22056.9	16199.9	25741.1	14680	26266.6	18844.8	1000	17708.5	1000	16497.7	1000	1000	1000	1000	11624.7	33503.4	14064.1	31575	32403.3	33146.7	32204.8	15554.6	27502.9	36791.5	30958	34160.8	18695.4	22030.2	31127.2	35129.6
138.055@6.39	14330.9	14680.8	14621.1	22943.5	12136.9	20462.6	16558.8	17834.7	10799.5	19732.7	1000	10506.6	1000	18357.3	13292.1	13540.2	14435.9	12338.9	11659.2	20156.2	19904.7	13874.9	13065	14947.3	13134.5	13323.8	26619	14880.1	18938.1	1000	18561.6	13211.3	1000	24154.6	18290.6	21034.4	13815	23171.4	14489.5	24657.5	21342.2	19255.9	10728.4	21792.5	21227.6	14737.2	17115.4	15340.9	18979.4
138.055@1.32	134916	145085	170811	125418	137336	132099	162087	152966	146500	160456	170287	183477	183049	195756	191822	192895	199074	201399	206284	250884	222804	216752	225075	225559	242117	244284	240863	269905	280529	277597	271193	288774	284670	954201	973766	929208	921520	965379	977616	927296	931358	915862	916295	957318	896083	882595	914928	871971	855951
138.055@6.15	377503	383039	1000	400573	1000	423152	1000	483530	1000	446243	1000	458120	1000	453989	1000	402251	1000	416003	1000	429232	478416	394478	413533	1000	399949	1000	626525	1000	404256	1000	468831	1000	659285	336777	1000	370311	1000	401763	410141	429543	450052	470965	423802	472850	448588	1000	475168	1000	459503
138.055@6	1000	1000	432247	1000	435726	1000	457864	1000	484970	1000	480261	1000	452327	1000	461276	1000	411395	1000	384852	1000	1000	1000	1000	416729	1000	409397	1000	392799	1000	402968	1000	491155	1000	1000	358321	1000	379351	1000	1000	1000	1000	1000	1000	1000	1000	437897	1000	466910	1000
138.066@16.04	816304	500552	740694	798483	882113	944334	526438	812618	826872	835870	827642	880627	286595	995253	208878	848997	935803	990138	990707	234301	884166	255292	1.02728e+06	209149	211299	242658	209358	155993	414870	1.10308e+06	1.01508e+06	257595	326810	411521	814245	623338	831097	405813	269976	220217	917933	199794	193626	241329	947887	787591	1.01603e+06	847053	1.02414e+06
138.066@0.31	60671.5	45272.6	47337.4	40179.6	333514	164050	152234	24110.1	217413	158053	71081.9	125390	40947.3	171066	49916.5	36918.4	73510.5	74279.3	43533.2	61072.7	216110	35691.9	49358.3	73886.5	180590	60910	116082	186510	213754	323216	55808.3	36719.2	42739.3	33295.5	129000	68599.7	252362	259511	224883	207489	29443.5	42154.8	227549	160319	144588	38255	219575	31491.2	47806.6
138.089@2.04	1000	1000	1000	1000	1000	1000	1000	1000	1000	1000	1000	1000	1000	1000	1000	1000	1000	1000	1000	1000	1000	1000	1000	1000	1000	1000	1000	1000	1000	1000	1000	1000	1000	1.4274e+06	1.41724e+06	1.30654e+06	1.54905e+06	1.57141e+06	1.39815e+06	1.52722e+06	1578246	1.37187e+06	1484999	1.45543e+06	1.3249e+06	1.49551e+06	1.3929e+06	1.31868e+06	1.43248e+06
138.091@1.61	1000	1000	1000	1000	1000	1000	1000	1000	1000	1000	1000	1000	1000	1000	1000	1000	1000	1000	1000	1000	1000	1000	1000	1000	1000	1000	1000	1000	1000	1000	1000	1000	1000	599213	646898	610496	587140	622126	592626	555426	621183	599818	505039	598647	548101	473862	590760	522200	447528
138.102@15.93	657476	48181.4	30398.4	1.18284e+06	119490	174994	147069	146548	99067.1	286529	162472	286152	1.33544e+06	1.26706e+06	1.95321e+06	308794	148478	1.12273e+06	856298	139933	152500	2016359	187087	2.03014e+06	309567	97588.9	291313	1.9793e+06	285390	291312	302090	116016	272925	65574.4	150786	147601	58781.6	147754	812782	1.43178e+06	195937	581368	1.73249e+06	1755045	98636.2	156478	192922	143573	319332
138.102@15.29	38766.7	27555.1	89676.4	36555.4	79818.8	148183	133933	155656	43777.8	118310	80026.8	106479	81110.8	511532	188268	67182.9	57848.7	239512	101694	29462.5	165578	192929	202408	130602	170553	65964.6	286039	49984.1	227645	502949	418712	169401	361939	60195.8	35890.2	46877.9	51189.4	132295	53925.8	226678	92217.5	118277	239796	35334.8	184309	115848	58390.4	57849.4	87264.1
138.102@15.51	94285.6	110476	93244.8	67293.8	97056	322858	153623	200214	797155	219607	215215	71103.4	179835	59855.3	108188	219939	118889	478574	1.37905e+06	248112	313142	251793	56860.9	251506	312531	174526	124803	382811	225490	323663	725450	96881.8	119484	82367.4	86743.1	243183	71214.6	133574	526087	236242	142533	151910	191352	193524	115851	58906.7	1.87266e+06	239369	123811
138.102@15.72	108621	68137.6	106607	53008.7	132413	207773	1.47177e+06	81067.9	104121	1.71154e+06	1.26072e+06	337091	89488.7	328598	144389	370678	1.79399e+06	187590	125020	949246	273866	193339	1.79986e+06	161213	2.11606e+06	2101876	383525	345534	155590	1.25644e+06	210208	1.8465e+06	171451	872576	159828	541754	137493	103282	71400.4	98117.9	167404	981561	190357	126775	216066	277221	179000	141304	2.03404e+06
138.102@0.2	58107.2	70146	71719.6	185253	397691	178744	122144	212718	257539	292536	101093	268029	200593	256203	177628	86136.5	95971.9	140596	140927	301047	211714	138172	202441	267814	327962	325448	235844	42931.3	174134	246697	165279	186788	86444.8	43048.8	96515.8	36226.9	376592	93592.9	178671	125810	220248	98714.4	87523.2	68650.2	294027	96183.2	135685	200073	240088
138.103@0.34	41485.7	36422.6	53517.2	340282	134936	380908	51695	28256.6	87436.6	35077.5	57521.6	49307.5	86474.6	104652	148547	33332	37923	200153	105634	46182.9	122103	68461.1	129289	54558	129627	61571.1	89471	63712.3	31619.2	77184.2	195355	168321	442224	17491.5	34006.9	56245.6	148147	139859	404153	34514.9	25484.5	66978.1	59379.6	22218	43425.8	29009.6	60065.8	53652.4	46002.4
138.988@1.47	229749	255891	254213	203369	225478	223918	168104	161020	166835	79743.4	87571.6	85951.3	16935.7	19985.3	22153	1000	1000	1000	1000	1000	1000	1000	1000	1000	1000	1000	1000	1000	1000	1000	1000	1000	1000	196541	195937	187796	147588	150314	151127	90776.8	92541.1	86915.3	52277.4	59404.8	53002.8	25589.3	29449.5	28575.8	12669.4
138.995@15.47	59623.4	21324.2	54908.2	12428	21963.2	12825.4	45512.9	1000	1000	33472.8	47737.4	47691.6	22980.4	50756.2	44936.2	104900	64052	73126.9	30544.2	48496.9	20544.7	24400.9	38746.4	15678.4	1000	48047.8	148880	198733	26227.7	152344	232416	53433	196710	124286	57442.6	193047	1000	25249.5	85833.9	12733	17070.8	337731	20653.3	63268.9	12603.5	1000	26376.8	62832.7	57812
138.995@15.69	43391.2	142444	34280.3	58259.5	1000	21856.7	19705.2	17059.2	1000	30915.7	11511.1	1000	26351.2	106914	25336.1	28286.5	15736.2	26888.2	33836.5	22274.1	26292	16579.4	234808	23434	69857.2	20604.5	28514.9	80240.9	37244.1	29946.1	27249.1	47655.9	30264.2	33237.7	108597	42004.8	45805.8	1000	78019.5	13087.2	11845.6	104522	21969.9	11749.1	1000	43749.4	24693.8	16529.5	67905
138.995@15.88	66176.6	176173	72759.8	34732	32259.3	42853.4	46559.6	15915.9	19374.4	26527.9	25313	55940.5	52972.3	39404.9	35037.8	68443.2	43951.2	33016.6	1000	83113.8	47647.6	30912.9	75038.8	175449	63343.1	15983.6	34004.6	46249.5	70861.8	28941.9	42616.4	32302.9	49045.5	59518.1	101538	154697	44645.1	22130	419862	1000	12123	82173.9	188270	11669.4	38660.5	24165	42303.2	12112.4	28784.7
138.995@13.58	1000	14144.8	1000	37153.5	22305.2	235354	54546.6	52544.1	365367	17294.3	21242.2	18744.5	36050.3	15719.8	50072.9	27419.8	35045.8	41652.1	42857.6	48777.6	53146.2	52145.1	48148.2	26420.9	37699.9	32916.7	48148.4	372346	377215	62331.5	47605.7	60541.7	59248.9	1000	32762.5	22410.8	36105.7	45948.2	48059.7	47704.7	51662.5	23803.6	39601.5	51848.7	286546	53611.2	33730.8	48459.4	262481
138.995@13.32	21813.8	49872.9	32514.6	188575	39326.3	31712.4	49022.4	10650.1	41480.6	46480.8	293584	10129.9	351132	54939.5	309959	52212.3	49557.1	35672.9	22687.4	34275.3	317659	41908.7	50518.2	327603	48629.8	320581	48947.4	59891.3	58301.1	52634	60875	55709.8	65971.2	20510.6	23968.4	15795.4	17472.6	26129.2	36658.9	32955.6	20089	35485.9	51032.3	20149	25930.8	1000	54768	53980.3	49862.2
138.995@13.16	20193.9	40698.9	27517.3	14310.1	21794	50426.5	45094.8	330551	36644.7	294389	60734.8	295886	38248.7	345614	51664.6	47991.6	51933.6	358994	327951	300906	13909.5	294070	56009.1	47684.2	51238.7	33038.2	24544.6	60193.8	61084.3	411231	26954	61240.3	399234	17477.6	19367	17226	16594.8	269870	38188.1	323956	295635	50827	25115.7	39863.8	22217.2	56009.1	35437.6	291209	25322.3
138.995@0.34	1.15512e+06	1.19761e+06	1.32335e+06	747690	1.12797e+06	984666	229795	1.04009e+06	642740	592526	617416	868662	1.11253e+06	697377	886451	855415	992198	1.08079e+06	777206	563162	681005	644526	611503	668770	865537	875113	867179	421619	478875	469971	501007	550091	520148	1056005	1.46078e+06	1.29328e+06	494330	714911	933367	830788	935361	809496	636893	543480	651387	969467	154294	1.0831e+06	932853
139.002@1.96	1000	1000	1000	1000	1000	1000	1000	10046.9	1000	1000	1000	1000	1000	1000	1000	23434	19819.7	33973.6	72147.7	74982.8	41742.2	85619.2	47797.2	45966	37898	15024.5	34993.2	35596.1	11105.2	33306	16030.1	38106.5	33769	27072.4	38566.6	33497.1	41931	79092.9	24161.1	43246.3	36828	33956.4	45976.6	98453.9	89121.9	61268	110793	46021.2	62258.3
139.018@13.11	1.76792e+06	112819	83748.5	151147	133031	153161	92408.5	144429	64657.3	61392.6	2130454	146278	156215	158867	143099	171965	158074	157600	160197	163517	167698	157597	125639	157760	167420	170419	164762	157993	166763	158934	168866	182139	170390	119060	111060	136345	154013	146871	100714	158824	169140	152884	142000	152630	156965	160799	2233723	159714	142456
139.041@3.54	38280.4	16052.6	40579.7	20881.4	21226.9	1000	31388.6	32004.7	31793.8	26454.7	17739.3	32088.1	50879.7	53004.7	76709.1	95459.1	122780	83934.4	105952	131142	96520.8	115440	109680	136753	105998	127669	111046	133067	128063	148641	161994	133403	133964	19867.6	18863.6	36655.3	30809.6	11470.1	25805.8	29007.4	19918.5	26918.9	21979.4	19426.6	16518.9	23757.1	22951.9	30894	35874.6
139.044@1.46	26393.1	36516.9	42097.3	40484	11280.8	17077	29888.5	1000	29317.9	55218.3	12829.1	1000	10201.4	13856.2	1000	10131.9	17556	1000	14182.6	21576.6	19323.1	24600.8	29961.4	17340.7	43570.9	27506.1	23268.4	38437.3	48750.1	66570.2	39458.7	44827.1	50704.9	16686	100426	18988.8	1000	33955.9	1000	1000	26084.9	1000	1000	1000	38545.7	1000	16525.6	19703.7	15503.9
139.072@0.21	245737	97897.6	110271	266080	269105	447700	250420	179583	182070	227050	184895	250123	286970	305614	271990	347188	407521	56358.5	273674	258978	152777	246634	160988	240150	348717	70351.4	75898.8	475233	506636	733252	441848	437765	512985	231652	312014	152556	358136	464041	64325.7	190373	219010	160100	258399	272459	211921	260646	227887	244438	280330
139.074@0.37	240953	124118	143485	96349.3	575086	144289	85741.1	99184.6	181558	120720	168538	127896	114394	181753	145692	139311	180742	108177	167807	212865	129904	109323	180874	153631	153654	144106	199637	255706	148170	186668	168394	130644	163194	124424	171071	265969	130413	225729	169041	182864	94187.1	132443	195033	121376	139399	159623	151975	146120	172647
139.074@15.25	92276.7	76314.8	166232	465800	275433	66081.6	62423.1	119424	78848.9	61001.6	138074	43534.9	203887	488812	403486	217513	383289	354999	257154	78646.1	127279	206305	263827	161827	40147.3	79776.4	92348	73817.1	114784	193439	94999.9	344930	119779	263615	130205	61851.2	55521.5	96120	54444.5	94270.7	180130	166797	141260	78062.8	294104	404037	306167	60530	363435
139.074@15.41	135370	334989	108169	49303.4	233365	112671	352294	554086	82991.5	173810	495819	82597.7	242066	57538.4	112921	90852.2	94463.5	207506	466593	410062	407647	143901	407205	480968	1.22831e+06	503249	600046	338853	316279	250181	96044.9	474216	94712.1	56222.8	237495	96778.9	128985	431784	716993	88241.3	487217	733270	151996	675204	273805	208796	81226.4	90202.5	162620
139.074@15.61	283102	380982	154563	162385	360837	661278	419592	159211	55972.5	1.31983e+06	103574	200213	471164	115191	690499	82722.4	359682	93265.7	120815	560115	410688	135337	742804	93830.3	82030.9	456950	189092	204607	164226	931790	759452	378221	563657	156172	139838	489806	516640	663291	153477	767681	121577	154477	790826	164345	449278	562332	720499	886242	201216
139.074@16.04	1.05993e+06	827545	973142	865789	763995	763516	896897	483395	795706	1.08409e+06	1.18619e+06	2310243	776744	1.21143e+06	934160	2.22824e+06	1.57455e+06	1.33128e+06	951131	823745	1.02969e+06	913062	1.21036e+06	1091618	1.32072e+06	1355893	811496	1.6353e+06	1355925	1.31583e+06	1.22327e+06	1.00827e+06	1.24295e+06	970908	1.02781e+06	1.054e+06	634064	643936	1.29339e+06	758800	1.00885e+06	1171315	734845	744809	515753	1.28598e+06	1.11264e+06	714429	1.06004e+06
139.074@15.78	1.12048e+06	677133	1.20879e+06	1.01787e+06	145857	115753	506670	164371	1.2972e+06	94342.6	602645	64077.1	76432	1.00416e+06	383835	185118	225862	561667	167453	277128	297744	138786	95122.1	1.06345e+06	201978	85134.2	680125	422925	266153	343957	155355	354208	197989	1.13024e+06	934465	807502	413544	311405	570282	88576.2	1.02102e+06	412128	416003	1112873	403208	112611	424457	669210	538797
139.074@15.91	290546	108041	64615.2	196082	107248	773267	102205	152042	223970	185008	187579	180132	320377	125977	213604	276460	145028	131793	833781	318366	132504	1491964	174350	191516	126206	232257	453631	184409	118319	107888	447547	472636	1.10698e+06	144756	168569	109471	106464	153534	204515	119430	135555	169710	367821	178143	189716	86003.1	281982	178713	255544
139.098@15.57	1000	1000	1000	13557	1000	11331.9	14288.8	13543.7	54282	14181.5	18520.5	24377.2	63833.3	40723.3	29611.7	16638.3	39053	34618.9	26876.9	26406.3	125397	42919.6	26815.4	16100.5	45672.7	57177.8	24272.5	60779.7	29812	32636.9	36624.5	16540.4	52706.7	1000	1000	1000	1000	31572.3	1000	1000	14151.7	29077.8	20334.9	33090.6	57487.6	18662.6	42027.9	26253.2	24713.8
139.098@15.85	1000	1000	1000	1000	10590.5	11243.5	43961	49239	74345.8	37472.8	22769.6	31445.6	26402.6	33006	53541.4	167993	64536.8	41317.6	89003.3	31993.8	40155	40781	72758	45763.3	53307.7	44028.2	65260.6	78104.7	15969.9	60822.4	56316.9	14604.9	142575	1000	1000	1000	1000	1000	10540.7	32794.8	66878.1	59663.7	30214.7	73683.4	41376.7	46375.1	47446.7	62215.2	75879.3
139.121@0.18	17937	23222	24857	13226.8	25132.6	13074.9	25724.4	36833.7	29734.9	44505.3	33865.2	40573.4	45280.1	64990.1	57603.6	60396.6	55728.7	54487.9	54045.3	78069	60577.8	37045.5	44188.2	36632.1	44535.9	40680.8	34296.9	43826.3	16368	18439.2	23723.2	16054.1	40650.3	23572.4	15548.5	21063.9	24366.9	39460.2	33044.4	29562.8	36741.9	53438.2	47122.8	72418.8	39851.2	59421.8	37907.8	62163.5	24569.8
139.531@1.23	43706.4	34857.2	37851.9	34737.2	32573.2	19846.1	35240.5	25488.3	27782.8	32196.5	18849.2	22566.7	31696.1	34483.7	25363.4	35976.9	28963.4	24664.4	35372.7	26513.6	28564.9	22748.4	24712.5	20957.6	23942.5	23289.7	29680.3	25507.8	24752.8	21854.4	25131.9	16254.8	17740.9	15885.5	25245.6	24382.6	35947.4	22094.5	27746.6	27050.3	34664.7	24968	13693.1	26763.9	31705.9	32179	22110.8	1000	24594.6
139.531@1.44	52812.1	38614.3	37636.2	43110.2	63169.8	64452.8	54902.8	34639	32880.5	26060.6	24388.7	28247.5	27341.9	22747.2	19004.5	20127.8	17625.7	20799.9	1000	11821.6	11311	1000	1000	1000	1000	1000	1000	1000	1000	1000	1000	1000	1000	21873.1	21418.8	20470.2	21248.2	27041.8	20677.5	27318.4	30578.2	27813.1	23006.3	22362.9	24777.3	23802.8	11331	27126.4	15301.9
139.988@0.29	8396121	9317855	523961	4561558	5386621	5.11581e+06	6.62669e+06	6189541	5534210	5.41885e+06	5.20895e+06	6054088	6976458	5.90957e+06	6497011	6300786	6214801	7089285	5744101	5208188	5898123	5382318	5.96378e+06	5.65607e+06	6.07072e+06	6525653	6347693	5.12567e+06	5065483	4.89028e+06	5.35793e+06	5575035	5.37087e+06	8.04048e+06	8390935	7871826	5.002e+06	5255890	4539165	5.76921e+06	6280361	5691030	5.2729e+06	5.30896e+06	5.59933e+06	6140448	6011533	6.66055e+06	6.45096e+06
139.988@15.36	459146	767488	684326	609868	415045	315252	377596	559627	557203	552060	518835	533732	559718	459833	162854	516768	597713	582031	545290	653879	502799	260938	614917	535738	592108	564474	655672	700680	605239	624840	295055	575582	685630	271532	730016	696204	463502	170537	547832	472429	473236	392170	377907	636034	534520	220524	506169	352080	585642
139.988@15.94	599298	746917	686772	196425	347546	192398	447150	79617.1	175752	455344	412998	456643	278617	454613	279041	382694	450475	370227	72759.5	353515	240398	352248	404970	479827	473155	446751	405376	433501	574040	481784	494617	147789	442591	570236	136737	471528	475751	355719	218601	401683	326962	234238	379093	396061	212505	357332	221004	155690	486724
139.988@13.76	763399	754751	723741	631221	624386	5.87477e+06	6110200	6.19342e+06	6070658	5937629	5542684	629619	625176	619991	688995	663414	704534	6.09726e+06	607463	684361	636569	5.86508e+06	5.98908e+06	626600	641893	725762	694742	5.63777e+06	670916	6.39815e+06	6283203	6074106	729789	766414	694065	749395	722062	646138	690423	689309	647333	677001	644188	653494	635028	653808	682185	698240	699128
139.988@13.87	756492	727404	682896	615582	627331	671894	676668	711862	695670	642866	666944	666170	657500	665370	665682	706866	666261	684011	620958	639225	604532	683529	650024	682903	678748	678844	623454	757653	636655	709413	678329	680128	700196	765928	701916	704183	653470	623188	677448	692161	650387	618302	670050	656271	664114	634275	638219	692529	666494
139.988@14.34	729094	685250	665742	384648	601971	595135	550570	559821	564383	527760	536274	533568	568473	501962	531188	547237	561544	598794	591441	506437	536187	491944	634025	581542	504112	519435	529657	558701	562038	595628	573210	553315	491879	663339	712071	616071	566717	570835	598660	547732	622324	528096	546731	543217	541418	531440	573977	521634	545290
140.011@11.62	1000	1000	1000	1000	1000	1000	1000	1000	1000	1000	1000	1000	1000	1000	11553.2	1000	1000	11598.4	11912.2	13711	12955.6	14811.6	13907.6	15798	15331.1	16577.9	24876.7	22518.1	23847.1	26105.1	26621.1	27739.8	32258.2	1000	1000	1000	1000	1000	1000	1000	1000	1000	1000	1000	1000	1000	1000	1000	12015.3
140.059@16.09	216775	138613	335519	150212	336388	123473	111195	84652.8	198519	109333	131650	168104	203862	157043	155605	206301	186285	104496	50221	233286	96163.6	185205	259106	82103.7	223741	148922	125831	85335.9	63810.2	109716	43944.9	47735.1	91798	208861	202262	128431	75136.6	207880	201565	186512	197513	142658	166802	113271	163656	72239.1	55010.8	108527	76363.6
140.068@1.23	1000	1000	1000	20807.3	1000	1000	1000	1000	1000	20394.4	1000	1000	1000	19447.8	1000	10057.7	21583.6	16714.7	12004.5	14744.7	10923.9	1000	13908.9	10102.5	1000	1000	1000	1000	1000	1000	1000	1000	1000	4558851	4.3049e+06	4352638	3.7846e+06	3.72204e+06	3722273	3763044	3.7312e+06	3.73615e+06	3.55593e+06	3.63411e+06	3.57021e+06	3.55894e+06	3468671	3.50933e+06	3.23138e+06
140.082@16.02	1076073	2.74126e+06	4698024	1254364	2686938	3.05298e+06	2589667	6455827	6.74229e+06	6710051	5474840	6232458	1.23525e+06	6567492	6.50684e+06	5003940	6411875	6376964	6.80163e+06	6458579	6.64357e+06	1.29836e+06	6.66897e+06	4414630	5.94093e+06	4530767	6537888	4866935	2.98641e+06	6.64459e+06	6016432	2149960	6.40629e+06	1.45504e+06	4790332	1.42478e+06	3.03493e+06	4.08509e+06	1.71573e+06	6.16928e+06	4640724	6340277	6.71524e+06	4308689	1.70105e+06	4206666	7.03272e+06	6.5929e+06	1547529
140.082@15.27	409935	1.28531e+06	519513	567103	404289	199555	288183	400376	288971	379304	380336	152571	1717278	384973	621506	1.66274e+06	410113	225624	596361	92744.3	465204	321153	318475	759949	180432	653082	384886	858575	319202	381359	288175	928687	266353	774200	1.39648e+06	1.40633e+06	195106	431908	164282	692351	2.03498e+06	492796	291258	223103	1614839	573420	319220	146391	1.67615e+06
140.082@15.43	215728	1.82404e+06	295998	1778562	479708	520118	194293	641601	274683	740439	250673	249780	271592	168993	306875	245865	668873	226834	593242	746085	469504	704497	383835	2.51495e+06	749302	2.16925e+06	215407	295325	2.00485e+06	902017	177994	378493	246777	294563	337693	293980	1.93999e+06	2.32087e+06	231978	293109	322836	495731	911010	2.38886e+06	507584	2.5178e+06	299737	317457	455021
140.082@15.56	215728	312000	261638	435574	2966196	3.16009e+06	3.56346e+06	295407	219527	848241	607055	732746	382533	519126	650607	249531	393512	598040	623964	614760	541778	364622	599107	802789	570730	461220	590622	287891	721089	233082	680398	400013	499592	382312	620252	383980	1.41858e+06	508586	648377	690844	475140	1.01692e+06	910999	378796	419593	973555	370840	319352	214419
140.082@15.16	172676	186339	790822	215345	169074	141298	224736	287395	333146	503138	1.07848e+06	152571	324067	491260	438378	279690	215359	521249	559037	434448	281610	281769	257252	497868	238736	181040	187600	400141	218899	129360	249676	315801	185819	210270	232350	230569	159798	191596	413852	297513	270637	501861	350002	246449	325415	429236	217171	364004	188138
140.082@15.68	737174	299318	290868	267695	641692	620843	423505	523369	219527	385800	560872	1.05704e+06	427079	398144	825153	449763	765130	306445	558036	1.20416e+06	234261	913138	294978	346275	1.16521e+06	792505	277775	407408	393443	349819	982576	306992	588216	418927	514984	481519	465475	282654	4.80919e+06	735566	444765	1.11993e+06	684347	818425	801908	605785	251925	418667	400574
140.082@15.81	5421163	425311	267190	2.76773e+06	410246	606202	565411	340996	1.26547e+06	452669	898645	484101	600569	329719	322590	405226	1.07557e+06	400244	433383	542981	482365	725328	484695	923757	1.1787e+06	1.09932e+06	465737	563524	796257	247943	597731	2.80026e+06	472964	3.64727e+06	745475	3489424	264037	376314	540138	619133	791317	341825	350446	777964	3.32795e+06	332595	664276	829117	3.76131e+06
140.082@15.03	425451	230585	157411	196794	208077	169880	253325	159745	273920	304826	282157	287664	338290	344660	268594	300283	338798	426924	202131	289813	158332	271749	137781	281538	502181	374991	229922	128358	193054	127439	233839	623465	246447	100054	215505	140059	181752	121209	204713	273088	103255	152527	241359	280582	354706	126104	354512	224355	257187
140.082@14.85	89973.8	43179.6	206908	195111	144784	195048	223194	107870	222771	204740	153542	83052.4	42585.4	205779	136365	120933	169005	172865	162955	84816.5	72239.1	38125.4	106810	99860	348686	55257.5	178732	181067	68493.7	83072.6	207936	113196	124784	64230	64727.8	49062.3	119044	190646	48573.5	266548	76000.1	149252	144957	91561.1	118347	172711	73338.8	135399	149722
140.082@0.37	392640	867716	787596	1.05945e+06	1.41811e+06	1.43222e+06	236699	228703	340673	205263	363881	890310	262370	338343	904007	237352	328045	207100	1.03927e+06	1.02254e+06	900751	195124	932270	236923	1.0065e+06	918624	964905	395762	232178	455631	301362	234716	271941	202558	298491	441654	237032	1.59193e+06	1.50226e+06	956457	176049	205520	985723	208909	883600	293253	960224	899519	952774
140.082@0.21	574487	254454	300882	779668	154750	739517	564081	533632	518702	488152	422857	453980	439614	619247	344624	691711	622162	446623	441989	315543	400620	629466	577283	412618	590695	359989	465463	749483	744222	888598	732698	646758	803777	442042	641068	554404	705967	947894	869672	491350	574335	571399	550700	594849	473142	594284	444776	268484	419518
140.118@15.28	1000	1000	1000	11128.9	20794.2	10740.3	52057.8	36467.8	30279.4	42572	40083	30008.7	30730.2	66168.9	32970	44091.3	49739.5	27482.1	31408.1	90888.4	31673.1	243272	48046	19062.8	69166.4	34696.5	188061	39546.9	75644.2	102729	35029.9	61294.6	146888	1000	1000	1000	1000	1000	1000	60291.7	47485.4	23126.6	39504.3	33202.3	20756	43400.8	12342	51972	111701
140.118@15.42	1000	1000	1000	166523	28186	18601.4	28155.2	47118	50939.5	34400.6	35413.1	107197	33057.5	49536.8	56280.2	19786.3	47879	134951	61163.6	38489.5	59777.7	54809.9	149077	47032.2	114194	359411	73678.2	156587	102977	261771	24038.8	46063.1	45404.1	1000	11215.6	1000	24323.7	27274.2	29284.8	54176.5	40783.7	32915.7	94402.1	37807	174151	100286	34179.4	63011.3	62845.7
140.118@15.15	1000	1000	1000	1000	1000	1000	1000	1000	1000	1000	1000	20346.8	37284	45375.8	25806.8	22736.1	44315.7	37275.5	43157.1	56136.8	25155.1	20180.7	32380.8	38845.7	47690.4	44366.2	55621.9	26710.8	55617.6	34658.4	91109.4	48547.6	28208.1	1000	1000	1000	1000	1000	1000	13746	10039.3	14576.5	30074.2	20953.9	26105	21008	45804.9	26036.2	29096.8
140.118@15.56	1000	1000	11914.1	50808.7	33598.8	13345.1	29702.1	33246.9	58489	59626.3	58388.7	85185.8	75442.8	124767	117768	53793.5	34121.1	57944.4	49324.9	46698.2	82579.7	124699	38657.7	44182.8	79796.4	190066	84107.3	73855.7	96610.5	100425	78193.9	76651.7	246453	1000	1000	1000	178336	46494.4	29633.2	30995	59734.2	112664	28568.9	40769.7	40163.8	52865.5	130563	63215.7	28781.8
140.118@15.7	1000	1000	1000	56312.5	20821.1	25778.6	33167.4	76749.4	95514.3	50855.3	86987.9	490136	83296.3	50289.5	83086.8	90149	51205.7	58052.3	64814.1	82552.9	77543.3	450767	98718.5	89352.9	116157	43770.3	169514	780862	146786	47398.4	94764.8	107233	46514.1	1000	1000	15881.7	26359.8	50212.2	22124.5	38402.7	62750.8	317056	51406.2	59764	26631.9	44205.2	55713.6	441718	79807.3
140.118@15.86	19176	1000	1000	30090.8	29101	27815.4	33546.8	244206	41948.2	60843.9	99199.4	54838.7	433444	39120.9	73427.1	111719	27814.5	130196	159258	38752.2	127305	124866	68537.4	82037.6	80006.5	62426.5	80633.6	91825.2	75778.3	501320	53482	41345.6	51651.9	1000	1000	1000	33799.2	32490.2	66383.4	118949	98205.2	120547	87963.5	30526.9	49985.2	77686.1	70548.4	104576	54819.2
140.118@0.19	15186.5	10921.3	31317.7	55555.9	29060.3	52114.2	34149.1	65304.6	17542.7	32176.4	42325.1	25272.8	43623.6	35257.6	64990	75289	30106.5	39735.5	53409.5	34760.3	79711.5	110243	62179.3	50686.3	77664.1	63881.3	42673.9	39887.5	34309.6	64182.3	26341.8	62911.7	15641.3	16980.7	11051.6	23014.3	55095	55707	56693.7	15516.8	32048.7	53012.8	19905.1	32774.3	41780.6	43401.2	31116.8	21087.9	39574.4
140.534@1.05	1000	1000	10118.7	10183.8	12677	1000	11058.8	13300.4	14656.7	13055.5	12758.7	11114.1	13021.1	12577	14414.6	12806.3	13984.4	15341.4	13730	12578.4	15223.7	12230	15799.1	16894.9	15598.9	15481.5	18324.3	14791.1	16062.7	17339.8	14246.1	17582.5	15866.8	15773.8	13335.4	13029.5	16622.6	16185	13194.6	1000	23007.8	19992.4	16818	20855.8	21175.7	21497.5	21650.1	21537	22266.5
140.951@0.33	98600.5	127647	39367.8	88646	123611	117120	92402.6	96092.9	17246.3	57861	56185.9	88788	123345	74384.9	100720	95536.4	115004	116666	87782.5	73742.1	69482.4	80278.9	77078.6	75599.7	96280.7	81112.6	105257	41893.9	49546.2	49355	54339.2	64565.4	49442.2	95817.9	140505	133912	109807	113520	93961.6	92757	93595.8	69085.9	86455.3	19646.2	57328.3	88249.3	88353.1	106750	117025
141.079@0.16	113983	74452.6	85761.7	93102.7	70181.3	75530.4	56282	77885.6	48126	60042.3	64383.8	51849.4	89063.7	66095.9	62499.4	70156.7	65376.3	42654	60456.5	90706.9	81323.4	50352	58380.5	72026.9	74684.8	47928.8	90583.7	68767.4	54926.2	61143.8	83330.6	63506.8	75119.5	64548.5	52936	92850.8	62761.6	112921	101856	61843.1	76546.9	67494.2	61606.4	75957.4	61948.7	65622.6	64766.8	66950.8	58199.8
141.085@15.84	31373.8	34481.3	1000	33471	11756.3	25225.4	31224.1	15909.8	58520.5	43202.5	36144.6	26881	40794.2	33590.7	23662.7	36333	22186.6	34077.5	41540.8	29787	17985.3	14229.1	23003.3	43851.7	39508.5	29094.5	46728.8	24106.9	18194.3	21368.4	128192	25711.2	29772.3	11184.4	12318.9	16932.3	26123.9	11485.2	1000	31692.3	101930	25082.5	32497.4	81600	64298.6	65624	29213.1	55403	46002.2
141.085@15.68	20496.1	10468	1000	15783.6	18957	34653.5	10481.9	26656.8	1000	49911.1	36493	14651.3	24346.7	34394	16517.6	33015.8	36459.8	17768.7	125378	29122.9	50468.8	45913.7	12334.1	18817.6	69442.9	14368.2	22710	59067.3	13589.6	27520.3	16827.4	32633.1	22709.4	19017.6	1000	23610.5	44767.5	17432.4	27174.2	1000	13820.1	54870.6	1000	69931.7	32678.1	19288.3	15789	25512.1	12629.2
141.092@4.58	23232.9	20964.3	1000	11489	14913.5	13872	1000	12414.9	20560	14182.8	1000	13564.1	20364	14385.4	10249.4	15876.4	1000	1000	14556.9	17524.1	13244.8	10313.3	12488	13732.5	11667.8	1000	15410.6	14086.7	1000	13894.2	14375.3	1000	16566.3	17344.8	18646.3	18524.7	1000	12310.9	1000	19176.2	1000	11793.5	18043.7	14084.5	14653.5	13604.7	10966.7	19285.8	16352.2
141.959@0.7	411384	472727	438109	402420	398062	406006	360968	403013	382907	355942	419709	320697	337429	373531	378363	375747	390308	385198	430697	354396	1.19252e+06	373560	378345	361653	293968	383124	389383	404737	343842	399416	352968	411550	350137	416073	535520	430900	456303	407531	350834	391287	395431	389441	397708	380748	383747	360242	370045	396823	375095
141.959@0.8	453090	449302	447518	390346	389486	397745	368108	377416	387309	361791	393098	380608	365243	392314	379605	392703	380749	368840	423742	353123	441495	389073	358901	358436	365152	348474	388894	393867	413199	414257	366548	361047	356144	425362	440142	410213	433825	393609	403882	406816	403752	374989	397705	385787	384311	386883	388920	342220	400555
141.959@0.97	445430	453844	431988	400119	402649	400258	380452	262615	405832	374628	404001	398413	284559	283401	270984	361802	295891	373353	382331	269160	464019	345224	355064	344618	348806	374898	386437	301058	405753	402765	380084	401263	394040	414524	426841	325734	400657	379020	372970	310554	378271	378709	374769	371562	353967	391100	372505	367858	380736
141.959@0.34	461246	454896	329731	295336	327726	409221	121431	367060	255487	213994	233726	321437	334585	273711	344377	299245	335997	352397	259780	227865	275571	259116	262348	227735	343106	256132	325916	122779	143014	157268	38468.7	185777	31338.3	393008	497924	439343	325637	402375	397601	377120	357985	269624	249165	200765	248001	278614	63902.3	360082	343763
141.959@0.18	192678	226949	135794	146660	327995	190107	191247	171660	76388.9	50141.9	87769.8	89232.6	160855	97258.9	49787.7	105156	154040	147023	90511.4	37892	68630.1	73022.5	47134.3	1000	85008.3	99483.1	69662.5	1000	21692.3	40265.2	30242.1	40946.3	11774.3	157805	253216	214024	192150	293789	202859	194580	103284	62933.6	53694.6	64379.4	40433.3	111487	115165	150736	98506.5
141.983@13.83	284757	250820	267756	235811	267666	228961	279405	2.29426e+06	266891	257651	242188	232226	230804	2.24265e+06	241149	259682	236976	2.2152e+06	219490	260795	250404	2150755	242677	262985	260129	240189	260689	2.10922e+06	277390	272124	279668	265446	269917	231964	30927.5	258219	231613	255856	232095	256711	2.06499e+06	237059	243761	2.14527e+06	2.11758e+06	241464	250258	240914	132996
141.983@0.29	3.22384e+06	3.54925e+06	196166	1.75069e+06	2.07886e+06	1.99075e+06	2.51424e+06	2437197	2.11148e+06	2.0882e+06	1.97605e+06	2.28225e+06	2707696	2.27842e+06	2.46467e+06	2.35843e+06	2.36139e+06	2738230	2.18582e+06	2013970	2.27154e+06	2.05654e+06	2294833	2.19118e+06	2.33651e+06	2.54552e+06	2.41114e+06	1.92124e+06	1.94611e+06	1.88876e+06	2.026e+06	2165150	2.05182e+06	3.02701e+06	3202966	2.98074e+06	1884852	1.97913e+06	1.76536e+06	2.22539e+06	2.38144e+06	2.40359e+06	2.02296e+06	2.03287e+06	2.09498e+06	2.36971e+06	2314035	2.51786e+06	2.48648e+06
142.026@1.23	1000	1000	1000	1000	1000	1000	1000	1000	1000	1000	1000	1000	19877.7	11515.6	16006.9	30005.2	27992.1	32212	35032	35792	38631.6	39868.4	40223.5	39049.3	51424.3	51379.4	57035.8	52179.1	52975.1	55852.4	56342.2	65582	61405.1	1000	1000	1000	1000	1000	1000	1000	1000	1000	1000	1000	1000	13469.2	12372.9	1000	28657.5
142.035@1.06	1000	1000	1000	1000	1000	1000	1000	1000	1000	1000	1000	1000	1000	1000	1000	1000	1000	1000	1000	1000	1000	1000	1000	1000	1000	1000	1000	1000	1000	1000	1000	1000	1000	1000	1000	1000	1000	1000	1000	1000	1000	1000	1000	1000	1000	1000	1000	1000	1000
142.047@1.21	228583	241214	240066	236557	260416	238169	247686	268065	250727	286640	295872	281069	310862	326619	333716	356386	355425	339396	353762	365641	379500	387118	412788	390179	411014	419957	428536	428514	472157	444160	422106	467201	453144	226569	216356	232727	219043	229565	247450	221143	230431	247714	244778	259828	245887	262572	275510	285537	271319
142.065@7.2	187077	198541	211309	181391	203502	204720	187066	203555	197984	182388	190585	195212	176729	182657	185779	166318	168842	175745	162678	168537	171528	162127	168979	176415	166383	167697	170525	162216	171761	173789	160904	178453	174596	206992	204588	222673	188811	217314	218912	203986	216916	206828	192129	200718	209544	192198	210727	199142	190654
142.097@1.06	72690.1	77432.1	69416.9	71539.7	69723.2	71901.8	65173.8	71725	73057.1	63214.8	71899.5	64813	71546.5	67824.5	71669.7	66210.6	75385.3	68911.3	60852.6	65195.3	68595.6	61367.1	64888.6	65733.4	66354.2	66838.8	60748.6	73896.6	75961.1	70418.8	80127.7	79636.2	82277.9	62321.1	74383.4	74314.3	60743.1	65161.1	59633.7	66523.8	62441.6	67621.3	73081.3	63799.4	73107.9	69335.1	64484	60551.8	65437.1
142.097@15.4	1000	1000	1000	13690.9	10465.9	17630.5	1000	23978.9	16539.9	15746.2	24336.1	11602.7	35311.8	54694.4	71954.2	35645.4	38514.5	49140.6	19254.8	24821.9	16285	39443.2	20991.7	85739.8	50401.1	39868.6	30707.3	383444	40897.2	45333.3	20889.7	19617.3	73273.3	1000	1000	1000	25963.7	15242.2	10031.8	18555.1	34051.5	34901.5	15372.8	1000	37099.3	41659.8	21872	49512.2	22926
142.097@15.55	1000	1000	1000	16940.1	17426.6	11326	72392.2	40672.1	30183.3	19840.8	25166	70171.9	46497.6	47144.5	34990.9	18757.2	13406	132547	81674.2	24088.1	40375.9	62057.4	23974	53446.7	120826	35271.9	51671.2	36380.1	28644.3	62281.4	37169.9	26259.1	108505	1000	1000	1000	1000	15242.2	10031.8	91779.1	33061.2	31719.7	15043	32102.3	39201.3	24304.4	33845.8	30535.7	92345.4
142.097@15.73	1000	1000	1000	28391.1	21708.6	1000	43594.5	34673.6	32830.5	52318	122103	37828.7	17124.2	24470.5	46853.6	36125.5	32078.9	43125.3	99817.4	52427.9	281586	57061.7	31965	73646.7	50899.2	180903	26579.2	35463.1	64325.8	172852	25678.2	60770.2	41564.1	1000	1000	1000	1000	20960.5	64112.4	36000.1	44859.2	95112.2	47739.9	30652.4	64329.1	42832.7	20616.1	32822.8	91686.8
142.948@1.26	324508	351581	356098	359472	419941	399697	417434	437577	420113	444962	444867	454628	457811	472529	480794	477529	502057	471862	501880	538533	530566	522554	544036	555368	586845	573112	626620	656025	674007	674674	685929	734748	732882	250645	264412	267364	303963	307955	328934	305191	323274	316075	310908	341173	367848	340285	362199	377921	355662
142.967@0.46	1000	11092.2	52723.4	73970.2	65434.2	75843.8	78264.2	53773.2	66005.8	37261.2	35058.9	80758.2	37153.2	73135.4	71653.2	53973.2	74702.8	73347.2	76035.5	85405.6	77146	40719.8	67999.9	74681.8	80304.9	83725.3	91431.6	91022.9	84023.4	91919.4	82973.6	75510	76558.8	51809.4	68208.5	76089.1	69068.8	68377.8	62773.2	18210.8	57810.7	47194.5	78109.7	65027.8	54856.2	59457.3	71279.4	57575.2	80480.8
143.039@1	17139.3	15205.2	11242.2	1000	1000	11775.6	1000	10417.4	14822.8	14235.2	12522.9	1000	1000	1000	16075.1	13178.3	13261.4	16869.7	1000	15433.1	15313	12119.1	15700.7	14165.8	17245	15550	11596	13001	12951.1	11447.9	12616.2	1000	11470.5	12431.1	1000	12470.6	11536.1	1000	14211.2	12631.5	10943.9	13027.3	12533.4	11311.8	13389	11336.8	11666.7	15839.3	13791
143.073@7.2	223745	235972	249577	230227	248991	241819	233410	248104	237946	236216	235271	224103	223070	233372	219632	213836	214025	217030	198161	203291	203438	199255	203562	199626	201560	206913	208986	207379	210740	215436	198347	213035	222347	242682	250542	259838	246408	260136	288875	241892	262203	252974	232990	248379	258060	239673	252385	244597	223310
143.081@2.91	1000	1000	1000	1000	1000	1000	1000	1000	1000	1000	1000	1000	1000	1000	1000	1000	1000	1000	1000	1000	1000	1000	1000	1000	1000	1000	1000	1000	1000	1000	1000	1000	1000	52283.8	62051.4	16191.6	37424.7	19057.8	1000	59229.5	59812.6	43628.2	49377.1	54423.1	43554.7	36775.4	55229.2	1000	44079.9
143.082@1.43	27410.2	22797.4	24695.1	36493.2	38749.4	26755.1	24699.2	20115.6	20497.5	22143.5	19203	17078.3	16370.5	21174.7	17762.8	14382.2	13635.4	13792.9	13753.6	14161.3	15575.3	14669.3	14348.5	14072.3	15377.4	16379.7	15017.6	14760.1	18125.6	18253.7	13599.2	1000	18550.8	36922.2	10323	33319.6	39339.9	40649.3	38208.4	38144.6	32754.9	39737.5	42735.8	22411.2	34862.6	41726.1	31340.3	32082	37736.6
143.112@5.39	1000	1000	1000	12068.6	1000	1000	13297.7	10709.5	20241.3	1000	1000	10553.9	1000	1000	11191.5	1000	1000	11850.2	11083.6	14210.5	1000	1000	1000	17602.6	1000	1000	1000	1000	12304.5	1000	1000	1000	1000	64378.7	73119.2	65983.8	36115	77187.7	66160.3	62460.3	66126.9	55973.8	14747.6	65096.6	58749.5	55091.8	56676.7	43278	45601.4
143.594@1.07	1000	1000	1000	1000	1000	1000	1000	1000	1000	1000	1000	1000	1000	1000	1000	1000	1000	1000	1000	1000	1000	1000	1000	1000	1000	1000	1000	1000	1000	1000	1000	1000	1000	1000	10064.8	1000	1000	1000	1000	1000	1000	1000	1000	1000	1000	1000	1000	1000	1000
143.959@1.05	66408.9	69398.5	98312.8	85126	82905.5	83561.1	108851	83811.7	85382.1	119639	72829.1	91414.7	69614.3	75749.6	83604.7	81695	100246	80300.2	111549	89712.6	98260.2	87036.2	94945.6	81431	77498.3	82370.4	83277.5	69139.7	73830.2	82416.1	75917.4	66437.6	95194.9	188096	179221	71554.8	182037	80991.7	80874.1	94315.6	95855	79937.3	76466.2	74154.3	76713.7	72229.5	93599.2	118763	77899
143.959@3.03	38542.6	31683.2	36099.7	28559	31081.2	32196.1	23036.7	30052.8	17204.2	25516.1	33806.9	31188.5	26971.7	33783.7	29200.6	14844.9	24256.8	27223.2	28682.6	14805.3	28150.7	29840.4	28959.9	29416.3	1000	29674.4	29631.9	24314.3	45163.1	38842.8	41331.3	42538.6	40798.9	19867	19042.7	23380.9	31170.3	30004.4	31087.8	30658	11697	30196.3	31477.5	31322.4	15344.3	13623.7	26658.3	27561.3	20197.5
143.997@1.06	289388	249068	265250	250695	266207	236070	220974	284247	218547	210467	211742	216415	199178	205521	207760	262465	202408	216166	246733	193485	204340	207435	228126	201423	215670	273066	459497	217354	229013	276572	221349	211617	226841	305477	279546	321689	303052	286704	508493	260292	278956	264439	226603	263539	270489	238719	247991	235056	239406
144.045@7.2	34365.8	44872.4	40281.3	38738.5	45411.5	41338.1	37686.3	36982.5	41084.9	35797.6	35350.3	39794.4	35735.3	36611.9	32522.6	35365.9	35521.1	33645.1	30431	33025.8	34675.7	29733	36150.2	36085.7	34609.5	31538.9	32821.6	35012.1	34727.6	33589.7	32572.3	40006.8	34933.4	43661.6	43529.4	47803.1	42386.7	39023	43867.6	40936.7	40052.2	39860.6	44299.9	45675.3	42740.1	38120.9	42959.4	41559.8	41532.1
144.065@1.27	481851	755506	481769	527234	559213	773720	559707	514069	713151	439317	424311	436169	350788	354917	501360	391920	285839	273505	214331	236669	213544	151687	168254	166754	147010	130070	155943	152204	151375	157665	150182	147355	155407	571531	565532	578313	734744	606863	647324	553054	586520	606628	523073	565686	532208	461833	477600	462287	425972
144.066@1.97	35554	80894.5	59717.1	66028.3	74635.6	69713.4	66597.5	72936.1	46268.4	61488.9	63178.9	29177.6	47507.8	16060.3	25611.8	47738.8	17004.1	27492.7	34059.3	41165	1000	10384.8	21237.8	28951.2	11254.3	1000	12059.6	29504.3	12587.7	21159.3	34086.2	32390.6	36669.1	40190.6	87066.9	90271.3	79114.1	81332.6	56482.8	73379.9	84495.1	91354.1	80078.4	74014.1	80733.3	73540.6	85158.7	76485	56059.4
144.066@1.58	124756	123958	130051	100500	117351	107979	40640.9	112088	98267.5	93827.9	83376.3	97796.1	72075.5	54191.7	85499.8	57618.8	68633.1	61515.5	31891.5	34655.9	56562.9	44727.3	36965.3	48635.8	25290	48642.1	50897	43071.5	48510.4	32327.6	1000	12868.6	49505.7	85993.1	107027	132152	107999	120233	107188	121241	121462	119888	109486	111235	117430	99925.5	115623	103012	102967
144.066@6.12	12775.7	1000	21918.3	19186.7	12229.6	1000	20195.7	1000	20172.7	1000	14028.7	17644	1000	15351.5	10783.5	1000	1000	14874.6	1000	1000	1000	10267.8	1000	11664	1000	1000	1000	1000	1000	10214.4	1000	1000	1000	13992.2	20426.3	17466.2	24023.3	13067.4	11709.5	14533.9	15428.5	17138.2	11456.5	10192.9	17989.6	1000	1000	21122.9	14386.1
144.066@5.43	1000	17474.9	27039.1	10193.2	19801	1000	1000	1000	20939.6	10496.1	10255.7	13484.1	1000	17095.5	1000	1000	13192.7	1000	1000	14047.5	1000	1000	1000	12670.6	1000	1000	1000	1000	12470.9	1000	1000	1000	1000	24690.6	25911.3	37322	26868.4	10375.9	21020.4	37766.1	45752.5	41162.3	39648.1	39534	29306.3	41213.3	30721.4	42428	32367.9
144.078@8.56	10752	17267.1	14499.4	14563.8	15098.1	1000	1000	1000	14726	1000	10755.3	11394.9	12225	1000	13218.1	1000	10997.2	1000	1000	10206.7	12265.8	13064.1	11278.3	10691.7	12347.9	11231.7	1000	1000	12646.3	1000	12422	11124.6	1000	34128.2	34442.1	28448.2	36153.7	32887.5	31361.2	30943.7	36344	34114	34983.5	35122.2	33276.1	33776.2	36329	32390.4	36282.6
144.081@7.2	1.73387e+06	1889944	1.93329e+06	1.7813e+06	1.92978e+06	1.9076e+06	1.75212e+06	1.90252e+06	1.85297e+06	1754629	1818754	1.8183e+06	1.65384e+06	1744852	1.72124e+06	1.59576e+06	1635428	1.68358e+06	1.55538e+06	1.62557e+06	1.63576e+06	1.56143e+06	1.62549e+06	1.65582e+06	1.57389e+06	1.61868e+06	1.6361e+06	1.54977e+06	1.64689e+06	1.5939e+06	1.48715e+06	1.6369e+06	1.71235e+06	1907939	1.96456e+06	2.0505e+06	1.87789e+06	2.01888e+06	2083130	1.90737e+06	2.03875e+06	1986564	1.8128e+06	1.97188e+06	1.9686e+06	1.84315e+06	1971304	1.92327e+06	1.75981e+06
144.102@1.37	12892.7	11601.1	1000	20107.6	1000	13915.2	1000	1000	1000	10198.3	1000	1000	10468.1	1000	1000	1000	1000	1000	1000	11191.4	11067.2	1000	1000	1000	13549.6	1000	12692.2	1000	1000	1000	1000	1000	1000	37769.6	38366.9	31118	37652.8	38521	36380.8	33909.5	35984.9	36539	32543.7	36479.8	33803	42185	30520.6	32894.6	33626.2
144.102@9.73	17118	19802.8	1000	19042.8	1000	22980.6	32397.3	31805.2	29337.2	22667.2	98779.7	85424.1	22060.7	30523	116875	90987.9	114010	93993.2	105823	30960.8	104799	107887	105779	110605	120599	132169	109766	112335	114948	111857	123425	122852	121633	23051.6	27834.6	28976.6	29262.6	32961.5	33202.2	20353.2	30230.5	30283.2	86792.6	37787.2	34413.3	31939.8	29506.9	25763.9	36875.6
144.102@3.52	12823.7	15062.2	18099.5	18407.2	19867.5	10915.3	19334.8	21108.8	11035.9	13094.8	22225.3	18735.2	22377	20473.6	21982	21261.3	1000	15714.6	15463.6	20550.1	1000	15475.9	20895.4	19470.2	22276.9	22675.3	13786.7	12502.9	21037.2	16468.2	18393.2	19207.2	17745.3	25397.8	33384.2	31880.9	15370.3	60008.3	33066.8	63474.5	60335.4	53345.9	64423.9	42056.9	65547.4	68916	71965	66655.3	74347.7
144.102@3.01	1000	12392.1	12730.7	18630.2	1000	12388	14505.1	18810.9	1000	17182.5	14735.4	17923.4	19773.7	17493	1000	19595.3	17027.9	17460	17040.9	1000	19173.1	1000	18960.8	17995.2	16675.7	19934.9	17024.8	1000	11047.5	14101.3	13577.4	12693.2	10044.4	11936.7	24859.8	19306.9	24006	26373	28303.1	23441.3	22213.7	14897	28457.1	13547.7	28550.9	28495	29518	22603.5	32910.3
144.102@3.63	1000	1000	17745.6	18447.8	13369.8	1000	14489.1	17128.7	1000	17291.1	1000	16128.9	15804.2	16442.3	1000	1000	1000	15340.1	18313.6	14437.7	14535.2	18082.6	11253	1000	15547.4	11086.2	1000	13938.1	1000	1000	1000	1000	1000	25206.2	24554.7	22898.5	17606.8	27523.9	24105.8	12231.4	26863.7	1000	21153.3	27040.8	21048.9	37256	14455.9	12812.4	1000
144.102@9.07	1000	1000	1000	1000	15083	1000	1000	1000	1000	16851.7	1000	13012.5	18748.7	13269.1	19833.7	20071	23239.6	20313.8	31284.3	34124.5	29130.2	35382.3	35250.1	39623	59284.2	57401.2	57147.5	64020.1	64538.4	67257.6	65666.9	66926.8	67268.1	32552.4	34941.7	28739.2	32616.1	36730.8	33686.8	29513.9	31202.6	29902.3	31029.4	29233.6	30234.5	37908.2	34021.6	36361.9	45444.5
144.102@1.54	23039.3	19188.8	14954.2	14190.6	17122.8	1000	20280.2	19312.4	1000	11277.1	18702	1000	16144.1	13435.5	1000	22760.6	15882.8	19282.3	1000	21005.9	15408.4	1000	1000	1000	26066.3	21543.3	23233	1000	16729.7	14734.7	14458.8	14959.5	1000	75141.2	65471.9	75763.6	55380.1	63780.1	55288.3	54591.4	77225.3	49326.5	79099.6	62648.6	59367.9	59101.1	76913.5	67515.7	70355.6
144.605@1.54	1000	1000	1000	1000	1000	1000	1000	1000	1000	1000	1000	1000	1000	1000	1000	1000	1000	1000	1000	1000	1000	1000	1000	1000	1000	1000	1000	1000	1000	1000	1000	1000	1000	56117.8	64690.5	58006.8	35692.1	45077.3	36858.2	34648.8	42963.2	28523.1	17478.8	28249.1	1000	15515.9	12965.5	15878.8	1000
144.957@1.64	78888.6	21925.6	21992.9	32593.1	36124.6	103819	25337.3	14260	40690.7	36039.5	96873.8	104686	33730.5	12689.7	33075.7	86661	100817	30150.2	32536	100871	102982	84327.9	91115.5	63306.1	22203.1	77796.3	31611.1	106177	108777	29229.2	67163.5	29370	100236	1000	49375.2	1000	25183.6	56738.7	1000	1000	24533.6	31879.2	35538.1	1000	23861.9	16961.1	1000	30878.6	16617.4
144.957@1.05	141075	170612	191058	229052	201216	212465	269278	212082	220704	303562	187781	232682	169158	198694	202713	167405	256224	197882	242873	215426	239544	215027	238551	208326	198830	202602	202530	177230	191134	207553	175908	156973	229078	177509	139628	151492	206474	191373	189110	238189	248976	190655	180730	171362	165727	187590	234851	168676	178467
144.982@15.53	332488	319847	277613	154382	237203	83425.7	95158.5	84645	106304	171438	986742	220949	140425	176569	187054	715659	37268	110365	141687	166566	152990	93044.3	92251.8	80522.4	49829.3	85550.6	82997.9	746943	159473	87019.2	140357	66211.3	140966	160621	314453	195994	162911	273794	298303	159559	210339	142558	146994	75935.7	152689	181197	76920.9	82230.4	80057.9
144.982@15.71	349641	253707	260897	118399	106437	299220	289997	256460	1.1508e+06	139423	126250	71232.3	171224	75729.5	117039	186918	194477	221653	741149	61898.3	133166	169817	120756	96302.3	109119	765863	182650	101087	168045	145876	115893	152432	54454.5	344065	275553	1.43214e+06	127248	112758	340245	183331	143793	207988	140552	220082	907732	939946	580406	40829.3	153721
144.982@15.82	171335	335480	250493	196100	106437	65738.6	260529	102101	277141	156076	91679.6	1.01116e+06	132617	840669	138301	157494	209586	170651	102646	162338	52145	163461	187183	760361	645500	168339	167675	144382	82880.4	690142	61613.9	690368	100055	164058	291300	285431	215813	131506	309094	1130949	116793	202531	1.02953e+06	235080	153818	182258	187748	90446.4	180008
144.982@15.94	141445	196623	121510	208427	1.32083e+06	87997.7	271642	247828	257404	100440	140636	222411	838774	160164	128568	171370	838353	900424	140228	781602	100420	183202	177016	166948	66970.8	138166	179573	50592.3	742745	49964.6	658286	108200	155613	118942	204615	333849	144361	212132	128928	269042	1057519	1107828	107639	95978.2	172401	166312	203403	867963	867240
144.982@13.58	228216	223679	225722	131756	190871	196778	163936	174856	97945.8	81157.3	140089	104942	120333	133039	118289	128378	65465.6	131005	111988	41028.9	122128	105959	107379	126099	113047	104133	107176	95028.5	101836	59252.2	697420	112456	111799	219694	203662	170850	193798	179522	85870.7	37347.6	172955	173008	136713	156422	149538	88204.4	119523	125861	65071.2
144.982@13.42	229916	210626	224565	195716	192414	151271	142368	154215	152171	156790	136050	142181	130721	136383	128598	77420	835998	127043	111864	132425	119153	48447.4	108709	119096	700491	713382	111477	104750	110705	115385	105140	122707	98415.9	216223	198693	182469	94226.3	130930	177310	172177	175984	157465	151183	135374	139169	134336	140105	122170	136418
144.982@13.29	206927	199395	156845	200403	183541	150018	152199	171365	161339	84311.1	132891	155533	127854	143924	865417	135684	118660	126828	108203	113641	113156	124778	86742.2	121340	36535.3	93628.3	107673	110523	110570	116688	117308	119809	111468	226915	192223	95798.4	157314	171665	186282	163301	160900	155544	42666.8	147635	152776	135850	122879	127014	104323
144.982@13.13	197466	103394	217302	141183	162641	165475	154381	162553	151318	139500	65311.6	143169	76554.5	120475	118403	123020	125402	118453	104489	102527	748566	68831.1	115693	56854.7	111384	112087	113978	109607	106521	107820	107584	111461	95257.3	191466	172131	187351	143340	170691	94949.2	156539	146966	157648	130012	134389	144445	133153	130611	31446.5	121371
144.982@0.33	673209	581298	1.10089e+06	717229	588167	832547	439248	572460	448976	427454	686149	732362	581099	640925	64250.9	716519	537500	583014	457923	389710	390786	409726	608088	425368	480754	514210	471423	476006	444584	400239	50411.9	362426	361678	966232	1.08483e+06	891032	507295	590437	776641	549896	584830	527516	400406	655981	646666	514194	522129	605583	502762
145.05@1.28	346215	186436	184703	165569	180257	167026	162915	161234	165029	126066	142790	121340	103317	96769.9	101042	75885	88565.8	79250.9	59835.9	60334.4	28377.8	46442.1	47817.1	34412.8	46971.7	43563.4	36340.1	41482.8	47784	52829.6	43187.9	48171.3	35149	179278	179977	186550	175483	167575	167482	158838	167818	170575	109287	145732	137780	116900	130296	124316	115428
145.05@1.51	107088	92896.2	30319.8	29813.3	18654.5	34818.4	55875.7	46303.7	58191.2	24438.7	37758.8	10645.6	23980	18474.1	28797.3	1000	1000	1000	10597.2	1000	1000	15829.8	1000	1000	1000	1000	11677.3	1000	1000	1000	1000	1000	1000	101555	58821.2	80286.6	31660.6	83325.6	57036.6	26166.7	87986.9	72162.6	52371.9	16872.7	56387.6	39310.5	38997.5	40635.1	41618.3
145.108@1.31	1000	1000	1000	50899.9	53362.7	57055.2	137729	147009	152837	233081	238397	232342	306698	310682	316379	352696	355780	381459	379476	405339	402892	371878	386070	388688	389507	379397	391237	399563	396918	408598	388798	402181	428181	25077.5	24206	12517.8	33432.4	1000	33060.9	43519.8	38420.6	38767.4	41947.4	44921.3	48990.4	47389.1	51877.8	51121	49829.2
145.513@1.97	1000	1000	1000	1000	1000	1000	1000	1000	1000	1000	1000	1000	1000	1000	10153.3	1000	44560.8	46487.1	62282.3	63005.9	67193.3	66566	26151.2	63412.1	26135.1	53492.5	55921.3	41127.9	44540.6	46270.5	1000	16137.6	43441.8	1000	10300.4	1000	25465.2	16762.9	59846	24434.1	69669.8	55848.5	54651.1	57916.4	22415.9	26515.5	29147.1	26294.8	32275.1
145.513@1.75	1000	1000	1000	1000	1000	1000	1000	1000	1000	1000	1000	1000	1000	1000	1000	15413.5	20396.8	11226.9	16175.5	10265.3	10842.1	11727	24636.1	14076.8	18935.5	18365.4	1000	1000	1000	12125.8	1000	14777.5	1000	14708.6	1000	1000	23064.3	20066.7	25737.2	25280.5	15631.9	14956.4	11801.9	14217.8	22397.4	69376.9	42809.9	47206.2	76677.7
146.02@0.33	56596.5	65015.4	95532.5	58884.1	56838.6	26286	17739.7	57045.3	15784.2	21599.2	50144.2	44254.8	92802.2	41933.3	63517.7	62309.5	76958.8	44550	62345.8	42863.9	42978.7	47123.8	32334.4	42774.2	53137	50700.9	75691.3	14436.4	31488.7	38689.1	39186.6	49352.3	40446.5	51087.6	106253	77707.5	50167.9	61469.1	43912.6	50923.1	27753.5	34528.1	44021.5	38272.8	35385	59385.6	28407.4	68274.4	29236.7
146.027@1.55	19348.4	17486.4	18918.5	90443.5	86967.3	86188.8	340191	338721	353014	743312	725701	799900	894692	914367	933013	602115	606089	614718	316669	351130	324098	151553	161469	177250	229632	222195	141802	215811	245361	261128	141562	154649	101723	17293.5	1000	16625.6	75015.4	73999.7	88324.3	178748	192158	225638	241252	242960	283818	211683	212902	246193	145554
146.03@1.06	97293	98244.9	94338.3	97952.2	103071	104058	110749	108370	110573	114231	109351	114701	117312	122791	122056	118254	124928	114186	124487	117618	132784	121658	138414	122461	126978	126731	184936	133403	134949	135500	141352	153236	163623	162382	155125	154474	158383	161965	153495	167815	188610	174206	175298	184147	185166	194973	205235	188375	187533
146.048@15.37	1000	1000	1000	10500.1	13251.2	1000	1000	15901.6	30419.1	14015.7	20153.2	14012.4	20502.4	22043.4	34032.1	18276	43828.4	32389.6	18954.8	42185.4	38734.7	34932.7	20249.9	28438.9	92141.8	41959.8	38433.6	31165.3	38599.7	27188.4	32323.8	43161.6	38763.1	1000	1000	1000	1000	19832.9	20744	12649.3	16258.4	13238.5	25364	43871.8	41314.2	20926.9	49296.7	49814.2	32563.5
146.048@15.47	1000	1000	1000	10052.9	14661.1	1000	20215.2	21706.3	48484.9	42964.2	24235.2	24471.2	52167.7	25681.1	34032.1	18276	42855.4	40451.8	80176	37444.2	105163	84412.4	24871	50590.3	108187	299437	49228.4	47616.3	104439	65586.2	17115.6	26358.1	87284.2	1000	1000	1000	14066.9	24640.6	51183.1	1000	28427.3	27275.5	25364	66278.9	18227.1	20926.9	55610.7	35862.7	58759.5
146.048@15.59	1000	1000	1000	10844.2	15333.8	26687	19534.3	52471.5	1000	76356.7	35108.8	19621.1	33484.5	81121	382262	52265.6	30069.2	100496	77134.9	53372.5	70988.9	78066	18584.7	33950.2	57261.7	18496.9	46290.3	208547	56620.3	55132.4	56714.1	95502.3	60178.2	1000	1000	1000	1000	74845.2	26169.8	27286.9	15750.4	66659.3	60449.8	37852.7	84076.3	56086.6	81968.9	35862.7	31321.3
146.048@15.71	1000	1000	1000	24969.4	11332.6	28400.9	46643.6	86495.6	51905.3	34998.9	80668.5	30530.9	322578	71457.6	117039	55628	53867.6	55235.5	135506	28498.6	29287.2	109986	74657.1	93213.2	58983.6	42655.9	41885.1	45181.5	137023	55132.4	35730.5	431751	41500.4	20992.6	1000	1000	15930.9	21338.6	23341.8	37982.8	49312.8	148732	21602.3	19031	79886.9	43177.2	106201	142951	106547
146.048@15.86	15456.9	1000	10257.3	31983.3	40347.4	24632.1	92645.1	18134	62423.1	35722	72176	72960.8	29591.7	58156.8	67100.6	129150	147617	49760.3	113728	119485	90548.8	492649	146838	89622.1	49091.7	144870	127901	56250.9	46910.6	379221	465152	75100.4	45964.8	16867.8	1000	30153.7	27578.6	144432	39925.6	52231.1	56872.7	73976.1	48991.7	74333.6	69829.2	99952.1	63687.9	54163.9	85150.4
146.048@15.98	1000	1000	1000	23279.6	23830.8	58067.7	48088	37694.6	102219	71334.4	62082.8	105808	48723.2	33236.8	69024.6	92001.2	51273	124057	113052	19875.4	58699.5	102238	474045	502305	49091.7	41865.6	98893.5	21186	131263	58404.9	95847.4	74950.1	53011.2	1000	1000	19433.8	38036.2	62796.2	55996.5	35956.9	69579	83373.8	46140.6	19684.3	79347	134978	18417.8	38368	115945
146.048@0.27	140700	67155.4	96208.8	670754	789584	760600	133286	240462	249126	311763	286806	275299	298276	280400	286423	221166	47840.1	50862.7	261408	245772	56142.7	357648	89764.5	270542	356951	128668	337981	194780	122396	102749	62927.8	252955	266973	106694	159412	68200.6	758190	731723	742343	262777	198033	241158	257119	174820	53608.4	326333	388072	183717	264285
146.06@2.41	125668	145005	144278	146355	147422	156615	153897	167087	162124	175903	180660	170124	178269	187246	180256	178022	184241	185090	188150	186741	196533	198450	201000	189454	195111	199790	202692	193910	200057	201257	189544	198133	201198	132688	139308	148650	146871	153322	148931	151669	162340	159256	160681	169793	166578	170198	179352	169442	172472
146.06@11.12	19609.7	20590.7	18997.2	18331.1	20349.2	15034	18328.1	15933.7	17105.4	19624.3	16400.1	20311.6	27863.4	27873.1	24969.7	24890.8	28237.3	27236.8	26329	19167.9	24877.2	25091.9	22576.6	26927.2	16773.5	22658.1	22981.6	22488.1	23248	25844.5	26057.6	25743.2	27692.4	28393.7	24161.6	27953.9	31869.3	31630.6	34033.1	25485.9	31078	31018.1	24079.5	26394.3	24659.2	22939.2	27751.6	29853.1	28967.4
146.06@7.2	3.84075e+06	4.15941e+06	4298692	4.02577e+06	4.3432e+06	4.23596e+06	3.88943e+06	4.1517e+06	4182473	3.95942e+06	4.06812e+06	4089036	3.74064e+06	3903719	3.92254e+06	3.57303e+06	3742468	3.729e+06	3532908	3.72931e+06	3673665	3.56031e+06	3.67985e+06	3684763	3.5613e+06	3.58322e+06	3.69e+06	3.48261e+06	3.61159e+06	3564914	3.29988e+06	3.57907e+06	3.72345e+06	4.21748e+06	4.25611e+06	4.51932e+06	4.17386e+06	4.43973e+06	4563286	4256748	4404602	4.43676e+06	4107774	4403511	4.38989e+06	4075075	4.32641e+06	4265880	3.93895e+06
146.06@7.1	1000	1000	3.33039e+06	1000	3.04827e+06	1000	2.94547e+06	1000	3.35066e+06	1000	2.83659e+06	1000	2.04055e+06	1000	2.64734e+06	1000	2540368	1000	2287319	1000	1000	1000	1000	2.7284e+06	1000	2523356	1000	2.13463e+06	1000	2.54731e+06	1000	2.66254e+06	1000	1000	3382348	1000	2.63996e+06	1000	1000	1000	1000	1000	1000	1000	1000	2277439	1000	2845961	1000
146.06@9.95	1000	14062.3	1000	13199.3	11777.9	18178.8	15229.9	1000	1000	1000	12054.7	17810.4	16283.1	19786.7	16619.9	17222.2	18701	10896.4	17509.4	14452.4	18428.8	17840.8	18275.3	17987.2	17614.3	17774.2	17792.6	17364.6	22072.5	19773.4	11347.2	19300.6	20889.7	27262.6	30542.5	26341	27640.6	29365.2	25573.8	27381.9	29028	27511.9	27220.9	31101.4	25493.2	25454.5	29546	29845.2	26624.2
146.06@2.81	195077	210214	209061	220094	229856	236109	234064	244931	247829	267972	264871	255651	266527	266267	267575	264267	269529	274551	275335	274808	296192	278976	300573	290588	280596	289326	290181	287938	293460	291580	277480	293057	294972	211737	218835	223080	213607	231712	239050	237871	238812	244268	243049	259709	252098	264170	263711	258796	264453
146.06@7.76	134972	141605	159990	162307	195007	187958	189628	215326	216428	223066	227311	231355	224004	222649	208589	210597	213995	212552	198524	211084	208744	207621	224536	223981	206840	210164	226598	211351	215888	220219	210561	227414	223564	135946	133529	142973	164419	164779	156269	165645	201657	157921	167945	181206	189609	163364	181483	168649	183604
146.06@3.38	1000	1000	1000	1000	1000	1000	1000	1000	1000	1000	1000	1000	1000	1000	1000	1000	1000	1000	1000	1000	1000	1000	1000	1000	1000	1000	1000	1000	1000	1000	1000	1000	1000	1000	1000	1000	10677.3	10798.4	1000	1000	1000	1000	1000	1000	1000	1000	1000	1000	1000
146.092@1.47	71898.9	64357.1	66571.7	97651	92488.9	97182.3	112341	105529	107403	137732	146881	135094	148861	141209	150647	139140	167916	161748	154664	164550	190237	166639	181771	208133	324967	334945	348269	355678	377235	341643	357419	375288	376483	628944	657644	622721	684775	692901	676721	745516	789362	752767	855882	866149	822874	998005	981629	979306	1.15591e+06
146.117@1.28	1000	1000	1000	1000	1000	1000	1000	1000	1000	1000	1000	1000	12708.5	1000	11855.3	19514.5	13618.7	14679.6	25654.5	22643.2	25760.9	26943.7	27804.2	1000	16851.3	30437.2	31208.8	25438.7	33815.8	37524.7	18758.6	1000	18989.6	16137	16060.9	14297	13894.1	13902	12592.1	13262.1	13295.1	1000	11387.1	11941.6	1000	14653.3	1000	16830.5	12660.6
146.117@15.73	1000	1000	1000	1000	14611.9	17506.1	15757.8	22131	31508.5	29683.7	13748.1	49908.6	27587	19037.9	18171.5	23349.3	35794.7	35183	67084.8	66735.4	63284.3	17598.2	26733.4	69241.6	62918.3	28148.7	18518.5	135892	25845.9	1000	22170.9	1000	26665	1000	1000	1000	15086.2	19258	1000	54249.3	10294.8	11054.6	21486.3	22745.3	123149	22027.2	77347.5	22586.2	32246.7
146.117@15.89	1000	1000	1000	1000	34183.4	1000	25249.4	21360.2	40222.2	35583	32074.6	35058.3	11720.9	66270.9	36413.3	40210.9	50569.1	44154.3	51350.8	11498.3	13985.3	47286.7	29544.7	19286	76925.5	136030	22782.9	42058.5	42626.9	51540.3	19086.7	66058.4	55975.4	1000	1000	1000	1000	1000	12315.4	44365.7	1000	1000	15121.6	16973.2	24451.1	22567.9	34409.7	21758.2	31865.2
146.118@6.12	1000	1000	1000	1000	1000	1000	1000	1000	1000	1000	1000	1000	1000	1000	1000	1000	1000	1000	1000	1000	1000	1000	1000	1000	1000	1000	1000	1000	1000	1000	1000	1000	1000	1000	1000	1000	1000	1000	1000	1000	1000	1000	1000	1000	1000	1000	1000	1000	1000
146.118@5.82	1000	1000	89623.1	1000	89181.7	1000	82934.5	1000	84152.7	1000	85111.8	1000	84497.8	1000	88200.4	1000	85661.6	1000	78419.3	1000	1000	1000	1000	85995.9	1000	78616.8	1000	85912.3	1000	85075.5	1000	88494.6	1000	1000	88136.1	1000	79986.6	1000	1000	1000	1000	1000	1000	1000	1000	79385.3	1000	89625.7	1000
146.118@5.98	80710.2	82326.9	1000	88156.9	1000	91512.2	1000	93282	1000	87773.1	1000	90087.2	1000	87158.7	1000	79694.8	1000	86900.7	1000	85047.1	86628.1	76802.2	81649.6	1000	79414.7	1000	83960	1000	85300.2	1000	81667.9	1000	95362.4	77659.5	1000	84099.7	1000	87602.1	88529.8	84229	87020.1	86210.4	86706.6	86301	88377.2	1000	89415.8	1000	80750.7
146.165@1.06	1000	1000	1000	1000	1000	1000	14347.5	21489.6	19742.8	31373.4	30983.3	29400.4	44822.3	49446	48512.1	48753.5	56950.5	53789.2	63200.1	65968.7	68202.8	75859.9	79998	79052.3	99493.9	99918	103551	105993	112783	111567	110599	114207	119116	247087	251850	236836	274071	297905	273441	286451	325050	289333	309151	322280	303313	316238	341365	318894	359579
146.539@8.53	33776.3	36868.7	39650.4	41002.4	47424.5	44774.4	50845.5	47923	54884.6	52083.6	60095.6	52293.8	61065.6	65626.4	61780.9	60530.6	61789.9	56677.5	60497.1	64694.3	63159.2	62690.3	63602.6	64649.2	68136.5	61923.1	67272	53244.9	54485.4	59203.6	55340.7	57010.6	55986.6	38103.9	35777.3	36323.8	39210.7	43851	39877.2	47764.8	44280.7	47195.1	51278	52314.5	52790.7	53157.7	57161.3	52364	51214.5
146.978@0.34	222563	227636	244711	310483	195620	60248.6	170093	379970	278312	135893	159403	171022	79891.3	142858	101279	22464.9	184870	234150	165830	146009	145723	80361.6	139481	145482	161685	161083	164951	118031	128351	138774	142919	133854	83628.9	412251	484222	392932	199643	192387	202723	183220	25785.7	260664	153000	168771	234790	74770.9	196060	103238	179768
146.98@15.74	112335	144970	92334.1	77953.7	78295.6	129108	104165	31995.4	409490	86163.8	301827	30647.8	65965	72969.5	38362.8	75390	34724.1	16701.7	52213.1	47471.8	38990.4	59971.1	66305.8	27700.6	34750.5	223739	235899	37290.9	54891.8	57816.3	16797.6	33390.6	34599.9	72702.8	44284	64556.8	47207	130336	57417.5	53384.7	30420.8	107771	89962.3	33070.1	67776.7	36495.2	289996	40595.2	21959.1
146.98@15.9	149249	102680	588879	419156	482559	501133	52282.7	76690.6	100126	392392	95152	348332	298629	320414	75779.9	66682.4	333573	306275	34354.2	62165.3	79676.6	31490.2	18971.1	33947.9	36704.8	24327.1	19256.8	199396	32128.2	32455.9	68133.2	231448	56331.3	86225.6	27355.1	480373	54902.7	80814.7	519803	426685	377088	117370	35775.6	62684.4	26478.2	36495.2	54784.3	248495	291081
147.042@10.22	1000	1000	1000	1000	1000	1000	1000	1000	1000	1000	1000	1000	1000	1000	1000	1000	1000	1000	1000	1000	1000	1000	1000	1000	1000	1000	1000	1000	1000	1000	1000	1000	1000	1000	10192	10328.9	1000	1000	1000	1000	10074.2	1000	1000	1000	1000	1000	1000	1000	1000
[truncated: 6,135 more rows]
[truncated: 281 more columns]

## Sheet: ST2--measured concentrations
Supplementary Table ST2 - Time series of the measured cell properties and concentrations of the key substrates and metabolites
[truncated: 130 more rows]

## Sheet: ST3--IVCD overall productivity
Supplementary Table ST3 -Integral viable cell density, overall specific antibody producitivity, and exchange rates for key extracellular substrates and metabolites
[truncated: 10 more rows]

## Sheet: ST4-Glycan analysis ANOVA
Supplementary Table ST4 - N-glycan analysis two-way ANOVA
[truncated: 874 more rows]
